# Supplementary material for: Comparative genomic analysis of eutherian adiponectin genes
Source: PubMed Central journal article supplement (PMC6040601; doi:10.1016/j.heliyon.2018.e00647), 2018-06-06
Supplement: mmc3.pdf [file mmc3.pdf]

# A

```

      10      20      30      40      50      60
Homo sapiens ADIB      1  CACACACACACAACCCCTCAGCCAGATGCTGGGGCAGGGGACAGTTCCCTCATTTCCGACACTGAC 65
Pan troglodytes ADIB   1  CACACACACACAAGCCCTCAGCCAGATGCTGGGGCAGGGGACAGTTCCCTCATTTTGGACACTGAA 65
Pongo abelii ADIB      1  CACACACACACAAGCCCTCAGCCAGATGCTGGGGCAGGGGACAGTTCCCTCATTTCCGACACTGAC 65
Nomascus leucogenys ADIB 1  CACACACACACAACCCCTCAGCCAGATGCTGGGGCAGGGGACAGTTCCCTCATTTCCGACACTGAC 65
Callithrix jacchus ADIB 1  CACACACACACAATGCCCTCAGCCAGATGCTGGGGCAATGGACATTTCCCTCATTTCCGACACTCAT 65

      70      80      90      100     110     120     130
Homo sapiens ADIB      66  TGCCGGTGGGGGA-TGTGGAT-GGGGTAATTGCTGTGGTCAGTCTGGCTCAGCACCCAAAAGAAA 128
Pan troglodytes ADIB   66  TGCCGGTAGGGGGG-TGTGGAT-GGGGTAATTGCTGTGGTCAGTCTGGCTCAGCACCCAAAAGAAA 128
Pongo abelii ADIB      66  TGCCGGTGGGGGA-TGTGGACAGGGGTAATTGCTGTGGTCAGTCTGGCTCTGCACCCAAAAGAAA 129
Nomascus leucogenys ADIB 66  TGCCGGTGGGGGA-TGTGGAC-GGGGTAATTGCTGTGGTCAGTCTGGCTCAGCACCCAAAAGAAA 128
Callithrix jacchus ADIB 66  GACTGCCGGTGGGAT-TGTGGACGGGGTCTTGCTGTGGTCAGTCTGGCTCAGCACCCAAAAGAAA 130

      140     150     160     170     180     190
Homo sapiens ADIB      129  GTGTCAAGTCAGGGAAAATTCTGGGAAAGGGGATGTGGGATTTGGGGAGGGCAGAGAAGGGGAG 193
Pan troglodytes ADIB   129  GTGTCAAGTCAGGGAAAATTCTGGGAAAGGGGATGTGGGATTTGGGGAGGGCAGAGAAGGGGAG 193
Pongo abelii ADIB      130  GTGTCAAGTCAGGGAAAATTCTGGGAAAGGGGATGTGGGATTTGGGGAGGGCAGAGAAGGGGAG 194
Nomascus leucogenys ADIB 129  GTGTCAAGTCAGGGAAAATTCTGGGAAAGGGGATGTGGGATTTGGGGAGGGCAGAGAAGGGGAG 193
Callithrix jacchus ADIB 131  GTGTCAAGTCAGGGAAAATTCTGGGAAAGGGGATGTGGGATTTGGGGAGGGCAGAGAAGGGGAG 194

      200     210     220     230     240     250     260
Homo sapiens ADIB      194  GGGGCCAGCCCTGCTTTGGGCAATCCTTGCTCTGACCACTCAGACACCGTGTCCCTCTGCCTGG 258
Pan troglodytes ADIB   194  GGGGCCAGCCCTGCTTTGGGCAATCCTTGCTCTGACCACTCAGACACCGTGTCCCTCTGCCTGG 258
Pongo abelii ADIB      195  GGGGCCAGCCCTGCTTTGGGCAATCCTTGCTCTGACCACTCAGACACCGTGTCCCTCTGCCTGG 259
Nomascus leucogenys ADIB 194  GGGGCCAGCCCTGCTTTGGGCAATCCTTGCTCTGACCACTCAGACACCGTGTCCCTCTGCCTGG 258
Callithrix jacchus ADIB 195  AGGGCCAGCCCTGCTCTGGGCAATCCTTGCTCTGACCACTCAGACACCGTATCCCTCTGCCTGG 259

      270     280     290     300     310     320
Homo sapiens ADIB      259  GAGAGGGGAAGCAGATCTGAGGACATCTCTGTG-CCAGGCCAGAAACCGCCACCTGCAGGTGAG 322
Pan troglodytes ADIB   259  GAGAGGGGAAGCAGATCTGAGGACATCTCTGTG-CCAGGCCAGAAACCGCCACCTGCAGGTGAG 322
Pongo abelii ADIB      260  GAGAGGGGAAGCAGATCTGAGGACATCTCTGTG-CCAGGCCAGAAACCGCCACCTGCAGGTGAG 323
Nomascus leucogenys ADIB 259  GAGAGGGGAAGCAGATCTGAGGACATCTCTGTG-CCAGGCCAGAAACCGCCACCTGCAGGTGAG 322
Callithrix jacchus ADIB 260  GAGAGGGGAAGCAGATCTGAGGACATCTCTGTG-CCAGGCCAGAAAGCTGACACCTGCAGGTGA- 323

      330     340     350     360     370     380     390
Homo sapiens ADIB      323  GCCCGGACCCCTGCCAGGTATGGGCAGATGGCCATTTCCTCCACCTTCGCCACCTTCCGTGAAA 387
Pan troglodytes ADIB   323  GCCCGGACCCCTGCCAGGTATGGGCAGATGGCCATTTCCTCCACCTTCGCCACCTTCCGTGAAA 387
Pongo abelii ADIB      324  GCCCGGACCCCTGCCAGGTATGGGCAGATGGCCATTTCCTCCACTTCTTCGCCACCTTCCGTGAAA 388
Nomascus leucogenys ADIB 323  GCCCGGACCCCTGCCAGGTATGGGCAGATGGCCATTTCCTCCACCTTCGCCACCTTCCGTGAAA 387
Callithrix jacchus ADIB 324  -----GGGCAGATGGCCATTTCCTCCACCTTCGCCACCTTCCGTGAAA 386

      400     410     420     430     440     450
Homo sapiens ADIB      388  TGTGGTGCCAGGGCAGCTTGGTGTGTGAGGGGAAGGAGGGTTCCTCACTC-CTGCTGGGCCCGG 451
Pan troglodytes ADIB   388  TGTGGTGCCAGGGCAGCTTGGTGTGTGAGGGGAAGGAGGGTTCCTCACTC-CTGATGGGCCCGG 451
Pongo abelii ADIB      389  TGTGGTGCCAGGGCAGCTTGGTGTGTGAGGGGAAGGAGGGTTCCTCACTC-CTGTGGGCCCGG 452
Nomascus leucogenys ADIB 388  TGTGGTGCCAGGGCAGCTTGGTGTGTGAGGGGAAGGAGGGTTCCTCACTC-CTGCTGGGCCCGG 451
Callithrix jacchus ADIB 367  CGTGGTGCCAGGGCAGCTTGGTGTGTGAGGGGAAGGAGGGTTCCTCACTC-CTGCTGGGCCCGG 430

      460     470     480     490     500     510     520
Homo sapiens ADIB      452  GGCCTGGGCTGAAGAAAAGGCCCCACCATCCATCCATGGTGAGGCTCCGGGGGAGGAAGGAAGG 516
Pan troglodytes ADIB   452  GGCCTGGGCTGAAGAAAAGGCCCCACCATCCATCCATGGTGAGGCTCCGGGGGAGGAAGGAAGG 516
Pongo abelii ADIB      453  GGCCTGGGCTGAAGAAAGAGGTCCACCATCCATCCATGGTGAGGCTCCGGGGGAGGAAGGAAGG 517
Nomascus leucogenys ADIB 452  GGCCTGGGCTGAAGAAAGAGGCCCCACCATCCATCCATGGTGAGGCTCCGGGGGAGGAAGGAAGG 516
Callithrix jacchus ADIB 431  GACCTGGGCTTAAGAAAGAGGTGTACCATCCATCCATGGTGAGGCTCCGGGGGAGGAAGGAGG 495

      530     540     550     560     570     580
Homo sapiens ADIB      517  CGAGTCCCGAGGGCTGAGGAGGACGGCCCTGGGGAATGAGAGGGT-----TGGGGGCAGG 573
Pan troglodytes ADIB   517  CGAGTCCCGAGGGCTGAGGAGGACGGCCCTGGGGAATGAGAGGGT-----TGGGGGCAGG 573
Pongo abelii ADIB      518  CGAGTCCCGAGGGCTGAGGAGGACGGCCCTGGGGAATGAGAGGGT-----TCGGGACAGG 574
Nomascus leucogenys ADIB 517  CGAGTCCCGAGGGCTGAGGAGGACGGCCCTGGGGAATGAGAGGGT-----TGGGGGCAGG 572
Callithrix jacchus ADIB 496  CAGGATCCCGAGAGCTGGGGAGGACGAGCCCTGGGGAATGAGAGGGTGGCAGGGTGGGGCAAGG 560
```

|                                 |     | 590        | 600        | 610        | 620         | 630         |             |
|---------------------------------|-----|------------|------------|------------|-------------|-------------|-------------|
| <i>Homo sapiens ADIB</i>        | 574 | TGAGGGGCTG | GCGGGGACAG | TCAGCTCTCT | CCCTCCCAGTT | CCTTCTCCGGG | 626 (-1 bp) |
| <i>Pan troglodytes ADIB</i>     | 574 | TGAGGGGCTG | GCGGGGACAG | TCAGCTCTCT | CCCTCCCAGTT | CCTTCTCCGGG | 626 (-1 bp) |
| <i>Pongo abelii ADIB</i>        | 575 | CAAGGGGCTG | GCAAGGACAG | TCAGCTCTCT | CCCTCCCAGTT | CCTTCTCCGGG | 627 (-1 bp) |
| <i>Nomascus leucogenys ADIB</i> | 573 | TGAGGGGCTG | GCGGGGACAG | TCAGCTCTCT | CCCTCCCAGTT | CCTTCTCCGGG | 625 (-1 bp) |
| <i>Callithrix jacchus ADIB</i>  | 561 | TGAGAGGCTG | --GGGCCAGA | TCAGCTCTCT | CCCTCCCAGTT | CCTTCTCCGGG | 611 (-1 bp) |

# B

|                                |   |                           |               |            |                         |                         |                         |    |
|--------------------------------|---|---------------------------|---------------|------------|-------------------------|-------------------------|-------------------------|----|
|                                |   | 10                        | 20            | 30         | 40                      | 50                      | 60                      |    |
| <i>Homo sapiens ADIC</i>       | 1 | GATTACCTGTGGGAGTGTATGAATG | TGTGTGTC      | CCGTGCAAGT | GAGGGACAGG              | GTCTATTTGGGTA           |                         | 65 |
| <i>Macaca mulatta ADIC</i>     | 1 | GATCACCTGTGGGAGTGTATGAATG | GTGTGTCCATGT  | GAGT       | GAGGGACAGAGTCTATTTGGGTA |                         |                         | 64 |
| <i>Papio hamadryas ADIC</i>    | 1 | GATCACCTGTGGGAGTGTATGAATG | TGTGTGTC      | CCGTG      | GAGT                    | GAGGGACAGAGTCTATTTGGGTA |                         | 65 |
| <i>Callithrix jacchus ADIC</i> | 1 | GATCACCTGTG               | GAGTGTATGAATG | TGTGTGTC   | GGTGC                   | GAGT                    | GAGGGACAGAGTCTATTTGTGTA | 64 |

  

|                                |    |                          |                                |                   |                   |     |     |     |
|--------------------------------|----|--------------------------|--------------------------------|-------------------|-------------------|-----|-----|-----|
|                                |    | 70                       | 80                             | 90                | 100               | 110 | 120 | 130 |
| <i>Homo sapiens ADIC</i>       | 66 | TCAGTTGTGTGCTAGGG        | GGGTATAGTGGATTTCT              | GAGTTTGCCTACT     | TGTGTTTTGTAGGTGG  |     |     | 129 |
| <i>Macaca mulatta ADIC</i>     | 65 | TCAGTTGTGTGCTAGGG        | GGGTATAGTGGATTTCCAAGTTTGCCTACT | TGTGTTTTGTAGGTACA |                   |     |     | 128 |
| <i>Papio hamadryas ADIC</i>    | 66 | TCAGTTGTGTGCTAGGGGGGGTTT | TAGTGGATTTCCAGTTTGCCTACT       | TGTGTTTTGTAGGTGCA |                   |     |     | 130 |
| <i>Callithrix jacchus ADIC</i> | 65 | TCAGTTGTGTGCTAGGG        | GTGTGTAGTGGATTTCT              | GAGTTTCCATATC     | TGTGTTTTGTAGGTGTG |     |     | 128 |

  

|                                |     |                       |            |                                       |                  |                    |     |     |
|--------------------------------|-----|-----------------------|------------|---------------------------------------|------------------|--------------------|-----|-----|
|                                |     | 140                   | 150        | 160                                   | 170              | 180                | 190 |     |
| <i>Homo sapiens ADIC</i>       | 130 | TGGATGAGAG            | CTGTGTTTGT | CTGAGTGTGTGAA                         | GATGTGGGTGTGCTCT | GTTGCATGTGTGG      |     | 191 |
| <i>Macaca mulatta ADIC</i>     | 129 | TGTATGAGAGACTGTGTTTGT | CTGAA      | TGTGTGATGATGTGGGTGTGCTTGGTTACATGTGIGG |                  |                    |     | 191 |
| <i>Papio hamadryas ADIC</i>    | 131 | TGTGTGAGAGACTGTGTTTGT | CTGAA      | TGTGTGATGATGTGGGTGTGCTTGGTTACATGTGIGG |                  |                    |     | 193 |
| <i>Callithrix jacchus ADIC</i> | 129 | TGGGTGAGAGC           | CTGTGTTTGT | TATGACTGTGTGATGAG                     | GGTGA            | TGTGCTTGGTTGCATGTG | --- | 190 |

  

|                                |     |                        |                     |                    |                   |                   |     |     |
|--------------------------------|-----|------------------------|---------------------|--------------------|-------------------|-------------------|-----|-----|
|                                |     | 200                    | 210                 | 220                | 230               | 240               | 250 | 260 |
| <i>Homo sapiens ADIC</i>       | 192 | ATGTGTGTGAGTTTGTGGTTCT | TGTATATG            | CGTGGGGTC          | CTGGG             | CTGATTGAGAGTGGACA |     | 255 |
| <i>Macaca mulatta ADIC</i>     | 192 | ATGTGTGTGAGTTTGTGGTTCT | TGTATATG            | TGTGGGGTCCCTGGC    | CTGATTGAGAGTGGACA |                   |     | 256 |
| <i>Papio hamadryas ADIC</i>    | 194 | ATGTGTGTGAGTTTGTGGTTCT | TGTATATG            | TGTGGGGTCCCTGGCACT | GATTGAGAGTGGACA   |                   |     | 258 |
| <i>Callithrix jacchus ADIC</i> | 191 | ---                    | TGTGTGAGTTTGTGGTTCT | TGTATATG           | TGTGGGGTCCCTGGAG  | CTGATTGAGAGTGGAGC |     | 252 |

  

|                                |     |                       |                    |                |              |     |     |     |
|--------------------------------|-----|-----------------------|--------------------|----------------|--------------|-----|-----|-----|
|                                |     | 270                   | 280                | 290            | 300          | 310 | 320 |     |
| <i>Homo sapiens ADIC</i>       | 256 | TTGAGAGCCCGAGAGGGTGCA | TGTGCACTTGGGGAGGAC | TGTGCATATATCAT | TGTGTGCATGGG |     |     | 320 |
| <i>Macaca mulatta ADIC</i>     | 257 | TTGAGAGCCCGGAGGGTGCA  | TGTGCACTGGGGAGGTT  | TGTGCATATATCAT | TGTGTGCATGGG |     |     | 321 |
| <i>Papio hamadryas ADIC</i>    | 259 | TTGAGAGCCCGGAGGGTGCA  | TGTGCACTGGGGAGGGCT | TGTGCATATATCAT | TGTGTGCATGGG |     |     | 323 |
| <i>Callithrix jacchus ADIC</i> | 253 | CTGAGAGCCCTGGAGGGTGCA | TGTGCACTGGGAGAGGGG | TGTGCATATATCAT | TGTGTGCATGGG |     |     | 317 |

  

|                                |     |                            |               |              |                 |                 |     |     |
|--------------------------------|-----|----------------------------|---------------|--------------|-----------------|-----------------|-----|-----|
|                                |     | 330                        | 340           | 350          | 360             | 370             | 380 | 390 |
| <i>Homo sapiens ADIC</i>       | 321 | ACTCAAGGGTGGGAGCTGGGTGTGAG | ---           | TGTGATGTCCA  | ACCTGCCAGG      | CCCTCCCGTGTCTCC |     | 383 |
| <i>Macaca mulatta ADIC</i>     | 322 | ACTCAAGGGTGTGAGCTGGGTGTGAG | ---           | TGTGATGTCCAG | CCCTGCCAGG      | CCCTCCCGTGTCTCC |     | 384 |
| <i>Papio hamadryas ADIC</i>    | 324 | ACTCAAGGGTGTGAGCTGGGTGTGAG | ---           | TGTGATGTCCAG | CCCTGCCAGG      | CCCTCCCGTGTCTCC |     | 386 |
| <i>Callithrix jacchus ADIC</i> | 318 | ACCCAAGGGTGTGAGCTGGGTGTGAG | TATGTGATGTCCA | GCCTGCCAGG   | CCCTCCCGTGTCTCC |                 |     | 382 |

  

|                                |     |             |             |
|--------------------------------|-----|-------------|-------------|
|                                |     | 400         |             |
| <i>Homo sapiens ADIC</i>       | 384 | ACAGAGGCATC | 394 (-1 bp) |
| <i>Macaca mulatta ADIC</i>     | 385 | ACAGGGACAAC | 395 (-1 bp) |
| <i>Papio hamadryas ADIC</i>    | 387 | ACAGGGACAAC | 397 (-1 bp) |
| <i>Callithrix jacchus ADIC</i> | 383 | ACAGGGGCATC | 393 (-1 bp) |

# C

|                                |     |                                                                    |     |     |     |     |     |     |
|--------------------------------|-----|--------------------------------------------------------------------|-----|-----|-----|-----|-----|-----|
|                                |     | 10                                                                 | 20  | 30  | 40  | 50  | 60  |     |
| <i>Homo sapiens ADIE</i>       | 1   | GTCTGCCTCTAGAACTCTCCACCCATCATCTCTCTGCGTATTTCTCCCTGAAATGGGGTCTGGTCC |     |     |     |     |     | 65  |
| <i>Pan troglodytes ADIE</i>    | 1   | GTCTGCCTCTAGAACTCTCCACCCATCATCTCTCTGCGTATTTCTCCCTGAAATGGGGTCTGGTCC |     |     |     |     |     | 65  |
| <i>Pongo abelii ADIE</i>       | 1   | GTCTGCCTCAGAACTCTCCACCCATCATCTCTCTGCGTATTTCTCCCTGAAATGGAGTCTGGTCC  |     |     |     |     |     | 65  |
| <i>Papio hamadryas ADIE</i>    | 1   | GTCTGCCTCTAGAACTCTCCACCCATCATCTCCCTACGTATTTCTCCCTGAAATGGGGTCTGGTCC |     |     |     |     |     | 65  |
| <i>Callithrix jacchus ADIE</i> | 1   | GTCTGCCTCTAGAACTCTCCACCCATCATCTCTCTGCTTATTTCTCTCTGCAAGGGGGTCTGATCT |     |     |     |     |     | 65  |
|                                |     | 70                                                                 | 80  | 90  | 100 | 110 | 120 | 130 |
| <i>Homo sapiens ADIE</i>       | 66  | TTGGTCTCTGCCACTGCCCTGCCTCTCCTCTGGCCCTGGGAACAGGAGGTGCCCTTGTGTCCG    |     |     |     |     |     | 129 |
| <i>Pan troglodytes ADIE</i>    | 66  | TTGGTCTCTGCCACTGCCCTGCCTCTCCTCTGGCCCTGGGAACAGGAGGTGCCCTTGTGTCCG    |     |     |     |     |     | 129 |
| <i>Pongo abelii ADIE</i>       | 66  | TTGGTCTCTGCCACTGCCCTGCCTCTCCTCTGGCCCTGGGAACAGGAGGTGCCCTTGTGTCCG    |     |     |     |     |     | 129 |
| <i>Papio hamadryas ADIE</i>    | 66  | TTGGTCTCTGCCACTGCCCTGCCTCTCCTCTGGCCCTGGGAACAGGAGGTGCCCTTGTGTCCG    |     |     |     |     |     | 129 |
| <i>Callithrix jacchus ADIE</i> | 66  | TTGGTCTCTGCCACTGTCAGCCTCTCCTCTGGCCCTGGGAACAGGAGGTGCCCTTGTGTCTG     |     |     |     |     |     | 130 |
|                                |     | 140                                                                | 150 | 160 | 170 | 180 | 190 |     |
| <i>Homo sapiens ADIE</i>       | 130 | TCTCTCGAAGTTCTGCCTCTCTGTGCCAGCTCAAGTCTCTCTCCCCCTCTTCTCCCCCTAAA     |     |     |     |     |     | 194 |
| <i>Pan troglodytes ADIE</i>    | 130 | TCTCTCGAAGTTCTGCCTCTCTGTGCCAGCTCAAGTCTCTCTCCCCCTCTTCTCCCCCTAAA     |     |     |     |     |     | 194 |
| <i>Pongo abelii ADIE</i>       | 130 | TCTCTCGAAGTTCTGCCTCTCTGTGCCCTGCTCAAGTCTCTCTCCCCCTCTTCTCCCCCTAAA    |     |     |     |     |     | 194 |
| <i>Papio hamadryas ADIE</i>    | 130 | TCTCTCGAAGTTCTGCCTCTCTGTGCCAGCTCAAGTCTTCTTCCCCCTCTTCTCCCCCTAAA     |     |     |     |     |     | 194 |
| <i>Callithrix jacchus ADIE</i> | 131 | TCTCTCGAAGTTCTGCCTCTCTGTGCCAGCTCAAGTCTCTCTCCCCCTCTTCTCCCCCTAAA     |     |     |     |     |     | 195 |
|                                |     | 200                                                                | 210 | 220 | 230 | 240 | 250 | 260 |
| <i>Homo sapiens ADIE</i>       | 195 | CTTTGGCCGGCCGCCGGGGACACCACGAGTTATTTCCAGCTATTTCCCGGTCCGGGAGCTCTT    |     |     |     |     |     | 259 |
| <i>Pan troglodytes ADIE</i>    | 195 | CTTTGGCCGGCCGCCGGGGACACCACGAGTTATTTCCAGCTATTTCCCGGTCCGGGAGCTCTT    |     |     |     |     |     | 259 |
| <i>Pongo abelii ADIE</i>       | 195 | CTTTGGCCGGCCGCCGGGGACACCACGAGTTATTTCCAGCTATTTCCCGGTCCGGGAGCTCTT    |     |     |     |     |     | 259 |
| <i>Papio hamadryas ADIE</i>    | 195 | CTTTGGCCGGCCGCCGGGGACACCACGAGTTATTTCCAGCTATTTCCCGGTCCGGGAGCTCTT    |     |     |     |     |     | 259 |
| <i>Callithrix jacchus ADIE</i> | 196 | CTTTGGCCGGCCGCCGGGGACACCACGAGTTATTTCCAGCTATTTCCCGGTCCGGGAGCTCTT    |     |     |     |     |     | 260 |
|                                |     | 270                                                                | 280 | 290 | 300 | 310 | 320 |     |
| <i>Homo sapiens ADIE</i>       | 260 | GGCCCCGAACAACCTGGTTTCCTTTGGAGTCTGGGAGGAGGAAAGCCGGAGCCGGCAGGGAGCGA  |     |     |     |     |     | 324 |
| <i>Pan troglodytes ADIE</i>    | 260 | GGCCCCGAACAACCTGGTTTCCTTTGGAGTCTGGGAGGAGGAAAGCCGGAGCCGGCAGGGAGCGA  |     |     |     |     |     | 324 |
| <i>Pongo abelii ADIE</i>       | 260 | GGCCCCGAACAACCTGGTTTCCTTTGGAGTCTGGGAGGAGGAAAGCCGGAGCCGGCAGGGAGCGA  |     |     |     |     |     | 324 |
| <i>Papio hamadryas ADIE</i>    | 260 | GGCCCCGAACAACCTGGTTTCCTTTGGAGTCTGGGAGGAGGAAAGCCGGAGCCGGCAGGGAGCGA  |     |     |     |     |     | 324 |
| <i>Callithrix jacchus ADIE</i> | 261 | GGCCCCGAACAACCTGGTTTCCTTTGGAGTCTGGGAGGAGGAAAGCCGGAGCCGGCAGGGAGCGA  |     |     |     |     |     | 325 |
|                                |     | 330                                                                | 340 | 350 | 360 | 370 | 380 | 390 |
| <i>Homo sapiens ADIE</i>       | 325 | ACCAGGACTGGGGTGACGGCAGGGCAGGGGGCGCCTGGCCGGGGAGAAAGCGGGGGGCTGGAGCA  |     |     |     |     |     | 389 |
| <i>Pan troglodytes ADIE</i>    | 325 | ACCAGGACTGGGGTGACGGCAGGGCAGGGGGCGCCTGGCCGGGGAGAAAGCGGGGGGCTGGAGCA  |     |     |     |     |     | 389 |
| <i>Pongo abelii ADIE</i>       | 325 | ACCAGGACTGGGGTGACGGCAGGGCAGGGGGCGCCTGGCCGGGGAGAAAGCGGGGGGCTGGAGCA  |     |     |     |     |     | 389 |
| <i>Papio hamadryas ADIE</i>    | 325 | ACCAGGACTGGGGTGACGGCAGGGCAGGGGGCGCCTGGCCGGGGAGAAAGCGGGGGGCTGGAGCA  |     |     |     |     |     | 389 |
| <i>Callithrix jacchus ADIE</i> | 326 | ACCAGGACTGGGAGTGACTGGGGAGGGGGCGCCTGGCCGGGGAGAAAGCGGGGGGCTGGGGCA    |     |     |     |     |     | 390 |
|                                |     | 400                                                                | 410 | 420 | 430 | 440 | 450 |     |
| <i>Homo sapiens ADIE</i>       | 390 | CCACCAACTGGAGGGTCCGGAGTAGCGAGCGCCCGGAAGGAGGCCATCGGGGAGCCGGGAGGGG   |     |     |     |     |     | 453 |
| <i>Pan troglodytes ADIE</i>    | 390 | CCACCAACTGGAGGGTCCGGAGTAGCGAGCGCCCGGAAGGAGGCCATCGGGGAGCCGGGAGGGG   |     |     |     |     |     | 453 |
| <i>Pongo abelii ADIE</i>       | 390 | CCACCAACTGGAGGGTCCGGAGTAGCGAGCGCCCGGAAGGAGGCCATCGGGGAGCCGGGAGGGG   |     |     |     |     |     | 453 |
| <i>Papio hamadryas ADIE</i>    | 390 | CCACCGACTGGAGGGTCCGGAGTAGCGAGCGCCCGGAAGGAGGCCATCGGGGAGCCGGGAGGGG   |     |     |     |     |     | 453 |
| <i>Callithrix jacchus ADIE</i> | 391 | CGGCCTACTGGAGGGTCCGGAGTAGGTAGCGCCCGGAAGGAGGCCATCGGGGAGCCAGGAGG-C   |     |     |     |     |     | 454 |
|                                |     | 460                                                                | 470 | 480 | 490 | 500 | 510 | 520 |
| <i>Homo sapiens ADIE</i>       | 454 | GGGTGAGTCTGGCGGAGGAGGGGAAAGGGGCTGGGGAGGGGACTGTGGGAAAGGCTGGCGCGGGC  |     |     |     |     |     | 518 |
| <i>Pan troglodytes ADIE</i>    | 454 | GGGTGAGTCTGGCGGAGGAGGGGAAAGGGGCTGGGGAGGGGACTGTGGGAAAGGCTGGCGCGGGC  |     |     |     |     |     | 518 |
| <i>Pongo abelii ADIE</i>       | 454 | GGGTGAGTCTGGCGGAGGAGGGGAAAGGGGCTGGGGAGGGGACTGTGGGAAAGGCTGGCGCGGGC  |     |     |     |     |     | 518 |
| <i>Papio hamadryas ADIE</i>    | 454 | GGGTGAGTCTGGCGGAGGAGGGGAAAGGGGCTGGGGAGGGGACTGTGGGAAAGGCTGGCGCGGGC  |     |     |     |     |     | 518 |
| <i>Callithrix jacchus ADIE</i> | 455 | GGGTGAGTCTGGCGGAGGAGGGGAAAGGGGCTGGGGAGGAGACTGTGGGAAAGGCTGGCGCAGGC  |     |     |     |     |     | 519 |
|                                |     | 530                                                                | 540 | 550 | 560 | 570 | 580 |     |
| <i>Homo sapiens ADIE</i>       | 519 | CGGCGGTGGGAGGGAGGGCTGCGCGCTCCACCCTCTCGCCTGCCTGTGCTCTCCGGATGCTC     |     |     |     |     |     | 583 |
| <i>Pan troglodytes ADIE</i>    | 519 | CGGCGGTGGGAGGGAGGGCTGCGCGCTCCACCCTCTCGCCTGCCTGTGCTCTCCGGATGCTC     |     |     |     |     |     | 583 |
| <i>Pongo abelii ADIE</i>       | 519 | CAGCGGTGGGAGGGAGGGCTGCGCGCTCCACCCTCTCGCCTGCCTGTGCTCTCCGGATGCTC     |     |     |     |     |     | 583 |
| <i>Papio hamadryas ADIE</i>    | 519 | CGGCGGTGGGAGGGAGGGCTGCGCGCTCTACCCTCTCGCCTGCCTGTGCTCTCCGGATGCTC     |     |     |     |     |     | 583 |
| <i>Callithrix jacchus ADIE</i> | 520 | CAGCGGTGGGAGGGAAAACTGACCGCTCTACCCTCTCGCCTGCCTGTGCTCTCCGGATGCTC     |     |     |     |     |     | 583 |

|                                |     |                                                        |          |     |     |     |     |     |     |
|--------------------------------|-----|--------------------------------------------------------|----------|-----|-----|-----|-----|-----|-----|
|                                |     | 590                                                    | 600      | 610 | 620 | 630 | 640 | 650 |     |
| <i>Homo sapiens ADIE</i>       | 584 | GGCCCTGCAGCGCTCAGCCTCAGGGGACGGCAGTGGGGTGGGGACCGACTGGGC | CGGCCCGG |     |     |     |     |     | 648 |
| <i>Pan troglodytes ADIE</i>    | 584 | GGCCCTGCAGCGCTCAGCCTCAGGGGACGGCAGTGGGGTGGGGACCGACTGGGC | CGGCCCGG |     |     |     |     |     | 648 |
| <i>Pongo abelii ADIE</i>       | 584 | GGCCCTGCAGCGCTCAGCCTCAGGGGACGGCAGTGGGGTGGGGACCGACTGGGC | CGGCCCGG |     |     |     |     |     | 648 |
| <i>Papio hamadryas ADIE</i>    | 584 | GGCCCTGCAGCGCTCAGCCTCAGGGGACGGCAGTGGGGTGGGGACCGACTGGGC | CGGCCCGG |     |     |     |     |     | 648 |
| <i>Callithrix jacchus ADIE</i> | 584 | GGCTCCGCGGCACTCAGCCTCAGGGGACGGCAGTGGGGTGGGGACCGACTGGGC | CGGCCCGG |     |     |     |     |     | 648 |

|                                |     |                                      |                             |     |     |     |     |     |
|--------------------------------|-----|--------------------------------------|-----------------------------|-----|-----|-----|-----|-----|
|                                |     | 660                                  | 670                         | 680 | 690 | 700 | 710 |     |
| <i>Homo sapiens ADIE</i>       | 649 | GTGGGGACAGAGGCAGGTCCCAGGATTCTGGGTCCC | ACTCCAGTCCTGCTGGTCCACAGACTG |     |     |     |     | 713 |
| <i>Pan troglodytes ADIE</i>    | 649 | GTGGGGACAGAGGCAGGTCCCAGGATTCTGGGTCCC | ACTCCAGTCCTGCTGGTCCACAGACTG |     |     |     |     | 713 |
| <i>Pongo abelii ADIE</i>       | 649 | GTGGGGACAGAGGCAGGTCCCAGGATTCTGGGTCCC | ACTCCAGTCCTGCTGGTCCACAGACTG |     |     |     |     | 713 |
| <i>Papio hamadryas ADIE</i>    | 649 | GTGGGGACAGAGGCAGGTCCCAGGATTCTGGGTCCC | ACTCCAGTCCTGCTGGTCCACAGACTG |     |     |     |     | 713 |
| <i>Callithrix jacchus ADIE</i> | 649 | GTGGGGACAGAGGCAGGTCCCAGGATTCTGGGTCCC | ACTCCAGTCCTGCTGGTCCACAGACTG |     |     |     |     | 713 |

|                                |     |                                         |     |     |     |             |
|--------------------------------|-----|-----------------------------------------|-----|-----|-----|-------------|
|                                |     | 720                                     | 730 | 740 | 750 |             |
| <i>Homo sapiens ADIE</i>       | 714 | CGAGAGGACCCCGGCGTCCGGGCTCCCGGTGCCAGCGCT |     |     |     | 752 (-1 bp) |
| <i>Pan troglodytes ADIE</i>    | 714 | CGAGAGGACCCCGGCGTCCGGGCTCCCGGTGCCAGCGCT |     |     |     | 752 (-1 bp) |
| <i>Pongo abelii ADIE</i>       | 714 | CGAGAGGACCCCGGCGTCCGGGCTCCCGGTGCCAGCGCT |     |     |     | 752 (-1 bp) |
| <i>Papio hamadryas ADIE</i>    | 714 | CGAGAGGACCCCGGCGTCCGGGCTCCCGGTGCCAGCGCT |     |     |     | 752 (-1 bp) |
| <i>Callithrix jacchus ADIE</i> | 714 | CGAGAGGACCCCGGCGTCCGGGCTCCCGGTGCCAGCGC  |     |     |     | 752 (-1 bp) |

# D

|                                  |     |                                                                     |     |         |     |     |     |     |
|----------------------------------|-----|---------------------------------------------------------------------|-----|---------|-----|-----|-----|-----|
|                                  |     | 10                                                                  | 20  | 30      | 40  | 50  | 60  |     |
| <i>Homo sapiens ADIF1</i>        | 1   | TATCGTGATAAAAATTTGATCTGTACGAGAGTCCTGTGAGATAAGTAAGCATTCATCTCTGGTTCA  | 65  |         |     |     |     |     |
| <i>Homo sapiens ADIF2</i>        | 1   | TATTGTGATAAAAATTTGATTTTACAAATAGTCCTGTGAGATAAGTAAGCATTCATCTCTGGTTAA  | 65  |         |     |     |     |     |
| <i>Pan troglodytes ADIF1</i>     | 1   | TATTGTGATAAAAATTTGATCTGTACGAGAGTCCTGTGAGATAAGTAAGCATTCATCTCTGGTTCA  | 65  |         |     |     |     |     |
| <i>Pongo abelii ADIF1</i>        | 1   | TATTGTGATAAAAATTTGATCTTACAAAGAGTCCTGTGAGATAAGTAAGCATTCATCTCTGGTTCA  | 65  |         |     |     |     |     |
| <i>Nomascus leucogenys ADIF1</i> | 1   | TATTGTGATAAAAATTTGATCTTACAAAGAGTCCTGTGAGATAAGTAAGCATTCATCTCTGGTTCA  | 65  |         |     |     |     |     |
|                                  |     |                                                                     |     |         |     |     |     |     |
|                                  |     | 70                                                                  | 80  | 90      | 100 | 110 | 120 | 130 |
| <i>Homo sapiens ADIF1</i>        | 66  | GAAAAGTGATTTCTTCAAAGTGAAATGATGAAAGGAAGAGTATCCTGACCTTAAACTTGGCTTTT   | 130 |         |     |     |     |     |
| <i>Homo sapiens ADIF2</i>        | 66  | GACAAGTGATTTCTTCAAAGTGAAATGATGAAAGGAAGAGTATCCTGACCTTAAACTTGGCTTTT   | 130 |         |     |     |     |     |
| <i>Pan troglodytes ADIF1</i>     | 66  | GAAAAGTGATTTCTTCAAAGTGAAATGATGAAAGGAAGAGTATCCTGACCTTAAACTTGGCTTTT   | 130 |         |     |     |     |     |
| <i>Pongo abelii ADIF1</i>        | 66  | GAAAAGTGATTTCTTCAAAGTGAAATGATGAAAGGAAGAGTATCCTGACCTTAAACTTGGCTTTT   | 130 |         |     |     |     |     |
| <i>Nomascus leucogenys ADIF1</i> | 66  | GAAAAGTGATTTCTTCAAAGTGAAATGATGAAAGGAAGAGTATCCTGACCTTAAACTTGGCTTTT   | 130 |         |     |     |     |     |
|                                  |     |                                                                     |     |         |     |     |     |     |
|                                  |     | 140                                                                 | 150 | 160     | 170 | 180 | 190 |     |
| <i>Homo sapiens ADIF1</i>        | 131 | TTAAATGCCCCGTTCACTTGAAGAGTGGTTCCAATCACAAGTC--TTACCTTCCAAGGACAAATG   | 192 |         |     |     |     |     |
| <i>Homo sapiens ADIF2</i>        | 131 | TTTATTGCCCCGTTCACTTGAAGAGTGGTTCCAATCACAAGTC--TTACCTTCCAAGGACAAATG   | 193 |         |     |     |     |     |
| <i>Pan troglodytes ADIF1</i>     | 131 | TTAAATGCCCCGTTCACTTGAAGAGTGGTTCCAATCACAAGTC--TTACCTTCCAAGGACAAATG   | 192 |         |     |     |     |     |
| <i>Pongo abelii ADIF1</i>        | 131 | TTTATTGCCCCGTTCACTTGAAGAGTGGTTCCAATCACAAGTCCTTTACCTTCCAAGGACAAATG   | 194 |         |     |     |     |     |
| <i>Nomascus leucogenys ADIF1</i> | 131 | TTTATTGCCCCGTTCACTTGAAGAGTGGTTCCAATCACAAGTC--TTACCTTCCAAGGACAAATG   | 192 |         |     |     |     |     |
|                                  |     |                                                                     |     |         |     |     |     |     |
|                                  |     | 200                                                                 | 210 | 220     | 230 | 240 | 250 | 260 |
| <i>Homo sapiens ADIF1</i>        | 193 | TCATTCTGGTTATAATCAGCTTGCTCCCTGCCCTGAGCTTCTGTCCAGTCTGTGCAGGTGTG      | 257 |         |     |     |     |     |
| <i>Homo sapiens ADIF2</i>        | 194 | TCATCCTGGTTATAAACAGCTTGCTCCCTGCCCTGAGCTTCTGTCCAGTCTGTGCAGGTGTG      | 257 |         |     |     |     |     |
| <i>Pan troglodytes ADIF1</i>     | 193 | TCATTCTGGTTATAATCAGCTTGCTCCCTGCCCTGAGCTTCTGTCCAGTCTGTGCAGGTGTG      | 257 |         |     |     |     |     |
| <i>Pongo abelii ADIF1</i>        | 195 | TCATTCTAGTTATAATCAGCTTGCTCCCTGTCCTGAGCTTCTGTCCAGTCTGTGCAGGTGTG      | 259 |         |     |     |     |     |
| <i>Nomascus leucogenys ADIF1</i> | 193 | CTATCCTGGTTATAAACAGCTTGCTCCCTGCCCTGAGCTTCTGTCCAGTCTGTGCAGGTGTG      | 257 |         |     |     |     |     |
|                                  |     |                                                                     |     |         |     |     |     |     |
|                                  |     | 270                                                                 | 280 | 290     | 300 | 310 | 320 |     |
| <i>Homo sapiens ADIF1</i>        | 258 | GGTCTGGGGCAGGGGACAGCTCATCCATTTCCCACTGCACGGAAACAGAGGCTGTGTCCAGGGCC   | 322 |         |     |     |     |     |
| <i>Homo sapiens ADIF2</i>        | 258 | GGTCTGGGGCAGGGGACAGCTCATCCATTTCCCACTGCACAGAAACAGAGGCTGTGTCCAGGGCC   | 322 |         |     |     |     |     |
| <i>Pan troglodytes ADIF1</i>     | 258 | GGTCTGGGGCAGGGGACAGCTCATCCATTTCCCACTGCACGGAAACAGAGGCTGTGTCCAGGGCC   | 322 |         |     |     |     |     |
| <i>Pongo abelii ADIF1</i>        | 260 | GGTCTGGGGCAGGGGACAGCTCATCCATTTCCCACTGCACGAAACAGAGGCTGTGTCCAGGGCC    | 324 |         |     |     |     |     |
| <i>Nomascus leucogenys ADIF1</i> | 258 | GGCCTGGGACAGGGGACAGCTCATCCATTTCCCACTGCACGGAAACAGAGGCTGTGTCCAGGGCC   | 322 |         |     |     |     |     |
|                                  |     |                                                                     |     |         |     |     |     |     |
|                                  |     | 330                                                                 | 340 | 350     | 360 | 370 | 380 | 390 |
| <i>Homo sapiens ADIF1</i>        | 323 | CAGCAACAAAGATTTCTCCTTTGGGTTTCTGTTTCCCTCTTTTCAGTTCAGAGTCTGTCTATCTGAA | 387 |         |     |     |     |     |
| <i>Homo sapiens ADIF2</i>        | 323 | CAGCAACAAAGATTTCTCCTTTGGGTTTCTGTTTCCCTCTTTTCAGTTCAG--TCTGTCTATCTGAA | 385 |         |     |     |     |     |
| <i>Pan troglodytes ADIF1</i>     | 323 | CAGCAACAAAGATTTCTCCTTTGGGTTTCTGTTTCCCTCTTTTCAGTTCAGAGTCTGTCTATCTGAA | 387 |         |     |     |     |     |
| <i>Pongo abelii ADIF1</i>        | 325 | CAGCAACAAAGATTTCTCCTTTGGGTTTCTGTTTCCCTCTTTTCAGTTCAGAGTCTGTCTATCTGAA | 389 |         |     |     |     |     |
| <i>Nomascus leucogenys ADIF1</i> | 323 | CAGCAACAAAGATTTCTCCTTTGGGTTTCTGTTTCCCTCTTTTCAGTTCAGAGTCTGTCTATCTGAA | 387 |         |     |     |     |     |
|                                  |     |                                                                     |     |         |     |     |     |     |
| <i>Homo sapiens ADIF1</i>        | 388 | CC                                                                  | 389 | (-1 bp) |     |     |     |     |
| <i>Homo sapiens ADIF2</i>        | 386 | CC                                                                  | 387 | (-1 bp) |     |     |     |     |
| <i>Pan troglodytes ADIF1</i>     | 388 | CC                                                                  | 389 | (-1 bp) |     |     |     |     |
| <i>Pongo abelii ADIF1</i>        | 390 | CC                                                                  | 391 | (-1 bp) |     |     |     |     |
| <i>Nomascus leucogenys ADIF1</i> | 388 | CC                                                                  | 389 | (-1 bp) |     |     |     |     |

# E

|                                |     |                                                                    |     |     |     |     |     |     |
|--------------------------------|-----|--------------------------------------------------------------------|-----|-----|-----|-----|-----|-----|
|                                |     | 10                                                                 | 20  | 30  | 40  | 50  | 60  |     |
| <i>Homo sapiens ADIG</i>       | 1   | AATGTA AATCTCAAGGTGGTAAAAATAATCTTGATGTTTATCTTTTTCATTTCCAGGTCTAAATT |     |     |     |     |     | 65  |
| <i>Pan troglodytes ADIG</i>    | 1   | AATGTA AATCTCAAGGTGGTAAAAATAATCTTGATGTTTATCTTTTTCATTTCCAGGTCTAAATT |     |     |     |     |     | 65  |
| <i>Pongo abelii ADIG</i>       | 1   | AATGTA AATCTCAAGGTGGTAAAAATAATCTTGATGTTTATCTTTTTCATTTCCAGGTCTAAATT |     |     |     |     |     | 65  |
| <i>Callithrix jacchus ADIG</i> | 1   | AATGCA AATCTCAAGGTGGTAAAAATAATCTTGATGTTTGTCTTTTTCATTTCCAGGTCTAAATT |     |     |     |     |     | 65  |
|                                |     |                                                                    |     |     |     |     |     |     |
|                                |     | 70                                                                 | 80  | 90  | 100 | 110 | 120 | 130 |
| <i>Homo sapiens ADIG</i>       | 66  | TTTTCCTTTAAAAATGCACACTATGTTTGTAAAAAGAAAATGCCATTTTTAAATCCATCATTGATT |     |     |     |     |     | 130 |
| <i>Pan troglodytes ADIG</i>    | 66  | TTTTCCTTTAAAAATGCACACTATGTTTGTAAAAAGAAAATGCCATTTTTAAATCCATCATTGATT |     |     |     |     |     | 130 |
| <i>Pongo abelii ADIG</i>       | 66  | TTTTCCTTTAAAAATGCACACTATGTTTGTAAAAAGAAAATGCCATTTTTAAATCCATCATTGATT |     |     |     |     |     | 130 |
| <i>Callithrix jacchus ADIG</i> | 66  | TTATTCCTTTGAAAAATGTGCTACTTTTGC AA-AAGAAAATGCCATTTTTAAATCCATCATTAT  |     |     |     |     |     | 129 |
|                                |     |                                                                    |     |     |     |     |     |     |
|                                |     | 140                                                                | 150 | 160 | 170 | 180 | 190 |     |
| <i>Homo sapiens ADIG</i>       | 131 | TCTGAAGAATAAAT-----GCAGTGATTTATTTTGAATGTTT TAACCAATTCTTCATCTGCAC   |     |     |     |     |     | 190 |
| <i>Pan troglodytes ADIG</i>    | 131 | TCTGAAGAATAAAT-----GCAGTGATTTATTTTGAATGTTT TAACCAATTCTTCATCTGCAC   |     |     |     |     |     | 190 |
| <i>Pongo abelii ADIG</i>       | 131 | TCTGAAGAATAAAT-----GCAGTGATTTATTTTGAATGTTT TAACCAATTCTTCATCTGCAC   |     |     |     |     |     | 190 |
| <i>Callithrix jacchus ADIG</i> | 130 | TCTGAAGAATAAATACAATGCAGTGCTTTATTTTGAATGTTTCTAACCAATTCTTCATCTGCAC   |     |     |     |     |     | 194 |
|                                |     |                                                                    |     |     |     |     |     |     |
|                                |     | 200                                                                | 210 | 220 | 230 | 240 | 250 |     |
| <i>Homo sapiens ADIG</i>       | 191 | CAACTCCCGTGTAGGGCACTGAGGATTCTATATCAATAATGTGTTGATAATTTTCAATGGAATT   |     |     |     |     |     | 254 |
| <i>Pan troglodytes ADIG</i>    | 191 | CAACTCCCGTGTAGGGCACTGAGGATTCTATATCAATAATGTGTTGATAATTTTCAATGGAATT   |     |     |     |     |     | 254 |
| <i>Pongo abelii ADIG</i>       | 191 | CAACTCCCGTGTAGGGCACTGAGGATTCTATATCAATAATGTGTTAATAATTTTCAATGGAATT   |     |     |     |     |     | 254 |
| <i>Callithrix jacchus ADIG</i> | 195 | CAACTCCCGTGTAGGGCACTGCAGATTCTATATCAATAATGTGTTAATAATTTTCAATGGAATT   |     |     |     |     |     | 258 |
|                                |     |                                                                    |     |     |     |     |     |     |
| <i>Homo sapiens ADIG</i>       |     | (-1 bp)                                                            |     |     |     |     |     |     |
| <i>Pan troglodytes ADIG</i>    |     | (-1 bp)                                                            |     |     |     |     |     |     |
| <i>Pongo abelii ADIG</i>       |     | (-1 bp)                                                            |     |     |     |     |     |     |
| <i>Callithrix jacchus ADIG</i> |     | (-23 bp)                                                           |     |     |     |     |     |     |

# F

|                                 |     |                                                                    |             |     |     |     |     |     |
|---------------------------------|-----|--------------------------------------------------------------------|-------------|-----|-----|-----|-----|-----|
|                                 |     | 10                                                                 | 20          | 30  | 40  | 50  | 60  |     |
| <i>Homo sapiens ADIH</i>        | 1   | GATGATGAATGCCCTCACCCCGAGACCCCTTCGAAGTGTATTCTGGGTAATGACTCCACTCACC   |             |     |     |     |     | 65  |
| <i>Pan troglodytes ADIH</i>     | 1   | GTGATGAATGCCCTCAACCCCGAGACCCCTTCGAAGTGTATTCTGGGTAATGACTCCACTCACC   |             |     |     |     |     | 65  |
| <i>Pongo abelii ADIH</i>        | 1   | GATGATGAATGCCCTCACCCCGAGACCCCTTCGAAGTGTATTCTGGGTAATGACTCCACTCACC   |             |     |     |     |     | 65  |
| <i>Nomascus leucogenys ADIH</i> | 1   | GATGATGAGTGCCTCACCCCGAGACCCCTTCGAAGTGTATTCTGGGTAATGACTCCACTCACC    |             |     |     |     |     | 65  |
| <i>Macaca mulatta ADIH</i>      | 1   | CATGATGAGTGCCTCACCCCGAGACCCCTTCGAAGTGTATTCTGGGTAATGACTCCACTCACC    |             |     |     |     |     | 65  |
|                                 |     |                                                                    |             |     |     |     |     |     |
|                                 |     | 70                                                                 | 80          | 90  | 100 | 110 | 120 | 130 |
| <i>Homo sapiens ADIH</i>        | 66  | AAATATCTCCTCAAGATATGACGACTCTGTCCACATCACATCTACTTGTATGTGATGCAGGAAAG  |             |     |     |     |     | 130 |
| <i>Pan troglodytes ADIH</i>     | 66  | AAATATCTCCTCAAGATATGACGACTCTGTCCACATCACATCTACTTGTATGTGATGCAGGAAAG  |             |     |     |     |     | 130 |
| <i>Pongo abelii ADIH</i>        | 66  | AAATACCTCCTCAAGATATGATGACTCTGTCCACATCACATCTACTTGTATGTGATGCAGGAAAG  |             |     |     |     |     | 130 |
| <i>Nomascus leucogenys ADIH</i> | 66  | AAATACCTCCTCAAGATATGACGACTCTGTCCACATCACATCTACTTGTATGTGATGCAGGAAAG  |             |     |     |     |     | 130 |
| <i>Macaca mulatta ADIH</i>      | 66  | AAATACCTCCTCAAGATATGACGACTCTGTCCACATCACATCTACTTGTATGTGATGCAGGAAAG  |             |     |     |     |     | 130 |
|                                 |     |                                                                    |             |     |     |     |     |     |
|                                 |     | 140                                                                | 150         | 160 | 170 | 180 | 190 |     |
| <i>Homo sapiens ADIH</i>        | 131 | AGCAAGAGACAGAAATCCAACCTGAGTGTATCCCACTGCCTCCTCCTGTGCATCCCCTCTGACCA  |             |     |     |     |     | 195 |
| <i>Pan troglodytes ADIH</i>     | 131 | AGCAAGAGACAGAAATCCAACCTGAGTGTATCCCACTGCCTCCTCCTGTGCATCCCCTCTGACCA  |             |     |     |     |     | 195 |
| <i>Pongo abelii ADIH</i>        | 131 | AGCAAGAGACAGAAATCCAACCTGAGTGTATCCCACTGCCTCCTCCTGTGCATCCCCTCTGACCA  |             |     |     |     |     | 195 |
| <i>Nomascus leucogenys ADIH</i> | 131 | AGCAAGAAACAGCAATCCAACCTGAGTGTATCCCACTGCCTCCTCCTGTGCATCCCCTCTGACCA  |             |     |     |     |     | 195 |
| <i>Macaca mulatta ADIH</i>      | 131 | AGCAAGAGACAGAAATCCAGTGTGAGTGTATCCCACTGCCTCCTCCTGTGCATCCCCTCTGACCA  |             |     |     |     |     | 195 |
|                                 |     |                                                                    |             |     |     |     |     |     |
|                                 |     | 200                                                                | 210         | 220 | 230 | 240 | 250 | 260 |
| <i>Homo sapiens ADIH</i>        | 196 | GCCCCAGGTCAGCTTGGTGGCCACACTCACCTGTTCACAGCTCTCTTGCCTCCCACAGGTAACCAC |             |     |     |     |     | 260 |
| <i>Pan troglodytes ADIH</i>     | 196 | GCCCCAGGTCAGCTTGGTGGCCACACTCACCTGTTCACAGCTCTCTTGCCTCCCACAGGTAACCAC |             |     |     |     |     | 260 |
| <i>Pongo abelii ADIH</i>        | 196 | GCCCCAGGTCAGCTTGGTGGCCACACTCACCTGTTCACAGCTCTCTTGCCTCCCACAGGTAACCAC |             |     |     |     |     | 260 |
| <i>Nomascus leucogenys ADIH</i> | 196 | GCCCCAGGTCAGCTTGGTGGCCACACTCACCTGTTCACAGCTCTCTTGCCTCCCACAGGTAACCAC |             |     |     |     |     | 260 |
| <i>Macaca mulatta ADIH</i>      | 196 | GACCCAGGTCAGCTTGGTGGCCACACTCACCTGTTCACAGCTCTCTTGCCTCCCACAGGTAACCAC |             |     |     |     |     | 260 |
|                                 |     |                                                                    |             |     |     |     |     |     |
| <i>Homo sapiens ADIH</i>        | 261 | C                                                                  | 261 (-1 bp) |     |     |     |     |     |
| <i>Pan troglodytes ADIH</i>     | 261 | C                                                                  | 261 (-1 bp) |     |     |     |     |     |
| <i>Pongo abelii ADIH</i>        | 261 | C                                                                  | 261 (-1 bp) |     |     |     |     |     |
| <i>Nomascus leucogenys ADIH</i> | 261 | C                                                                  | 261 (-1 bp) |     |     |     |     |     |
| <i>Macaca mulatta ADIH</i>      | 261 | C                                                                  | 261 (-1 bp) |     |     |     |     |     |



# G

|                            |     |                                                                    |     |     |     |     |         |     |
|----------------------------|-----|--------------------------------------------------------------------|-----|-----|-----|-----|---------|-----|
|                            |     | 10                                                                 | 20  | 30  | 40  | 50  | 60      |     |
| <i>Homo sapiens ADII</i>   | 1   | TCGTCTTGTGTGCCCCACGTCATGCGCGCGGGGTCCGCGGCTCTCCGACCAGCCCCAGCGGG     |     |     |     |     |         | 65  |
| <i>Pongo abelii ADII</i>   | 1   | TCGTCTTGTGTGCCCCACGTCATGCGCGCGGGGTCCGCGGCTCTCCGACCAGCCCCAGCGGG     |     |     |     |     |         | 65  |
| <i>Macaca mulatta ADII</i> | 1   | TTGTCTTGTGTGCCCCACGTCATGCGCGCGGGGTCCGCGGCTCTCCGACCAGCCCCAGCGGG     |     |     |     |     |         | 65  |
|                            |     | 70                                                                 | 80  | 90  | 100 | 110 | 120     | 130 |
| <i>Homo sapiens ADII</i>   | 66  | TGGGCCCAAGCGTCAGAGGTCCCGGCGCCTCTCGCTGAAGTAGTTGGGTAGCCGGGGCTGGGGGTC |     |     |     |     |         | 130 |
| <i>Pongo abelii ADII</i>   | 66  | TGGGCCCAAGCGTCAGAGGTCCCGGCGCCTCTCGCTGAAGTAGTTGGGTAGCCGGGGCTGGGGGTC |     |     |     |     |         | 130 |
| <i>Macaca mulatta ADII</i> | 66  | TGGGCCCAAGCGTCAGAGGTCCCGGCGCCTCTCGCTGAAGTAGTTGGGTAGCCGGGGCTGGGGGTC |     |     |     |     |         | 130 |
|                            |     | 140                                                                | 150 | 160 | 170 | 180 | 190     |     |
| <i>Homo sapiens ADII</i>   | 131 | GCCACGTCGGGGGCGGGCCAGGACCCGCGGAGCCGGTCCCCGAGCGCGGGAGCGGGGCCGCC     |     |     |     |     |         | 195 |
| <i>Pongo abelii ADII</i>   | 131 | GCCACGTCGGGGGCGGGCCAGGACCCGCGGAGCCGGTCCCCGAGCGCGGGAGCGGGGCCGCC     |     |     |     |     |         | 195 |
| <i>Macaca mulatta ADII</i> | 131 | GCCACGTCGGGGGCGGGCCAGGACCCGCGGAGCCGGTCCCCGAGCA CGGGAGCGGGGCCGCC    |     |     |     |     |         | 195 |
|                            |     | 200                                                                | 210 | 220 | 230 | 240 | 250     | 260 |
| <i>Homo sapiens ADII</i>   | 196 | GCGCCGCCCCACCATTACCTCCCCGGGCGGCAAGGAGGAGCTGGTGGCGGTTCGCCTCCCGGCTGT |     |     |     |     |         | 260 |
| <i>Pongo abelii ADII</i>   | 196 | GCGCCGCCCCACCATTACCTCCCCGGGCGGCAAGGAGGAGCTGGTGGCGGTTCGCCTCCCGGCTGT |     |     |     |     |         | 260 |
| <i>Macaca mulatta ADII</i> | 196 | GCGCCGCCCCACCATTACCTCCCCGGGCGGCAAGGAGGAGCTGGTGGCGGTTCGCCTCCCGGCTGT |     |     |     |     |         | 260 |
|                            |     | 270                                                                | 280 | 290 | 300 | 310 |         |     |
| <i>Homo sapiens ADII</i>   | 261 | GGCAGCGGCGGGCGGCGTGCCTGCCTGGCGGCCGTCGGCGTACTCTTGGCC                |     |     |     | 310 | (-1 bp) |     |
| <i>Pongo abelii ADII</i>   | 261 | GGCAGCGGCGGGCGGCGTGCCTGCCTGGCGGCCGTCGGCGTACTCTTGGCC                |     |     |     | 310 | (-1 bp) |     |
| <i>Macaca mulatta ADII</i> | 261 | GGCAGCGGCGGGCGGCGTGCCTGCCTGGCGGCCGTCGGCGTACTCTTGGCC                |     |     |     | 310 | (-1 bp) |     |

# H

|                             |     |                                                                   |     |     |     |     |     |     |
|-----------------------------|-----|-------------------------------------------------------------------|-----|-----|-----|-----|-----|-----|
|                             |     | 10                                                                | 20  | 30  | 40  | 50  | 60  |     |
| <i>Homo sapiens ADIJ</i>    | 1   | TCCCACATTGTCAGAGTAATGCCAAACTCTCTCTGAGTGGGATGAGCAGAGCAGATGCTGCAATG |     |     |     |     |     | 65  |
| <i>Pan troglodytes ADIJ</i> | 1   | TCCCACATTGTCAGAGTAATGCCAAACTCTCTCTGAGTGGGATGAGCAGAGCAGATGCTGCAATG |     |     |     |     |     | 65  |
| <i>Papio hamadryas ADIJ</i> | 1   | TCCCACATTGTCAGAGTAATGCCAAACTCTCTCTGAGTGGGATGAGCAGAGCAGATGCTGCAATG |     |     |     |     |     | 65  |
|                             |     | 70                                                                | 80  | 90  | 100 | 110 | 120 | 130 |
| <i>Homo sapiens ADIJ</i>    | 66  | AGATGCCAAAGCGGCTCCCTTCTCTGTGCCTTGGGTGCTATAAATTGCTCCGGCGCGGTTT     |     |     |     |     |     | 130 |
| <i>Pan troglodytes ADIJ</i> | 66  | AGATGCCAAAGCGGCTCCCTTCTCTGTGCCTTGGGTGCTATAAATTGCTCCGGCGCGGTTT     |     |     |     |     |     | 130 |
| <i>Papio hamadryas ADIJ</i> | 66  | AGATGCCAAAGCGGCTCCCTTCTCTGTGCCTTGGGTGCTATAAATTGCTCCGGCGCGGTTT     |     |     |     |     |     | 130 |
|                             |     | 140                                                               | 150 | 160 | 170 | 180 | 190 |     |
| <i>Homo sapiens ADIJ</i>    | 131 | GTCAGCCTCCTTCTCTGGCAGTGGTACCAGGCAGAATTCTGCCTTCAGTCTCTCTCTCGC      |     |     |     |     |     | 195 |
| <i>Pan troglodytes ADIJ</i> | 131 | GTCAGCCTCCTTCTCTGGCAGTGGTACCAGGCAGAATTCTGCCTTCAGTCTCTCTCTCGC      |     |     |     |     |     | 195 |
| <i>Papio hamadryas ADIJ</i> | 131 | GTCAGCCTCCTTCTCTGGCAGTGGTACCAGGCAGAATTCTGCCTTCAGTCTCTCTCTCGC      |     |     |     |     |     | 195 |
|                             |     | 200                                                               | 210 | 220 | 230 | 240 | 250 | 260 |
| <i>Homo sapiens ADIJ</i>    | 196 | TCCGCTCCCGCGCGTGAAGCGCTCGCCGCTGCTCGCTCCTCCGCCCCAGGCTCTGAGCCTCG    |     |     |     |     |     | 260 |
| <i>Pan troglodytes ADIJ</i> | 196 | TCCGCTCCCGCGCGTGAAGCGCTCGCCGCTGCTCGCTCCTCCGCCCCAGGCTCTGAGCCTCG    |     |     |     |     |     | 260 |
| <i>Papio hamadryas ADIJ</i> | 196 | TCCGCTCCCGCGCGTGAAGCGCTCGCCGCTGCTCGCTCCTCCGCCCCAGGCTCTGAGCCTCG    |     |     |     |     |     | 260 |
|                             |     | 270                                                               | 280 | 290 | 300 | 310 | 320 |     |
| <i>Homo sapiens ADIJ</i>    | 261 | CCGTGCCGACCGTGCCCGCCGCGCCGCGCTGGGCGCACCCGGGGACGCCCGGGCCACGCGG     |     |     |     |     |     | 325 |
| <i>Pan troglodytes ADIJ</i> | 261 | CCGTGCCGACCGTGCCCGCCGCGCCGCGCTGGGCGCACCCGGGGACGCCCGGGCCACGCGG     |     |     |     |     |     | 325 |
| <i>Papio hamadryas ADIJ</i> | 261 | CCGTGCCGACCGTGCCCGCCGCGCCGCGCTGGGCGCACCCGGGGACGCCCGGGCCACGCGG     |     |     |     |     |     | 325 |
|                             |     | 330                                                               | 340 | 350 | 360 | 370 | 380 | 390 |
| <i>Homo sapiens ADIJ</i>    | 326 | GGCTTTGGGGTGGCGTCTATTTCGAGTGTGGTGGTGGCAAAGGAGGAAGAGAAAAGGAGGCAA   |     |     |     |     |     | 390 |
| <i>Pan troglodytes ADIJ</i> | 326 | GGCTTTGGGGTGGCGTCTATTTCGAGTGTGGTGGTGGCAAAGGAGGAAGAGAAAAGGAGGCAA   |     |     |     |     |     | 390 |
| <i>Papio hamadryas ADIJ</i> | 326 | GGCTTTGGGGTGGCGTCTATTTCGAGTGTGGTGGTGGCAAAGGAGGAAGAGAAAAGGAGGCAA   |     |     |     |     |     | 390 |
|                             |     | 400                                                               | 410 | 420 | 430 | 440 | 450 |     |
| <i>Homo sapiens ADIJ</i>    | 391 | T-AAAAA--AAAAAGGCAGCGGACGGGCGAACTGAGCGAGCGAAAAGAGAGGAGGAGGCAGA    |     |     |     |     |     | 452 |
| <i>Pan troglodytes ADIJ</i> | 391 | TTAAAAA--AAAAAGGCAGCGGACGGGCGAACTGAGCGAGCGAAAAGAGAGGAGGAGGCAGA    |     |     |     |     |     | 455 |
| <i>Papio hamadryas ADIJ</i> | 391 | TTAAAAA--AAAAAGGCAGCGGACGGGCGAACTGAGCGAGCGAAAAGAGAGGAGGAGGCAGA    |     |     |     |     |     | 453 |
|                             |     | 460                                                               | 470 | 480 | 490 | 500 | 510 | 520 |
| <i>Homo sapiens ADIJ</i>    | 453 | AAAAGGCAACTTCAGACGAAAGTTGGTGCGAACAGGGCGAGTCTGCAAAAACGGAAAAGTCGAT  |     |     |     |     |     | 517 |
| <i>Pan troglodytes ADIJ</i> | 456 | AAAAGGCAACTTCAGACGAAAGTTGGTGCGAACAGGGCGAGTCTGCAAAAACGGAAAAGTCGAT  |     |     |     |     |     | 520 |
| <i>Papio hamadryas ADIJ</i> | 454 | AAAAGGCAACTTCAGACGAAAGTTGGTGCGAACAGGGCGAGTCTGCAAAAACGGAAAAGTCGAT  |     |     |     |     |     | 518 |
|                             |     | 530                                                               | 540 | 550 | 560 | 570 | 580 |     |
| <i>Homo sapiens ADIJ</i>    | 518 | CGCAGGCGGCGCGGCATAAAAGTGTGAGCTGCCCGGGCGAGCTCAGGAGGCGCGGCTGGCTCT   |     |     |     |     |     | 582 |
| <i>Pan troglodytes ADIJ</i> | 521 | CGCAGGCGGCGCGGCATAAAAGTGTGAGCTGCCCGGGCGAGCTCAGGAGGCGCGGCTGGCTCT   |     |     |     |     |     | 585 |
| <i>Papio hamadryas ADIJ</i> | 519 | CGCAGGCGGCGCGGCATAAAAGTGTGAGCTGCCCGGGCGAGCTCAGGAGGCGCGGCTGGCTCT   |     |     |     |     |     | 583 |
|                             |     | 590                                                               | 600 | 610 | 620 | 630 | 640 | 650 |
| <i>Homo sapiens ADIJ</i>    | 583 | GCCCTCCCGGTGGCCGCGCGGCGCGGGCTGCAGCCACAGGTGCGAAGGAGCTCGCGGGCGGCGA  |     |     |     |     |     | 647 |
| <i>Pan troglodytes ADIJ</i> | 586 | GCCCTCCCGGTGGCCGCGCGGCGCGGGCTGCAGCCACAGGTGCGAAGGAGCTCGCGGGCGGCGA  |     |     |     |     |     | 650 |
| <i>Papio hamadryas ADIJ</i> | 584 | GCCCTCCCGGTGGCCGCGCGGCGCGGGCTGCAGCCACAGGTGCGAAGGAGCTCGCGGGCGGCGA  |     |     |     |     |     | 648 |
|                             |     | 660                                                               | 670 | 680 | 690 | 700 | 710 |     |
| <i>Homo sapiens ADIJ</i>    | 648 | GGGCGCCCCGCGCACCCCTCCCGCGCCCCACCCCGGGCTCGGGACTTCGGTCAAGTCACTGG    |     |     |     |     |     | 712 |
| <i>Pan troglodytes ADIJ</i> | 651 | GGGCGCCCCGCGCACCCCTCCCGCGCCCCACCCCGGGCTCGGGACTTCGGTCAAGTCACTGG    |     |     |     |     |     | 715 |
| <i>Papio hamadryas ADIJ</i> | 649 | GGGCGCCCCGCGCACCCCTCCCGCGCCCCACCCCGGGCTCGGGACTTCGGTCAAGTCACTGG    |     |     |     |     |     | 713 |
|                             |     | 720                                                               | 730 | 740 | 750 | 760 | 770 | 780 |
| <i>Homo sapiens ADIJ</i>    | 713 | GCGCCCGCGCTCCCTCCCGAGCCGAGCCTCCGCGGGGGAGCAGGAGTCGGCAGCAGCGGCGCG   |     |     |     |     |     | 777 |
| <i>Pan troglodytes ADIJ</i> | 716 | GCGCCCGCGCTCCCTCCCGAGCCGAGCCTCCGCGGGGGAGCAGGAGTCGGCAGCAGCGGTCGG   |     |     |     |     |     | 780 |
| <i>Papio hamadryas ADIJ</i> | 714 | GCGCCCGCGCTCCCTCCCGAGCCGAGCCTCCGCGGGGGAGCAGGAGTCGGCAGCAGCGGCGCG   |     |     |     |     |     | 778 |

|                             |     |       |        |       |        |       |        |             |
|-----------------------------|-----|-------|--------|-------|--------|-------|--------|-------------|
|                             |     | 790   | 800    | 810   | 820    | 830   | 840    |             |
| <i>Homo sapiens ADIJ</i>    | 778 | CGCA  | CGCA   | CGCC  | CAGGG  | GAGTT | TGGGG  | TTCGC       |
| <i>Pan troglodytes ADIJ</i> | 781 | CGCA  | CGCA   | CGCC  | CAGGG  | GAGTT | TGGGG  | TTCGC       |
| <i>Papio hamadryas ADIJ</i> | 779 | CGCA  | CGCA   | CGCC  | CAGGG  | GAGTT | TGGGG  | TTCGC       |
|                             |     |       |        |       |        |       |        | 842         |
|                             |     |       |        |       |        |       |        | 845         |
|                             |     |       |        |       |        |       |        | 843         |
|                             |     | 850   | 860    | 870   | 880    | 890   | 900    | 910         |
| <i>Homo sapiens ADIJ</i>    | 843 | CCAAC | CTTCAA | AATTC | TGTCCA | AAAAG | CAGACA | AAGAG       |
| <i>Pan troglodytes ADIJ</i> | 846 | CCAAC | CTTCAA | AATTC | TGTCCA | AAAAG | CAGACA | AAGAG       |
| <i>Papio hamadryas ADIJ</i> | 844 | CCAAC | CTTCAA | AATTC | TGTCCA | AAAAG | CAGACA | AAGAG       |
|                             |     |       |        |       |        |       |        | 907         |
|                             |     |       |        |       |        |       |        | 910         |
|                             |     |       |        |       |        |       |        | 908         |
|                             |     | 920   | 930    | 940   | 950    |       |        |             |
| <i>Homo sapiens ADIJ</i>    | 908 | CAGC  | AGGAG  | GCCT  | GATCG  | CCG   | CGGG   | CGCT        |
| <i>Pan troglodytes ADIJ</i> | 911 | CAGC  | AGGAG  | GCCT  | GATCG  | CCG   | CGGG   | CGCT        |
| <i>Papio hamadryas ADIJ</i> | 909 | CAGC  | AGGAG  | GCCT  | GATCG  | CCG   | CGGG   | CGCT        |
|                             |     |       |        |       |        |       |        | 950 (-1 bp) |
|                             |     |       |        |       |        |       |        | 953 (-1 bp) |
|                             |     |       |        |       |        |       |        | 951 (-1 bp) |

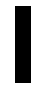

```
      10      20      30      40      50      60
Homo sapiens ADIK      1  CCCGCACCTCCCACTCTGGGCACCAGGGGTGCTCCGCCTCTGGCCGCTTATAGTGGCTCCCGCC 65
Pan troglodytes ADIK  1  CCCGCACCTCCCACTCTGGGCACCAGGGGTGCTCCGCCTCTGGCCGCTTATAGTGGCTCCCGCC 65
Gorilla gorilla ADIK  1  CCCGCACCTCCCACTCTGGGCACCAGGGGTGCTCCGCCTCTGGCCGCTTATAGTGGCTCCCGCC 65
Papio hamadryas ADIK  1  CCCGCGCTTCCCACTCTGGGCACCAGGGGTGCTCCGCCTCTGGCCGCTTATAGTGGCTCCCGCC 65
Callithrix jacchus ADIK 1  CCCGCGCTTCCCACTCTGGGCACCAGGGGTGCTCCGCCTCACTCGCTTATAGTGGCTCTCGCC 65

      70      80      90      100     110     120     130
Homo sapiens ADIK      66  GCGCGGCGCTCATACCAACCCG-----CGCCCGGAGGGAGGGGAGGAAGGTTAGGGAGGCGGA 124
Pan troglodytes ADIK  66  GCGCGGCGCTCATACCAACCCG-----CGCCCGGAGGGAGGGGAGGAAGGTTAGGGAGGCGGA 124
Gorilla gorilla ADIK  66  GCGCGGCGCTCATACCAACCCG-----CGCCCGGAGGGAGGGGAGGAAGGTTAGGGAGGCGGA 124
Papio hamadryas ADIK  66  CCTCGGCGCTCACACCAACCCGCATCGCCGCGCCGGAGGGAGGGGAGGAAGGTTAGGGACGCGGA 130
Callithrix jacchus ADIK 66  TCGCGGCGACTCACACTACCCGCATCGCCGCGCCGGAGGGAGGGGAGGAAGGTTAGGGACGCGGA 130

      140     150     160     170     180     190
Homo sapiens ADIK      125  GAGGGACCGCGCCCGCAGGAGAGAGGCGCGGGCCAGGGCTCTAGCAGGGAAGTGGGCGCGCGGCAG 189
Pan troglodytes ADIK  125  GAGGGACCGCGCCCGCAGGAGAGAGGCGCGGGCCAGGGCTCTAGCAGGGAAGTGGGCGCGCGGCAG 189
Gorilla gorilla ADIK  125  GAGGGACCGCGCCCGCAGGAGAGAGGCGCGGGCCAGGGCTCTAGCAGGGAAGTGGGCGCGCGGCAG 189
Papio hamadryas ADIK  131  GACCGACCGCGCTCGCAGGAGAGAGGCGCGGGCCAGGGCTCTAGCGGGGCTGGGCGCGCGGCAG 195
Callithrix jacchus ADIK 131  GA-----GGAGAGAGGCAAGGGCCAGGGCTCTAGCAGGGAAGTGGGACCGCGGCAG 180

      200     210     220     230     240     250     260
Homo sapiens ADIK      190  GGGTAGCAAGGTGAGTCGGTGCTTGCCAAAGAGGCAGAGCGCAAACCTACTAGGAGATCGCGCC 254
Pan troglodytes ADIK  190  GGGTAGCAAGGTGAGTCGGTGCTTGCCAAAGAGGCAGAGCGCAAACCTACTAGGAGATCGCGCC 254
Gorilla gorilla ADIK  190  GGGTAGCAAGGTGAGTCGGTGCTTGCCAAAGAGGCAGAGCGCAAACCTACTAGGAGATCGCGCC 254
Papio hamadryas ADIK  196  GGGTAGCAAGGTGAGTCGGTGCTTGCCAAAGAGGCAGAGCGCAAACCTACTAGGAGATCGCGCC 260
Callithrix jacchus ADIK 181  GGGTAGCAAGGTGAGTCGGTGCTTGCCCTGAGGCAGAGCGCAAACCTACTAGGAGATCGTGCAC 245

      270     280     290     300     310     320
Homo sapiens ADIK      255  G-GTGAGCAGCACCCGACAGCTCAGAGCCGGGACGTCCGGAGCGCGGGAGCAGTCCCCTCTCCA 318
Pan troglodytes ADIK  255  G-GTGAGCAGCACCCGACAGCTCAGAGCCGGGACGTCCGGAGCGCGGGAGCAGTCCCCTCTCCA 318
Gorilla gorilla ADIK  255  G-GTGAGCAGCACCCGACAGCTCAGAGCCGGGACGTCCGGAGCGCGGGAGCAGTCCCCTCTCCA 318
Papio hamadryas ADIK  261  G-GTGAGCAGCACCCGACAGCTCAGAGCCGGGACGTCCGGAGCGCGGGAGCAGTCCCCTCTCCA 324
Callithrix jacchus ADIK 246  GGTGAGCAGCACCCGACAGCTCAGAGCCGGGACGTCCGGAGCGCGGGAGTAGTCCCGGCTCCA 310

      330     340     350     360     370     380     390
Homo sapiens ADIK      319  TCAGGGAGTGGTCTATCTGGGCAGTCTGGGACCCAGGCACCGCCCATCCCTGAGAGAGCAGCGG 383
Pan troglodytes ADIK  319  TCAGGGAGTGGTCTATCTGGGCAGTCTGGGACCCAGGCACCGCCCATCCCTGAGAGAGCAGCGG 383
Gorilla gorilla ADIK  319  TCAGGGAGTGGTCTATCTGGGCAGTCTGGGACCCAGGCACCGCCCATCCCTGAGAGAGCAGCGG 383
Papio hamadryas ADIK  325  GCGGGGAGCGGTCTATCTGAGCAGCTGGGACCCAGGCACCGCCCATCCCTGAGAAAGCAGCGG 389
Callithrix jacchus ADIK 311  GC AAGAGCGGTCTGCTGGGCAGCTGGGACCCAGGCACCGC--CATCCCTGAGAAAGCGGCAG 373

      400     410     420     430     440     450
Homo sapiens ADIK      384  TCTGGAGAGCAGGCATCTCAGATCCCTAAGAAACCAGCCGTCGAGAAGCCGCGGATCTCAGGTG 448
Pan troglodytes ADIK  384  TCTGGAGAGCAGGCATCTCAGATCCCTAAGAAACCAGCCGTCGAGAAGCCGCGGATCTCAGGTG 448
Gorilla gorilla ADIK  384  TCTGGAGAGCAGGCATCTCAGATCCCTAAGAAACCAGCCGTCGAGAAGCCGCGGATCTCAGGTG 448
Papio hamadryas ADIK  390  TCTGGAGAGCAGGCATCTCAGATCTGTAAGAAACCAGCCGTCGAGAAGCCGCGGATCTCAGGTG 454
Callithrix jacchus ADIK 374  TCTGGAGAGCAGGCATCTCAGATCTGTAAGAAACCAGTCGTCGAGAAGCCGCGGATCTCAGGTG 438

      460     470     480     490     500     510     520
Homo sapiens ADIK      449  CCCAGGATCGTTAGGACTGAAAGGGAGGGTACTAGAGGACCACTGGCTCTGGACCGTCGGGAGCT 513
Pan troglodytes ADIK  449  CCCAGGATCGTTAGGACTGAAAGGGAGGGTACTAGAGGACCACTGGCTCTGGACCGTCGGGAGCT 513
Gorilla gorilla ADIK  449  CCCAGGATCGTTAGGACTGAAAGGGAGGGTACTAGAGGACCACTGGCTCTGGACCGTCGGGAGCT 513
Papio hamadryas ADIK  455  CCCAGGATCGTTAGGACTGAAAGGGAGGGTACTAGAGGACCACTGGCTCTGGATCGTCAGGAGCT 519
Callithrix jacchus ADIK 439  CCCAGGATC--TAGGACTGAAAGGGAGGGTACTAGAGGACCACTGGATCTGGACCGTCGGGAGCT 502

      530     540     550     560     570     580
Homo sapiens ADIK      514  C-CCCCTGACGTAACCACGAGG-GGCCCTCCCCTTGACGGACGGCTT-----GGGAGCGGCACC 571
Pan troglodytes ADIK  514  C-CCCCTGACGTAACCACGAGG-GGCCCTCCCCTTGACGGACGGCTT-----GGGAGCGGCACC 571
Gorilla gorilla ADIK  514  C-CCCCTGACGTAACCACGAGG-GGCCCTCCCCTTGACGGACGGCTT-----GGGAGCGGCACC 571
Papio hamadryas ADIK  520  C-CCCCTGACGTAACCACGAGG-GGCCCTCCCCTTGACGGACGGCTT-----GGGAGCGGCACC 577
Callithrix jacchus ADIK 503  ATCCCCTGACGTAGCCACGGGGGGCCCTCCCCTCGACTGACGGCTCGGCTCGGGAGCGGCATC 567
```

|                                |     |                                                                    |     |     |     |     |     |     |     |
|--------------------------------|-----|--------------------------------------------------------------------|-----|-----|-----|-----|-----|-----|-----|
|                                |     | 590                                                                | 600 | 610 | 620 | 630 | 640 | 650 |     |
| <i>Homo sapiens ADIK</i>       | 572 | GCCGCGGCTGGAGCCCGCAGAGGCAAGGTAAGGGGAGCGGGGGGCAGCCGTCGGGGGAGTGCAGA  |     |     |     |     |     |     | 636 |
| <i>Pan troglodytes ADIK</i>    | 572 | GCCGCGGCTGGAGCCCGCAGAGGCAAGGTAAGGGGAGCGGGGGGCAGCCGTCGGGGGAGTGCAGA  |     |     |     |     |     |     | 636 |
| <i>Gorilla gorilla ADIK</i>    | 572 | GCCGCGGCTGGAGCCCGCAGAGGCAAGGTAAGGGGAGCGGGGGGCAGCCGTCGGGGGAGTGCAGA  |     |     |     |     |     |     | 635 |
| <i>Papio hamadryas ADIK</i>    | 578 | GCCGCGGCGGGGACCCGTAGAGGCAAGGTAAGGGGAGTGGGGGCAGCCGTCGGGGGAGTGCAGA   |     |     |     |     |     |     | 642 |
| <i>Callithrix jacchus ADIK</i> | 568 | GCAAGCGGCGAGG--CCGCAGAGGTAGAGTAGGGGAGCGGG--GGCAGCCGTCGGGGGAGTGCAGA |     |     |     |     |     |     | 629 |

|                                |     |                                                                 |     |     |     |     |     |     |
|--------------------------------|-----|-----------------------------------------------------------------|-----|-----|-----|-----|-----|-----|
|                                |     | 660                                                             | 670 | 680 | 690 | 700 | 710 |     |
| <i>Homo sapiens ADIK</i>       | 637 | CCCAGGCCAAGGCGGGTCACCGCCTCCTG-GCCCGCGGAGAGCCCG-GCCCCGGCAGCCATTG |     |     |     |     |     | 699 |
| <i>Pan troglodytes ADIK</i>    | 637 | CCCAGGCCAAGGCGGGTCACCGCCTCCTG-GCCCGCGGAGAGCCCG-GCCCCGGCAGCCATTG |     |     |     |     |     | 699 |
| <i>Gorilla gorilla ADIK</i>    | 636 | CCCAGGCCAAGGCGGGTCACCGCCTCCTG-GCCCGCGGAGAGCCCG-GCCCCGGCAGCCATTG |     |     |     |     |     | 698 |
| <i>Papio hamadryas ADIK</i>    | 643 | CCCAGGCCAAGGCGGGTCACCGCCTCCTGGGCCCGGAGAGTCCCGGCCCCGGCAGCCATTG   |     |     |     |     |     | 707 |
| <i>Callithrix jacchus ADIK</i> | 630 | CCGCTGCCAAGGCGGGTCACCGCCTCCTGGGCCCGGAGAGCCCGGCCCCGGCAGCCATTG    |     |     |     |     |     | 694 |

|                                |     |                                                                    |     |     |     |     |     |     |     |
|--------------------------------|-----|--------------------------------------------------------------------|-----|-----|-----|-----|-----|-----|-----|
|                                |     | 720                                                                | 730 | 740 | 750 | 760 | 770 | 780 |     |
| <i>Homo sapiens ADIK</i>       | 700 | CGCCCAAGAGTGAGGAAGATTTGCTGGCCCTGGCAAGCGTCGCGGCTGAGCCGCCGCAAGAGGGTG |     |     |     |     |     |     | 764 |
| <i>Pan troglodytes ADIK</i>    | 700 | CGCCCAAGAGTGAGGAAGATTTGCTGGCCCTGGCAAGCGTCGCGGCTGAGCCGCCGCAAGAGGGTG |     |     |     |     |     |     | 764 |
| <i>Gorilla gorilla ADIK</i>    | 699 | CGCCCAAGAGTGAGGAAGATTTGCTGGCCCTGGCAAGCGTCGCGGCTGAGCCGCCGCAAGAGGGTG |     |     |     |     |     |     | 763 |
| <i>Papio hamadryas ADIK</i>    | 708 | CGCCCAAGAGTGAGGAAGATTTGCTGGCCCTGGCAAGCGTCGCGGCTGAGCCGCCGCAAGAGGGTG |     |     |     |     |     |     | 772 |
| <i>Callithrix jacchus ADIK</i> | 695 | CGCCCAAGAGTGAGGAAGATTTGCTGGCCCTGGCAAGCGTCGCGGCTGAGCCGCCGCAAGAGGGTG |     |     |     |     |     |     | 759 |

|                                |     |                          |     |         |
|--------------------------------|-----|--------------------------|-----|---------|
|                                |     | 790                      | 800 |         |
| <i>Homo sapiens ADIK</i>       | 765 | GCGGGCGCGGCCGTCCGAGTGGCC | 788 | (-1 bp) |
| <i>Pan troglodytes ADIK</i>    | 765 | GCGGGCGCGGCCGTCCGAGTGGCC | 788 | (-1 bp) |
| <i>Gorilla gorilla ADIK</i>    | 764 | GCGGGCGCGGCCGTCCGAGTGGCC | 787 | (-1 bp) |
| <i>Papio hamadryas ADIK</i>    | 773 | GCGGGTCCGGCCGTCCGGGTGGCC | 796 | (-1 bp) |
| <i>Callithrix jacchus ADIK</i> | 760 | GCGGGCGCGGCCGTCCGGGTGGCC | 783 | (-1 bp) |

# J

|                                 |     |                                                        |                                       |     |     |     |     |     |
|---------------------------------|-----|--------------------------------------------------------|---------------------------------------|-----|-----|-----|-----|-----|
|                                 |     | 10                                                     | 20                                    | 30  | 40  | 50  | 60  |     |
| <i>Homo sapiens ADIM</i>        | 1   | CCGTTTCTATTTTAAATCAAGAAATATGTCAAAA                     | GAAAGAGGAGCCAGAGACAGCCTTCTCTTAACA     | 65  |     |     |     |     |
| <i>Pan troglodytes ADIM</i>     | 1   | CCGTTTCTATTTTAAATCAAGAAATATGTCAAAA                     | GAAAGAGGAGCCAGAGACAGCCTTCTCTTAACA     | 65  |     |     |     |     |
| <i>Pongo abelii ADIM</i>        | 1   | CCATTTCATTTTAAATCAAGCAATATGTCAAAA                      | GAAAGAGGAGCTGGAGACAGCCTTCTCTTAACA     | 65  |     |     |     |     |
| <i>Nomascus leucogenys ADIM</i> | 1   | CCGTTTCTATTTTAAATCAAGAAATATGTCAAAA                     | GAAAGAGGAGCCAGAGACAGCCTTCTCTTAACA     | 65  |     |     |     |     |
| <i>Papio hamadryas ADIM</i>     | 1   | CCGTTTCTATTTTAAATCAAGAAATATGTCAAAA                     | GAAAGAGGAGCCAGAGACAGCCTTCTCTTAACA     | 65  |     |     |     |     |
| <i>Callithrix jacchus ADIM</i>  | 1   | CCATTTCTATTTTAAATCAAGAAATATGTCAAAAT                    | GAAAGAGTAGCCAGAGATAGATAGCCTTCTTT      | 64  |     |     |     |     |
|                                 |     |                                                        |                                       |     |     |     |     |     |
|                                 |     | 70                                                     | 80                                    | 90  | 100 | 110 | 120 | 130 |
| <i>Homo sapiens ADIM</i>        | 66  | CAAAGCAGGGTGTTCATCTTCATCTGACAATAAGTGACTT               | AGTTAACTTTGATTTAATTTTGGC              | 130 |     |     |     |     |
| <i>Pan troglodytes ADIM</i>     | 66  | CAAAGCAGGGTGTTCATCTTCATCTGACAATAAGTGACTT               | AGTTAACTTTGATTTAATTTTGGC              | 130 |     |     |     |     |
| <i>Pongo abelii ADIM</i>        | 66  | CAAAGCAGGGTGTTCATCTTCATCTGACAATAAGTGACTT               | AGTTAACTTTGATTTAATTTTGGC              | 130 |     |     |     |     |
| <i>Nomascus leucogenys ADIM</i> | 66  | CAAAGCAGGGTGTTCATCTTCATCTGACAATAAGTGACTT               | AGTTAACTTTGATTTAATTTTGGC              | 130 |     |     |     |     |
| <i>Papio hamadryas ADIM</i>     | 66  | CAAAGCAGGGTGTTCATCTTCATCTGACAATAAGTGACTT               | AGTTAACTTTGATTTAATTTTGGC              | 130 |     |     |     |     |
| <i>Callithrix jacchus ADIM</i>  | 65  | TACAGCAGGGTGTTCATCTTCATCTACAGTAGCTGACTT                | AGTTAACTTTGATTTAATTTTGGC              | 129 |     |     |     |     |
|                                 |     |                                                        |                                       |     |     |     |     |     |
|                                 |     | 140                                                    | 150                                   | 160 | 170 | 180 | 190 |     |
| <i>Homo sapiens ADIM</i>        | 131 | TTTGGGAAGTCATGGGAAAAGAAGTAAAGCTGAGG                    | GATGGGAAATACCTTTGCTAAACCCAGA          | 195 |     |     |     |     |
| <i>Pan troglodytes ADIM</i>     | 131 | TTTGGGAAGTCATGGGAAAAGAAGTAAAGCTGAGG                    | GATGGGAAATACCTTTGCTAAACCCAGA          | 195 |     |     |     |     |
| <i>Pongo abelii ADIM</i>        | 131 | TTTGGGAAGTCATGGGAAAAGAAGTAAAGCTGAGG                    | GATGGGAAATACCTTTGCTAAACCCAGA          | 195 |     |     |     |     |
| <i>Nomascus leucogenys ADIM</i> | 131 | TTTGGGAAGTCATGGGAAAAGAAGTAAAGCTGAGG                    | GATGGGAAATACCTTTGCTAAACCCAGA          | 195 |     |     |     |     |
| <i>Papio hamadryas ADIM</i>     | 131 | TTTGGGAAGTCATGGGAAAAGAAGTAAAGCTGAGG                    | GATGGGAAATACCTTTGCTAAACCCAGA          | 195 |     |     |     |     |
| <i>Callithrix jacchus ADIM</i>  | 130 | TTTGGGAAGCCAGGGAAAAGAAGTAAAGCTGAGG                     | GATGGGAAATATGTTTGGCTAAACCCAGA         | 194 |     |     |     |     |
|                                 |     |                                                        |                                       |     |     |     |     |     |
|                                 |     | 200                                                    | 210                                   | 220 | 230 | 240 | 250 | 260 |
| <i>Homo sapiens ADIM</i>        | 196 | GACACTGCACCTGAATCCCTGCTCAGTGT                          | TTTGTAGGCAACCAACTGCCTTCTGCCACTGGTATCC | 260 |     |     |     |     |
| <i>Pan troglodytes ADIM</i>     | 196 | GACACTGCACCTGAATCCCTGCTCAGTGT                          | TTTGTAGGCAACCAACTGCCTTCTGCCACTGGTATCC | 260 |     |     |     |     |
| <i>Pongo abelii ADIM</i>        | 196 | GACACTGCACCTGAATCCCTGCTCAGTGT                          | TTTGTAGGCAACCAACTGCCTTCTGCCACTGGTATCT | 260 |     |     |     |     |
| <i>Nomascus leucogenys ADIM</i> | 196 | GACACTGCACCTGAATCCCTGCTCAGTGT                          | TTTGTAGGCAACCAACTGCCTTCTGCCACTGGTATCC | 260 |     |     |     |     |
| <i>Papio hamadryas ADIM</i>     | 196 | GACACTGCACCTGAATCCCTGCTCAGTGT                          | TTTGTAGGCAACCAACTGCCTTCTGCCACTGGTATCC | 260 |     |     |     |     |
| <i>Callithrix jacchus ADIM</i>  | 195 | AACACTGCACCTGAATCCCTGCTCAGTGT                          | TTTGTAGGCAACCAACTGCCTTCTGCCACTGGTATCC | 259 |     |     |     |     |
|                                 |     |                                                        |                                       |     |     |     |     |     |
|                                 |     | 270                                                    | 280                                   | 290 | 300 | 310 | 320 |     |
| <i>Homo sapiens ADIM</i>        | 261 | GGAAGGGGAAATGAGTTACTCTTAAGTGGGCCAAAGTGGGGAAA           | TACTAACAGTACACTAGAAAC                 | 325 |     |     |     |     |
| <i>Pan troglodytes ADIM</i>     | 261 | GGAAGGGGAAATGAGTTACTCTTAAGTGGGCCAAAGTGGGGAAA           | TACTAACAGTACACTAGAAAC                 | 325 |     |     |     |     |
| <i>Pongo abelii ADIM</i>        | 261 | GGAAGGGGAAATGAGTTACTCTTAAGTGGGCCAAAGTGGGGAAA           | TACTAACAGTACACTAGAAAG                 | 325 |     |     |     |     |
| <i>Nomascus leucogenys ADIM</i> | 261 | GGAAGGGGAAATGAGTTACTCTTAAGTGGGCCAAAGTGGGGAAA           | TACTAACAGTACACTAGAAAG                 | 325 |     |     |     |     |
| <i>Papio hamadryas ADIM</i>     | 261 | GGAAGGGGAAATGAGTTACTCTTAAGTGGGCCAAAGTGGGGAAA           | TACTAACAGTACACTAGAAAG                 | 325 |     |     |     |     |
| <i>Callithrix jacchus ADIM</i>  | 260 | GGAAGGGGAAATGAGTTACTCTTAAGTGGGCCAAAGTGGGGAACT          | TACTAACAGTACACTAGATAG                 | 324 |     |     |     |     |
|                                 |     |                                                        |                                       |     |     |     |     |     |
|                                 |     | 330                                                    | 340                                   | 350 | 360 | 370 | 380 | 390 |
| <i>Homo sapiens ADIM</i>        | 326 | CAAGAGCTGTCTGTGAAAGCCCTGAATGGGTTCCCACTGCT              | TATTTTCAGACAAAACCTGATGCAGTTA          | 390 |     |     |     |     |
| <i>Pan troglodytes ADIM</i>     | 326 | CAAGAGCTGTCTGTGAAAGCCCTGAATGGGTTCCCACTGCT              | TATTTTCAGACAAAACCTGATGCAGTTA          | 390 |     |     |     |     |
| <i>Pongo abelii ADIM</i>        | 326 | CAAGAGCTGTCTGTGAAAGCCCTGAATGGGTTCCCACTGCT              | TATTTTCAGACAAAACCTGATGCAGTTA          | 390 |     |     |     |     |
| <i>Nomascus leucogenys ADIM</i> | 326 | CAAGAGCTGTCTGTGAAAGCCCTGAATGGGTTCCCACTGCT              | TATTTTCAGACAAAACCTGATGCAGTTA          | 390 |     |     |     |     |
| <i>Papio hamadryas ADIM</i>     | 326 | CAAGAGCTGTCTGTGAAAGCCCTGAATGGGTTCCCACTGCT              | TATTTTCAGACAAAACCTGATGCAGTTA          | 390 |     |     |     |     |
| <i>Callithrix jacchus ADIM</i>  | 325 | CAAGAGCTGTCTGTGAAAGCCCTGAATGGGTTCCCACTGCT              | TATTTTCAGACAAAACCTGATGCAGTTA          | 389 |     |     |     |     |
|                                 |     |                                                        |                                       |     |     |     |     |     |
|                                 |     | 400                                                    | 410                                   | 420 | 430 | 440 | 450 |     |
| <i>Homo sapiens ADIM</i>        | 391 | AGCCTGAATTTCCCTGGCAAGCAACAAGGGTAGATTTTTTCCAAAAGGCTTTTT | TAGACTGCAAATACA                       | 455 |     |     |     |     |
| <i>Pan troglodytes ADIM</i>     | 391 | AGCCTGAATTTCCCTGGCAAGCAACAAGGGTAGATTTTTTCCAAAAGGCTTTTT | TAGACTGCAAATACA                       | 455 |     |     |     |     |
| <i>Pongo abelii ADIM</i>        | 391 | AGCCTGAATTTCCCTGGCAAGCAACAAGGGTAGATTTTTTCCAAAAGGCTTTTT | TAGACTGCAAATACA                       | 455 |     |     |     |     |
| <i>Nomascus leucogenys ADIM</i> | 391 | AGCCTGAATTTCCCTGGCAAGCAACAAGGGTAGATTTTTTCCAAAAGGCTTTTT | TAGACTGCAAATACA                       | 455 |     |     |     |     |
| <i>Papio hamadryas ADIM</i>     | 391 | AGCCTGAATTTCCCTGGCAAGCAACAAGGGTAGATTTTTTCCAAAAGGCTTTTT | TAGACTGCAAATACA                       | 455 |     |     |     |     |
| <i>Callithrix jacchus ADIM</i>  | 390 | AGCCTGAATTTCCCTGGCAAGCAACAAGGGTAGATTTTTTCCAAAAGGCTTTTT | TAGACTGCAAATACA                       | 454 |     |     |     |     |
|                                 |     |                                                        |                                       |     |     |     |     |     |
|                                 |     | 460                                                    | 470                                   | 480 | 490 |     |     |     |
| <i>Homo sapiens ADIM</i>        | 456 | CAGCCTTTCCATGTCTAATCACAAAAGCAAACCTGCTGGACAC            | 497 (-1 bp)                           |     |     |     |     |     |
| <i>Pan troglodytes ADIM</i>     | 456 | CAGCCTTTCCATGTCTAATCACAAAAGCAAACCTGCTGGACAC            | 497 (-1 bp)                           |     |     |     |     |     |
| <i>Pongo abelii ADIM</i>        | 456 | CAGCCTTTCCATGTCTAATCACAAAAGCAAACCTGCTGGACAC            | 497 (-132 bp)                         |     |     |     |     |     |
| <i>Nomascus leucogenys ADIM</i> | 456 | CAGCCTTTCCATGTCTAATCACAAAAGCAAACCTGCTGGACAC            | 497 (-1 bp)                           |     |     |     |     |     |
| <i>Papio hamadryas ADIM</i>     | 456 | CAGCCTTTCCATGTCTAATCACAAAAGCAAACCTGCTGGACAC            | 497 (-1 bp)                           |     |     |     |     |     |
| <i>Callithrix jacchus ADIM</i>  | 455 | CAGCCTTTCCATGTCTAATCACAAAAGCAAACCTGCTGGACAC            | 496 (-28 bp)                          |     |     |     |     |     |

# K

|                             |     |                                                                  |             |     |     |     |     |     |
|-----------------------------|-----|------------------------------------------------------------------|-------------|-----|-----|-----|-----|-----|
|                             |     | 10                                                               | 20          | 30  | 40  | 50  | 60  |     |
| <i>Homo sapiens ADIO</i>    | 1   | AGAGTGTAGCAGCCCCTGAGCCTCGGCCTTGGCCTCACCCTGGGCCAGGACCGTCCGTGCCCA  | 65          |     |     |     |     |     |
| <i>Pan troglodytes ADIO</i> | 1   | AGAGTGTAGCAGCCCCTGAGCCTCGGCCTTGGCCTCACCCTGGGCCAGGACCGTCCGTGCCCA  | 65          |     |     |     |     |     |
| <i>Macaca mulatta ADIO</i>  | 1   | AGAGTGCAGCAGCCCCTGAGCCTCGGCCTTGGCCTCACCCTGGGCCAGGACCGTCCAGTCCA   | 65          |     |     |     |     |     |
|                             |     |                                                                  |             |     |     |     |     |     |
|                             |     | 70                                                               | 80          | 90  | 100 | 110 | 120 | 130 |
| <i>Homo sapiens ADIO</i>    | 66  | GGCAGAAGCTCCGCCTCCACTGGCTGTATTCCCAACGGGGCAGGG-----CCGGGCTGCCGTA  | 125         |     |     |     |     |     |
| <i>Pan troglodytes ADIO</i> | 66  | GGCAGAAGCTCCGCCTCCACTGGCTGTATTCCCAACGGGGCAGGG-----CCGGGCTGCTGTA  | 125         |     |     |     |     |     |
| <i>Macaca mulatta ADIO</i>  | 66  | GGCAGAAGCTCCGCCTCCACAGCTGTATTCCCAATAGGGGCAGGGTGGGGCTGGGCCGCCGTA  | 130         |     |     |     |     |     |
|                             |     |                                                                  |             |     |     |     |     |     |
|                             |     | 140                                                              | 150         | 160 | 170 | 180 | 190 |     |
| <i>Homo sapiens ADIO</i>    | 126 | GGGTCTGGGGGCTCCAGCTGGGGCACCTCCTTCTCAGTCCCTCCCCTCTTTCCTCTCCCCAGCC | 190         |     |     |     |     |     |
| <i>Pan troglodytes ADIO</i> | 126 | GGGTCTGGGGGCTCCAGCTGGGGCACCTCCTTCTCAGTCCCTCCCCTCTTTCCTCTCCCCAGCC | 190         |     |     |     |     |     |
| <i>Macaca mulatta ADIO</i>  | 131 | GGGTCTGGGGGCTCCAGCTGGGGGCCTCCTTCTAAGTCCCTCCCCTCTTTCCTCTCCCCAGCC  | 195         |     |     |     |     |     |
|                             |     |                                                                  |             |     |     |     |     |     |
|                             |     | 200                                                              |             |     |     |     |     |     |
| <i>Homo sapiens ADIO</i>    | 191 | CTGGCCAAG                                                        | 199 (-1 bp) |     |     |     |     |     |
| <i>Pan troglodytes ADIO</i> | 191 | CTGGCCAAG                                                        | 199 (-1 bp) |     |     |     |     |     |
| <i>Macaca mulatta ADIO</i>  | 196 | CTGGCCGAG                                                        | 204 (-1 bp) |     |     |     |     |     |

L

|                                 |   |                                                                  |    |    |    |    |    |  |
|---------------------------------|---|------------------------------------------------------------------|----|----|----|----|----|--|
|                                 |   | 10                                                               | 20 | 30 | 40 | 50 | 60 |  |
| <i>Homo sapiens ADIQ</i>        | 1 | TAAGCACTTTAGCTCAGGGTGGACTCAGGGCTGCCTCCCCCTCCTGAGCAACCTAGGGGCTCCT | 65 |    |    |    |    |  |
| <i>Pan troglodytes ADIQ</i>     | 1 | TAAGCGCTTTAGCTCAGGGTGGACTCAGGGCTGCCTCCCCCTCCTGAGCAACCTAGGGGCTCCT | 65 |    |    |    |    |  |
| <i>Pongo abelii ADIQ</i>        | 1 | TAAGCACTTTAGCTCAGGGTGGACTCAGGGCTGCCTCCCCCTCCTGAGCAACCTAGGGGCTCCT | 65 |    |    |    |    |  |
| <i>Nomascus leucogenys ADIQ</i> | 1 | TAAGCACTTTAGCTCAGGGTGGACTCAGGGCTGCCTCCCCCTCCTGAGCAACCTAGGGGCTCCT | 65 |    |    |    |    |  |
| <i>Macaca mulatta ADIQ</i>      | 1 | TCAGCACTTTAGCTCAGGGTGGACTCAGGGCTGCCTCCCCCTCCTGAGCAACCTAGGGGCTCCT | 65 |    |    |    |    |  |

|                                 |    |                                                                   |     |    |     |     |     |     |
|---------------------------------|----|-------------------------------------------------------------------|-----|----|-----|-----|-----|-----|
|                                 |    | 70                                                                | 80  | 90 | 100 | 110 | 120 | 130 |
| <i>Homo sapiens ADIQ</i>        | 66 | GTGCCCCATGCCTGTGTCCAATTCCCAATCATCAGGGGGCCTCAGACTCCTGCCTGCTCTGACTT | 130 |    |     |     |     |     |
| <i>Pan troglodytes ADIQ</i>     | 66 | GTGCCCCATTCCGTGTCCAATTCCCAATCATCAGGGGGCCTCAGACTCCTGCCTGCTCTGACTT  | 130 |    |     |     |     |     |
| <i>Pongo abelii ADIQ</i>        | 66 | GTGCCCCATGCCTGTGTCCAATTCCCAATCATCAGGGGGCCTCAGACTCCTGCCTGCTCTGACTT | 130 |    |     |     |     |     |
| <i>Nomascus leucogenys ADIQ</i> | 66 | GTGCCCCATCCCTGTGTCCAATTCCCAATCATCAGGGGGCCTCAGACTCCTGCCTGCTCTGACTT | 130 |    |     |     |     |     |
| <i>Macaca mulatta ADIQ</i>      | 66 | CTGCCCCATCTGTGTCCAATTCCCAATCATCAGGGAGCCTCAGACTCCTGCCTGCTCTGACTT   | 130 |    |     |     |     |     |

|                                 |     |                                                                   |     |     |     |     |     |  |
|---------------------------------|-----|-------------------------------------------------------------------|-----|-----|-----|-----|-----|--|
|                                 |     | 140                                                               | 150 | 160 | 170 | 180 | 190 |  |
| <i>Homo sapiens ADIQ</i>        | 131 | TCTAGGCCTTTGAATCAAGCAAGACCCCACTGGATCACCAAAGAGTTAAGCAAAGGAAATCCCTG | 195 |     |     |     |     |  |
| <i>Pan troglodytes ADIQ</i>     | 131 | TCTAGGCCTTTCAATCAAACAAGACCCCACTGGATCACCAAAGAGTTAAGCAAAGGAAATCCCTG | 195 |     |     |     |     |  |
| <i>Pongo abelii ADIQ</i>        | 131 | TCTAGGCCTTTGAATCAAACAAGACCCCACTGGATCACCAAAGAGTTAAGCAAAGGAAATCCCTG | 195 |     |     |     |     |  |
| <i>Nomascus leucogenys ADIQ</i> | 131 | TCTAGGCCTTTGAATCAAGCAAGACCCCACTGGATCACCAAAGAGTTAAGCAAAGGAAATCCCTG | 195 |     |     |     |     |  |
| <i>Macaca mulatta ADIQ</i>      | 131 | TCTAGGCCTTTGAATCAAACAAGACCCCACTGGATCACCAAAGAGTTAAGCAAAGGAAAGCTCTG | 195 |     |     |     |     |  |

|                                 |     |                                                                  |     |     |     |     |     |     |
|---------------------------------|-----|------------------------------------------------------------------|-----|-----|-----|-----|-----|-----|
|                                 |     | 200                                                              | 210 | 220 | 230 | 240 | 250 | 260 |
| <i>Homo sapiens ADIQ</i>        | 196 | CCTCCCTTTATCTCCGAGAACCCAGAGGCTGAAAGGGAGGGAGCAGGGAGGAGGGGAAGTGGGA | 260 |     |     |     |     |     |
| <i>Pan troglodytes ADIQ</i>     | 196 | CCTCCCTTTATCTCCGAGAACCCAGAGGCTGAAAGGGAGGGAGCAGGGAGGAGGGGAAGTGGGA | 260 |     |     |     |     |     |
| <i>Pongo abelii ADIQ</i>        | 196 | CCTCCCTTTATCTCCGAGAACCCAGAGGCTGAAAGGGAGGGAGCAGGGAGGAGGGGAAGTGGGA | 260 |     |     |     |     |     |
| <i>Nomascus leucogenys ADIQ</i> | 196 | CCTCCCTTTATCTCCGAGAACCCAGAGGCTGAAAGGGAGGGAGCAGGGAGGAGGGGAAGTGGGA | 260 |     |     |     |     |     |
| <i>Macaca mulatta ADIQ</i>      | 196 | CCTCCCTTTATCTCCGAGAACCCAGAGGCTGAAAGGGAGGGAGCAGGGAGGAGGGGAAGTGGGA | 260 |     |     |     |     |     |

|                                 |     |                                                                  |     |     |     |     |     |  |
|---------------------------------|-----|------------------------------------------------------------------|-----|-----|-----|-----|-----|--|
|                                 |     | 270                                                              | 280 | 290 | 300 | 310 | 320 |  |
| <i>Homo sapiens ADIQ</i>        | 261 | AGCGGCTCTGCCCTCTCCCTCCGCCCTCCCTCCGCCCTCTCTCCCTCCATCCCCTCTCTCTCCC | 325 |     |     |     |     |  |
| <i>Pan troglodytes ADIQ</i>     | 261 | AGCGGCTCTGCCCTCTCCCTCCGCCCTCCCTCCGCCCTCTCTCCCTCCATCCCCTCTCTCTCCC | 325 |     |     |     |     |  |
| <i>Pongo abelii ADIQ</i>        | 261 | AGCGGCTCTGCCCTCTCCCTCCGCCCTCCCTCCGCCCTCTCTCCCTCCATCCCCTCTCTCTCCC | 325 |     |     |     |     |  |
| <i>Nomascus leucogenys ADIQ</i> | 261 | AGCGGCTCTGCCCTCTCCCTCCGCCCTCCCTCCGCCCTCTCTCCCTCCATCCCCTCTCTCTCCC | 325 |     |     |     |     |  |
| <i>Macaca mulatta ADIQ</i>      | 261 | AGCGGCTCTGCCCTCTCCCTCCGCCCTCCCTCCGCCCTCTCTCCCTCCATCCCCTCTCTCTCCC | 325 |     |     |     |     |  |

|                                 |     |                                                                     |     |     |     |     |     |     |
|---------------------------------|-----|---------------------------------------------------------------------|-----|-----|-----|-----|-----|-----|
|                                 |     | 330                                                                 | 340 | 350 | 360 | 370 | 380 | 390 |
| <i>Homo sapiens ADIQ</i>        | 326 | TCCTCTGCTGGGCCTGGGGGTCTGGGCCAGCAACAAGTTAGTATTGCAGACATGGGCCAAGGAGC   | 390 |     |     |     |     |     |
| <i>Pan troglodytes ADIQ</i>     | 326 | TCCTCTGCTGGGCCTGGGGGTCTGGGCCAGCAACAAGTTAGTATTGCAGACATGGGCCAAGGAGC   | 390 |     |     |     |     |     |
| <i>Pongo abelii ADIQ</i>        | 326 | TCCTCTGCTGGGCCTGGGGGTCTGGGCCAGCAACAAGTTAGTATTGCAGACATGGGCCAAGGAGC   | 390 |     |     |     |     |     |
| <i>Nomascus leucogenys ADIQ</i> | 326 | TCCTCTGCTGGGCCTGGGGGTCTGGGCCAGCAACAAGTTAGTATTGCAGACATGGGCCAAGGAGC   | 390 |     |     |     |     |     |
| <i>Macaca mulatta ADIQ</i>      | 326 | TCCTCTGCTGGGCCTGGGGGTCTGGGCCAGCAACA-----TAGTATTGCAGACATGGGCCAAGGAGC | 386 |     |     |     |     |     |

|                                 |     |          |     |         |
|---------------------------------|-----|----------|-----|---------|
| <i>Homo sapiens ADIQ</i>        | 391 | CAGAGGCC | 398 | (-1 bp) |
| <i>Pan troglodytes ADIQ</i>     | 391 | CAGAGGCC | 398 | (-1 bp) |
| <i>Pongo abelii ADIQ</i>        | 391 | CAGAGGCC | 398 | (-1 bp) |
| <i>Nomascus leucogenys ADIQ</i> | 391 | CAGAGGCC | 398 | (-1 bp) |
| <i>Macaca mulatta ADIQ</i>      | 387 | CAGAGGCC | 394 | (-1 bp) |



# M

|                                 |   |             |              |                     |                   |      |            |    |
|---------------------------------|---|-------------|--------------|---------------------|-------------------|------|------------|----|
|                                 |   | 10          | 20           | 30                  | 40                | 50   | 60         |    |
| <i>Homo sapiens ADIR</i>        | 1 | AGAGTA-TG   | TAAAAACCTATT | ACCAGAAAAATCTAGAAA  | AGTATAATCTAGCTATA | ---  | TATTGC     | 61 |
| <i>Pan troglodytes ADIR</i>     | 1 | AGAGTA-TG   | TAAAAACCTATT | ACCAGAAAAATCTAGAAA  | AGTATAATCTAGCTATA | ---  | TATTGC     | 61 |
| <i>Pongo abelii ADIR</i>        | 1 | AGAGTATTG   | TAAAAACCTAGT | GCCAGAAAAATCTAGAAA  | AGTATAATCTAGCTATA | ---  | TATTGC     | 62 |
| <i>Nomascus leucogenys ADIR</i> | 1 | AGGGTATTG   | TAAAAACCTATT | TGTCAGAAAAATCTAGAAA | AGTATAATCTAGCTATA | ---  | TATTGC     | 62 |
| <i>Macaca mulatta ADIR</i>      | 1 | AGAGTATTG   | TAAAAACCTATT | TGCCAGAAAAATCTAGAAA | AGTATAATCTAGCTATA | ---  | TATTGC     | 62 |
| <i>Papio hamadryas ADIR</i>     | 1 | AGAGTATTG   | TAAAAACCTATT | TGCCAGAAAAATCTAGAAA | AGTATAATCTAGCTATA | ---  | TATTGC     | 62 |
| <i>Callithrix jacchus ADIR</i>  | 1 | AGAGTATTATA | AAAAACCTATT  | TGCCAGAAAAATCTAGAAA | AGTATAATCTAGCTATA | ---  | TATTGC     | 62 |
| <i>Tarsius syrichta ADIR</i>    | 1 | ATAGTATTATA | AAAAACCIATTA | CTAAAAAATCTAGAAA    | AGTATAATCTAGCTATA | CTTT | TATTGC     | 65 |
| <i>Otolemur garnettii ADIR</i>  | 1 | ATAGTATTATA | AAAAACCCGAT  | TGCCAGAAAAATCTAGAAA | AGTATAATCTAGCTATA | CTTT | ACGGTATTGC | 65 |

|                                 |    |            |               |           |              |     |              |              |     |
|---------------------------------|----|------------|---------------|-----------|--------------|-----|--------------|--------------|-----|
|                                 |    | 70         | 80            | 90        | 100          | 110 | 120          | 130          |     |
| <i>Homo sapiens ADIR</i>        | 62 | TTTIGTTTTG | GAAATTTACTATA | AAAAATGTA | TCTTTGCTG    | --- | TTTCAGTAGCCG | ACTAATGTTAAA | 124 |
| <i>Pan troglodytes ADIR</i>     | 62 | TTTIGTTTTG | GAAATTTACTATA | AAAAATGTA | TCTTTGCTG    | --- | TTTCAGTAGCCG | ACTAATGTTAAA | 124 |
| <i>Pongo abelii ADIR</i>        | 63 | TTTIGTTTTG | GAAATTTACTATA | AAAAATGTA | TCTTTGCTG    | --- | TTTCAGTAGCCG | ACTAATGTTAAA | 125 |
| <i>Nomascus leucogenys ADIR</i> | 63 | TTTIGTTTTG | GAAATTTACTATA | AAAAATGTA | TCTTTGCTA    | --- | TTTCAGTAGCCA | ACTAATGTTAAA | 125 |
| <i>Macaca mulatta ADIR</i>      | 63 | TTTIGTTTTG | GAAATTTACTG   | AAAAATGTA | TCTTTGCTG    | --- | TTTCAGTAGCCG | ACTAATGTTAAA | 125 |
| <i>Papio hamadryas ADIR</i>     | 63 | TTTIGTTTTG | GAAATTTACTG   | AAAAATGTA | TCTTTGCTG    | --- | TTTCAGTAGCCG | ACTAATGTTAAA | 125 |
| <i>Callithrix jacchus ADIR</i>  | 63 | TTTIGTTTTG | GAAATTTACTATA | AAAAATGTA | TCTTTGCTG    | --- | TTTCAGTAGCCG | ACTAATGTTAAA | 125 |
| <i>Tarsius syrichta ADIR</i>    | 66 | TTT-GTTAT  | GGAATTTACTATA | AAAAATGTA | TCTCTATCTG   | --- | TTTCAGTAGCCA | ACTAATGTTAAA | 127 |
| <i>Otolemur garnettii ADIR</i>  | 66 | TTTIGTTTTG | GAAATTTACTATA | AAAAATGTA | TCTTTATCTGTG | --- | TTTCAGTAGCCG | ACTAATGTTAAA | 130 |

|                                 |     |             |              |               |                |                   |     |     |
|---------------------------------|-----|-------------|--------------|---------------|----------------|-------------------|-----|-----|
|                                 |     | 140         | 150          | 160           | 170            | 180               | 190 |     |
| <i>Homo sapiens ADIR</i>        | 125 | TATTGTGTTCA | AAGCTAACTGCT | TTCATTATGAGAA | ACTCACTGTTGCTA | ATAAAAACAGCAGGGTG |     | 189 |
| <i>Pan troglodytes ADIR</i>     | 125 | TATTGTGTTCA | AAGCTAACTGCT | TTCATTATGAGAA | ACTCACTGTTGCTA | ATAAAAACAGCAGGGTG |     | 189 |
| <i>Pongo abelii ADIR</i>        | 126 | TATTGTGTTCA | AAGCTAACTGCT | TTCATTATGAGAA | ACTCACTGTTGCTA | ATAAAAACAGCAGGGTG |     | 190 |
| <i>Nomascus leucogenys ADIR</i> | 126 | TATTGTGTTCA | AAGCTAACTGCT | TTCATTATGAGAA | ACTCACTGTTGCTA | ATAAAAACAGCAGGGTG |     | 190 |
| <i>Macaca mulatta ADIR</i>      | 126 | TATTGTGTTCA | AAGCTAACTGCT | TTCATTATGAGAA | ACTCACTGTTGCTA | ATAAAAACAGCAGGGTG |     | 190 |
| <i>Papio hamadryas ADIR</i>     | 126 | TATTGTGTTCA | AAGCTAACTGCT | TTCATTATGAGAA | ACTCACTGTTGCTA | ATAAAAACAGCAGGGTG |     | 190 |
| <i>Callithrix jacchus ADIR</i>  | 126 | TATTGTGTTCA | AAGCTAACTGCT | TTCATTATGAGAA | ACTCACTGTTGCTA | ATAAAAACAGCAGGGTG |     | 190 |
| <i>Tarsius syrichta ADIR</i>    | 128 | TATTGTGTTCA | AAGCTAACTGCT | TTCATTATGAGAA | ACTCACTGTTGCTA | ATAAAAACAGCAGGGTG |     | 192 |
| <i>Otolemur garnettii ADIR</i>  | 131 | TATTGTGTTCA | AAGCTAACTA   | TTCATTATGAGAA | ACTCACTGTTGCTA | ATAAAAACAGCAGGGTG |     | 195 |

|                                 |     |             |                |                 |                   |            |     |     |
|---------------------------------|-----|-------------|----------------|-----------------|-------------------|------------|-----|-----|
|                                 |     | 200         | 210            | 220             | 230               | 240        | 250 | 260 |
| <i>Homo sapiens ADIR</i>        | 190 | GAGTGATTCTT | TCTCAGGTGAGCAG | CCCAGAAAAGAGACA | ACGAAACCTTTAACAGT | GGTGACTCTG |     | 254 |
| <i>Pan troglodytes ADIR</i>     | 190 | GAGTGATTCTT | TCTCAGGTGAGCAG | CCCAGAAAAGAGACA | ACGAAACCTTTAACAGT | GGTGACTCTG |     | 254 |
| <i>Pongo abelii ADIR</i>        | 191 | GAGTGATTCTT | TCTCAGGTGAGCAG | CCCAGAAAAGAGACA | ACGAAACCTTTAACAGT | GGTGACTCTG |     | 255 |
| <i>Nomascus leucogenys ADIR</i> | 191 | GAGTGATTCTT | TCTCAGGTGAGCAG | CCCAGAAAAGAGACA | ACGAAACCTTTAACAGT | GGTGACTCTG |     | 255 |
| <i>Macaca mulatta ADIR</i>      | 191 | GAGTGATTCTT | TCTCAGGTGAGCAG | CCCAGAAAAGAGACA | ACGAAACCTTTAACAGT | GGTGACTCTG |     | 255 |
| <i>Papio hamadryas ADIR</i>     | 191 | GAGTGATTCTT | TCTCAGGTGAGCAG | CCCAGAAAAGAGACA | ACGAAACCTTTAACAGT | GGTGACTCTG |     | 255 |
| <i>Callithrix jacchus ADIR</i>  | 191 | GAGTGATTCTT | TCTCAGGTGAGCAG | CCCAGAAAAGAGACA | ACGAAACCTTTAACAGT | GGTGACTCTG |     | 255 |
| <i>Tarsius syrichta ADIR</i>    | 193 | GAGTGATTCTT | TCTCAGGTGAGCAG | CCCAGAAAAGAGACA | ACGAAACCTTTAACAGT | GGTGACTCTG |     | 257 |
| <i>Otolemur garnettii ADIR</i>  | 196 | GAGTGATTCTT | TCTCAGGTGAGCAG | CCCAGAAAAGAGACA | ACGAAACCTTTAACAGT | GGTGACTCTG |     | 260 |

|                                 |     |              |          |             |
|---------------------------------|-----|--------------|----------|-------------|
|                                 |     | 270          | 280      |             |
| <i>Homo sapiens ADIR</i>        | 255 | GACAAGGAGACT | CCCGTAGC | 274 (-1 bp) |
| <i>Pan troglodytes ADIR</i>     | 255 | GACAAGGAGACT | CCCGTAGC | 274 (-1 bp) |
| <i>Pongo abelii ADIR</i>        | 256 | GACAAGGAGACT | CCCGTAGC | 275 (-1 bp) |
| <i>Nomascus leucogenys ADIR</i> | 256 | GACAAGGAGACT | CCCGTAGC | 275 (-1 bp) |
| <i>Macaca mulatta ADIR</i>      | 256 | GACAAGGAGACT | CCCGTAGC | 275 (-1 bp) |
| <i>Papio hamadryas ADIR</i>     | 256 | GACAAGGAGACT | CCCGTAGC | 275 (-1 bp) |
| <i>Callithrix jacchus ADIR</i>  | 256 | GACAAGGAGACT | CCCGTAGC | 275 (-1 bp) |
| <i>Tarsius syrichta ADIR</i>    | 258 | GACAAGGAGACT | CCCGCAGC | 277 (-1 bp) |
| <i>Otolemur garnettii ADIR</i>  | 261 | GACAAGGAGACT | CCCGTAGC | 280 (-1 bp) |
