# Supplementary material for: Comparative genomic analysis of eutherian adiponectin genes
Source: PubMed Central journal article supplement (PMC6040601; doi:10.1016/j.heliyon.2018.e00647), 2018-06-06
Supplement: mmc4.pdf [file mmc4.pdf]

**Supplementary data file 4:** Pairwise nucleotide sequence identity patterns of eutherian adiponectin genes.

| Cluster     | $\bar{a}$    | $a_{\max}$   | $a_{\min}$   | $\bar{a}_{\text{ad}}$ | $\bar{a}$    | $a_{\max}$   | $a_{\min}$   | $\bar{a}_{\text{ad}}$ | $\bar{a}$    | $a_{\max}$   | $a_{\min}$   | $\bar{a}_{\text{ad}}$ | $\bar{a}$    | $a_{\max}$   | $a_{\min}$   | $\bar{a}_{\text{ad}}$ | $\bar{a}$   | $a_{\max}$   | $a_{\min}$   | $\bar{a}_{\text{ad}}$ |  |
|-------------|--------------|--------------|--------------|-----------------------|--------------|--------------|--------------|-----------------------|--------------|--------------|--------------|-----------------------|--------------|--------------|--------------|-----------------------|-------------|--------------|--------------|-----------------------|--|
|             | <i>ADIA</i>  |              |              |                       | <i>ADIB</i>  |              |              |                       | <i>ADIC</i>  |              |              |                       | <i>ADID</i>  |              |              |                       | <i>ADIE</i> |              |              |                       |  |
| <i>ADIA</i> | <b>0,786</b> | <b>0,956</b> | <b>0,645</b> | <b>0,042</b>          |              |              |              |                       |              |              |              |                       |              |              |              |                       |             |              |              |                       |  |
| <i>ADIB</i> | 0,489        | 0,536        | 0,396        | 0,03                  | <b>0,775</b> | <b>0,993</b> | <b>0,633</b> | <b>0,077</b>          |              |              |              |                       |              |              |              |                       |             |              |              |                       |  |
| <i>ADIC</i> | 0,465        | 0,517        | 0,399        | 0,021                 | 0,431        | 0,479        | 0,367        | 0,025                 | <b>0,759</b> | <b>0,991</b> | <b>0,635</b> | <b>0,055</b>          |              |              |              |                       |             |              |              |                       |  |
| <i>ADID</i> | 0,345        | 0,38         | 0,295        | 0,019                 | 0,349        | 0,389        | 0,296        | 0,019                 | 0,32         | 0,355        | 0,274        | 0,015                 | <b>0,787</b> | <b>0,995</b> | <b>0,641</b> | <b>0,052</b>          |             |              |              |                       |  |
| <i>ADIE</i> | 0,338        | 0,356        | 0,299        | 0,012                 | 0,325        | 0,353        | 0,277        | 0,015                 | 0,307        | 0,337        | 0,27         | 0,011                 | 0,369        | 0,404        | 0,309        | 0,019                 | <b>0,91</b> | <b>0,995</b> | <b>0,848</b> | <b>0,045</b>          |  |
| <i>ADIF</i> | 0,301        | 0,323        | 0,275        | 0,008                 | 0,292        | 0,324        | 0,251        | 0,013                 | 0,294        | 0,319        | 0,257        | 0,01                  | 0,329        | 0,355        | 0,282        | 0,014                 | 0,294       | 0,315        | 0,272        | 0,008                 |  |
| <i>ADIG</i> | 0,322        | 0,361        | 0,288        | 0,02                  | 0,306        | 0,353        | 0,271        | 0,018                 | 0,316        | 0,358        | 0,279        | 0,017                 | 0,356        | 0,406        | 0,317        | 0,017                 | 0,344       | 0,387        | 0,313        | 0,026                 |  |
| <i>ADIH</i> | 0,341        | 0,37         | 0,28         | 0,014                 | 0,347        | 0,374        | 0,295        | 0,017                 | 0,35         | 0,379        | 0,295        | 0,014                 | 0,376        | 0,415        | 0,316        | 0,018                 | 0,379       | 0,4          | 0,312        | 0,014                 |  |
| <i>ADII</i> | 0,229        | 0,248        | 0,203        | 0,008                 | 0,215        | 0,235        | 0,19         | 0,009                 | 0,196        | 0,208        | 0,18         | 0,006                 | 0,222        | 0,242        | 0,194        | 0,008                 | 0,246       | 0,26         | 0,226        | 0,007                 |  |
| <i>ADIJ</i> | 0,252        | 0,27         | 0,224        | 0,009                 | 0,229        | 0,249        | 0,201        | 0,01                  | 0,224        | 0,239        | 0,204        | 0,007                 | 0,256        | 0,279        | 0,222        | 0,012                 | 0,272       | 0,283        | 0,263        | 0,004                 |  |
| <i>ADIK</i> | 0,243        | 0,268        | 0,197        | 0,012                 | 0,231        | 0,25         | 0,194        | 0,011                 | 0,217        | 0,239        | 0,195        | 0,008                 | 0,247        | 0,268        | 0,21         | 0,011                 | 0,278       | 0,292        | 0,262        | 0,006                 |  |
| <i>ADIL</i> | 0,26         | 0,278        | 0,227        | 0,009                 | 0,224        | 0,24         | 0,201        | 0,009                 | 0,225        | 0,234        | 0,213        | 0,006                 | 0,258        | 0,277        | 0,223        | 0,011                 | 0,283       | 0,291        | 0,271        | 0,005                 |  |
| <i>ADIM</i> | 0,257        | 0,322        | 0,211        | 0,026                 | 0,256        | 0,317        | 0,221        | 0,023                 | 0,248        | 0,307        | 0,212        | 0,023                 | 0,267        | 0,332        | 0,228        | 0,024                 | 0,227       | 0,281        | 0,199        | 0,023                 |  |
| <i>ADIN</i> | 0,151        | 0,168        | 0,131        | 0,007                 | 0,142        | 0,153        | 0,126        | 0,006                 | 0,143        | 0,154        | 0,13         | 0,005                 | 0,139        | 0,153        | 0,124        | 0,005                 | 0,175       | 0,186        | 0,157        | 0,006                 |  |
| <i>ADIO</i> | 0,265        | 0,29         | 0,226        | 0,011                 | 0,25         | 0,27         | 0,213        | 0,012                 | 0,261        | 0,285        | 0,234        | 0,01                  | 0,235        | 0,261        | 0,197        | 0,011                 | 0,252       | 0,268        | 0,226        | 0,008                 |  |
| <i>ADIP</i> | 0,245        | 0,28         | 0,196        | 0,018                 | 0,231        | 0,26         | 0,188        | 0,014                 | 0,24         | 0,266        | 0,196        | 0,014                 | 0,233        | 0,259        | 0,191        | 0,013                 | 0,226       | 0,25         | 0,183        | 0,016                 |  |
| <i>ADIQ</i> | 0,248        | 0,275        | 0,232        | 0,008                 | 0,245        | 0,276        | 0,225        | 0,008                 | 0,253        | 0,266        | 0,239        | 0,007                 | 0,235        | 0,262        | 0,206        | 0,01                  | 0,228       | 0,237        | 0,205        | 0,006                 |  |
| <i>ADIR</i> | 0,194        | 0,239        | 0,162        | 0,01                  | 0,171        | 0,209        | 0,142        | 0,01                  | 0,184        | 0,228        | 0,158        | 0,009                 | 0,203        | 0,229        | 0,171        | 0,009                 | 0,218       | 0,243        | 0,208        | 0,004                 |  |

|             |              |              |              |              |              |              |              |              |              |              |              |              |              |              |              |              |              |              |              |              |
|-------------|--------------|--------------|--------------|--------------|--------------|--------------|--------------|--------------|--------------|--------------|--------------|--------------|--------------|--------------|--------------|--------------|--------------|--------------|--------------|--------------|
| Cluster     | <i>ADIF</i>  |              |              |              | <i>ADIG</i>  |              |              |              | <i>ADIH</i>  |              |              |              | <i>ADII</i>  |              |              |              | <i>ADIJ</i>  |              |              |              |
| <i>ADIF</i> | <b>0,84</b>  | <b>0,99</b>  | <b>0,726</b> | <b>0,046</b> |              |              |              |              |              |              |              |              |              |              |              |              |              |              |              |              |
| <i>ADIG</i> | 0,309        | 0,347        | 0,277        | 0,016        | <b>0,82</b>  | <b>0,994</b> | <b>0,739</b> | <b>0,049</b> |              |              |              |              |              |              |              |              |              |              |              |              |
| <i>ADIH</i> | 0,323        | 0,355        | 0,281        | 0,01         | 0,528        | 0,597        | 0,483        | 0,035        | <b>0,879</b> | <b>0,993</b> | <b>0,723</b> | <b>0,052</b> |              |              |              |              |              |              |              |              |
| <i>ADII</i> | 0,178        | 0,197        | 0,163        | 0,005        | 0,199        | 0,222        | 0,182        | 0,012        | 0,231        | 0,247        | 0,199        | 0,006        | <b>0,898</b> | <b>0,98</b>  | <b>0,856</b> | <b>0,028</b> |              |              |              |              |
| <i>ADIJ</i> | 0,198        | 0,21         | 0,179        | 0,004        | 0,228        | 0,259        | 0,209        | 0,015        | 0,259        | 0,273        | 0,222        | 0,007        | 0,623        | 0,647        | 0,609        | 0,007        | <b>0,943</b> | <b>0,997</b> | <b>0,917</b> | <b>0,015</b> |
| <i>ADIK</i> | 0,19         | 0,206        | 0,171        | 0,005        | 0,206        | 0,233        | 0,186        | 0,012        | 0,242        | 0,255        | 0,208        | 0,007        | 0,5          | 0,519        | 0,475        | 0,007        | 0,579        | 0,592        | 0,564        | 0,006        |
| <i>ADIL</i> | 0,196        | 0,206        | 0,178        | 0,004        | 0,216        | 0,238        | 0,198        | 0,013        | 0,261        | 0,272        | 0,229        | 0,006        | 0,594        | 0,602        | 0,588        | 0,004        | 0,69         | 0,698        | 0,68         | 0,004        |
| <i>ADIM</i> | 0,202        | 0,249        | 0,176        | 0,017        | 0,242        | 0,294        | 0,206        | 0,016        | 0,25         | 0,311        | 0,216        | 0,024        | 0,183        | 0,221        | 0,16         | 0,018        | 0,202        | 0,253        | 0,175        | 0,021        |
| <i>ADIN</i> | 0,116        | 0,131        | 0,107        | 0,005        | 0,135        | 0,155        | 0,121        | 0,007        | 0,152        | 0,165        | 0,127        | 0,004        | 0,154        | 0,162        | 0,148        | 0,003        | 0,161        | 0,168        | 0,15         | 0,003        |
| <i>ADIO</i> | 0,188        | 0,211        | 0,17         | 0,008        | 0,211        | 0,241        | 0,191        | 0,015        | 0,257        | 0,272        | 0,22         | 0,007        | 0,241        | 0,256        | 0,223        | 0,007        | 0,229        | 0,241        | 0,213        | 0,006        |
| <i>ADIP</i> | 0,174        | 0,202        | 0,139        | 0,01         | 0,221        | 0,249        | 0,18         | 0,013        | 0,243        | 0,274        | 0,193        | 0,015        | 0,195        | 0,22         | 0,163        | 0,013        | 0,191        | 0,212        | 0,158        | 0,013        |
| <i>ADIQ</i> | 0,186        | 0,205        | 0,174        | 0,006        | 0,211        | 0,235        | 0,196        | 0,007        | 0,234        | 0,259        | 0,216        | 0,007        | 0,234        | 0,243        | 0,224        | 0,004        | 0,226        | 0,238        | 0,214        | 0,004        |
| <i>ADIR</i> | 0,151        | 0,171        | 0,13         | 0,004        | 0,164        | 0,198        | 0,142        | 0,01         | 0,178        | 0,211        | 0,151        | 0,008        | 0,195        | 0,23         | 0,18         | 0,006        | 0,224        | 0,242        | 0,204        | 0,004        |
| Cluster     | <i>ADIK</i>  |              |              |              | <i>ADIL</i>  |              |              |              | <i>ADIM</i>  |              |              |              | <i>ADIN</i>  |              |              |              | <i>ADIO</i>  |              |              |              |
| <i>ADIK</i> | <b>0,915</b> | <b>0,998</b> | <b>0,86</b>  | <b>0,025</b> |              |              |              |              |              |              |              |              |              |              |              |              |              |              |              |              |
| <i>ADIL</i> | 0,583        | 0,594        | 0,561        | 0,007        | <b>0,978</b> | -            | -            | -            |              |              |              |              |              |              |              |              |              |              |              |              |
| <i>ADIM</i> | 0,21         | 0,262        | 0,179        | 0,023        | 0,201        | 0,245        | 0,176        | 0,021        | <b>0,761</b> | <b>0,999</b> | <b>0,621</b> | <b>0,093</b> |              |              |              |              |              |              |              |              |
| <i>ADIN</i> | 0,182        | 0,197        | 0,165        | 0,005        | 0,164        | 0,17         | 0,161        | 0,002        | 0,13         | 0,158        | 0,111        | 0,011        | <b>0,908</b> | <b>0,991</b> | <b>0,828</b> | <b>0,027</b> |              |              |              |              |
| <i>ADIO</i> | 0,223        | 0,243        | 0,195        | 0,012        | 0,246        | 0,251        | 0,238        | 0,003        | 0,23         | 0,289        | 0,199        | 0,025        | 0,2          | 0,212        | 0,183        | 0,005        | <b>0,853</b> | <b>0,981</b> | <b>0,797</b> | <b>0,056</b> |
| <i>ADIP</i> | 0,193        | 0,215        | 0,155        | 0,013        | 0,206        | 0,224        | 0,169        | 0,014        | 0,234        | 0,282        | 0,2          | 0,021        | 0,181        | 0,2          | 0,15         | 0,01         | 0,475        | 0,536        | 0,377        | 0,04         |
| <i>ADIQ</i> | 0,217        | 0,225        | 0,203        | 0,004        | 0,239        | 0,244        | 0,234        | 0,002        | 0,244        | 0,296        | 0,215        | 0,018        | 0,184        | 0,194        | 0,177        | 0,003        | 0,537        | 0,559        | 0,517        | 0,009        |
| <i>ADIR</i> | 0,251        | 0,281        | 0,233        | 0,005        | 0,226        | 0,244        | 0,219        | 0,004        | 0,186        | 0,236        | 0,156        | 0,021        | 0,225        | 0,269        | 0,21         | 0,007        | 0,206        | 0,25         | 0,193        | 0,009        |

| Cluster     | <i>ADIP</i>  |              |              |              | <i>ADIQ</i> |             |              |              | <i>ADIR</i>  |          |              |              |
|-------------|--------------|--------------|--------------|--------------|-------------|-------------|--------------|--------------|--------------|----------|--------------|--------------|
| <i>ADIP</i> | <b>0,741</b> | <b>0,865</b> | <b>0,608</b> | <b>0,073</b> |             |             |              |              |              |          |              |              |
| <i>ADIQ</i> | 0,471        | 0,511        | 0,383        | 0,027        | <b>0,84</b> | <b>0,99</b> | <b>0,696</b> | <b>0,131</b> |              |          |              |              |
| <i>ADIR</i> | 0,199        | 0,241        | 0,156        | 0,019        | 0,209       | 0,238       | 0,201        | 0,005        | <b>0,909</b> | <b>1</b> | <b>0,624</b> | <b>0,059</b> |

$\bar{a}$ , average pairwise identity;  $\bar{a}_{ad}$ , average absolute deviation for  $\bar{a}$ ;  $a_{max}$ , largest pairwise identity;  $a_{min}$ , smallest pairwise identity; bold, calculation within major cluster.
