# Supplementary material for: Comparative genomic analysis of eutherian adiponectin genes
Source: PubMed Central journal article supplement (PMC6040601; doi:10.1016/j.heliyon.2018.e00647), 2018-06-06
Supplement: mmc5.pdf [file mmc5.pdf]

| <i>Homo sapiens</i> ADIA           | 10 | 20 | 30 | 40 | 50 | 60   |
|------------------------------------|----|----|----|----|----|------|
| <i>Homo sapiens</i> ADIA           |    |    |    |    |    |      |
| <i>Papio hamadryas</i> ADIA        |    |    |    |    |    |      |
| <i>Mus musculus</i> Adia           |    |    |    |    |    |      |
| <i>Rattus norvegicus</i> Adia      |    |    |    |    |    |      |
| <i>Cavia porcellus</i> ADIA        |    |    |    |    |    |      |
| <i>Ochotona princeps</i> ADIA      |    |    |    |    |    |      |
| <i>Bos taurus</i> ADIA             |    |    |    |    |    |      |
| <i>Equus caballus</i> ADIA         |    |    |    |    |    |      |
| <i>Canis lupus familiaris</i> ADIA |    |    |    |    |    |      |
| <i>Felis catus</i> ADIA            |    |    |    |    |    |      |
| <i>Myotis lucifugus</i> ADIA       |    |    |    |    |    |      |
| <i>Dasyopus novemcinctus</i> ADIA  |    |    |    |    |    |      |
| <i>Loxodonta africana</i> ADIA     |    |    |    |    |    |      |
| <i>Homo sapiens</i> ADIB           |    |    |    |    |    |      |
| <i>Pan troglodytes</i> ADIB        |    |    |    |    |    |      |
| <i>Pongo abelii</i> ADIB           |    |    |    |    |    |      |
| <i>Nomascus leucogenys</i> ADIB    |    |    |    |    |    |      |
| <i>Callithrix jacchus</i> ADIB     |    |    |    |    |    |      |
| <i>Otolemur garnettii</i> ADIB     |    |    |    |    |    |      |
| <i>Mus musculus</i> Adib           |    |    |    |    |    |      |
| <i>Rattus norvegicus</i> Adib      |    |    |    |    |    |      |
| <i>Cavia porcellus</i> ADIB        |    |    |    |    |    |      |
| <i>Oryctolagus cuniculus</i> ADIB  |    |    |    |    |    |      |
| <i>Bos taurus</i> ADIB             |    |    |    |    |    |      |
| <i>Equus caballus</i> ADIB         |    |    |    |    |    |      |
| <i>Canis lupus familiaris</i> ADIB |    |    |    |    |    |      |
| <i>Myotis lucifugus</i> ADIB       |    |    |    |    |    |      |
| <i>Loxodonta africana</i> ADIB     |    |    |    |    |    |      |
| <i>Homo sapiens</i> ADIC           |    |    |    |    |    |      |
| <i>Macaca mulatta</i> ADIC         |    |    |    |    |    |      |
| <i>Papio hamadryas</i> ADIC        |    |    |    |    |    |      |
| <i>Callithrix jacchus</i> ADIC     |    |    |    |    |    |      |
| <i>Mus musculus</i> Adic           |    |    |    |    |    |      |
| <i>Rattus norvegicus</i> Adic      |    |    |    |    |    |      |
| <i>Cavia porcellus</i> ADIC        |    |    |    |    |    |      |
| <i>Oryctolagus cuniculus</i> ADIC  |    |    |    |    |    |      |
| <i>Equus caballus</i> ADIC         |    |    |    |    |    |      |
| <i>Canis lupus familiaris</i> ADIC |    |    |    |    |    |      |
| <i>Myotis lucifugus</i> ADIC       |    |    |    |    |    |      |
| <i>Loxodonta africana</i> ADIC     |    |    |    |    |    |      |
| <i>Homo sapiens</i> ADID           |    |    |    |    |    |      |
| <i>Pan troglodytes</i> ADID        |    |    |    |    |    |      |
| <i>Pongo abelii</i> ADID           |    |    |    |    |    |      |
| <i>Nomascus leucogenys</i> ADID    |    |    |    |    |    |      |
| <i>Macaca mulatta</i> ADID         |    |    |    |    |    |      |
| <i>Otolemur garnettii</i> ADID     |    |    |    |    |    |      |
| <i>Mus musculus</i> Adid           |    |    |    |    |    |      |
| <i>Rattus norvegicus</i> Adid      |    |    |    |    |    |      |
| <i>Cavia porcellus</i> ADID        |    |    |    |    |    |      |
| <i>Oryctolagus cuniculus</i> ADID  |    |    |    |    |    |      |
| <i>Bos taurus</i> ADID             |    |    |    |    |    |      |
| <i>Equus caballus</i> ADID         | 1  |    |    |    |    | MG 2 |
| <i>Canis lupus familiaris</i> ADID |    |    |    |    |    |      |
| <i>Felis catus</i> ADID            |    |    |    |    |    |      |
| <i>Myotis lucifugus</i> ADID       |    |    |    |    |    |      |
| <i>Dasyopus novemcinctus</i> ADID  |    |    |    |    |    |      |
| <i>Loxodonta africana</i> ADID     |    |    |    |    |    |      |
| <i>Homo sapiens</i> ADIE           |    |    |    |    |    |      |
| <i>Pan troglodytes</i> ADIE        |    |    |    |    |    |      |
| <i>Pongo abelii</i> ADIE           |    |    |    |    |    |      |
| <i>Papio hamadryas</i> ADIE        |    |    |    |    |    |      |
| <i>Callithrix jacchus</i> ADIE     |    |    |    |    |    |      |
| <i>Otolemur garnettii</i> ADIE     |    |    |    |    |    |      |
| <i>Mus musculus</i> Adie           |    |    |    |    |    |      |
| <i>Rattus norvegicus</i> Adie      |    |    |    |    |    |      |
| <i>Homo sapiens</i> ADIF1          |    |    |    |    |    |      |
| <i>Homo sapiens</i> ADIF2          |    |    |    |    |    |      |
| <i>Pan troglodytes</i> ADIF1       |    |    |    |    |    |      |
| <i>Pongo abelii</i> ADIF1          |    |    |    |    |    |      |
| <i>Nomascus leucogenys</i> ADIF1   |    |    |    |    |    |      |
| <i>Macaca mulatta</i> ADIF1        |    |    |    |    |    |      |
| <i>Papio hamadryas</i> ADIF1       |    |    |    |    |    |      |

|                                     |   |                                                                                                    |    |
|-------------------------------------|---|----------------------------------------------------------------------------------------------------|----|
| <i>Microcebus murinus</i> ADIF1     | - | -----                                                                                              | -  |
| <i>Otolemur garnettii</i> ADIF1     | - | -----                                                                                              | -  |
| <i>Mus musculus</i> Adif1           | - | -----                                                                                              | -  |
| <i>Rattus norvegicus</i> Adif1      | - | -----                                                                                              | -  |
| <i>Cavia porcellus</i> ADIF1        | - | -----                                                                                              | -  |
| <i>Oryctolagus cuniculus</i> ADIF1  | - | -----                                                                                              | -  |
| <i>Ochotona princeps</i> ADIF1      | - | -----                                                                                              | -  |
| <i>Bos taurus</i> ADIF1             | - | -----                                                                                              | -  |
| <i>Equus caballus</i> ADIF1         | - | -----                                                                                              | -  |
| <i>Canis lupus familiaris</i> ADIF1 | - | -----                                                                                              | -  |
| <i>Felis catus</i> ADIF1            | - | -----                                                                                              | -  |
| <i>Dasyopus novemcinctus</i> ADIF1  | - | -----                                                                                              | -  |
| <i>Loxodonta africana</i> ADIF1     | - | -----                                                                                              | -  |
| <i>Homo sapiens</i> ADIG            | - | -----                                                                                              | -  |
| <i>Pan troglodytes</i> ADIG         | - | -----                                                                                              | -  |
| <i>Pongo abelii</i> ADIG            | - | -----                                                                                              | -  |
| <i>Callithrix jacchus</i> ADIG      | - | -----                                                                                              | -  |
| <i>Otolemur garnettii</i> ADIG      | - | -----                                                                                              | -  |
| <i>Mus musculus</i> Adig            | - | -----                                                                                              | -  |
| <i>Rattus norvegicus</i> Adig       | - | -----                                                                                              | -  |
| <i>Cavia porcellus</i> ADIG         | - | -----                                                                                              | -  |
| <i>Oryctolagus cuniculus</i> ADIG   | - | -----                                                                                              | -  |
| <i>Tursiops truncatus</i> ADIG      | - | -----                                                                                              | -  |
| <i>Bos taurus</i> ADIG              | - | -----                                                                                              | -  |
| <i>Equus caballus</i> ADIG          | - | -----                                                                                              | -  |
| <i>Canis lupus familiaris</i> ADIG  | - | -----                                                                                              | -  |
| <i>Myotis lucifugus</i> ADIG        | - | -----                                                                                              | -  |
| <i>Homo sapiens</i> ADIH            | - | -----                                                                                              | -  |
| <i>Pan troglodytes</i> ADIH         | - | -----                                                                                              | -  |
| <i>Pongo abelii</i> ADIH            | - | -----                                                                                              | -  |
| <i>Nomascus leucogenys</i> ADIH     | - | -----                                                                                              | -  |
| <i>Macaca mulatta</i> ADIH          | - | -----                                                                                              | -  |
| <i>Papio hamadryas</i> ADIH         | - | -----                                                                                              | -  |
| <i>Mus musculus</i> Adih            | - | -----                                                                                              | -  |
| <i>Rattus norvegicus</i> Adih       | - | -----                                                                                              | -  |
| <i>Dipodomys ordii</i> ADIH         | - | -----                                                                                              | -  |
| <i>Cavia porcellus</i> ADIH         | - | -----                                                                                              | -  |
| <i>Bos taurus</i> ADIH              | - | -----                                                                                              | -  |
| <i>Equus caballus</i> ADIH          | - | -----                                                                                              | -  |
| <i>Canis lupus familiaris</i> ADIH  | - | -----                                                                                              | -  |
| <i>Pteropus vampyrus</i> ADIH       | - | -----                                                                                              | -  |
| <i>Loxodonta africana</i> ADIH      | - | -----                                                                                              | -  |
| <i>Homo sapiens</i> ADII            | - | -----                                                                                              | -  |
| <i>Pongo abelii</i> ADII            | - | -----                                                                                              | -  |
| <i>Macaca mulatta</i> ADII          | - | -----                                                                                              | -  |
| <i>Mus musculus</i> Adii            | - | -----                                                                                              | -  |
| <i>Rattus norvegicus</i> Adii       | - | -----                                                                                              | -  |
| <i>Bos taurus</i> ADII              | - | -----                                                                                              | -  |
| <i>Canis lupus familiaris</i> ADII  | - | -----                                                                                              | -  |
| <i>Dasyopus novemcinctus</i> ADII   | - | -----                                                                                              | -  |
| <i>Homo sapiens</i> ADIJ            | - | -----                                                                                              | -  |
| <i>Pan troglodytes</i> ADIJ         | - | -----                                                                                              | -  |
| <i>Papio hamadryas</i> ADIJ         | - | -----                                                                                              | -  |
| <i>Mus musculus</i> Adij            | - | -----                                                                                              | -  |
| <i>Rattus norvegicus</i> Adij       | - | -----                                                                                              | -  |
| <i>Oryctolagus cuniculus</i> ADIJ   | - | -----                                                                                              | -  |
| <i>Bos taurus</i> ADIJ              | - | -----                                                                                              | -  |
| <i>Canis lupus familiaris</i> ADIJ  | - | -----                                                                                              | -  |
| <i>Loxodonta africana</i> ADIJ      | - | -----                                                                                              | -  |
| <i>Homo sapiens</i> ADIK            | - | -----                                                                                              | -  |
| <i>Pan troglodytes</i> ADIK         | - | -----                                                                                              | -  |
| <i>Gorilla gorilla</i> ADIK         | - | -----                                                                                              | -  |
| <i>Papio hamadryas</i> ADIK         | - | -----                                                                                              | -  |
| <i>Callithrix jacchus</i> ADIK      | - | -----                                                                                              | -  |
| <i>Rattus norvegicus</i> Adik       | - | -----                                                                                              | -  |
| <i>Cavia porcellus</i> ADIK         | - | -----                                                                                              | -  |
| <i>Equus caballus</i> ADIK          | - | -----                                                                                              | -  |
| <i>Canis lupus familiaris</i> ADIK  | - | -----                                                                                              | -  |
| <i>Dasyopus novemcinctus</i> ADIK   | - | -----                                                                                              | -  |
| <i>Loxodonta africana</i> ADIK      | - | -----                                                                                              | -  |
| <i>Mus musculus</i> Adil            | - | -----                                                                                              | -  |
| <i>Rattus norvegicus</i> Adil       | - | -----                                                                                              | -  |
| <i>Homo sapiens</i> ADIM            | 1 | MLSVPSWL <del>CMF</del> SSHFNRNVPRCDIYEF <del>RQL</del> GT <del>VHT</del> NRSCLWCGKMMNGGCSAWGGLLSL | 60 |
| <i>Pan troglodytes</i> ADIM         | 1 | MLSVPSWL <del>CMF</del> SSHFNRNVPRCDIYEF <del>RQL</del> GT <del>VHT</del> NRSCLWCGKMMNGGCSAWGGLLSL | 60 |

|                                    |   |                                                             |    |
|------------------------------------|---|-------------------------------------------------------------|----|
| <i>Pongo abelii</i> ADIM           | 1 | -----MMNGGCSAWGGLLSL                                        | 16 |
| <i>Nomascus leucogenys</i> ADIM    | 1 | MLSVPSWLCMFSSHFNRNVPRCDIYEFRQLGTVHTNRSCLWCGKMMNGGCSAWGGLLSL | 60 |
| <i>Papio hamadryas</i> ADIM        | 1 | MLSVPSWLCMFSSHFNRNVPRCDIYEFRQLGTVHTNRSCLWCGKMMNGGCSAWGGLLSL | 60 |
| <i>Callithrix jacchus</i> ADIM     | 1 | -----MFSSHFNRNVPRCDIYESRQLESVHTDRSCLWCGKVMNGGCSARGGLLSL     | 51 |
| <i>Mus musculus</i> Adim           | - | -----                                                       | -  |
| <i>Rattus norvegicus</i> Adim      | 1 | -----MGAGLSGVGGSCCHS                                        | 15 |
| <i>Cavia porcellus</i> ADIM        | 1 | -----MGAVLPG-EEGCCHS                                        | 14 |
| <i>Bos taurus</i> ADIM             | - | -----                                                       | -  |
| <i>Equus caballus</i> ADIM         | - | -----                                                       | -  |
| <i>Canis lupus familiaris</i> ADIM | 1 | -----MNGGRPWWGGLLPS                                         | 15 |
| <i>Homo sapiens</i> ADIN           | - | -----                                                       | -  |
| <i>Pan troglodytes</i> ADIN        | - | -----                                                       | -  |
| <i>Pongo abelii</i> ADIN           | - | -----                                                       | -  |
| <i>Nomascus leucogenys</i> ADIN    | - | -----                                                       | -  |
| <i>Macaca mulatta</i> ADIN         | - | -----                                                       | -  |
| <i>Callithrix jacchus</i> ADIN     | - | -----                                                       | -  |
| <i>Mus musculus</i> Adin           | - | -----                                                       | -  |
| <i>Cavia porcellus</i> ADIN        | - | -----                                                       | -  |
| <i>Tursiops truncatus</i> ADIN     | - | -----                                                       | -  |
| <i>Canis lupus familiaris</i> ADIN | - | -----                                                       | -  |
| <i>Dasyurus novemcinctus</i> ADIN  | - | -----                                                       | -  |
| <i>Loxodonta africana</i> ADIN     | - | -----                                                       | -  |
| <i>Homo sapiens</i> ADIO           | - | -----                                                       | -  |
| <i>Pan troglodytes</i> ADIO        | - | -----                                                       | -  |
| <i>Macaca mulatta</i> ADIO         | - | -----                                                       | -  |
| <i>Bos taurus</i> ADIO             | - | -----                                                       | -  |
| <i>Myotis lucifugus</i> ADIO       | - | -----                                                       | -  |
| <i>Homo sapiens</i> ADIP           | 1 | -----MCVECVHVWGLHVCECVMCVCARECVVSACMHAWVCE                  | 38 |
| <i>Otolemur garnettii</i> ADIP     | - | -----                                                       | -  |
| <i>Mus musculus</i> Adip           | - | -----                                                       | -  |
| <i>Cavia porcellus</i> ADIP        | - | -----                                                       | -  |
| <i>Bos taurus</i> ADIP             | - | -----                                                       | -  |
| <i>Equus caballus</i> ADIP         | - | -----                                                       | -  |
| <i>Loxodonta africana</i> ADIP     | - | -----                                                       | -  |
| <i>Homo sapiens</i> ADIQ           | - | -----                                                       | -  |
| <i>Pan troglodytes</i> ADIQ        | - | -----                                                       | -  |
| <i>Pongo abelii</i> ADIQ           | - | -----                                                       | -  |
| <i>Nomascus leucogenys</i> ADIQ    | - | -----                                                       | -  |
| <i>Macaca mulatta</i> ADIQ         | - | -----                                                       | -  |
| <i>Mus musculus</i> Adiq           | - | -----                                                       | -  |
| <i>Rattus norvegicus</i> Adiq      | - | -----                                                       | -  |
| <i>Homo sapiens</i> ADIR           | - | -----                                                       | -  |
| <i>Pan troglodytes</i> ADIR        | - | -----                                                       | -  |
| <i>Pongo abelii</i> ADIR           | - | -----                                                       | -  |
| <i>Nomascus leucogenys</i> ADIR    | - | -----                                                       | -  |
| <i>Macaca mulatta</i> ADIR         | - | -----                                                       | -  |
| <i>Papio hamadryas</i> ADIR        | - | -----                                                       | -  |
| <i>Callithrix jacchus</i> ADIR     | - | -----                                                       | -  |
| <i>Tarsius syrichta</i> ADIR       | - | -----                                                       | -  |
| <i>Otolemur garnettii</i> ADIR     | - | -----                                                       | -  |
| <i>Tupaia belangeri</i> ADIR       | - | -----                                                       | -  |
| <i>Mus musculus</i> Adir           | - | -----                                                       | -  |
| <i>Rattus norvegicus</i> Adir      | - | -----                                                       | -  |
| <i>Cavia porcellus</i> ADIR        | - | -----                                                       | -  |
| <i>Oryctolagus cuniculus</i> ADIR  | - | -----                                                       | -  |
| <i>Tursiops truncatus</i> ADIR     | - | -----                                                       | -  |
| <i>Bos taurus</i> ADIR             | - | -----                                                       | -  |
| <i>Equus caballus</i> ADIR         | - | -----                                                       | -  |
| <i>Canis lupus familiaris</i> ADIR | - | -----                                                       | -  |
| <i>Myotis lucifugus</i> ADIR       | - | -----                                                       | -  |
| <i>Pteropus vampyrus</i> ADIR      | - | -----                                                       | -  |
| <i>Erinaceus europaeus</i> ADIR    | - | -----                                                       | -  |
| <i>Dasyurus novemcinctus</i> ADIR  | - | -----                                                       | -  |
| <i>Choloepus hoffmanni</i> ADIR    | - | -----                                                       | -  |
| <i>Loxodonta africana</i> ADIR     | - | -----                                                       | -  |

|                                    |   |                                                            |    |
|------------------------------------|---|------------------------------------------------------------|----|
| <i>Homo sapiens</i> ADIA           | 1 | -----M                                                     | 2  |
|                                    |   | 70 80 90 100 110 120                                       |    |
| <i>Homo sapiens</i> ADIA           | 1 | -----MM                                                    | 2  |
| <i>Papio hamadryas</i> ADIA        | 1 | -----MM                                                    | 2  |
| <i>Mus musculus</i> Adia           | 1 | -----MDGLMTDGSYHGSNPPCVLTPQEAPEAEL                         | 29 |
| <i>Rattus norvegicus</i> Adia      | - | -----                                                      | -  |
| <i>Cavia porcellus</i> ADIA        | - | -----                                                      | -  |
| <i>Ochotona princeps</i> ADIA      | 1 | -----MA                                                    | 2  |
| <i>Bos taurus</i> ADIA             | - | -----                                                      | -  |
| <i>Equus caballus</i> ADIA         | - | -----                                                      | -  |
| <i>Canis lupus familiaris</i> ADIA | - | -----                                                      | -  |
| <i>Felis catus</i> ADIA            | - | -----                                                      | -  |
| <i>Myotis lucifugus</i> ADIA       | - | -----                                                      | -  |
| <i>Dasyopus novemcinctus</i> ADIA  | - | -----                                                      | -  |
| <i>Loxodonta africana</i> ADIA     | - | -----                                                      | -  |
| <i>Homo sapiens</i> ADIB           | - | -----                                                      | -  |
| <i>Pan troglodytes</i> ADIB        | - | -----                                                      | -  |
| <i>Pongo abelii</i> ADIB           | - | -----                                                      | -  |
| <i>Nomascus leucogenys</i> ADIB    | - | -----                                                      | -  |
| <i>Callithrix jacchus</i> ADIB     | - | -----                                                      | -  |
| <i>Otolemur garnettii</i> ADIB     | - | -----                                                      | -  |
| <i>Mus musculus</i> Adib           | 1 | -----MKGYGRGRGNEEREGEREFSTSSSISPPPLLR                      | 30 |
| <i>Rattus norvegicus</i> Adib      | 1 | -----MGNEEREGERELSTSSSISPPFLLR                             | 23 |
| <i>Cavia porcellus</i> ADIB        | 1 | -----MWQGPPIITLVGAQAAGGGVQGLCGARPGAVGRKEGRDWRLLTPHSASSFLPK | 51 |
| <i>Oryctolagus cuniculus</i> ADIB  | 1 | -----MPASEAWHQGRLGWRVPRGLGWGPWGGSEDEQGTGRARPGGLSPLPYHSLPS  | 53 |
| <i>Bos taurus</i> ADIB             | - | -----                                                      | -  |
| <i>Equus caballus</i> ADIB         | 1 | -----MRGWVVSPALSSSTSFPR                                    | 18 |
| <i>Canis lupus familiaris</i> ADIB | - | -----                                                      | -  |
| <i>Myotis lucifugus</i> ADIB       | - | -----                                                      | -  |
| <i>Loxodonta africana</i> ADIB     | - | -----                                                      | -  |
| <i>Homo sapiens</i> ADIC           | - | -----                                                      | -  |
| <i>Macaca mulatta</i> ADIC         | - | -----                                                      | -  |
| <i>Papio hamadryas</i> ADIC        | - | -----                                                      | -  |
| <i>Callithrix jacchus</i> ADIC     | - | -----                                                      | -  |
| <i>Mus musculus</i> Adic           | - | -----                                                      | -  |
| <i>Rattus norvegicus</i> Adic      | 1 | -----MPGVFVCLCRNI                                          | 12 |
| <i>Cavia porcellus</i> ADIC        | - | -----                                                      | -  |
| <i>Oryctolagus cuniculus</i> ADIC  | 1 | -----MRLCPVHACLVRVLRFRWACVVRGGGEPERRPSSHLCLEHRRHH          | 42 |
| <i>Equus caballus</i> ADIC         | 1 | -----MSSSGGIQVRKLGVHERVMSACRGPAPCLHSGI                     | 33 |
| <i>Canis lupus familiaris</i> ADIC | 1 | -----MGVCACVRSGPDPCLRSGI                                   | 19 |
| <i>Myotis lucifugus</i> ADIC       | - | -----                                                      | -  |
| <i>Loxodonta africana</i> ADIC     | 1 | -----MSSLPSPTLCLHSAI                                       | 15 |
| <i>Homo sapiens</i> ADID           | 1 | -----MDGVLCRSRLGVCVGSVSPWLTVMWIPGLR                        | 31 |
| <i>Pan troglodytes</i> ADID        | 1 | -----MDGVLCRSRLGVCVGSVSPWLTVMWIPGLR                        | 31 |
| <i>Pongo abelii</i> ADID           | - | -----                                                      | -  |
| <i>Nomascus leucogenys</i> ADID    | 1 | -----MESCVGNWV-CCVGSVSPWLTVMWIPGLR                         | 30 |
| <i>Macaca mulatta</i> ADID         | 1 | -----MESCVGISWV-CCVGSVSPWLTVMWIPGLR                        | 30 |
| <i>Otolemur garnettii</i> ADID     | - | -----                                                      | -  |
| <i>Mus musculus</i> Adid           | 1 | -----MTIHLSISGLR                                           | 11 |
| <i>Rattus norvegicus</i> Adid      | - | -----                                                      | -  |
| <i>Cavia porcellus</i> ADID        | 1 | -----MESSFMSVPCTAGLSLGGSLGCSERSASPWLTAHSHIPGLR             | 42 |
| <i>Oryctolagus cuniculus</i> ADID  | 1 | -----MGHVCIPGLR                                            | 10 |
| <i>Bos taurus</i> ADID             | - | -----                                                      | -  |
| <i>Equus caballus</i> ADID         | 3 | QCVSGCLTRSRLKDYVCVACAYMCVQVCVCMYVVCVWVGCVAWGLLSWLTVMWIPGLR | 62 |
| <i>Canis lupus familiaris</i> ADID | 1 | -----MQIWPGLR                                              | 9  |
| <i>Felis catus</i> ADID            | - | -----                                                      | -  |
| <i>Myotis lucifugus</i> ADID       | 1 | -----MAGLISGLR                                             | 9  |
| <i>Dasyopus novemcinctus</i> ADID  | - | -----                                                      | -  |
| <i>Loxodonta africana</i> ADID     | - | -----                                                      | -  |
| <i>Homo sapiens</i> ADIE           | - | -----                                                      | -  |
| <i>Pan troglodytes</i> ADIE        | - | -----                                                      | -  |
| <i>Pongo abelii</i> ADIE           | - | -----                                                      | -  |
| <i>Papio hamadryas</i> ADIE        | - | -----                                                      | -  |
| <i>Callithrix jacchus</i> ADIE     | - | -----                                                      | -  |
| <i>Otolemur garnettii</i> ADIE     | - | -----                                                      | -  |
| <i>Mus musculus</i> Adie           | - | -----                                                      | -  |
| <i>Rattus norvegicus</i> Adie      | - | -----                                                      | -  |
| <i>Homo sapiens</i> ADIF1          | - | -----                                                      | -  |
| <i>Homo sapiens</i> ADIF2          | - | -----                                                      | -  |
| <i>Pan troglodytes</i> ADIF1       | - | -----                                                      | -  |
| <i>Pongo abelii</i> ADIF1          | - | -----                                                      | -  |
| <i>Nomascus leucogenys</i> ADIF1   | - | -----                                                      | -  |
| <i>Macaca mulatta</i> ADIF1        | - | -----                                                      | -  |
| <i>Papio hamadryas</i> ADIF1       | - | -----                                                      | -  |

|                                     |    |                                                               |     |
|-------------------------------------|----|---------------------------------------------------------------|-----|
| <i>Microcebus murinus</i> ADIF1     | -  | -----                                                         | -   |
| <i>Otolemur garnettii</i> ADIF1     | -  | -----                                                         | -   |
| <i>Mus musculus</i> Adif1           | 1  | -----MPSNCTCTQGLYILQFLFSLFQLRPCGLT                            | 29  |
| <i>Rattus norvegicus</i> Adif1      | 1  | -----MPLPVSVSLSFQSRPCRLT                                      | 18  |
| <i>Cavia porcellus</i> ADIF1        | -  | -----                                                         | -   |
| <i>Oryctolagus cuniculus</i> ADIF1  | -  | -----                                                         | -   |
| <i>Ochotona princeps</i> ADIF1      | -  | -----                                                         | -   |
| <i>Bos taurus</i> ADIF1             | -  | -----                                                         | -   |
| <i>Equus caballus</i> ADIF1         | -  | -----                                                         | -   |
| <i>Canis lupus familiaris</i> ADIF1 | -  | -----                                                         | -   |
| <i>Felis catus</i> ADIF1            | -  | -----                                                         | -   |
| <i>Dasyopus novemcinctus</i> ADIF1  | -  | -----                                                         | -   |
| <i>Loxodonta africana</i> ADIF1     | -  | -----                                                         | -   |
| <i>Homo sapiens</i> ADIG            | 1  | ----MKVNSVLHVWVWDEHWSDDLQMHILLFKLIQSCQTTPLP-TQKVHLRLCVSLPEPK  | 54  |
| <i>Pan troglodytes</i> ADIG         | 1  | ----MKVNRVLHVWVWDEHWSDDLQMHILMFKLIQSCQTTPLP-TQKVHLRLCVSLPEPK  | 54  |
| <i>Pongo abelii</i> ADIG            | 1  | ----MKVNRVLHVWVWDEHWSDDLQMHILMFKLIQSCQTTPLP-TQKAHLRPCVSLPEPK  | 54  |
| <i>Callithrix jacchus</i> ADIG      | 1  | -----MCGKINTELLVFRLIQSCQTTPLL-TQKVHLPCVSLPEPK                 | 40  |
| <i>Otolemur garnettii</i> ADIG      | -  | -----                                                         | -   |
| <i>Mus musculus</i> Adig            | 1  | -----MK-KANARGDCTHAHSSAHPNSIMPKPPFGE-STDVFTSLLEPK             | 42  |
| <i>Rattus norvegicus</i> Adig       | 1  | -----MGGKANAGGQLSTAHS AHPNSIAPKPPFGE-YTDVCTSLLEPK             | 43  |
| <i>Cavia porcellus</i> ADIG         | -  | -----                                                         | -   |
| <i>Oryctolagus cuniculus</i> ADIG   | -  | -----                                                         | -   |
| <i>Tursiops truncatus</i> ADIG      | 1  | -----MELLGQTGYLDTHGEVSPGVNFCPCPFSCVMPKTPPKRVHLPCVSLPEPK       | 52  |
| <i>Bos taurus</i> ADIG              | -  | -----                                                         | -   |
| <i>Equus caballus</i> ADIG          | 1  | -----MHGKVSTGVNYCKCPFLCSIMPKPPPVRVHLPCVSLPEPK                 | 41  |
| <i>Canis lupus familiaris</i> ADIG  | 1  | -----MHGEVSTGVSGCKRLFSCSFMPKLSPERVHLPCVSLPEPK                 | 41  |
| <i>Myotis lucifugus</i> ADIG        | -  | -----                                                         | -   |
| <i>Homo sapiens</i> ADIH            | -  | -----                                                         | -   |
| <i>Pan troglodytes</i> ADIH         | -  | -----                                                         | -   |
| <i>Pongo abelii</i> ADIH            | -  | -----                                                         | -   |
| <i>Nomascus leucogenys</i> ADIH     | -  | -----                                                         | -   |
| <i>Macaca mulatta</i> ADIH          | -  | -----                                                         | -   |
| <i>Papio hamadryas</i> ADIH         | -  | -----                                                         | -   |
| <i>Mus musculus</i> Adih            | 1  | -----MLLQVTT                                                  | 7   |
| <i>Rattus norvegicus</i> Adih       | 1  | -----MQLHPCLLLLLLIPLIFPPMPYWSVVCQHHVHSYLLFCHPQVTT             | 44  |
| <i>Dipodomys ordii</i> ADIH         | -  | -----                                                         | -   |
| <i>Cavia porcellus</i> ADIH         | -  | -----                                                         | -   |
| <i>Bos taurus</i> ADIH              | 1  | -----MARLTYSQLSCLPQVAT                                        | 17  |
| <i>Equus caballus</i> ADIH          | -  | -----                                                         | -   |
| <i>Canis lupus familiaris</i> ADIH  | -  | -----                                                         | -   |
| <i>Pteropus vampyrus</i> ADIH       | -  | -----                                                         | -   |
| <i>Loxodonta africana</i> ADIH      | -  | -----                                                         | -   |
| <i>Homo sapiens</i> ADII            | -  | -----                                                         | -   |
| <i>Pongo abelii</i> ADII            | -  | -----                                                         | -   |
| <i>Macaca mulatta</i> ADII          | -  | -----                                                         | -   |
| <i>Mus musculus</i> Adii            | -  | -----                                                         | -   |
| <i>Rattus norvegicus</i> Adii       | -  | -----                                                         | -   |
| <i>Bos taurus</i> ADII              | -  | -----                                                         | -   |
| <i>Canis lupus familiaris</i> ADII  | -  | -----                                                         | -   |
| <i>Dasyopus novemcinctus</i> ADII   | -  | -----                                                         | -   |
| <i>Homo sapiens</i> ADIJ            | -  | -----                                                         | -   |
| <i>Pan troglodytes</i> ADIJ         | -  | -----                                                         | -   |
| <i>Papio hamadryas</i> ADIJ         | -  | -----                                                         | -   |
| <i>Mus musculus</i> Adij            | -  | -----                                                         | -   |
| <i>Rattus norvegicus</i> Adij       | -  | -----                                                         | -   |
| <i>Oryctolagus cuniculus</i> ADIJ   | -  | -----                                                         | -   |
| <i>Bos taurus</i> ADIJ              | -  | -----                                                         | -   |
| <i>Canis lupus familiaris</i> ADIJ  | -  | -----                                                         | -   |
| <i>Loxodonta africana</i> ADIJ      | -  | -----                                                         | -   |
| <i>Homo sapiens</i> ADIK            | -  | -----                                                         | -   |
| <i>Pan troglodytes</i> ADIK         | -  | -----                                                         | -   |
| <i>Gorilla gorilla</i> ADIK         | -  | -----                                                         | -   |
| <i>Papio hamadryas</i> ADIK         | -  | -----                                                         | -   |
| <i>Callithrix jacchus</i> ADIK      | -  | -----                                                         | -   |
| <i>Rattus norvegicus</i> Adik       | -  | -----                                                         | -   |
| <i>Cavia porcellus</i> ADIK         | -  | -----                                                         | -   |
| <i>Equus caballus</i> ADIK          | -  | -----                                                         | -   |
| <i>Canis lupus familiaris</i> ADIK  | -  | -----                                                         | -   |
| <i>Dasyopus novemcinctus</i> ADIK   | -  | -----                                                         | -   |
| <i>Loxodonta africana</i> ADIK      | -  | -----                                                         | -   |
| <i>Mus musculus</i> Adil            | -  | -----                                                         | -   |
| <i>Rattus norvegicus</i> Adil       | -  | -----                                                         | -   |
| <i>Homo sapiens</i> ADIM            | 61 | WHAYSLIYYTPKYKTTTPP---LQLSAPVLASAR---GDHAPGAL---LSSQGDSEALLRI | 111 |
| <i>Pan troglodytes</i> ADIM         | 61 | WHAYSLIYYTPKYKTTTPP---LQLSAPVLASAR---GDHAPGAL---LSSQGDSEALLRI | 111 |

|                                    |    |                                                                |     |
|------------------------------------|----|----------------------------------------------------------------|-----|
| <i>Pongo abelii</i> ADIM           | 17 | WHSYSLIYYTPKYKTTTPP---LQLSAPVLASAR---GDHAPGAL---LSSQGDSEALLRI  | 67  |
| <i>Nomascus leucogenys</i> ADIM    | 61 | WHAYSLLIYYTPKYKTTTPP---LQLSAPVLASAR---GDHAPGAL---LSSQGDSEALLRI | 111 |
| <i>Papio hamadryas</i> ADIM        | 61 | WHAYSLLIYYTPKYKTTTPP---LQLSAPVLASAR---GDHAPGAL---LSSQGSSEALLRI | 111 |
| <i>Callithrix jacchus</i> ADIM     | 52 | WHAYSLLIYYTPNYKTKLRAASALSSSPGIHPRRPR-SWKEP-----QGGSEALLRI      | 101 |
| <i>Mus musculus</i> Adim           | -  | -----                                                          | -   |
| <i>Rattus norvegicus</i> Adim      | 16 | GMTAALFITHQKYKTTQPAA-ALISKPGICLRRLRCGCRVPGAYSPhQLPRGDSADLSRA   | 74  |
| <i>Cavia porcellus</i> ADIM        | 15 | GVSAALFITHQSIKPPSPAA-VLIFSPGICLRRSR-FLKPP-----LSSQGGSVALLKI    | 66  |
| <i>Bos taurus</i> ADIM             | -  | -----                                                          | -   |
| <i>Equus caballus</i> ADIM         | -  | -----                                                          | -   |
| <i>Canis lupus familiaris</i> ADIM | 16 | GMPAALFITHQSIKPPSR---LQLASPALAFAREA-PPSSP-----GGSGALLRN        | 61  |
| <i>Homo sapiens</i> ADIN           | -  | -----                                                          | -   |
| <i>Pan troglodytes</i> ADIN        | -  | -----                                                          | -   |
| <i>Pongo abelii</i> ADIN           | -  | -----                                                          | -   |
| <i>Nomascus leucogenys</i> ADIN    | -  | -----                                                          | -   |
| <i>Macaca mulatta</i> ADIN         | -  | -----                                                          | -   |
| <i>Callithrix jacchus</i> ADIN     | -  | -----                                                          | -   |
| <i>Mus musculus</i> Adin           | -  | -----                                                          | -   |
| <i>Cavia porcellus</i> ADIN        | 1  | -----MSPVLPVSTGA                                               | 11  |
| <i>Tursiops truncatus</i> ADIN     | -  | -----                                                          | -   |
| <i>Canis lupus familiaris</i> ADIN | -  | -----                                                          | -   |
| <i>Dasyopus novemcinctus</i> ADIN  | -  | -----                                                          | -   |
| <i>Loxodonta africana</i> ADIN     | -  | -----                                                          | -   |
| <i>Homo sapiens</i> ADIO           | -  | -----                                                          | -   |
| <i>Pan troglodytes</i> ADIO        | -  | -----                                                          | -   |
| <i>Macaca mulatta</i> ADIO         | -  | -----                                                          | -   |
| <i>Bos taurus</i> ADIO             | -  | -----                                                          | -   |
| <i>Myotis lucifugus</i> ADIO       | -  | -----                                                          | -   |
| <i>Homo sapiens</i> ADIP           | 39 | SDCPPRSCVTAAFPSPGVRLGKHLRFPGCFSPQFSGCFVQLLPNSVPSLCVSPFPPGPRK   | 98  |
| <i>Otolemur garnettii</i> ADIP     | -  | -----                                                          | -   |
| <i>Mus musculus</i> Adip           | -  | -----                                                          | -   |
| <i>Cavia porcellus</i> ADIP        | -  | -----                                                          | -   |
| <i>Bos taurus</i> ADIP             | 1  | -----MGLFSPWGSSSPHPPCVS-PAGLGGK                                | 25  |
| <i>Equus caballus</i> ADIP         | -  | -----                                                          | -   |
| <i>Loxodonta africana</i> ADIP     | 1  | -----MVIAGLGKRPSFLAASPRSPIPTRPLPHLSPCGVSFPFGHGRK               | 43  |
| <i>Homo sapiens</i> ADIQ           | 1  | -----MQWLRVRESPGEATGHRVT                                       | 19  |
| <i>Pan troglodytes</i> ADIQ        | 1  | -----MQWLRVRESPGEATGHRVT                                       | 19  |
| <i>Pongo abelii</i> ADIQ           | 1  | -----MQWLRVRESPGEATGHRVT                                       | 19  |
| <i>Nomascus leucogenys</i> ADIQ    | 1  | -----MQWLRVRESPGEATGHRVT                                       | 19  |
| <i>Macaca mulatta</i> ADIQ         | 1  | -----MQWLRVRDSPGEATGHRVT                                       | 19  |
| <i>Mus musculus</i> Adiq           | 1  | -----MRVI                                                      | 4   |
| <i>Rattus norvegicus</i> Adiq      | 1  | -----MRVI                                                      | 4   |
| <i>Homo sapiens</i> ADIR           | -  | -----                                                          | -   |
| <i>Pan troglodytes</i> ADIR        | -  | -----                                                          | -   |
| <i>Pongo abelii</i> ADIR           | -  | -----                                                          | -   |
| <i>Nomascus leucogenys</i> ADIR    | -  | -----                                                          | -   |
| <i>Macaca mulatta</i> ADIR         | -  | -----                                                          | -   |
| <i>Papio hamadryas</i> ADIR        | -  | -----                                                          | -   |
| <i>Callithrix jacchus</i> ADIR     | -  | -----                                                          | -   |
| <i>Tarsius syrichta</i> ADIR       | -  | -----                                                          | -   |
| <i>Otolemur garnettii</i> ADIR     | -  | -----                                                          | -   |
| <i>Tupaia belangeri</i> ADIR       | -  | -----                                                          | -   |
| <i>Mus musculus</i> Adir           | -  | -----                                                          | -   |
| <i>Rattus norvegicus</i> Adir      | -  | -----                                                          | -   |
| <i>Cavia porcellus</i> ADIR        | -  | -----                                                          | -   |
| <i>Oryctolagus cuniculus</i> ADIR  | -  | -----                                                          | -   |
| <i>Tursiops truncatus</i> ADIR     | -  | -----                                                          | -   |
| <i>Bos taurus</i> ADIR             | -  | -----                                                          | -   |
| <i>Equus caballus</i> ADIR         | -  | -----                                                          | -   |
| <i>Canis lupus familiaris</i> ADIR | -  | -----                                                          | -   |
| <i>Myotis lucifugus</i> ADIR       | -  | -----                                                          | -   |
| <i>Pteropus vampyrus</i> ADIR      | -  | -----                                                          | -   |
| <i>Erinaceus europaeus</i> ADIR    | -  | -----                                                          | -   |
| <i>Dasyopus novemcinctus</i> ADIR  | -  | -----                                                          | -   |
| <i>Choloepus hoffmanni</i> ADIR    | -  | -----                                                          | -   |
| <i>Loxodonta africana</i> ADIR     | -  | -----                                                          | -   |

|                                    |    |                                                      |    |
|------------------------------------|----|------------------------------------------------------|----|
| <i>Homo sapiens</i> ADIA           | 3  | MKIP-WGSIPV-LMLL-----LLL---GLIDISQAQ-L-----          | 29 |
|                                    |    | 130 140 150 160 170 180                              |    |
| <i>Homo sapiens</i> ADIA           | 3  | MKIP-WGSIPV-LMLL-----LLL---GLIDISQAQ-L-----          | 29 |
| <i>Papio hamadryas</i> ADIA        | 3  | MKIL-WGSIPV-LMLL-----LLL---GLLDVSWAQ-G-----          | 29 |
| <i>Mus musculus</i> Adia           | 30 | MKTQ-WGEVWT-HLLL-----LLL---GFLHVSWAQ-S-----          | 56 |
| <i>Rattus norvegicus</i> Adia      | 1  | MKTQ-WSEIIT-PLLL-----LLL---GLLHVSWAQ-S-----          | 27 |
| <i>Cavia porcellus</i> ADIA        | 1  | MKIP-WGDVSV-LLLL-----LLL---PLLRVSRVQ-S-----          | 27 |
| <i>Ochotona princeps</i> ADIA      | 3  | MKSP-RGSIPA---LL-----LLL---SLLDASQAQ-S-----          | 27 |
| <i>Bos taurus</i> ADIA             | 1  | MKTP-RGSIVL---L-----LLL---NLLRVSWAQ-S-----           | 24 |
| <i>Equus caballus</i> ADIA         | 1  | MKTLTMGGILA-LLPL-----LLL---GPLDVSRQA-S-----          | 28 |
| <i>Canis lupus familiaris</i> ADIA | 1  | MKTP-RGGILA-LLLP-----LLL---GLLEVSWAQ-----            | 26 |
| <i>Felis catus</i> ADIA            | 1  | MKTV-RDGVLASLLLL-----LLLF--LFLLEVSWAQ-S-----         | 30 |
| <i>Myotis lucifugus</i> ADIA       | 1  | MKTP-RGGILA-LLLP-----LLL---GPLDVSRQA-R-----          | 27 |
| <i>Dasyopus novemcinctus</i> ADIA  | 1  | MKTL-WGGVLP---L-----LLL---SLPDASCAQ-S-----           | 24 |
| <i>Loxodonta africana</i> ADIA     | 1  | MKTL-WAGIPV-LLPL-----LLL---SLLGVSWAQ-I-----          | 27 |
| <i>Homo sapiens</i> ADIB           | 1  | MDVG-PSSPLHLGKL-----LLL---LLLPLRGQAN-T-----          | 30 |
| <i>Pan troglodytes</i> ADIB        | 1  | MDMG-PSSPLHLGKL-----LLL---LLLPLRGQAN-T-----          | 30 |
| <i>Pongo abelii</i> ADIB           | 1  | MDMG-PSSPLHLGKL-----LLP---LLLPLRGQAN-T-----          | 30 |
| <i>Nomascus leucogenys</i> ADIB    | 1  | MDVG-PSSPLHLGKL-----LLL---LLLPLRGQAN-T-----          | 31 |
| <i>Callithrix jacchus</i> ADIB     | 1  | MDVG-HGS--HFGLNL-----LLL---LLLPLRSQAN-T-----         | 29 |
| <i>Otolemur garnettii</i> ADIB     | 1  | M-V--PNCRPHLQNL-----LLL---LLVPLGGQAS-T-----          | 28 |
| <i>Mus musculus</i> Adib           | 31 | MVVG-PSCQPPCGLCL-----LLLF--LLALPLRSQAS-A-----        | 61 |
| <i>Rattus norvegicus</i> Adib      | 24 | MVVG-TSCQPQHGLYL-----LLL---LLALPLRSQAN-A-----        | 53 |
| <i>Cavia porcellus</i> ADIB        | 52 | MDVG-L---PLGLHL-----LLL---LLAVPLRGQTR-P-----         | 77 |
| <i>Oryctolagus cuniculus</i> ADIB  | 54 | MDVG-LGSQSPGLHL-----LLL---LLALPLGSQAS-A-----         | 83 |
| <i>Bos taurus</i> ADIB             | 1  | MGGG-A--WPLLVLNL-----LLL---LLARPLRGQTE-T-----        | 28 |
| <i>Equus caballus</i> ADIB         | 19 | MDVG-SSSRPLGLHL-----LLL---LLALPLGGQAS-T-----         | 48 |
| <i>Canis lupus familiaris</i> ADIB | 1  | MDTG-PSSWPHLGLNL-----LLL---LLALPLGGQAS-T-----        | 30 |
| <i>Myotis lucifugus</i> ADIB       | 1  | MDRG-SSIWPLGLNL-----LLL---LLALPLGGLAA-T-----         | 30 |
| <i>Loxodonta africana</i> ADIB     | 1  | M--G-PGSQPPLSLNL-----LLL---LLTLPLRGQAS-T-----        | 28 |
| <i>Homo sapiens</i> ADIC           | 1  | MEGP-RG-WLVLCVLA-----ISL---AS-MV--TE-D-----          | 24 |
| <i>Macaca mulatta</i> ADIC         | 1  | MEGP-QG-WLVVCVLA-----ISL---AS-IV--TQ-N-----          | 24 |
| <i>Papio hamadryas</i> ADIC        | 1  | MEGP-QG-WLVVCVLA-----ISL---AS-IV--TQ-N-----          | 24 |
| <i>Callithrix jacchus</i> ADIC     | 1  | MEGS-QG-WLVVCVLA-----ISL---AS-TV--TQ-D-----          | 24 |
| <i>Mus musculus</i> Adic           | 1  | METS-QG-WLVACVLT-----MTL---VW-TV--AE-D-----          | 24 |
| <i>Rattus norvegicus</i> Adic      | 13 | METS-QG-WLVACVLA-----VTL---VW-TV--AE-D-----          | 36 |
| <i>Cavia porcellus</i> ADIC        | 1  | M--TP-RL-WLLVCVLA-----VSL---SS-GV--AE-D-----         | 23 |
| <i>Oryctolagus cuniculus</i> ADIC  | 43 | METS-T--WLLLCVLA-----TSL---SS-GV--TQ-G-----          | 65 |
| <i>Equus caballus</i> ADIC         | 34 | MEAP-WG-WLMVGVLA-----VSL---AS-TG--TQ-D-----          | 57 |
| <i>Canis lupus familiaris</i> ADIC | 20 | MEAP-WG-WLALCVLA-----TSL---AS-AV--TQ-D-----          | 43 |
| <i>Myotis lucifugus</i> ADIC       | 1  | MEAP-WG-WLVVGVLA-----MSL---AS-TV--TQ-N-----          | 24 |
| <i>Loxodonta africana</i> ADIC     | 16 | MEAP-KG-WLVVCVLA-----VSL---AS-TV--TQ-D-----          | 39 |
| <i>Homo sapiens</i> ADID           | 32 | M--L---LLG--AVL-----LLL---ALP--GHDQ-E--TTTQGP-G----- | 57 |
| <i>Pan troglodytes</i> ADID        | 32 | M--L---LLG--AVL-----LLL---ALP--GHDQ-E--TTTQGP-G----- | 57 |
| <i>Pongo abelii</i> ADID           | 1  | M--L---LLG--AIL-----LLL---ALP--SHGQ-E--TTTQGP-R----- | 26 |
| <i>Nomascus leucogenys</i> ADID    | 31 | M--L---LLG--AVL-----LLL---ALP--SHGQ-D--TTTQGP-G----- | 56 |
| <i>Macaca mulatta</i> ADID         | 31 | M--L---LLG--AVL-----LLL---ALP--SHGQ-D--TTTQGP-G----- | 55 |
| <i>Otolemur garnettii</i> ADID     | 1  | M--L---LLQ--AVL-----LLL---ALP--SHGQ-D--TSTEGP-G----- | 26 |
| <i>Mus musculus</i> Adid           | 12 | M--L---LLQ--ALL-----FLL---ILP--SHAE-DDVTTEEL-A-----  | 39 |
| <i>Rattus norvegicus</i> Adid      | 1  | M--L---LLQ--ALL-----FLL---ILP--SHEG-I--TATEGP-G----- | 26 |
| <i>Cavia porcellus</i> ADID        | 43 | M--L---VLR--AVL-----LLL---ALP--SCAQ-E--TSAAES-E----- | 68 |
| <i>Oryctolagus cuniculus</i> ADID  | 11 | M--L---LLQ--AVL-----LLL---ALP--SHGQ-D--STTESP-G----- | 36 |
| <i>Bos taurus</i> ADID             | 1  | M--L---LQG--ALL-----LLL---ALP--SHGE-D--NM-EDP-----   | 24 |
| <i>Equus caballus</i> ADID         | 63 | M--L---LLQ--AVL-----LLL---VLP--SPGE-V--TTTEE-----    | 86 |
| <i>Canis lupus familiaris</i> ADID | 10 | M--L---LLR--AVL-----LLL---VLP--AHGQ-D--SVAEGP-G----- | 35 |
| <i>Felis catus</i> ADID            | 1  | M--L---LLR--AVL-----LLL---VLP--IRGQ-D--SETEGP-G----- | 26 |
| <i>Myotis lucifugus</i> ADID       | 10 | M--L---LLQ--AVL-----LLL---VLP--SRGQ-D--TPTKEP-E----- | 35 |
| <i>Dasyopus novemcinctus</i> ADID  | 1  | M--L---LLQ--AVL-----LLL---ALP--SHGQ-D--TTQEEP-G----- | 27 |
| <i>Loxodonta africana</i> ADID     | 1  | M--L---LLR--AVL-----LLL---ALP--NNGE-N--LATEGP-G----- | 26 |
| <i>Homo sapiens</i> ADIE           | 1  | MR-P---LLV--LLL-----LGL---A---AGS-PPL---D-D-----     | 21 |
| <i>Pan troglodytes</i> ADIE        | 1  | MR-P---LLV--LLL-----LGL---A---AGS-PPL---D-D-----     | 21 |
| <i>Pongo abelii</i> ADIE           | 1  | MR-P---LLV--LLL-----LGL---A---AGS-PPL---D-D-----     | 21 |
| <i>Papio hamadryas</i> ADIE        | 1  | MR-P---LLV--LLL-----LGL---A---AGS-PPL---D-D-----     | 21 |
| <i>Callithrix jacchus</i> ADIE     | 1  | MR-P---LLV--LLL-----LGL---A---ASS-PPL---E-D-----     | 21 |
| <i>Otolemur garnettii</i> ADIE     | 1  | MR-L---LLA--LLF-----LGL---A---AGS-PPL---D-D-----     | 21 |
| <i>Mus musculus</i> Adie           | 1  | MR-P---LLA--LLL-----LGL---V---SGS-PPL---D-D-----     | 21 |
| <i>Rattus norvegicus</i> Adie      | 1  | MR-P---LLA--LLL-----LGL---A---SGS-PPL---D-D-----     | 21 |
| <i>Homo sapiens</i> ADIF1          | 1  | MR-I---WWL--LLA-----IEI-C--TGN--INSQ-D-----          | 21 |
| <i>Homo sapiens</i> ADIF2          | 1  | MR-I---WWL--LLA-----IEI-C--TGN--INSQ-D-----          | 21 |
| <i>Pan troglodytes</i> ADIF1       | 1  | MR-I---WWF--LLA-----IEI-C--TGN--INSQ-D-----          | 21 |
| <i>Pongo abelii</i> ADIF1          | 1  | MR-I---WWF--LLA-----VEI-C--TGN--INSQ-D-----          | 21 |
| <i>Nomascus leucogenys</i> ADIF1   | 1  | MR-I---WWL--LLA-----IEI-C--KGN--INSQ-D-----          | 21 |
| <i>Macaca mulatta</i> ADIF1        | 1  | MR-I---WWF--LLA-----IGI-C--AGN--ISSQ-N-----          | 21 |
| <i>Papio hamadryas</i> ADIF1       | 1  | MR-I---WWF--LLA-----IEI-C--TGN--ISSQ-N-----          | 21 |

|                                     |     |                                                        |     |
|-------------------------------------|-----|--------------------------------------------------------|-----|
| <i>Microcebus murinus</i> ADIF1     | 1   | MK-I---CWL--LLA-----AGI-C--TGN--INAQ-D-----            | 21  |
| <i>Otolemur garnettii</i> ADIF1     | 1   | MK-I---WWL--LLA-----IGI-C--TGN--INAQ-D-----            | 21  |
| <i>Mus musculus</i> Adif1           | 30  | MR-I---WWL--LLV-----MGA-C--TRS--VFSQ-D-----            | 50  |
| <i>Rattus norvegicus</i> Adif1      | 19  | MR-I---WWL--LLV-----MDA---GS--VFSQ-D-----              | 37  |
| <i>Cavia porcellus</i> ADIF1        | 1   | MR-T---WWL--LLA-----LGV-C--TGA--MSSQ-D-----            | 21  |
| <i>Oryctolagus cuniculus</i> ADIF1  | 1   | MR-I---WWL--LLV-----TGV-C--TGS--VSSQ-D-----            | 21  |
| <i>Ochotona princeps</i> ADIF1      | 1   | MR-I---WWL--LLV-----IGV-C--LGS--VSIQ-D-----            | 21  |
| <i>Bos taurus</i> ADIF1             | 1   | MR-I---WWL--LLA-----SGV-C--TGM--VSSQ-D-----            | 21  |
| <i>Equus caballus</i> ADIF1         | 1   | MR-I---WWL--LLV-----TGI-C--TGK--VNSQ-D-----            | 21  |
| <i>Canis lupus familiaris</i> ADIF1 | 1   | MR-I---WLL--LLA-----AGI-C--MGN--VKSQ-D-----            | 21  |
| <i>Felis catus</i> ADIF1            | 1   | MR-T---WLL--LLA-----GGI-C--MGN--VNAQ-D-----            | 21  |
| <i>Dasyopus novemcinctus</i> ADIF1  | 1   | MR-I---WWV--LLA-----IGI-C--MGS--INSQ-D-----            | 22  |
| <i>Loxodonta africana</i> ADIF1     | 1   | MR-F---WWL--LLA-----VGA-C--TGN--INSQ-D-----            | 21  |
| <i>Homo sapiens</i> ADIG            | 55  | M--F---VLL--YVT-S----FAI-C--A----SGQ-PR-GNQLKG-E-----  | 80  |
| <i>Pan troglodytes</i> ADIG         | 55  | M--F---VLL--YVT-S----FAI-C--A----SGQ-PR-GNQLKG-E-----  | 80  |
| <i>Pongo abelii</i> ADIG            | 55  | M--F---VLL--YVT-S----FAI-C--A----SGQ-PR-GNQLKG-E-----  | 80  |
| <i>Callithrix jacchus</i> ADIG      | 41  | M--F---VLL--YVT-S----FAI-C--A----SGQ-PR-GNQLKG-E-----  | 66  |
| <i>Otolemur garnettii</i> ADIG      | 1   | M--F---VLL--YVT-S----FAI-C--A----SGQ-PR-GNQLKG-E-----  | 26  |
| <i>Mus musculus</i> Adig            | 43  | M--I---VLL--YVT-S----LAI-C--A----SGQ-PR-ANQAKG-E-----  | 68  |
| <i>Rattus norvegicus</i> Adig       | 44  | M--I---VLL--YVT-S----LAI-C--A----SGQ-PR-GNQAKG-E-----  | 69  |
| <i>Cavia porcellus</i> ADIG         | 1   | M--F---VLL--YVT-S----FAI-C--A----SGQ-PR-GSQVKG-E-----  | 26  |
| <i>Oryctolagus cuniculus</i> ADIG   | 1   | M--F---VLL--YVT-S----FAL-C--A----SGQ-PR-GHQFKG-E-----  | 26  |
| <i>Tursiops truncatus</i> ADIG      | 53  | M--F---VLL--YVT-S----FAI-C--A----SGQ-PR-GNQFKG-D-----  | 78  |
| <i>Bos taurus</i> ADIG              | 1   | M--F---VLL--YVT-S----FAI-C--A----SGQ-PR-SNQFKG-E-----  | 26  |
| <i>Equus caballus</i> ADIG          | 42  | M--F---VLL--YVT-S----FAI-C--A----SGQ-PR-GSQFKG-D-----  | 67  |
| <i>Canis lupus familiaris</i> ADIG  | 42  | M--F---VLL--YVT-S----FAI-C--A----SGQ-PR-GNQFKG-E-----  | 67  |
| <i>Myotis lucifugus</i> ADIG        | 1   | M--F---VLL--YVT-S----FAI-C--V----SGQ-PR-GNQFKG-E-----  | 26  |
| <i>Homo sapiens</i> ADIH            | 1   | M--I---PWV--LLA-C----ALP-C--A----AD-PLLGAFAFARR-D----- | 26  |
| <i>Pan troglodytes</i> ADIH         | 1   | M--I---PWV--LLA-C----ALP-C--A----AD-PLLGAFAFARR-D----- | 26  |
| <i>Pongo abelii</i> ADIH            | 1   | M--I---PWV--LLA-C----ALP-C--A----AD-PLLGAFAFARR-D----- | 26  |
| <i>Nomascus leucogenys</i> ADIH     | 1   | M--I---PWV--LLA-C----ALP-C--A----AD-PLLGAFAFARR-D----- | 26  |
| <i>Macaca mulatta</i> ADIH          | 1   | M--I---PWV--LLA-C----ALP-C--A----AD-PLLGAFAFARR-D----- | 26  |
| <i>Papio hamadryas</i> ADIH         | 1   | M--I---PWV--LLA-C----ALP-C--A----AD-PLLGAFAFARR-D----- | 26  |
| <i>Mus musculus</i> Adih            | 8   | M--I---SWV--LLA-C----ALP-C--A----AD-PMLGAFAFARR-D----- | 33  |
| <i>Rattus norvegicus</i> Adih       | 45  | M--I---SWM--LLA-C----ALP-C--A----AD-PMLGAFAFARR-D----- | 70  |
| <i>Dipodomys ordii</i> ADIH         | 1   | M--I---PWV--LLA-C----ALP-C--A----AD-PLLGPFARR-D-----   | 26  |
| <i>Cavia porcellus</i> ADIH         | 1   | M--I---PWV--LLA-C----ALP-C--A----AD-PLLAAYARR-D-----   | 26  |
| <i>Bos taurus</i> ADIH              | 18  | M--I---PWV--LLA-C----ALP-C--A----AD-PLLAFAFARR-D-----  | 43  |
| <i>Equus caballus</i> ADIH          | 1   | M--I---PWV--LLA-C----ALP-C--A----AD-PLLGAFAFARR-D----- | 26  |
| <i>Canis lupus familiaris</i> ADIH  | 1   | M--I---PWV--LLA-C----ALP-C--A----AD-PLLGAFAFARR-D----- | 26  |
| <i>Pteropus vampyrus</i> ADIH       | 1   | M--I---PWV--LLA-C----ALP-C--A----AD-PLLGAFARR-D-----   | 26  |
| <i>Loxodonta africana</i> ADIH      | 1   | M--I---SWV--LLA-C----ALP-C--A----TD-PLLGAFAFARR-D----- | 26  |
| <i>Homo sapiens</i> ADII            | 1   | M-----ALG--LLIA---VPLLL---QAAPRGAHAYEMM-----           | 26  |
| <i>Pongo abelii</i> ADII            | 1   | M-----ALG--LLIA---VPLLL---QAAPRAAHAYEMM-----           | 26  |
| <i>Macaca mulatta</i> ADII          | 1   | M-----ALG--LLIA---VPLLL---QAAPPGAHAYEMM-----           | 26  |
| <i>Mus musculus</i> Adii            | 1   | M-----ALG--LLIA---VPLLL---QAAPPGAHAYEML-----           | 26  |
| <i>Rattus norvegicus</i> Adii       | 1   | M-----ALG--LLIA---VPLLL---QAAPPGAHAYEML-----           | 26  |
| <i>Bos taurus</i> ADII              | 1   | M-----ALG--LLIA---VPLLL---QAAPPGAHAYEMM-----           | 26  |
| <i>Canis lupus familiaris</i> ADII  | 1   | M-----ALG--LLIA---VPLLL---QAAPPGAHAYEMM-----           | 26  |
| <i>Dasyopus novemcinctus</i> ADII   | 1   | M-----ALA--LLIA---VPLLL---QAAPPGAHAYEMM-----           | 26  |
| <i>Homo sapiens</i> ADIJ            | 1   | M-----VLL--LVIL---IPVLV---SSA-GTSAHYEML-----           | 25  |
| <i>Pan troglodytes</i> ADIJ         | 1   | M-----VLL--LVIL---IPVLV---SSA-GTSAHYEML-----           | 25  |
| <i>Papio hamadryas</i> ADIJ         | 1   | M-----VLL--LVIL---IPVLV---SSA-GTSAHYEML-----           | 25  |
| <i>Mus musculus</i> Adij            | 1   | M-----VLL--LVIL---IPVLV---SSA-GTSAHYEML-----           | 25  |
| <i>Rattus norvegicus</i> Adij       | 1   | M-----VLL--LVIL---IPVLV---SSA-GTSAHYEML-----           | 25  |
| <i>Oryctolagus cuniculus</i> ADIJ   | 1   | M-----VLL--LVIL---IPVLV---SSA-GTSAHYEML-----           | 25  |
| <i>Bos taurus</i> ADIJ              | 1   | M-----VLL--LVIL---IPVLV---SSA-GTSAHYEML-----           | 25  |
| <i>Canis lupus familiaris</i> ADIJ  | 1   | M-----VLL--LVIL---IPVLV---SSA-GTSAHYEML-----           | 25  |
| <i>Loxodonta africana</i> ADIJ      | 1   | M-----VLL--LVIL---IPVLV---SSA-GTSAHYEML-----           | 25  |
| <i>Homo sapiens</i> ADIK            | 1   | M-----VLL--LLVA---IPLLV---HSS-RGPAHYEML-----           | 25  |
| <i>Pan troglodytes</i> ADIK         | 1   | M-----VLL--LLVA---IPLLV---HSS-RGPAHYEML-----           | 25  |
| <i>Gorilla gorilla</i> ADIK         | 1   | M-----VLL--LLVA---IPLLV---HSS-RGPAHYEML-----           | 25  |
| <i>Papio hamadryas</i> ADIK         | 1   | M-----VLL--LLVA---IPLLV---HSS-RGPAHYEML-----           | 25  |
| <i>Callithrix jacchus</i> ADIK      | 1   | M-----VLL--LLVA---IPLLV---HSS-RGPAHYEML-----           | 25  |
| <i>Rattus norvegicus</i> Adik       | 1   | M-----VLL--LLVA---IPLLV---HSS-RGPTHYEML-----           | 25  |
| <i>Cavia porcellus</i> ADIK         | 1   | M-----VLL--LLVA---IPLLV---HSS-RGPAHYEML-----           | 25  |
| <i>Equus caballus</i> ADIK          | 1   | M-----VLL--LLVA---IPLLV---QSS-RGPAHYEML-----           | 25  |
| <i>Canis lupus familiaris</i> ADIK  | 1   | M-----VLL--LLVA---IPLLV---HSS-RGPAHYEML-----           | 25  |
| <i>Dasyopus novemcinctus</i> ADIK   | 1   | M-----VLL--LLVA---IPLLV---HSS-RGPAHYEML-----           | 25  |
| <i>Loxodonta africana</i> ADIK      | 1   | M-----VLL--LLVA---IPLLV---HSS-REPAHYEML-----           | 25  |
| <i>Mus musculus</i> Adil            | 1   | M-----LLV--LVVL---IPVLV---SSG-GPDGHYEML-----           | 25  |
| <i>Rattus norvegicus</i> Adil       | 1   | M-----LLV--LVVL---IPVLV---SSG-GPDGHYEML-----           | 25  |
| <i>Homo sapiens</i> ADIM            | 112 | M--L-WRQLIY--WQLL--A-LFPLPFC-----LCQDEYMESPQTG-G-----  | 145 |
| <i>Pan troglodytes</i> ADIM         | 112 | M--L-WRQLVY--WQLL--A-LFPLPFC-----LCQDEYMESPQTG-G-----  | 145 |



|                                    |     |                                                              |     |
|------------------------------------|-----|--------------------------------------------------------------|-----|
| <i>Pongo abelii</i> ADIM           | 68  | M--L-WRQLIY--WQLL--A-LFFLPFC-----LCQDEYMESPQTG-G-----        | 101 |
| <i>Nomascus leucogenys</i> ADIM    | 112 | M--L-WRQLVY--WQLL--A-LFFLPFC-----LCQDEYMESPQTG-G-----        | 145 |
| <i>Papio hamadryas</i> ADIM        | 112 | M--L-WRQLVY--WQLL--A-LFFLPFC-----LCQDEYMESPQTG-G-----        | 145 |
| <i>Callithrix jacchus</i> ADIM     | 102 | M--L-WRQLIY--WQLL--A-LFFLPFC-----LCQDEYMESPQTG-G-----        | 135 |
| <i>Mus musculus</i> Adim           | 1   | M--L-GRQRIW--WHLL--P-LLFLPFC-----LCQDEYMESPQAG-G-----        | 34  |
| <i>Rattus norvegicus</i> Adim      | 75  | M--L-RRQLVW--WHLL--A-LFFLPFC-----LCQDEYMESPQAG-G-----        | 108 |
| <i>Cavia porcellus</i> ADIM        | 67  | M--L-GSQCIC--WHLL--A-LFFLPFC-----LCQDDYMEPPQTGGG-----        | 101 |
| <i>Bos taurus</i> ADIM             | 1   | M--L-GRQLVY--WHLL--A-LFFLPFC-----LCQDEYMESPQTG-G-----        | 34  |
| <i>Equus caballus</i> ADIM         | 1   | M--L-RRQLVY--WHLL--A-LFFLPFC-----LCQDEYMESPQTG-G-----        | 34  |
| <i>Canis lupus familiaris</i> ADIM | 62  | M--L-GRQLFY--WHLL--A-LFFLPFC-----LCQDEYMESPQTG-G-----        | 95  |
| <i>Homo sapiens</i> ADIN           | 1   | M-LP----LLL--GLLG----PAA--C-----WA-----                      | 16  |
| <i>Pan troglodytes</i> ADIN        | 1   | M-LP----LLL--GLLG----PAA--C-----WA-----                      | 16  |
| <i>Pongo abelii</i> ADIN           | 1   | M-LP----LLL--VLLG----PAA--C-----WA-----                      | 16  |
| <i>Nomascus leucogenys</i> ADIN    | 1   | M-LP----LLL--GLLG----PAA--C-----WA-----                      | 16  |
| <i>Macaca mulatta</i> ADIN         | 1   | M-LP----LLL--GLLG----PAA--C-----WA-----                      | 16  |
| <i>Callithrix jacchus</i> ADIN     | 1   | M-LP----LLL--GLLG----PVG--C-----WA-----                      | 16  |
| <i>Mus musculus</i> Adin           | 1   | M-LL----LLL--GFLG----PAA--C-----WA-----                      | 16  |
| <i>Cavia porcellus</i> ADIN        | 12  | M-LL----LLF--GLLA----PAT--C-----WA-----                      | 27  |
| <i>Tursiops truncatus</i> ADIN     | 1   | M-LP----LLL--GLLG----PAA--C-----WA-----                      | 16  |
| <i>Canis lupus familiaris</i> ADIN | 1   | M-LL----LLL--GLLG----PAA--C-----WA-----                      | 16  |
| <i>Dasyops novemcinctus</i> ADIN   | 1   | M-LT----LLL--GLLG----PVA--C-----WA-----                      | 16  |
| <i>Loxodonta africana</i> ADIN     | 1   | M-LP----ILL--GLLG----PAA--C-----WA-----                      | 16  |
| <i>Homo sapiens</i> ADIO           | 1   | M--A---A---PALL--L-LALLL-----P-V-GAW-PGL-----                | 21  |
| <i>Pan troglodytes</i> ADIO        | 1   | M--A---A---PALL--L-LALLL-----P-A-GAW-PGL-----                | 21  |
| <i>Macaca mulatta</i> ADIO         | 1   | M--A---A---PTLL--L-LALLL-----P-A-GAW-PGL-----                | 21  |
| <i>Bos taurus</i> ADIO             | 1   | M--V---A---PALL--LLLA--L-----P-A-GAW-RGL-----                | 20  |
| <i>Myotis lucifugus</i> ADIO       | 1   | M--A---A---PGLL--LLLA--L-----P-A-GAW-PRL-----                | 20  |
| <i>Homo sapiens</i> ADIP           | 99  | MGSR---GQG--LLLAYCLLLAFA--S--G-L-V-LSRVPHVQGEQQEWE-----      | 136 |
| <i>Otolemur garnettii</i> ADIP     | 1   | MRSP---GWG--RVLACCLLLAVA--C--G-P-A-LSLVPRIQHEEQEQE-----      | 38  |
| <i>Mus musculus</i> Adip           | 1   | MGSC---AQG--FMLGCCLLLAIT--W--G-P-I-LSLVPVQGEQQEWE-----       | 38  |
| <i>Cavia porcellus</i> ADIP        | 1   | MGSR---GQR--LVLGCCLLLAFA--W--G-L-V-LSHVPRGQGEQQEQE-----      | 38  |
| <i>Bos taurus</i> ADIP             | 26  | MGSR---GLR--LALACCLLLAFA--C--G-L-V-LGRVPHGQGEQQEQE-----      | 63  |
| <i>Equus caballus</i> ADIP         | 1   | MGSR---GLG--LVLACCLLLAFA--C--G-P-V-LGRVPPGQGEQQEQE-----      | 38  |
| <i>Loxodonta africana</i> ADIP     | 44  | MGAL---ALG--LQLGCCLLVLIFA--C--A-P-V-LGRTPRGQQNQQEHEATPGDSKAE | 90  |
| <i>Homo sapiens</i> ADIQ           | 20  | MVTA---ALG--PVWA--ALLLFLLMC--EIPMV-ELTFDRA-----              | 51  |
| <i>Pan troglodytes</i> ADIQ        | 20  | MGTA---ALG--PLWA--ALLLFLLMC--EIPMV-ELTFDRA-----              | 51  |
| <i>Pongo abelii</i> ADIQ           | 20  | MGTA---ALG--PLWA--ALLLFLLMC--EIPTV-ELTFDRA-----              | 51  |
| <i>Nomascus leucogenys</i> ADIQ    | 20  | MGTA---TLG--PLWA--VLLLFLLMC--EIPTV-ELTFDRA-----              | 51  |
| <i>Macaca mulatta</i> ADIQ         | 20  | MGTA---ALG--PLWA--VLLLFLLMC--EVPKV-ELTFDRA-----              | 51  |
| <i>Mus musculus</i> Adiq           | 5   | MGIA---SIG--FLWA--VFLLPLVVF--GVPTE-ETTFGES-----              | 35  |
| <i>Rattus norvegicus</i> Adiq      | 5   | MGTA---SIG--SIWA--VFLLPLVVF--GVPTE-EPTFGES-----              | 35  |
| <i>Homo sapiens</i> ADIR           | 1   | M--TP---VDV--PVTN----PAA-----TI-----                         | 15  |
| <i>Pan troglodytes</i> ADIR        | 1   | M--TP---VDV--PVTN----PAA-----TI-----                         | 15  |
| <i>Pongo abelii</i> ADIR           | 1   | M--TP---VDV--PVTN----PAA-----TI-----                         | 15  |
| <i>Nomascus leucogenys</i> ADIR    | 1   | M--TP---VDV--PVTN----PAA-----TI-----                         | 15  |
| <i>Macaca mulatta</i> ADIR         | 1   | M--TP---VDV--PVTN----PAA-----TI-----                         | 15  |
| <i>Papio hamadryas</i> ADIR        | 1   | M--TP---VDV--PVTN----PAA-----TI-----                         | 15  |
| <i>Callithrix jacchus</i> ADIR     | 1   | M--TP---VDV--PVSN----PAA-----TI-----                         | 15  |
| <i>Tarsius syrichta</i> ADIR       | 1   | M--TP---VDV--PVTN----PAA-----TI-----                         | 15  |
| <i>Otolemur garnettii</i> ADIR     | 1   | M--TP---VDV--PVTN----PAA-----TV-----                         | 15  |
| <i>Tupaia belangeri</i> ADIR       | 1   | M--TP---VDV--PVTN----PAA-----TI-----                         | 15  |
| <i>Mus musculus</i> Adir           | 1   | M--TP---VDV--PVTS----PAA-----AI-----                         | 15  |
| <i>Rattus norvegicus</i> Adir      | 1   | M--TP---VDV--PVTS----PAA-----AI-----                         | 15  |
| <i>Cavia porcellus</i> ADIR        | 1   | M--TP---VDV--PVTN----PAA-----TL-----                         | 15  |
| <i>Oryctolagus cuniculus</i> ADIR  | 1   | M--TP---VDV--PVTN----PAA-----TI-----                         | 15  |
| <i>Tursiops truncatus</i> ADIR     | 1   | M--TP---VDV--PVTN----PAA-----TI-----                         | 15  |
| <i>Bos taurus</i> ADIR             | 1   | M--TP---VDV--PVTN----PAA-----TI-----                         | 15  |
| <i>Equus caballus</i> ADIR         | 1   | M--TP---VDV--PVTN----PAA-----TI-----                         | 15  |
| <i>Canis lupus familiaris</i> ADIR | 1   | M--TP---VDV--PVTN----PAA-----TI-----                         | 15  |
| <i>Myotis lucifugus</i> ADIR       | 1   | M--TP---VDV--PVTN----PAA-----TI-----                         | 15  |
| <i>Pteropus vampyrus</i> ADIR      | 1   | M--TP---VDV--PVTS----PAA-----TI-----                         | 15  |
| <i>Erinaceus europaeus</i> ADIR    | -   | -                                                            | -   |
| <i>Dasyops novemcinctus</i> ADIR   | 1   | M--TP---VDV--PVTS----PAT-----TI-----                         | 15  |
| <i>Choloepus hoffmanni</i> ADIR    | 1   | M--TP---VDV--PVTN----PAA-----TI-----                         | 15  |
| <i>Loxodonta africana</i> ADIR     | 1   | M--TP---VDV--PVTN----PAA-----TI-----                         | 15  |

|                                    |    |       |             |       |     |     |     |
|------------------------------------|----|-------|-------------|-------|-----|-----|-----|
| <i>Homo sapiens</i> ADIA           | 30 | ----- | Sc          | ----- | 31  |     |     |
|                                    |    | 190   | 200         | 210   | 220 | 230 | 240 |
| <i>Homo sapiens</i> ADIA           | 30 | ----- | Sc          | ----- | 31  |     |     |
| <i>Papio hamadryas</i> ADIA        | 30 | ----- | Sc          | ----- | 31  |     |     |
| <i>Mus musculus</i> Adia           | 57 | ----- | Sc          | ----- | 58  |     |     |
| <i>Rattus norvegicus</i> Adia      | 28 | ----- | Sc          | ----- | 29  |     |     |
| <i>Cavia porcellus</i> ADIA        | 28 | ----- | Sc          | ----- | 29  |     |     |
| <i>Ochotona princeps</i> ADIA      | 28 | ----- | Sc          | ----- | 29  |     |     |
| <i>Bos taurus</i> ADIA             | 25 | ----- | Nc          | ----- | 26  |     |     |
| <i>Equus caballus</i> ADIA         | 29 | ----- | Sc          | ----- | 30  |     |     |
| <i>Canis lupus familiaris</i> ADIA | 27 | ----- | Sc          | ----- | 28  |     |     |
| <i>Felis catus</i> ADIA            | 31 | ----- | Sc          | ----- | 32  |     |     |
| <i>Myotis lucifugus</i> ADIA       | 28 | ----- | Dc          | ----- | 29  |     |     |
| <i>Dasytus novemcinctus</i> ADIA   | 25 | ----- | Sc          | ----- | 26  |     |     |
| <i>Loxodonta africana</i> ADIA     | 28 | ----- | Sc          | ----- | 29  |     |     |
| <i>Homo sapiens</i> ADIB           | 31 | ----- | Gc          | ----- | 32  |     |     |
| <i>Pan troglodytes</i> ADIB        | 31 | ----- | Gc          | ----- | 32  |     |     |
| <i>Pongo abelii</i> ADIB           | 31 | ----- | Gc          | ----- | 32  |     |     |
| <i>Nomascus leucogenys</i> ADIB    | 32 | ----- | Gc          | ----- | 33  |     |     |
| <i>Callithrix jacchus</i> ADIB     | 30 | ----- | Gc          | ----- | 31  |     |     |
| <i>Otolemur garnettii</i> ADIB     | 29 | ----- | Gc          | ----- | 30  |     |     |
| <i>Mus musculus</i> Adib           | 62 | ----- | Gc          | ----- | 63  |     |     |
| <i>Rattus norvegicus</i> Adib      | 54 | ----- | Gc          | ----- | 55  |     |     |
| <i>Cavia porcellus</i> ADIB        | 78 | ----- | Gc          | ----- | 79  |     |     |
| <i>Oryctolagus cuniculus</i> ADIB  | 84 | ----- | Dc          | ----- | 85  |     |     |
| <i>Bos taurus</i> ADIB             | 29 | ----- | Yc          | ----- | 30  |     |     |
| <i>Equus caballus</i> ADIB         | 49 | ----- | Dc          | ----- | 50  |     |     |
| <i>Canis lupus familiaris</i> ADIB | 31 | ----- | Gc          | ----- | 32  |     |     |
| <i>Myotis lucifugus</i> ADIB       | 31 | ----- | Ec          | ----- | 32  |     |     |
| <i>Loxodonta africana</i> ADIB     | 29 | ----- | Sc          | ----- | 30  |     |     |
| <i>Homo sapiens</i> ADIC           | 25 | ----- | Lc          | ----- | 26  |     |     |
| <i>Macaca mulatta</i> ADIC         | 25 | ----- | Vc          | ----- | 26  |     |     |
| <i>Papio hamadryas</i> ADIC        | 25 | ----- | Vc          | ----- | 26  |     |     |
| <i>Callithrix jacchus</i> ADIC     | 25 | ----- | Vc          | ----- | 26  |     |     |
| <i>Mus musculus</i> Adic           | 25 | ----- | Vc          | ----- | 26  |     |     |
| <i>Rattus norvegicus</i> Adic      | 37 | ----- | Vc          | ----- | 38  |     |     |
| <i>Cavia porcellus</i> ADIC        | 24 | ----- | Vc          | ----- | 25  |     |     |
| <i>Oryctolagus cuniculus</i> ADIC  | 66 | ----- | Vc          | ----- | 67  |     |     |
| <i>Equus caballus</i> ADIC         | 58 | ----- | Vc          | ----- | 59  |     |     |
| <i>Canis lupus familiaris</i> ADIC | 44 | ----- | Vc          | ----- | 45  |     |     |
| <i>Myotis lucifugus</i> ADIC       | 25 | ----- | Vc          | ----- | 26  |     |     |
| <i>Loxodonta africana</i> ADIC     | 40 | ----- | Tc          | ----- | 41  |     |     |
| <i>Homo sapiens</i> ADID           | 58 | ----- | VLLPLPKGAC  | ----- | 67  |     |     |
| <i>Pan troglodytes</i> ADID        | 58 | ----- | VLLPLPKGAC  | ----- | 67  |     |     |
| <i>Pongo abelii</i> ADID           | 27 | ----- | VLLPLPKGAC  | ----- | 36  |     |     |
| <i>Nomascus leucogenys</i> ADID    | 57 | ----- | VLLPLPKGAC  | ----- | 66  |     |     |
| <i>Macaca mulatta</i> ADID         | 56 | ----- | VLLPLPKGAC  | ----- | 65  |     |     |
| <i>Otolemur garnettii</i> ADID     | 27 | ----- | VGLPLPKGAC  | ----- | 36  |     |     |
| <i>Mus musculus</i> Adid           | 40 | ----- | PALVPPPKGTC | ----- | 50  |     |     |
| <i>Rattus norvegicus</i> Adid      | 27 | ----- | ALVPPPKETC  | ----- | 36  |     |     |
| <i>Cavia porcellus</i> ADID        | 69 | ----- | VPLLLPKGAC  | ----- | 78  |     |     |
| <i>Oryctolagus cuniculus</i> ADID  | 37 | ----- | VLIPAPKGAC  | ----- | 46  |     |     |
| <i>Bos taurus</i> ADID             | 25 | ----- | PLPKGAC     | ----- | 31  |     |     |
| <i>Equus caballus</i> ADID         | 87 | ----- | TLPKEGC     | ----- | 93  |     |     |
| <i>Canis lupus familiaris</i> ADID | 36 | ----- | VLLPLPKGAC  | ----- | 45  |     |     |
| <i>Felis catus</i> ADID            | 27 | ----- | VVVPLPKGAC  | ----- | 36  |     |     |
| <i>Myotis lucifugus</i> ADID       | 36 | ----- | VQLPLPKGVC  | ----- | 45  |     |     |
| <i>Dasytus novemcinctus</i> ADID   | 28 | ----- | VLLLPKGAC   | ----- | 37  |     |     |
| <i>Loxodonta africana</i> ADID     | 27 | ----- | VLLSPPKERc  | ----- | 36  |     |     |
| <i>Homo sapiens</i> ADIE           | 22 | ----- | NKI-PSL-C   | ----- | 28  |     |     |
| <i>Pan troglodytes</i> ADIE        | 22 | ----- | NKI-PSL-C   | ----- | 28  |     |     |
| <i>Pongo abelii</i> ADIE           | 22 | ----- | NKI-PSL-C   | ----- | 28  |     |     |
| <i>Papio hamadryas</i> ADIE        | 22 | ----- | NKI-PSL-C   | ----- | 28  |     |     |
| <i>Callithrix jacchus</i> ADIE     | 22 | ----- | NKI-PSL-C   | ----- | 28  |     |     |
| <i>Otolemur garnettii</i> ADIE     | 22 | ----- | NKI-PSL-C   | ----- | 28  |     |     |
| <i>Mus musculus</i> Adie           | 22 | ----- | NKI-PSL-C   | ----- | 28  |     |     |
| <i>Rattus norvegicus</i> Adie      | 22 | ----- | NKI-PSL-C   | ----- | 28  |     |     |
| <i>Homo sapiens</i> ADIF1          | 22 | ----- | Tc          | ----- | 23  |     |     |
| <i>Homo sapiens</i> ADIF2          | 22 | ----- | Tc          | ----- | 23  |     |     |
| <i>Pan troglodytes</i> ADIF1       | 22 | ----- | Tc          | ----- | 23  |     |     |
| <i>Pongo abelii</i> ADIF1          | 22 | ----- | Tc          | ----- | 23  |     |     |
| <i>Nomascus leucogenys</i> ADIF1   | 22 | ----- | Tc          | ----- | 23  |     |     |
| <i>Macaca mulatta</i> ADIF1        | 22 | ----- | Tc          | ----- | 23  |     |     |
| <i>Papio hamadryas</i> ADIF1       | 22 | ----- | Tc          | ----- | 23  |     |     |

|                                     |     |                                   |     |
|-------------------------------------|-----|-----------------------------------|-----|
| <i>Microcebus murinus</i> ADIF1     | 22  | -----TC-----                      | 23  |
| <i>Otolemur garnettii</i> ADIF1     | 22  | -----TC-----                      | 23  |
| <i>Mus musculus</i> Adif1           | 51  | -----TC-----                      | 52  |
| <i>Rattus norvegicus</i> Adif1      | 38  | -----TC-----                      | 39  |
| <i>Cavia porcellus</i> ADIF1        | 22  | -----TC-----                      | 23  |
| <i>Oryctolagus cuniculus</i> ADIF1  | 22  | -----TC-----                      | 23  |
| <i>Ochotona princeps</i> ADIF1      | 22  | -----TC-----                      | 23  |
| <i>Bos taurus</i> ADIF1             | 22  | -----TC-----                      | 23  |
| <i>Equus caballus</i> ADIF1         | 22  | -----TC-----                      | 23  |
| <i>Canis lupus familiaris</i> ADIF1 | 22  | -----TC-----                      | 23  |
| <i>Felis catus</i> ADIF1            | 22  | -----TC-----                      | 23  |
| <i>Dasyopus novemcinctus</i> ADIF1  | 23  | -----TC-----                      | 24  |
| <i>Loxodonta africana</i> ADIF1     | 22  | -----MC-----                      | 23  |
| <i>Homo sapiens</i> ADIG            | 81  | -----NYSPLYIC-----                | 88  |
| <i>Pan troglodytes</i> ADIG         | 81  | -----NYSPLYIC-----                | 88  |
| <i>Pongo abelii</i> ADIG            | 81  | -----NYSPLYIC-----                | 88  |
| <i>Callithrix jacchus</i> ADIG      | 67  | -----NYSPLYIC-----                | 74  |
| <i>Otolemur garnettii</i> ADIG      | 27  | -----NYSPLYIC-----                | 34  |
| <i>Mus musculus</i> Adig            | 69  | -----SYSPRYIC-----                | 76  |
| <i>Rattus norvegicus</i> Adig       | 70  | -----SYSPRYIC-----                | 77  |
| <i>Cavia porcellus</i> ADIG         | 27  | -----SYSPRYIC-----                | 34  |
| <i>Oryctolagus cuniculus</i> ADIG   | 27  | -----SYTPRYIC-----                | 34  |
| <i>Tursiops truncatus</i> ADIG      | 79  | -----SYSPRYIC-----                | 86  |
| <i>Bos taurus</i> ADIG              | 27  | -----SYSPRYIC-----                | 34  |
| <i>Equus caballus</i> ADIG          | 68  | -----SYSPRYIC-----                | 75  |
| <i>Canis lupus familiaris</i> ADIG  | 68  | -----SYSPRYIC-----                | 75  |
| <i>Myotis lucifugus</i> ADIG        | 27  | -----SYAPRYIC-----                | 34  |
| <i>Homo sapiens</i> ADIH            | 27  | -----FRKGSPQLVC-----              | 36  |
| <i>Pan troglodytes</i> ADIH         | 27  | -----FRKGSPQLIC-----              | 36  |
| <i>Pongo abelii</i> ADIH            | 27  | -----FRKSSPQLVC-----              | 36  |
| <i>Nomascus leucogenys</i> ADIH     | 27  | -----FRKGSPQLVC-----              | 36  |
| <i>Macaca mulatta</i> ADIH          | 27  | -----FRKGSPQLVC-----              | 36  |
| <i>Papio hamadryas</i> ADIH         | 27  | -----FRKGSPQLVC-----              | 36  |
| <i>Mus musculus</i> Adih            | 34  | -----FQKGGPQLVC-----              | 43  |
| <i>Rattus norvegicus</i> Adih       | 71  | -----FQKGGPQLVC-----              | 80  |
| <i>Dipodomys ordii</i> ADIH         | 27  | -----FQKGAPQLIC-----              | 36  |
| <i>Cavia porcellus</i> ADIH         | 27  | -----FQKGGPQLVC-----              | 36  |
| <i>Bos taurus</i> ADIH              | 44  | -----FQKGGPQLIC-----              | 53  |
| <i>Equus caballus</i> ADIH          | 27  | -----FQKGGPQLVC-----              | 36  |
| <i>Canis lupus familiaris</i> ADIH  | 27  | -----FQKGGPQLVC-----              | 36  |
| <i>Pteropus vampyrus</i> ADIH       | 27  | -----FQKSSQLVC-----               | 36  |
| <i>Loxodonta africana</i> ADIH      | 27  | -----IKKGGPQLIC-----              | 36  |
| <i>Homo sapiens</i> ADII            | 27  | -----GTCRMIC-DP-YTAA-PGGEPGAKAQP  | 51  |
| <i>Pongo abelii</i> ADII            | 27  | -----GTCRMIC-DP-YTAA-PGGGPAGAKAQP | 51  |
| <i>Macaca mulatta</i> ADII          | 27  | -----GTCRMIC-DP-YTAA-PGGGPAGAKAQP | 51  |
| <i>Mus musculus</i> Adii            | 27  | -----GTCRMIC-DP-YSVA-PAGGPAGAKAPP | 51  |
| <i>Rattus norvegicus</i> Adii       | 27  | -----GTCRMIC-DP-YTVS-PAGGPAGAKAPP | 51  |
| <i>Bos taurus</i> ADII              | 27  | -----GTCRMIC-DP-YTAA-PGAGPAGAKAPP | 51  |
| <i>Canis lupus familiaris</i> ADII  | 27  | -----GTCRMIC-DP-YGAA-PAGGPAGAKAPP | 51  |
| <i>Dasyopus novemcinctus</i> ADII   | 27  | -----GTCRMIC-DP-YSAS-PGGGPAGAKAPP | 51  |
| <i>Homo sapiens</i> ADIJ            | 26  | -----GTCRMVC-DP-YG-----GTKA--     | 40  |
| <i>Pan troglodytes</i> ADIJ         | 26  | -----GTCRMVC-DP-YG-----GTKA--     | 40  |
| <i>Papio hamadryas</i> ADIJ         | 26  | -----GTCRMVC-DP-YG-----GTKA--     | 40  |
| <i>Mus musculus</i> Adij            | 26  | -----GTCRMVC-DP-YG-----GTKA--     | 40  |
| <i>Rattus norvegicus</i> Adij       | 26  | -----GTCRMVC-DP-YG-----GTKA--     | 40  |
| <i>Oryctolagus cuniculus</i> ADIJ   | 26  | -----GTCRMVC-DP-YG-----GTKA--     | 40  |
| <i>Bos taurus</i> ADIJ              | 26  | -----GTCRMVC-DP-YG-----GTKA--     | 40  |
| <i>Canis lupus familiaris</i> ADIJ  | 26  | -----GTCRMVC-DP-YG-----GTKA--     | 40  |
| <i>Loxodonta africana</i> ADIJ      | 26  | -----GTCRMVC-DP-YG-----GTKA--     | 40  |
| <i>Homo sapiens</i> ADIK            | 26  | -----GRCRMVC-DP-H-----            | 35  |
| <i>Pan troglodytes</i> ADIK         | 26  | -----GRCRMVC-DP-H-----            | 35  |
| <i>Gorilla gorilla</i> ADIK         | 26  | -----GRCRMVC-DP-H-----            | 35  |
| <i>Papio hamadryas</i> ADIK         | 26  | -----GRCRMVC-DP-H-----            | 35  |
| <i>Callithrix jacchus</i> ADIK      | 26  | -----GRCRMVC-DP-H-----            | 35  |
| <i>Rattus norvegicus</i> Adik       | 26  | -----GRCRMVC-DP-H-----            | 35  |
| <i>Cavia porcellus</i> ADIK         | 26  | -----GRCRMVC-DP-H-----            | 35  |
| <i>Equus caballus</i> ADIK          | 26  | -----GRCRMVC-DP-H-----            | 35  |
| <i>Canis lupus familiaris</i> ADIK  | 26  | -----GRCRMVC-DP-H-----            | 35  |
| <i>Dasyopus novemcinctus</i> ADIK   | 26  | -----GRCRMVC-DP-H-----            | 35  |
| <i>Loxodonta africana</i> ADIK      | 26  | -----GRCRMVC-DP-H-----            | 35  |
| <i>Mus musculus</i> Adil            | 26  | -----GTCRMVC-DP-YPARGPGA---GARSD- | 47  |
| <i>Rattus norvegicus</i> Adil       | 26  | -----GTCRMVC-DP-YPARGPGA---GARSD- | 47  |
| <i>Homo sapiens</i> ADIM            | 146 | -----LP-PDCSK-CC---H-----         | 155 |
| <i>Pan troglodytes</i> ADIM         | 146 | -----LP-PDCSK-CC---H-----         | 155 |

|                                    |     |                                                              |     |
|------------------------------------|-----|--------------------------------------------------------------|-----|
| <i>Pongo abelii</i> ADIM           | 102 | -----LP-PDCSK-CC---H-----                                    | 111 |
| <i>Nomascus leucogenys</i> ADIM    | 146 | -----LP-PDCSK-CC---H-----                                    | 155 |
| <i>Papio hamadryas</i> ADIM        | 146 | -----LP-PDCSK-CC---H-----                                    | 155 |
| <i>Callithrix jacchus</i> ADIM     | 136 | -----MA-PDCSK-CC---H-----                                    | 145 |
| <i>Mus musculus</i> Adim           | 35  | -----LP-PDCSK-CC---H-----                                    | 44  |
| <i>Rattus norvegicus</i> Adim      | 109 | -----LP-PDCSK-CC---H-----                                    | 118 |
| <i>Cavia porcellus</i> ADIM        | 102 | -----LP-PDCSK-CC---H-----                                    | 111 |
| <i>Bos taurus</i> ADIM             | 35  | -----LP-PDCSK-CC---H-----                                    | 44  |
| <i>Equus caballus</i> ADIM         | 35  | -----LP-PDCSK-CC---H-----                                    | 44  |
| <i>Canis lupus familiaris</i> ADIM | 96  | -----LP-PDCSK-CC---H-----                                    | 105 |
| <i>Homo sapiens</i> ADIN           | -   | -----                                                        | -   |
| <i>Pan troglodytes</i> ADIN        | -   | -----                                                        | -   |
| <i>Pongo abelii</i> ADIN           | -   | -----                                                        | -   |
| <i>Nomascus leucogenys</i> ADIN    | -   | -----                                                        | -   |
| <i>Macaca mulatta</i> ADIN         | -   | -----                                                        | -   |
| <i>Callithrix jacchus</i> ADIN     | -   | -----                                                        | -   |
| <i>Mus musculus</i> Adin           | -   | -----                                                        | -   |
| <i>Cavia porcellus</i> ADIN        | -   | -----                                                        | -   |
| <i>Tursiops truncatus</i> ADIN     | -   | -----                                                        | -   |
| <i>Canis lupus familiaris</i> ADIN | -   | -----                                                        | -   |
| <i>Dasyopus novemcinctus</i> ADIN  | -   | -----                                                        | -   |
| <i>Loxodonta africana</i> ADIN     | -   | -----                                                        | -   |
| <i>Homo sapiens</i> ADIO           | 22  | -----PRRPCVH-CCRPAPW---PG--P-YARVS-                          | 43  |
| <i>Pan troglodytes</i> ADIO        | 22  | -----PRRPCVH-CCRPAPW---PG--P-YARVS-                          | 43  |
| <i>Macaca mulatta</i> ADIO         | 22  | -----PRRPCVH-CCHPAWP---PG--P-YARVS-                          | 43  |
| <i>Bos taurus</i> ADIO             | 21  | -----GLPRRPCVQ-CCHPAWPPAAPG--P-GAHVS-                        | 47  |
| <i>Myotis lucifugus</i> ADIO       | 21  | -----GPPHRPCVH-CCHPAWPPAAPG--S-YTPEG-                        | 47  |
| <i>Homo sapiens</i> ADIP           | 137 | GTEELPSPPDHAERAEEOHEKYRPSQDQGLPASRCLR-CCDPGTS---MY--P-ATAV-- | 187 |
| <i>Otolemur garnettii</i> ADIP     | 39  | GTKEPPTPPDHTDRAEEKHEKYRPSQGEELPTSQCFR-CCDPAAP---LY--P-VAPV-- | 89  |
| <i>Mus musculus</i> Adip           | 39  | ETEELPSPLDPVTRPEETREKYSRQGEDLPTSRCYR-CCDPSTP---VY--Q-TIPP--  | 89  |
| <i>Cavia porcellus</i> ADIP        | 39  | GTQKPPPLMDHAERDEDKHEKYSTSLGEELPASQCFR-CCDPGTP---VY--Q-GIPV-- | 89  |
| <i>Bos taurus</i> ADIP             | 64  | GTREPP--MDHAERDEEEHEKYGPRQDEEAPASRCLR-CCDPGTP---VY--Q-AIPV-- | 112 |
| <i>Equus caballus</i> ADIP         | 39  | GTREPP--LDPARTTEKHEKYNPKQGEETASRCLR-CCDPGTP---VY--Q-AIPV--   | 87  |
| <i>Loxodonta africana</i> ADIP     | 91  | GTKEPPPPRGHPERAEEHEKYSPRQAEPPASRCLR-CCDPSAP---VY--Q-PIPV--   | 141 |
| <i>Homo sapiens</i> ADIQ           | 52  | -----VAS----G-CQR-CCDSEDP---LD--P--AHVS-                     | 72  |
| <i>Pan troglodytes</i> ADIQ        | 52  | -----VAS----G-CQR-CCDSEDP---LD--P--AHVS-                     | 72  |
| <i>Pongo abelii</i> ADIQ           | 52  | -----VAS----G-CQR-CCDSEDP---LD--P--AHVS-                     | 72  |
| <i>Nomascus leucogenys</i> ADIQ    | 52  | -----VAS----S-CQR-CCDSEDP---LD--P--AHVS-                     | 72  |
| <i>Macaca mulatta</i> ADIQ         | 52  | -----VAS----G-CQR-CCDSEDP---LD--P--AHVS-                     | 72  |
| <i>Mus musculus</i> Adiq           | 36  | -----VASHLPKG-CRR-CCDPEDL---MS--S--DDTV-                     | 60  |
| <i>Rattus norvegicus</i> Adiq      | 36  | -----VASHLPKN-CQR-CCDPEDP---LS--P--ADTV-                     | 60  |
| <i>Homo sapiens</i> ADIR           | -   | -----                                                        | -   |
| <i>Pan troglodytes</i> ADIR        | -   | -----                                                        | -   |
| <i>Pongo abelii</i> ADIR           | -   | -----                                                        | -   |
| <i>Nomascus leucogenys</i> ADIR    | -   | -----                                                        | -   |
| <i>Macaca mulatta</i> ADIR         | -   | -----                                                        | -   |
| <i>Papio hamadryas</i> ADIR        | -   | -----                                                        | -   |
| <i>Callithrix jacchus</i> ADIR     | -   | -----                                                        | -   |
| <i>Tarsius syrichta</i> ADIR       | -   | -----                                                        | -   |
| <i>Otolemur garnettii</i> ADIR     | -   | -----                                                        | -   |
| <i>Tupaia belangeri</i> ADIR       | -   | -----                                                        | -   |
| <i>Mus musculus</i> Adir           | -   | -----                                                        | -   |
| <i>Rattus norvegicus</i> Adir      | -   | -----                                                        | -   |
| <i>Cavia porcellus</i> ADIR        | -   | -----                                                        | -   |
| <i>Oryctolagus cuniculus</i> ADIR  | -   | -----                                                        | -   |
| <i>Tursiops truncatus</i> ADIR     | -   | -----                                                        | -   |
| <i>Bos taurus</i> ADIR             | -   | -----                                                        | -   |
| <i>Equus caballus</i> ADIR         | -   | -----                                                        | -   |
| <i>Canis lupus familiaris</i> ADIR | -   | -----                                                        | -   |
| <i>Myotis lucifugus</i> ADIR       | -   | -----                                                        | -   |
| <i>Pteropus vampyrus</i> ADIR      | -   | -----                                                        | -   |
| <i>Erinaceus europaeus</i> ADIR    | -   | -----                                                        | -   |
| <i>Dasyopus novemcinctus</i> ADIR  | -   | -----                                                        | -   |
| <i>Choloepus hoffmanni</i> ADIR    | -   | -----                                                        | -   |
| <i>Loxodonta africana</i> ADIR     | -   | -----                                                        | -   |

|                                    |    |                                                       |     |     |
|------------------------------------|----|-------------------------------------------------------|-----|-----|
| <i>Homo sapiens</i> ADIA           | 32 | -----TGP-PAIPGIP-----                                 | GIP | 44  |
| <i>Homo sapiens</i> ADIA           | 32 | -----250-----260-----270-----280-----290-----300----- | GIP | 44  |
| <i>Papio hamadryas</i> ADIA        | 32 | -----TGP-PAIPGTP-----                                 | GIP | 44  |
| <i>Mus musculus</i> Adia           | 59 | -----TGP-PGIPGIP-----                                 | GVP | 71  |
| <i>Rattus norvegicus</i> Adia      | 30 | -----TGS-PGIPGVP-----                                 | GIP | 42  |
| <i>Cavia porcellus</i> ADIA        | 30 | -----VGH-PAIPGIP-----                                 | GIP | 42  |
| <i>Ochotona princeps</i> ADIA      | 30 | -----SGH-PAIPGTP-----                                 | GIP | 42  |
| <i>Bos taurus</i> ADIA             | 27 | -----I-R-PSIPGIP-----                                 | GIP | 38  |
| <i>Equus caballus</i> ADIA         | 31 | -----PAS-QGIPGIP-----                                 | GIP | 43  |
| <i>Canis lupus familiaris</i> ADIA | 29 | -----TGH-PAIPGIP-----                                 | GIP | 41  |
| <i>Felis catus</i> ADIA            | 33 | -----TGH-PAIPGIP-----                                 | GIP | 45  |
| <i>Myotis lucifugus</i> ADIA       | 30 | -----TGP-AAIPGIP-----                                 | GIP | 42  |
| <i>Dasyopus novemcinctus</i> ADIA  | 27 | -----TGP-ATIPGTP-----                                 | GIP | 39  |
| <i>Loxodonta africana</i> ADIA     | 30 | -----SGP-RTIPGIP-----                                 | GIP | 42  |
| <i>Homo sapiens</i> ADIB           | 33 | -----Y-----GIP-----                                   | GMP | 39  |
| <i>Pan troglodytes</i> ADIB        | 33 | -----Y-----GIP-----                                   | GMP | 39  |
| <i>Pongo abelii</i> ADIB           | 33 | -----Y-----GIP-----                                   | GMP | 39  |
| <i>Nomascus leucogenys</i> ADIB    | 34 | -----Y-----GIP-----                                   | GMP | 40  |
| <i>Callithrix jacchus</i> ADIB     | 32 | -----Y-----GIP-----                                   | GMP | 38  |
| <i>Otolemur garnettii</i> ADIB     | 31 | -----Y-----GIP-----                                   | GMP | 37  |
| <i>Mus musculus</i> Adib           | 64 | -----Y-----GIP-----                                   | GMP | 70  |
| <i>Rattus norvegicus</i> Adib      | 56 | -----Y-----GIP-----                                   | GMP | 62  |
| <i>Cavia porcellus</i> ADIB        | 80 | -----Y-----GIP-----                                   | GMP | 86  |
| <i>Oryctolagus cuniculus</i> ADIB  | 86 | -----Y-----GIP-----                                   | GMP | 92  |
| <i>Bos taurus</i> ADIB             | 31 | -----Y-----GIP-----                                   | GMP | 37  |
| <i>Equus caballus</i> ADIB         | 51 | -----Y-----GIP-----                                   | GMP | 57  |
| <i>Canis lupus familiaris</i> ADIB | 33 | -----Y-----GIP-----                                   | GMP | 39  |
| <i>Myotis lucifugus</i> ADIB       | 33 | -----Y-----GIP-----                                   | GMP | 39  |
| <i>Loxodonta africana</i> ADIB     | 31 | -----Y-----GIP-----                                   | GMP | 37  |
| <i>Homo sapiens</i> ADIC           | 27 | -----RAP-D---GKK-----                                 | GEA | 36  |
| <i>Macaca mulatta</i> ADIC         | 27 | -----RAP-D---GKN-----                                 | GVA | 36  |
| <i>Papio hamadryas</i> ADIC        | 27 | -----RAP-D---GKN-----                                 | GVA | 36  |
| <i>Callithrix jacchus</i> ADIC     | 27 | -----QAP-N---GKD-----                                 | GVA | 36  |
| <i>Mus musculus</i> Adic           | 27 | -----RAP-N---GKD-----                                 | GAP | 36  |
| <i>Rattus norvegicus</i> Adic      | 39 | -----RAP-N---GKD-----                                 | GVA | 48  |
| <i>Cavia porcellus</i> ADIC        | 26 | -----RAP-N---GKD-----                                 | GAA | 35  |
| <i>Oryctolagus cuniculus</i> ADIC  | 68 | -----RAP-D---GKD-----                                 | GAA | 77  |
| <i>Equus caballus</i> ADIC         | 60 | -----RAL-N---GKD-----                                 | GAP | 69  |
| <i>Canis lupus familiaris</i> ADIC | 46 | -----RAL-D---GRD-----                                 | GAA | 55  |
| <i>Myotis lucifugus</i> ADIC       | 27 | -----RAP-D---GRD-----                                 | GVA | 36  |
| <i>Loxodonta africana</i> ADIC     | 42 | -----RAP-D---GTD-----                                 | GTP | 51  |
| <i>Homo sapiens</i> ADID           | 68 | -----TG---WMAGIP-----                                 | GHP | 78  |
| <i>Pan troglodytes</i> ADID        | 68 | -----TG---WMAGIP-----                                 | GHP | 78  |
| <i>Pongo abelii</i> ADID           | 37 | -----TG---WMAGIP-----                                 | GHP | 47  |
| <i>Nomascus leucogenys</i> ADID    | 67 | -----TG---WMAGIP-----                                 | GHP | 77  |
| <i>Macaca mulatta</i> ADID         | 66 | -----TG---WMAGIP-----                                 | GHP | 76  |
| <i>Otolemur garnettii</i> ADID     | 37 | -----MG---WMAGIP-----                                 | GHP | 47  |
| <i>Mus musculus</i> Adid           | 51 | -----AG---WMAGIP-----                                 | GHP | 61  |
| <i>Rattus norvegicus</i> Adid      | 37 | -----AG---WMAGIP-----                                 | GYP | 47  |
| <i>Cavia porcellus</i> ADID        | 79 | -----AG---WMAGIP-----                                 | GHP | 89  |
| <i>Oryctolagus cuniculus</i> ADID  | 47 | -----AG---WIAGIP-----                                 | GHP | 57  |
| <i>Bos taurus</i> ADID             | 32 | -----AG---WMAGIP-----                                 | GHP | 42  |
| <i>Equus caballus</i> ADID         | 94 | -----AG---WMAGIP-----                                 | GHP | 104 |
| <i>Canis lupus familiaris</i> ADID | 46 | -----PG---WMAGIP-----                                 | GHP | 56  |
| <i>Felis catus</i> ADID            | 37 | -----TG---WMAGIP-----                                 | GHP | 47  |
| <i>Myotis lucifugus</i> ADID       | 46 | -----TG---WVAGIP-----                                 | GHP | 56  |
| <i>Dasyopus novemcinctus</i> ADID  | 38 | -----V-----IAGIP-----                                 | GLP | 46  |
| <i>Loxodonta africana</i> ADID     | 37 | -----AG---WMAGIP-----                                 | GHP | 47  |
| <i>Homo sapiens</i> ADIE           | 29 | -----PGHP-----                                        | GLP | 35  |
| <i>Pan troglodytes</i> ADIE        | 29 | -----PGHP-----                                        | GLP | 35  |
| <i>Pongo abelii</i> ADIE           | 29 | -----PGHP-----                                        | GLP | 35  |
| <i>Papio hamadryas</i> ADIE        | 29 | -----PGHP-----                                        | GLP | 35  |
| <i>Callithrix jacchus</i> ADIE     | 29 | -----PGHP-----                                        | GLP | 35  |
| <i>Otolemur garnettii</i> ADIE     | 29 | -----PGHP-----                                        | GLP | 35  |
| <i>Mus musculus</i> Adie           | 29 | -----PGQP-----                                        | GLP | 35  |
| <i>Rattus norvegicus</i> Adie      | 29 | -----PGQP-----                                        | GLP | 35  |
| <i>Homo sapiens</i> ADIF1          | 24 | -----RQHP-----                                        | GIP | 31  |
| <i>Homo sapiens</i> ADIF2          | 24 | -----RQHP-----                                        | GIP | 31  |
| <i>Pan troglodytes</i> ADIF1       | 24 | -----RQHP-----                                        | GIP | 31  |
| <i>Pongo abelii</i> ADIF1          | 24 | -----RQHP-----                                        | GIP | 31  |
| <i>Nomascus leucogenys</i> ADIF1   | 24 | -----RQHP-----                                        | GIP | 31  |
| <i>Macaca mulatta</i> ADIF1        | 24 | -----RQHP-----                                        | GIP | 31  |
| <i>Papio hamadryas</i> ADIF1       | 24 | -----RQHP-----                                        | GIP | 31  |

|                                     |     |                              |               |             |        |     |
|-------------------------------------|-----|------------------------------|---------------|-------------|--------|-----|
| <i>Microcebus murinus</i> ADIF1     | 24  | -----RQGHP-----              | GVP           | 31          |        |     |
| <i>Otolemur garnettii</i> ADIF1     | 24  | -----RQGPS-----              | GIP           | 31          |        |     |
| <i>Mus musculus</i> Adif1           | 53  | -----RQGHS-----              | GIP           | 60          |        |     |
| <i>Rattus norvegicus</i> Adif1      | 40  | -----RQGHS-----              | GIP           | 47          |        |     |
| <i>Cavia porcellus</i> ADIF1        | 24  | -----RQGHS-----              | GIP           | 31          |        |     |
| <i>Oryctolagus cuniculus</i> ADIF1  | 24  | -----RQGHP-----              | GIP           | 31          |        |     |
| <i>Ochotona princeps</i> ADIF1      | 24  | -----RQGHP-----              | GMP           | 31          |        |     |
| <i>Bos taurus</i> ADIF1             | 24  | -----KQGHP-----              | GIP           | 31          |        |     |
| <i>Equus caballus</i> ADIF1         | 24  | -----RQGHP-----              | GIP           | 31          |        |     |
| <i>Canis lupus familiaris</i> ADIF1 | 24  | -----RQGHP-----              | GIP           | 31          |        |     |
| <i>Felis catus</i> ADIF1            | 24  | -----RQGHP-----              | GVP           | 31          |        |     |
| <i>Dasyopus novemcinctus</i> ADIF1  | 25  | -----RQGHP-----              | GIP           | 32          |        |     |
| <i>Loxodonta africana</i> ADIF1     | 24  | -----RQGHS-----              | GIP           | 31          |        |     |
| <i>Homo sapiens</i> ADIG            | 89  | -----S----IPGLP-----         | GPP           | 97          |        |     |
| <i>Pan troglodytes</i> ADIG         | 89  | -----S----IPGLP-----         | GPP           | 97          |        |     |
| <i>Pongo abelii</i> ADIG            | 89  | -----S----IPGLP-----         | GPP           | 97          |        |     |
| <i>Callithrix jacchus</i> ADIG      | 75  | -----S----IPGLP-----         | GPP           | 83          |        |     |
| <i>Otolemur garnettii</i> ADIG      | 35  | -----S----IPGLP-----         | GPP           | 43          |        |     |
| <i>Mus musculus</i> Adig            | 77  | -----S----IPGLP-----         | GPP           | 85          |        |     |
| <i>Rattus norvegicus</i> Adig       | 78  | -----S----IPGLP-----         | GPP           | 86          |        |     |
| <i>Cavia porcellus</i> ADIG         | 35  | -----S----IPGLP-----         | GPP           | 43          |        |     |
| <i>Oryctolagus cuniculus</i> ADIG   | 35  | -----S----IPGLP-----         | GPP           | 43          |        |     |
| <i>Tursiops truncatus</i> ADIG      | 87  | -----S----IPGLP-----         | GPP           | 95          |        |     |
| <i>Bos taurus</i> ADIG              | 35  | -----S----IPGLP-----         | GPP           | 43          |        |     |
| <i>Equus caballus</i> ADIG          | 76  | -----S----IPGLP-----         | GPP           | 84          |        |     |
| <i>Canis lupus familiaris</i> ADIG  | 76  | -----S----IPGLP-----         | GPP           | 84          |        |     |
| <i>Myotis lucifugus</i> ADIG        | 35  | -----S----IPGLP-----         | GPP           | 43          |        |     |
| <i>Homo sapiens</i> ADIH            | 37  | -----S----LPGPQ-----         | GPP           | 45          |        |     |
| <i>Pan troglodytes</i> ADIH         | 37  | -----S----LPGPQ-----         | GPP           | 45          |        |     |
| <i>Pongo abelii</i> ADIH            | 37  | -----S----LPGPQ-----         | GPP           | 45          |        |     |
| <i>Nomascus leucogenys</i> ADIH     | 37  | -----S----LPGPQ-----         | GPP           | 45          |        |     |
| <i>Macaca mulatta</i> ADIH          | 37  | -----S----LPGPQ-----         | GPP           | 45          |        |     |
| <i>Papio hamadryas</i> ADIH         | 37  | -----S----LPGPQ-----         | GPP           | 45          |        |     |
| <i>Mus musculus</i> Adih            | 44  | -----S----LPGPQ-----         | GPP           | 52          |        |     |
| <i>Rattus norvegicus</i> Adih       | 81  | -----S----LPGPQ-----         | GPP           | 89          |        |     |
| <i>Dipodomys ordii</i> ADIH         | 37  | -----S----LPGPQ-----         | GPP           | 45          |        |     |
| <i>Cavia porcellus</i> ADIH         | 37  | -----S----LPGPQ-----         | GPP           | 45          |        |     |
| <i>Bos taurus</i> ADIH              | 54  | -----S----MPGPQ-----         | GPP           | 62          |        |     |
| <i>Equus caballus</i> ADIH          | 37  | -----S----LPGPQ-----         | GPP           | 45          |        |     |
| <i>Canis lupus familiaris</i> ADIH  | 37  | -----S----LPGPQ-----         | GPP           | 45          |        |     |
| <i>Pteropus vampyrus</i> ADIH       | 37  | -----S----LPGPQ-----         | GPP           | 45          |        |     |
| <i>Loxodonta africana</i> ADIH      | 37  | -----S----MPGPQ-----         | GPP           | 45          |        |     |
| <i>Homo sapiens</i> ADII            | 52  | PGPSTAA-LEVMQDLSANPPP-PFIQGP | GDPGRP        | 90          |        |     |
| <i>Pongo abelii</i> ADII            | 52  | PGPSTAA-LEVMQDLSANPPP-PFIQGP | GDPGRP        | 90          |        |     |
| <i>Macaca mulatta</i> ADII          | 52  | PGPSTAA-LEVMQDLSANPPP-PFIQGP | GDPGRP        | 90          |        |     |
| <i>Mus musculus</i> Adii            | 52  | PGPSTAA-LEVMQDLSANPPP-PFIQGP | GDPGRP        | 90          |        |     |
| <i>Rattus norvegicus</i> Adii       | 52  | PGPSTAA-LEVMQDLSANPPP-PFIQGP | GDPGRP        | 90          |        |     |
| <i>Bos taurus</i> ADII              | 52  | PGPSTAA-LEVMQDLSINPPP-PFIQGP | GDPGRP        | 90          |        |     |
| <i>Canis lupus familiaris</i> ADII  | 52  | PGPSTAA-LEVMQDLSANPPP-PFIQGP | GDPGRP        | 90          |        |     |
| <i>Dasyopus novemcinctus</i> ADII   | 52  | PGPSTAA-LEVMQDLSANPPP-PFIQGP | GDPGRP        | 90          |        |     |
| <i>Homo sapiens</i> ADIJ            | 41  | --PSTAATPDRGLMQS-L--P-TFIQGP | GEAGRP        | 75          |        |     |
| <i>Pan troglodytes</i> ADIJ         | 41  | --PSTAATPDRGLMQS-L--P-TFIQGP | GEAGRP        | 75          |        |     |
| <i>Papio hamadryas</i> ADIJ         | 41  | --PSTAATPDRGLMQS-L--P-TFIQGP | GEAGRP        | 75          |        |     |
| <i>Mus musculus</i> Adij            | 41  | --PSTAATPDRGLMQS-L--P-TFIQGP | GEAGRP        | 75          |        |     |
| <i>Rattus norvegicus</i> Adij       | 41  | --PSTAATPDRGLMQS-L--P-TFIQGP | GEAGRP        | 75          |        |     |
| <i>Oryctolagus cuniculus</i> ADIJ   | 41  | --PSTAATPDRGLMQS-L--P-TFIQGP | GEAGRP        | 75          |        |     |
| <i>Bos taurus</i> ADIJ              | 41  | --PSTAATPDRGLMQS-L--P-TFIQGP | GEAGRP        | 75          |        |     |
| <i>Canis lupus familiaris</i> ADIJ  | 41  | --PSTAATPDRGLMQS-L--P-TFIQGP | GEAGRP        | 75          |        |     |
| <i>Loxodonta africana</i> ADIJ      | 41  | --PSTAATPDRGLMQS-L--P-TFIQGP | GEAGRP        | 75          |        |     |
| <i>Homo sapiens</i> ADIK            | 36  | -----GPRGPGPDGAPASVPPFP      | GPAKGEV       | 69          |        |     |
| <i>Pan troglodytes</i> ADIK         | 36  | -----GPRGPGPDGAPASVPPFP      | GPAKGEV       | 69          |        |     |
| <i>Gorilla gorilla</i> ADIK         | 36  | -----GPRGPGPDGAPASVPPFP      | GPAKGEV       | 69          |        |     |
| <i>Papio hamadryas</i> ADIK         | 36  | -----GPRGPGPDGAPASVPPFP      | GPAKGEV       | 69          |        |     |
| <i>Callithrix jacchus</i> ADIK      | 36  | -----GPRGPGPDGAPASVPPFP      | GPAKGEV       | 69          |        |     |
| <i>Rattus norvegicus</i> Adik       | 36  | -----ASRQGS                  | SDGAPSSVPPFP  | GPAKGEV     | 69     |     |
| <i>Cavia porcellus</i> ADIK         | 36  | -----GPRGPGPDGAPASVPPFP      | GPAKGEV       | 69          |        |     |
| <i>Equus caballus</i> ADIK          | 36  | -----GPRGPGTDGAPASVPPYP      | PGTKGEM       | GRRGKAGLR   | 69     |     |
| <i>Canis lupus familiaris</i> ADIK  | 36  | -----GPRGPGPDGAPASVPPFP      | GPAKGEV       | GRRGKAGLR   | 69     |     |
| <i>Dasyopus novemcinctus</i> ADIK   | 36  | -----GPRGPDPEGAPASVPPFP      | GPAKGET       | GRRGKAGLR   | 69     |     |
| <i>Loxodonta africana</i> ADIK      | 36  | -----GPRGPGPDGAPSSVPPFP      | GPAKGEV       | GRRGKAGLR   | 69     |     |
| <i>Mus musculus</i> Adil            | 48  | GG-----DALSEQS               | GAPPPSTLVQGPQ | -----GKPGRT | GKPGPP | 81  |
| <i>Rattus norvegicus</i> Adil       | 48  | GG-----DALSEQS               | GAPPPSTLVQGPQ | -----GKPGRT | GKPGPP | 81  |
| <i>Homo sapiens</i> ADIM            | 156 | -----GDY-----                | -----         | -----       | -----  | 158 |
| <i>Pan troglodytes</i> ADIM         | 156 | -----GDY-----                | -----         | -----       | -----  | 158 |

|                                    |     |                            |       |       |     |
|------------------------------------|-----|----------------------------|-------|-------|-----|
| <i>Pongo abelii</i> ADIM           | 112 | ----                       | GDY   | ----- | 114 |
| <i>Nomascus leucogenys</i> ADIM    | 156 | ----                       | GDY   | ----- | 158 |
| <i>Papio hamadryas</i> ADIM        | 156 | ----                       | GDY   | ----- | 158 |
| <i>Callithrix jacchus</i> ADIM     | 146 | ----                       | GDY   | ----- | 148 |
| <i>Mus musculus</i> Adim           | 45  | ----                       | GDY   | ----- | 47  |
| <i>Rattus norvegicus</i> Adim      | 119 | ----                       | GDY   | ----- | 121 |
| <i>Cavia porcellus</i> ADIM        | 112 | ----                       | GDY   | ----- | 114 |
| <i>Bos taurus</i> ADIM             | 45  | ----                       | GDY   | ----- | 47  |
| <i>Equus caballus</i> ADIM         | 45  | ----                       | GDY   | ----- | 47  |
| <i>Canis lupus familiaris</i> ADIM | 106 | ----                       | GEY   | ----- | 108 |
| <i>Homo sapiens</i> ADIN           | -   | ----                       |       | ----- | -   |
| <i>Pan troglodytes</i> ADIN        | -   | ----                       |       | ----- | -   |
| <i>Pongo abelii</i> ADIN           | -   | ----                       |       | ----- | -   |
| <i>Nomascus leucogenys</i> ADIN    | -   | ----                       |       | ----- | -   |
| <i>Macaca mulatta</i> ADIN         | -   | ----                       |       | ----- | -   |
| <i>Callithrix jacchus</i> ADIN     | -   | ----                       |       | ----- | -   |
| <i>Mus musculus</i> Adin           | -   | ----                       |       | ----- | -   |
| <i>Cavia porcellus</i> ADIN        | -   | ----                       |       | ----- | -   |
| <i>Tursiops truncatus</i> ADIN     | -   | ----                       |       | ----- | -   |
| <i>Canis lupus familiaris</i> ADIN | -   | ----                       |       | ----- | -   |
| <i>Dasyopus novemcinctus</i> ADIN  | -   | ----                       |       | ----- | -   |
| <i>Loxodonta africana</i> ADIN     | -   | ----                       |       | ----- | -   |
| <i>Homo sapiens</i> ADIO           | 44  | DRDLWRGDLWRGLPRVRPTIDIEILK | ----  | ----- | 69  |
| <i>Pan troglodytes</i> ADIO        | 44  | DRDLWRGDLWRGLPRVRPTIDIEILK | ----  | ----- | 69  |
| <i>Macaca mulatta</i> ADIO         | 44  | D-----GDPWRSLPRVRPTIDIEILK | ----  | ----- | 64  |
| <i>Bos taurus</i> ADIO             | 48  | D-----GDAWAGLPRLRPTIDISILK | ----  | ----- | 68  |
| <i>Myotis lucifugus</i> ADIO       | 48  | E-----GEKWWQLPHVRPTIDISILK | ----  | ----- | 68  |
| <i>Homo sapiens</i> ADIP           | 188 | -----PQINITILK             | ----- | ----- | 196 |
| <i>Otolemur garnettii</i> ADIP     | 90  | -----PQINITILK             | ----- | ----- | 98  |
| <i>Mus musculus</i> Adip           | 90  | -----PQINITILK             | ----- | ----- | 98  |
| <i>Cavia porcellus</i> ADIP        | 90  | -----PQINITILK             | ----- | ----- | 98  |
| <i>Bos taurus</i> ADIP             | 113 | -----PQINITILK             | ----- | ----- | 121 |
| <i>Equus caballus</i> ADIP         | 88  | -----PQINITILK             | ----- | ----- | 96  |
| <i>Loxodonta africana</i> ADIP     | 142 | -----PQINITILK             | ----- | ----- | 150 |
| <i>Homo sapiens</i> ADIQ           | 73  | SASS-SGRPHA-LPEIRPYINITILK | ----- | ----- | 96  |
| <i>Pan troglodytes</i> ADIQ        | 73  | SASS-SGRPHA-LPEIRPYINITILK | ----- | ----- | 96  |
| <i>Pongo abelii</i> ADIQ           | 73  | SASS-SGPPYA-LPEIRPYINITILK | ----- | ----- | 96  |
| <i>Nomascus leucogenys</i> ADIQ    | 73  | SASS-SGPPHA-LPEIRPYINITILK | ----- | ----- | 96  |
| <i>Macaca mulatta</i> ADIQ         | 73  | SASS-SGLPHA-LPEIRPYINITILK | ----- | ----- | 96  |
| <i>Mus musculus</i> Adiq           | 61  | QAP---VSPYV-LPEVRPYINITILK | ----- | ----- | 82  |
| <i>Rattus norvegicus</i> Adiq      | 61  | NA---VPPYV-LPEVRPYINITILK  | ----- | ----- | 81  |
| <i>Homo sapiens</i> ADIR           | -   | ----                       |       | ----- | -   |
| <i>Pan troglodytes</i> ADIR        | -   | ----                       |       | ----- | -   |
| <i>Pongo abelii</i> ADIR           | -   | ----                       |       | ----- | -   |
| <i>Nomascus leucogenys</i> ADIR    | -   | ----                       |       | ----- | -   |
| <i>Macaca mulatta</i> ADIR         | -   | ----                       |       | ----- | -   |
| <i>Papio hamadryas</i> ADIR        | -   | ----                       |       | ----- | -   |
| <i>Callithrix jacchus</i> ADIR     | -   | ----                       |       | ----- | -   |
| <i>Tarsius syrichta</i> ADIR       | -   | ----                       |       | ----- | -   |
| <i>Otolemur garnettii</i> ADIR     | -   | ----                       |       | ----- | -   |
| <i>Tupaia belangeri</i> ADIR       | -   | ----                       |       | ----- | -   |
| <i>Mus musculus</i> Adir           | -   | ----                       |       | ----- | -   |
| <i>Rattus norvegicus</i> Adir      | -   | ----                       |       | ----- | -   |
| <i>Cavia porcellus</i> ADIR        | -   | ----                       |       | ----- | -   |
| <i>Oryctolagus cuniculus</i> ADIR  | -   | ----                       |       | ----- | -   |
| <i>Tursiops truncatus</i> ADIR     | -   | ----                       |       | ----- | -   |
| <i>Bos taurus</i> ADIR             | -   | ----                       |       | ----- | -   |
| <i>Equus caballus</i> ADIR         | -   | ----                       |       | ----- | -   |
| <i>Canis lupus familiaris</i> ADIR | -   | ----                       |       | ----- | -   |
| <i>Myotis lucifugus</i> ADIR       | -   | ----                       |       | ----- | -   |
| <i>Pteropus vampyrus</i> ADIR      | -   | ----                       |       | ----- | -   |
| <i>Erinaceus europaeus</i> ADIR    | -   | ----                       |       | ----- | -   |
| <i>Dasyopus novemcinctus</i> ADIR  | -   | ----                       |       | ----- | -   |
| <i>Choloepus hoffmanni</i> ADIR    | -   | ----                       |       | ----- | -   |
| <i>Loxodonta africana</i> ADIR     | -   | ----                       |       | ----- | -   |

|                                    | 45  | GTP    | ----- | CPD   | CP  | -----  | GTP  | GIK   | GEK    | ----- | G     | 63     |     |
|------------------------------------|-----|--------|-------|-------|-----|--------|------|-------|--------|-------|-------|--------|-----|
|                                    |     |        | 310   |       | 320 |        |      | 330   |        | 340   | 350   | 360    |     |
| <i>Homo sapiens ADIA</i>           | 45  | GTP    | ----- | CPD   | CP  | -----  | GTP  | GIK   | GEK    | ----- | G     | 63     |     |
| <i>Homo sapiens ADIA</i>           | 45  | GTP    | ----- | CPD   | CP  | -----  | GTP  | GIK   | GEK    | ----- | G     | 63     |     |
| <i>Papio hamadryas ADIA</i>        | 45  | GTP    | ----- | GSD   | GQP | -----  | GTP  | GIK   | GEK    | ----- | G     | 63     |     |
| <i>Mus musculus Adia</i>           | 72  | GVP    | ----- | GSD   | GQP | -----  | GTP  | GIK   | GEK    | ----- | G     | 90     |     |
| <i>Rattus norvegicus Adia</i>      | 43  | GVP    | ----- | GSD   | GKP | -----  | GTP  | GIK   | GEK    | ----- | G     | 61     |     |
| <i>Cavia porcellus ADIA</i>        | 43  | GVP    | ----- | GSD   | GQP | -----  | GTP  | GK    | GEK    | ----- | G     | 61     |     |
| <i>Ochotona princeps ADIA</i>      | 43  | GLP    | ----- | GSD   | GNP | -----  | GTP  | GVK   | GEK    | ----- | G     | 61     |     |
| <i>Bos taurus ADIA</i>             | 39  | GKP    | ----- | GSD   | GKP | -----  | GTP  | GK    | GEK    | ----- | G     | 57     |     |
| <i>Equus caballus ADIA</i>         | 44  | GSP    | ----- | GTD   | GKP | -----  | GTP  | GK    | GEK    | ----- | G     | 62     |     |
| <i>Canis lupus familiaris ADIA</i> | 42  | GAP    | ----- | GTD   | GTP | -----  | GTP  | GK    | GEK    | ----- | G     | 60     |     |
| <i>Felis catus ADIA</i>            | 46  | GAP    | ----- | GSP   | GTP | -----  | GTP  | GIK   | GEK    | ----- | G     | 64     |     |
| <i>Myotis lucifugus ADIA</i>       | 43  | GIP    | ----- | GSD   | GTP | -----  | GTP  | GVK   | GAK    | ----- | G     | 61     |     |
| <i>Dasytus novemcinctus ADIA</i>   | 40  | GRP    | ----- | GSD   | GQP | -----  | GTP  | GIK   | GAK    | ----- | G     | 58     |     |
| <i>Loxodonta africana ADIA</i>     | 43  | GPP    | ----- | GTN   | GQP | -----  | GTP  | GIK   | GEK    | ----- | G     | 61     |     |
| <i>Homo sapiens ADIB</i>           | 40  | GLP    | ----- | GAP   | GK  | DGYDGL | PLG  | PKGEP | -----  | G     | 61    |        |     |
| <i>Pan troglodytes ADIB</i>        | 40  | GLP    | ----- | GAP   | GK  | DGYDGL | PLG  | PKGEP | -----  | G     | 61    |        |     |
| <i>Pongo abelii ADIB</i>           | 40  | GLP    | ----- | GAP   | GK  | DGYDGL | PLG  | PKGEP | -----  | G     | 61    |        |     |
| <i>Nomascus leucogenys ADIB</i>    | 41  | GLP    | ----- | GAP   | GK  | DGYDGL | PLG  | PKGEP | -----  | G     | 62    |        |     |
| <i>Callithrix jacchus ADIB</i>     | 39  | GLP    | ----- | GAP   | GK  | DGHDGL | PLG  | PKGEP | -----  | G     | 60    |        |     |
| <i>Otolemur garnettii ADIB</i>     | 38  | GLP    | ----- | GAP   | GK  | DGHDGL | PLG  | PKGEP | -----  | G     | 59    |        |     |
| <i>Mus musculus Adib</i>           | 71  | GMP    | ----- | GAP   | GK  | DGHDGL | Q    | PKGEP | -----  | G     | 92    |        |     |
| <i>Rattus norvegicus Adib</i>      | 63  | GLP    | ----- | GTP   | GK  | DGHDGL | Q    | PKGEP | -----  | G     | 84    |        |     |
| <i>Cavia porcellus ADIB</i>        | 87  | GLP    | ----- | GAP   | GK  | DGHDGL | R    | PKGEP | -----  | G     | 108   |        |     |
| <i>Oryctolagus cuniculus ADIB</i>  | 93  | GLP    | ----- | GTP   | GK  | DGHDGL | PLG  | PKGEP | -----  | G     | 114   |        |     |
| <i>Bos taurus ADIB</i>             | 38  | GLP    | ----- | GAP   | GK  | DGYDGL | PLG  | PKGEP | -----  | G     | 59    |        |     |
| <i>Equus caballus ADIB</i>         | 58  | GMP    | ----- | GTP   | GK  | DGHDGL | PLG  | PKGEP | -----  | G     | 79    |        |     |
| <i>Canis lupus familiaris ADIB</i> | 40  | GLP    | ----- | GAP   | GK  | DGHDGL | PLG  | PKGEP | -----  | G     | 61    |        |     |
| <i>Myotis lucifugus ADIB</i>       | 40  | GMP    | ----- | GAP   | GK  | DGHDGL | Q    | PKGEP | -----  | G     | 61    |        |     |
| <i>Loxodonta africana ADIB</i>     | 38  | GLP    | ----- | GAP   | GK  | DGHDGL | PLG  | PKGEP | -----  | G     | 59    |        |     |
| <i>Homo sapiens ADIC</i>           | 37  | GRP    | ----- | GRR   | GRP | -----  | GLK  | G     | EQGEP  | ----- | G     | 55     |     |
| <i>Macaca mulatta ADIC</i>         | 37  | GRP    | ----- | GRP   | GRP | -----  | GLK  | G     | GERGEP | ----- | G     | 55     |     |
| <i>Papio hamadryas ADIC</i>        | 37  | GRP    | ----- | GRP   | GRP | -----  | GLK  | G     | GERGEP | ----- | G     | 55     |     |
| <i>Callithrix jacchus ADIC</i>     | 37  | GRP    | ----- | GRP   | GRP | -----  | GLK  | G     | EQGEP  | ----- | G     | 55     |     |
| <i>Mus musculus Adic</i>           | 37  | GNP    | ----- | GRP   | GRP | -----  | GLK  | G     | GERGEP | ----- | G     | 55     |     |
| <i>Rattus norvegicus Adic</i>      | 49  | GIP    | ----- | GRP   | GRP | -----  | GLK  | G     | GERGEP | ----- | G     | 67     |     |
| <i>Cavia porcellus ADIC</i>        | 36  | GKP    | ----- | GRP   | GRP | -----  | GLK  | G     | GERGEP | ----- | G     | 54     |     |
| <i>Oryctolagus cuniculus ADIC</i>  | 78  | GKP    | ----- | GRP   | GRP | -----  | GLK  | G     | ERGAP  | ----- | G     | 96     |     |
| <i>Equus caballus ADIC</i>         | 70  | GIP    | ----- | GRP   | GRP | -----  | GPK  | G     | GERGEP | ----- | G     | 88     |     |
| <i>Canis lupus familiaris ADIC</i> | 56  | GTP    | ----- | GRP   | GRP | -----  | GLK  | G     | EQGEP  | ----- | G     | 74     |     |
| <i>Myotis lucifugus ADIC</i>       | 37  | GKP    | ----- | GRP   | GRP | -----  | GLK  | G     | EQGEP  | ----- | G     | 55     |     |
| <i>Loxodonta africana ADIC</i>     | 52  | GNP    | ----- | GRS   | GRP | -----  | GLK  | G     | GERGEP | ----- | G     | 70     |     |
| <i>Homo sapiens ADID</i>           | 79  | GHNGAP | ----- | GRD   | GRD | GT     | PGEK | KEK   | GDP    | ----- | G     | 103    |     |
| <i>Pan troglodytes ADID</i>        | 79  | GHNGAP | ----- | GRD   | GRD | GT     | PGEK | KEK   | GDP    | ----- | G     | 103    |     |
| <i>Pongo abelii ADID</i>           | 48  | GHNGAP | ----- | GRD   | GRD | GI     | PGEK | KEK   | GDP    | ----- | G     | 72     |     |
| <i>Nomascus leucogenys ADID</i>    | 78  | GHNGAP | ----- | GRD   | GRD | GI     | S    | EK    | KEK    | GDP   | ----- | G      | 102 |
| <i>Macaca mulatta ADID</i>         | 77  | GHNGVP | ----- | GRD   | GRD | GT     | A    | EK    | KEK    | GDP   | ----- | G      | 101 |
| <i>Otolemur garnettii ADID</i>     | 48  | GHNGTP | ----- | GRD   | GRD | GT     | PGEK | KEK   | GDP    | ----- | G     | 72     |     |
| <i>Mus musculus Adid</i>           | 62  | GHNGTP | ----- | GRD   | GRD | GT     | PGEK | KEK   | GDA    | ----- | G     | 86     |     |
| <i>Rattus norvegicus Adid</i>      | 48  | GHNGIP | ----- | GRD   | GRD | GT     | PGEK | KEK   | GDA    | ----- | G     | 72     |     |
| <i>Cavia porcellus ADID</i>        | 90  | GHNGIP | ----- | GRD   | GRD | GA     | P    | EK    | KEK    | GDA   | ----- | G      | 114 |
| <i>Oryctolagus cuniculus ADID</i>  | 58  | GHNGTP | ----- | GRD   | GRD | GT     | PGEK | KEK   | GDA    | ----- | G     | 82     |     |
| <i>Bos taurus ADID</i>             | 43  | GHNGTP | ----- | GRD   | GRD | GT     | PGEK | KEK   | GDP    | ----- | G     | 67     |     |
| <i>Equus caballus ADID</i>         | 105 | GHNGTP | ----- | GRD   | GRD | GT     | PGEK | KEK   | GDP    | ----- | G     | 129    |     |
| <i>Canis lupus familiaris ADID</i> | 57  | GHNGTP | ----- | GRD   | GRD | GT     | PGEK | KEK   | GDP    | ----- | G     | 81     |     |
| <i>Felis catus ADID</i>            | 48  | GHNGTP | ----- | GRD   | GRD | GT     | PGEK | KEK   | GDP    | ----- | G     | 72     |     |
| <i>Myotis lucifugus ADID</i>       | 57  | GHNGTP | ----- | GRD   | GRD | GT     | PGEK | KEK   | GDA    | ----- | G     | 81     |     |
| <i>Dasytus novemcinctus ADID</i>   | 47  | GHNGIP | ----- | GRD   | GRD | GV     | P    | QK    | KEK    | GD    | ----- | G      | 71  |
| <i>Loxodonta africana ADID</i>     | 48  | GHNGTP | ----- | GRD   | GRD | GT     | PGEK | KEK   | GDP    | ----- | G     | 72     |     |
| <i>Homo sapiens ADIE</i>           | 36  | GTP    | GHHS  | QGLP  | GRD | GRD    | GRD  | GAP   | GAP    | G     | EK    | GEGGRP | 72  |
| <i>Pan troglodytes ADIE</i>        | 36  | GTP    | GHHS  | QGLP  | GRD | GRD    | GRD  | GAP   | GAP    | G     | EK    | GEGGRP | 72  |
| <i>Pongo abelii ADIE</i>           | 36  | GTP    | GHHS  | QGLP  | GRD | GRD    | GRD  | GAP   | GAP    | G     | EK    | GEGGRP | 72  |
| <i>Papio hamadryas ADIE</i>        | 36  | GTP    | GHHS  | QGLP  | GRD | GRD    | GRD  | GAP   | GAP    | G     | EK    | GEGGRP | 72  |
| <i>Callithrix jacchus ADIE</i>     | 36  | GTP    | GHHS  | QGLP  | GRD | GRD    | GRD  | GAP   | GAP    | G     | EK    | GEGGRP | 72  |
| <i>Otolemur garnettii ADIE</i>     | 36  | GTP    | GHHS  | QGLP  | GRD | GRD    | GRD  | GAP   | GAP    | G     | EK    | GEGQP  | 72  |
| <i>Mus musculus Adie</i>           | 36  | GTP    | GHHS  | QGLP  | GRD | GRD    | GRD  | GAP   | GAP    | G     | EK    | GEGGRP | 72  |
| <i>Rattus norvegicus Adie</i>      | 36  | GTP    | GHHS  | QGLP  | GRD | GRD    | GRD  | GAP   | GAP    | G     | EK    | GEGGRP | 72  |
| <i>Homo sapiens ADIF1</i>          | 32  | GNP    | GHN   | ----- | GLP | GRD    | GRD  | GA    | K      | D     | K     | GDA    | 79  |
| <i>Homo sapiens ADIF2</i>          | 32  | GNP    | GHN   | ----- | GLP | GRD    | GRD  | GA    | K      | D     | K     | GDA    | 79  |
| <i>Pan troglodytes ADIF1</i>       | 32  | GNP    | GHN   | ----- | GLP | GRD    | GRD  | GA    | K      | D     | K     | GDA    | 79  |
| <i>Pongo abelii ADIF1</i>          | 32  | GNP    | GHN   | ----- | GLP | GRD    | GRD  | GA    | K      | D     | K     | GDA    | 79  |
| <i>Nomascus leucogenys ADIF1</i>   | 32  | GNP    | GHN   | ----- | GLP | GRD    | GRD  | GA    | K      | D     | K     | GDA    | 79  |
| <i>Macaca mulatta ADIF1</i>        | 32  | GNP    | GHN   | ----- | GLP | GRD    | GRD  | GA    | K      | D     | K     | GDA    | 79  |
| <i>Papio hamadryas ADIF1</i>       | 32  | GNP    | GHN   | ----- | GLP | GRD    | GRD  | GA    | K      | D     | K     | GDA    | 79  |



|                                     |     |                                                            |     |
|-------------------------------------|-----|------------------------------------------------------------|-----|
| <i>Microcebus murinus</i> ADIF1     | 32  | GNPGHN-----GLPGRDGRDGAKGDKGDA---GEPGHPGSPGKDGASGDKGERGAD   | 79  |
| <i>Otolemur garnettii</i> ADIF1     | 32  | GNPGHN-----GLPGRDGRDGAKGDKGDA---GEPGRPGSPGKDGMRGEKQORGAD   | 79  |
| <i>Mus musculus</i> Adif1           | 61  | GNPGHN-----GLPGRDGRDGAKGDKGDA---GEPGHPGGPKDGIIRGEKGEPEGAD  | 108 |
| <i>Rattus norvegicus</i> Adif1      | 48  | GTPGHN-----GLPGRDGRDGAKGDKGDT---GEPGHPGGPKDGIIRGEKGEPEGAD  | 95  |
| <i>Cavia porcellus</i> ADIF1        | 32  | GNPGHN-----GLPGRDGRDGAKGDKGDA---GEPGRPGSPGKDGMSGEKGERGAD   | 79  |
| <i>Oryctolagus cuniculus</i> ADIF1  | 32  | GS PGHN-----GLPGRDGRDGAKGDKGDA---GEPGHPGSPGKEGRSSEKGDORGAD | 79  |
| <i>Ochotona princeps</i> ADIF1      | 32  | GSPGHN-----GLPGRDGRDGAKGDKGDT---GEPGHPGDGKDGSRSEKGERGAD    | 79  |
| <i>Bos taurus</i> ADIF1             | 32  | GNPGHN-----GLPGRDGRDGAKGDKGDA---GEPGHPGGPKDGMTGKKGEPEGAD   | 79  |
| <i>Equus caballus</i> ADIF1         | 32  | GNPGHN-----GLPGRDGRDGAKGDKGDA---GEPGRPGSPGKDGVNSEKGERGAD   | 79  |
| <i>Canis lupus familiaris</i> ADIF1 | 32  | GNPGHN-----GLPGRDGRDGAKGDKGEA---GEPGHPGGPKDGMNGEKGGERGAD   | 79  |
| <i>Felis catus</i> ADIF1            | 32  | GNPGHN-----GLPGRDGRDGAKGDKGEA---GEPGHPGGPKDGMNGEKGGERGAD   | 79  |
| <i>Dasyopus novemcinctus</i> ADIF1  | 33  | GNPGHN-----GLPGRDGRDGAKGDKGDA---GEPGLPGGPKDGMKGEKGERGAD    | 80  |
| <i>Loxodonta africana</i> ADIF1     | 32  | GNPGHN-----GLPGRDGRDGAKGDKGDA---GEPGLPGGPKDGMNGEKGGERGAD   | 79  |
| <i>Homo sapiens</i> ADIG            | 98  | GPPGANGSPGPHGRIGLPGRDGRDGRKGEKGEKGTAG-----                 | 134 |
| <i>Pan troglodytes</i> ADIG         | 98  | GPPGANGSPGPHGRIGLPGRDGRDGRKGEKGEKGTAG-----                 | 134 |
| <i>Pongo abelii</i> ADIG            | 98  | GPPGANGSPGPHGRIGLPGRDGRDGRKGEKGEKGTAG-----                 | 134 |
| <i>Callithrix jacchus</i> ADIG      | 84  | GPPGANGSPGPHGRIGLPGRDGRDGRKGEKGEKGTAG-----                 | 120 |
| <i>Otolemur garnettii</i> ADIG      | 44  | GPPGATGSPGPHGRIGLPGRDGRDGRKGEKGEKGAAG-----                 | 80  |
| <i>Mus musculus</i> Adig            | 86  | GPPGANGSPGPHGRIGLPGRDGRDGRKGEKGEKGTAG-----                 | 122 |
| <i>Rattus norvegicus</i> Adig       | 87  | GPPGANGSPGPHGRIGLPGRDGRDGRKGEKGEKGTAG-----                 | 123 |
| <i>Cavia porcellus</i> ADIG         | 44  | GPPGANGSPGHHGRIGLPGRDGRDGRKGEKGEKGTAG-----                 | 80  |
| <i>Oryctolagus cuniculus</i> ADIG   | 44  | GPPGANGSPGHHGRIGLPGRDGRDGRKGEKGEKGSAG-----                 | 80  |
| <i>Tursiops truncatus</i> ADIG      | 96  | GPPGANGSPGPHGRIGLPGRDGRDGRKGEKGEKGAAG-----                 | 132 |
| <i>Bos taurus</i> ADIG              | 44  | GPPGANGSPGPHGRIGLPGRDGRDGRKGEKGEKGAAG-----                 | 80  |
| <i>Equus caballus</i> ADIG          | 85  | GPPGANGSPGPHGRIGLPGRDGRDGRKGEKGEKGAAG-----                 | 121 |
| <i>Canis lupus familiaris</i> ADIG  | 85  | GPPGANGSPGPHGRIGLPGRDGRDGRKGEKGEKGAAG-----                 | 121 |
| <i>Myotis lucifugus</i> ADIG        | 44  | GPPGASGSPGPHGRIGLPGRDGRDGRKGEKGEKGAAG-----                 | 80  |
| <i>Homo sapiens</i> ADIH            | 46  | GPPGAPGSPGMMGRMGFPKDGQDGDGDRGDSGEEG-----                   | 82  |
| <i>Pan troglodytes</i> ADIH         | 46  | GPPGAPGSPGMMGRMGFPKDGQDGDGDRGDSGEEG-----                   | 82  |
| <i>Pongo abelii</i> ADIH            | 46  | GPPGAPGSPGMMGRMGFPKDGQDGDGDRGDSGEEG-----                   | 82  |
| <i>Nomascus leucogenys</i> ADIH     | 46  | GPPGAPGSPGIMGRMGFPKDGQDGDGDRGDSGEEG-----                   | 82  |
| <i>Macaca mulatta</i> ADIH          | 46  | GPPGAPGSPGMMGRMGFPKDGQDGDGDRGDSGEEG-----                   | 82  |
| <i>Papio hamadryas</i> ADIH         | 46  | GPPGAPGSPGMMGRMGFPKDGQDGDGDRGDSGEEG-----                   | 82  |
| <i>Mus musculus</i> Adih            | 53  | GPPGAPGSSGVVGRMGFPKDGQDGDGDRGDSGEEG-----                   | 89  |
| <i>Rattus norvegicus</i> Adih       | 90  | GPPGAPGSSGMVGRMGFPKDGQDGDGDRGDSGEEG-----                   | 126 |
| <i>Dipodomys ordii</i> ADIH         | 46  | GPPGVPGPGSTVGRMGFPKDGQDGDGDRGDSGEEG-----                   | 82  |
| <i>Cavia porcellus</i> ADIH         | 46  | GPPGAPGPGSTVGRMGFPKDGQDGDGDRGDNNEEG-----                   | 82  |
| <i>Bos taurus</i> ADIH              | 63  | GPPGAPGPGSMVGRMGFPGRDGDQDGDGDRGETGEEG-----                 | 99  |
| <i>Equus caballus</i> ADIH          | 46  | GPPGAPGPGSMVGRMGFPKDGQDGDGDRGDNNEEG-----                   | 82  |
| <i>Canis lupus familiaris</i> ADIH  | 46  | GPPGAPGPGSMVGRMGFPKDGQDGDGDRGDSGEEG-----                   | 82  |
| <i>Pteropus vampyrus</i> ADIH       | 46  | GPPGTPLSGMVGRMGFPKDGQDGDGDRGDRGEEG-----                    | 82  |
| <i>Loxodonta africana</i> ADIH      | 46  | GPPGAPGPGSMVGRMGFPKDGQDGDGDRGDNNEEG-----                   | 82  |
| <i>Homo sapiens</i> ADII            | 91  | GPPGEPGPPGPRGPPGEGKDSGRPGLP-----GLQ-----                   | 120 |
| <i>Pongo abelii</i> ADII            | 91  | GPPGEPGPPGPRGPPGEGKDSGRPGLP-----GLQ-----                   | 120 |
| <i>Macaca mulatta</i> ADII          | 91  | GPPGEPGPPGPRGPPGEGKDSGRPGLP-----GLQ-----                   | 120 |
| <i>Mus musculus</i> Adii            | 91  | GPPGEPGPPGPRGPPGEGKDSGRPGLP-----GLQ-----                   | 120 |
| <i>Rattus norvegicus</i> Adii       | 91  | GPPGEPGPPGPRGPPGEGKDSGRPGLP-----GLQ-----                   | 120 |
| <i>Bos taurus</i> ADII              | 91  | GPPGEPGPPGPRGPPGEGKDSGRPGLP-----GLQ-----                   | 120 |
| <i>Canis lupus familiaris</i> ADII  | 91  | GPPGEPGPPGPRGPPGEGKDSGRPGLP-----GLQ-----                   | 120 |
| <i>Dasyopus novemcinctus</i> ADII   | 91  | GPPGEPGPPGPRGPPGEGKDSGRPGLP-----GLQ-----                   | 120 |
| <i>Homo sapiens</i> ADIJ            | 76  | GPPGEPGPPGPMGPPGEGKEPGRQGLPGPPGAPGLN-----                  | 111 |
| <i>Pan troglodytes</i> ADIJ         | 76  | GPPGEPGPPGPMGPPGEGKEPGRQGLPGPPGAPGLN-----                  | 111 |
| <i>Papio hamadryas</i> ADIJ         | 76  | GPPGEPGPPGPMGPPGEGKEPGRQGLPGPPGAPGLN-----                  | 111 |
| <i>Mus musculus</i> Adij            | 76  | GPPGEPGPPGPMGPPGEGKEPGRQGLPGPPGAPGLN-----                  | 111 |
| <i>Rattus norvegicus</i> Adij       | 76  | GPPGEPGPPGPMGPPGEGKEPGRQGLPGPPGAPGLN-----                  | 111 |
| <i>Oryctolagus cuniculus</i> ADIJ   | 76  | GPPGEPGPPGPMGPPGEGKEPGRQGLPGPPGAPGLN-----                  | 111 |
| <i>Bos taurus</i> ADIJ              | 76  | GPPGEPGPPGPMGPPGEGKEPGRQGLPGPPGAPGLN-----                  | 111 |
| <i>Canis lupus familiaris</i> ADIJ  | 76  | GPPGEPGPPGPMGPPGEGKEPGRQGLPGPPGAPGLN-----                  | 111 |
| <i>Loxodonta africana</i> ADIJ      | 76  | GPPGEPGPPGPMGPPGEGKEPGRQGLPGPPGAPGLN-----                  | 111 |
| <i>Homo sapiens</i> ADIK            | 70  | GPP---GPPGPRGPP---GEPGRPGPPGPP---GPG-----                  | 96  |
| <i>Pan troglodytes</i> ADIK         | 70  | GPP---GPPGPRGPP---GEPGRPGPPGPP---GPG-----                  | 96  |
| <i>Gorilla gorilla</i> ADIK         | 70  | GPP---GPPGPRGPP---GEPGRPGPPGPP---GPG-----                  | 96  |
| <i>Papio hamadryas</i> ADIK         | 70  | GPP---GPPGPRGPP---GEPGRPGPPGPP---GPG-----                  | 96  |
| <i>Callithrix jacchus</i> ADIK      | 70  | GPP---GPPGPRGPP---GEPGRPGPPGPP---GPG-----                  | 96  |
| <i>Rattus norvegicus</i> Adik       | 70  | GPP---GPPGPRGPP---GEPGRPGPPGPP---GPG-----                  | 96  |
| <i>Cavia porcellus</i> ADIK         | 70  | GPP---GPPGPRGPP---GEPGRPGPPGPP---GPG-----                  | 96  |
| <i>Equus caballus</i> ADIK          | 70  | GPP---GPPGPRGPP---GEPGRPGPPGPP---GPG-----                  | 96  |
| <i>Canis lupus familiaris</i> ADIK  | 70  | GPP---GPPGPRGPP---GEPGRPGPPGPP---GPG-----                  | 96  |
| <i>Dasyopus novemcinctus</i> ADIK   | 70  | GPP---GPPGPRGPP---GEPGRPGPPGPP---GPG-----                  | 96  |
| <i>Loxodonta africana</i> ADIK      | 70  | GPP---GPPGPRGPP---GEPGRPGPPGPP---GPG-----                  | 96  |
| <i>Mus musculus</i> Adil            | 82  | GPPGDRGPPGVPVGGPEKEPGRKPGPPGLPGSGGSG-----                  | 117 |
| <i>Rattus norvegicus</i> Adil       | 82  | GPPGDRGPPGVPVGGPEKEPGRKPGPPGLPGSGGSG-----                  | 117 |
| <i>Homo sapiens</i> ADIM            | 159 | -----SFRGYQGPPGPPGPPGIP-----G-----                         | 177 |
| <i>Pan troglodytes</i> ADIM         | 159 | -----SFRGYQGPPGPPGPPGIP-----G-----                         | 177 |

|                                    |     |                                     |     |
|------------------------------------|-----|-------------------------------------|-----|
| <i>Pongo abelii</i> ADIM           | 115 | -----SFRGYQGGPPGPPGPPGIP-----G----- | 133 |
| <i>Nomascus leucogenys</i> ADIM    | 159 | -----SFRGYQGGPPGPPGPPGIP-----G----- | 177 |
| <i>Papio hamadryas</i> ADIM        | 159 | -----SFRGYQGGPPGPPGPPGIP-----G----- | 177 |
| <i>Callithrix jacchus</i> ADIM     | 149 | -----SFRGYQGGPPGPPGPPGIP-----G----- | 167 |
| <i>Mus musculus</i> Adim           | 48  | -----GFRGYQGGPPGPPGPPGIP-----G----- | 66  |
| <i>Rattus norvegicus</i> Adim      | 122 | -----GFRGYQGGPPGPPGPPGIP-----G----- | 140 |
| <i>Cavia porcellus</i> ADIM        | 115 | -----GFRGYQGGPPGPPGPPGIP-----G----- | 133 |
| <i>Bos taurus</i> ADIM             | 48  | -----SFRGYQGGPPGPPGPPGIP-----G----- | 66  |
| <i>Equus caballus</i> ADIM         | 48  | -----SFRGYQGGPPGPPGPPGIP-----G----- | 66  |
| <i>Canis lupus familiaris</i> ADIM | 109 | -----SFRGYQGGPPGPPGPPGIP-----G----- | 127 |
| <i>Homo sapiens</i> ADIN           | -   | -----                               | -   |
| <i>Pan troglodytes</i> ADIN        | -   | -----                               | -   |
| <i>Pongo abelii</i> ADIN           | -   | -----                               | -   |
| <i>Nomascus leucogenys</i> ADIN    | -   | -----                               | -   |
| <i>Macaca mulatta</i> ADIN         | -   | -----                               | -   |
| <i>Callithrix jacchus</i> ADIN     | -   | -----                               | -   |
| <i>Mus musculus</i> Adin           | -   | -----                               | -   |
| <i>Cavia porcellus</i> ADIN        | -   | -----                               | -   |
| <i>Tursiops truncatus</i> ADIN     | -   | -----                               | -   |
| <i>Canis lupus familiaris</i> ADIN | -   | -----                               | -   |
| <i>Dasyopus novemcinctus</i> ADIN  | -   | -----                               | -   |
| <i>Loxodonta africana</i> ADIN     | -   | -----                               | -   |
| <i>Homo sapiens</i> ADIO           | 70  | -----G-----                         | 70  |
| <i>Pan troglodytes</i> ADIO        | 70  | -----G-----                         | 70  |
| <i>Macaca mulatta</i> ADIO         | 65  | -----G-----                         | 65  |
| <i>Bos taurus</i> ADIO             | 69  | -----G-----                         | 69  |
| <i>Myotis lucifugus</i> ADIO       | 69  | -----G-----                         | 69  |
| <i>Homo sapiens</i> ADIP           | 197 | -----G-----                         | 197 |
| <i>Otolemur garnettii</i> ADIP     | 99  | -----G-----                         | 99  |
| <i>Mus musculus</i> Adip           | 99  | -----G-----                         | 99  |
| <i>Cavia porcellus</i> ADIP        | 99  | -----G-----                         | 99  |
| <i>Bos taurus</i> ADIP             | 122 | -----G-----                         | 122 |
| <i>Equus caballus</i> ADIP         | 97  | -----G-----                         | 97  |
| <i>Loxodonta africana</i> ADIP     | 151 | -----G-----                         | 151 |
| <i>Homo sapiens</i> ADIQ           | 97  | -----G-----                         | 97  |
| <i>Pan troglodytes</i> ADIQ        | 97  | -----G-----                         | 97  |
| <i>Pongo abelii</i> ADIQ           | 97  | -----G-----                         | 97  |
| <i>Nomascus leucogenys</i> ADIQ    | 97  | -----G-----                         | 97  |
| <i>Macaca mulatta</i> ADIQ         | 97  | -----G-----                         | 97  |
| <i>Mus musculus</i> Adiq           | 83  | -----G-----                         | 83  |
| <i>Rattus norvegicus</i> Adiq      | 82  | -----G-----                         | 82  |
| <i>Homo sapiens</i> ADIR           | -   | -----                               | -   |
| <i>Pan troglodytes</i> ADIR        | -   | -----                               | -   |
| <i>Pongo abelii</i> ADIR           | -   | -----                               | -   |
| <i>Nomascus leucogenys</i> ADIR    | -   | -----                               | -   |
| <i>Macaca mulatta</i> ADIR         | -   | -----                               | -   |
| <i>Papio hamadryas</i> ADIR        | -   | -----                               | -   |
| <i>Callithrix jacchus</i> ADIR     | -   | -----                               | -   |
| <i>Tarsius syrichta</i> ADIR       | -   | -----                               | -   |
| <i>Otolemur garnettii</i> ADIR     | -   | -----                               | -   |
| <i>Tupaia belangeri</i> ADIR       | -   | -----                               | -   |
| <i>Mus musculus</i> Adir           | -   | -----                               | -   |
| <i>Rattus norvegicus</i> Adir      | -   | -----                               | -   |
| <i>Cavia porcellus</i> ADIR        | -   | -----                               | -   |
| <i>Oryctolagus cuniculus</i> ADIR  | -   | -----                               | -   |
| <i>Tursiops truncatus</i> ADIR     | -   | -----                               | -   |
| <i>Bos taurus</i> ADIR             | -   | -----                               | -   |
| <i>Equus caballus</i> ADIR         | -   | -----                               | -   |
| <i>Canis lupus familiaris</i> ADIR | -   | -----                               | -   |
| <i>Myotis lucifugus</i> ADIR       | -   | -----                               | -   |
| <i>Pteropus vampyrus</i> ADIR      | -   | -----                               | -   |
| <i>Erinaceus europaeus</i> ADIR    | -   | -----                               | -   |
| <i>Dasyopus novemcinctus</i> ADIR  | -   | -----                               | -   |
| <i>Choloepus hoffmanni</i> ADIR    | -   | -----                               | -   |
| <i>Loxodonta africana</i> ADIR     | -   | -----                               | -   |

|                                    | 370 | 380            | 390                         | 400           | 410     | 420 |
|------------------------------------|-----|----------------|-----------------------------|---------------|---------|-----|
| <i>Homo sapiens</i> ADIA           |     |                |                             |               |         |     |
| <i>Homo sapiens</i> ADIA           |     |                |                             |               |         |     |
| <i>Papio hamadryas</i> ADIA        |     |                |                             |               |         |     |
| <i>Mus musculus</i> Adia           |     |                |                             |               |         |     |
| <i>Rattus norvegicus</i> Adia      |     |                |                             |               |         |     |
| <i>Cavia porcellus</i> ADIA        |     |                |                             |               |         |     |
| <i>Ochotona princeps</i> ADIA      |     |                |                             |               |         |     |
| <i>Bos taurus</i> ADIA             |     |                |                             |               |         |     |
| <i>Equus caballus</i> ADIA         |     |                |                             |               |         |     |
| <i>Canis lupus familiaris</i> ADIA |     |                |                             |               |         |     |
| <i>Felis catus</i> ADIA            |     |                |                             |               |         |     |
| <i>Myotis lucifugus</i> ADIA       |     |                |                             |               |         |     |
| <i>Dasyopus novemcinctus</i> ADIA  |     |                |                             |               |         |     |
| <i>Loxodonta africana</i> ADIA     |     |                |                             |               |         |     |
| <i>Homo sapiens</i> ADIB           |     |                |                             |               |         |     |
| <i>Pan troglodytes</i> ADIB        |     |                |                             |               |         |     |
| <i>Pongo abelii</i> ADIB           |     |                |                             |               |         |     |
| <i>Nomascus leucogenys</i> ADIB    |     |                |                             |               |         |     |
| <i>Callithrix jacchus</i> ADIB     |     |                |                             |               |         |     |
| <i>Otolemur garnettii</i> ADIB     |     |                |                             |               |         |     |
| <i>Mus musculus</i> Adib           |     |                |                             |               |         |     |
| <i>Rattus norvegicus</i> Adib      |     |                |                             |               |         |     |
| <i>Cavia porcellus</i> ADIB        |     |                |                             |               |         |     |
| <i>Oryctolagus cuniculus</i> ADIB  |     |                |                             |               |         |     |
| <i>Bos taurus</i> ADIB             |     |                |                             |               |         |     |
| <i>Equus caballus</i> ADIB         |     |                |                             |               |         |     |
| <i>Canis lupus familiaris</i> ADIB |     |                |                             |               |         |     |
| <i>Myotis lucifugus</i> ADIB       |     |                |                             |               |         |     |
| <i>Loxodonta africana</i> ADIB     |     |                |                             |               |         |     |
| <i>Homo sapiens</i> ADIC           |     |                |                             |               |         |     |
| <i>Macaca mulatta</i> ADIC         |     |                |                             |               |         |     |
| <i>Papio hamadryas</i> ADIC        |     |                |                             |               |         |     |
| <i>Callithrix jacchus</i> ADIC     |     |                |                             |               |         |     |
| <i>Mus musculus</i> Adic           |     |                |                             |               |         |     |
| <i>Rattus norvegicus</i> Adic      |     |                |                             |               |         |     |
| <i>Cavia porcellus</i> ADIC        |     |                |                             |               |         |     |
| <i>Oryctolagus cuniculus</i> ADIC  |     |                |                             |               |         |     |
| <i>Equus caballus</i> ADIC         |     |                |                             |               |         |     |
| <i>Canis lupus familiaris</i> ADIC |     |                |                             |               |         |     |
| <i>Myotis lucifugus</i> ADIC       |     |                |                             |               |         |     |
| <i>Loxodonta africana</i> ADIC     |     |                |                             |               |         |     |
| <i>Homo sapiens</i> ADID           |     |                |                             |               |         |     |
| <i>Pan troglodytes</i> ADID        |     |                |                             |               |         |     |
| <i>Pongo abelii</i> ADID           |     |                |                             |               |         |     |
| <i>Nomascus leucogenys</i> ADID    |     |                |                             |               |         |     |
| <i>Macaca mulatta</i> ADID         |     |                |                             |               |         |     |
| <i>Otolemur garnettii</i> ADID     |     |                |                             |               |         |     |
| <i>Mus musculus</i> Adid           |     |                |                             |               |         |     |
| <i>Rattus norvegicus</i> Adid      |     |                |                             |               |         |     |
| <i>Cavia porcellus</i> ADID        |     |                |                             |               |         |     |
| <i>Oryctolagus cuniculus</i> ADID  |     |                |                             |               |         |     |
| <i>Bos taurus</i> ADID             |     |                |                             |               |         |     |
| <i>Equus caballus</i> ADID         |     |                |                             |               |         |     |
| <i>Canis lupus familiaris</i> ADID |     |                |                             |               |         |     |
| <i>Felis catus</i> ADID            |     |                |                             |               |         |     |
| <i>Myotis lucifugus</i> ADID       |     |                |                             |               |         |     |
| <i>Dasyopus novemcinctus</i> ADID  |     |                |                             |               |         |     |
| <i>Loxodonta africana</i> ADID     |     |                |                             |               |         |     |
| <i>Homo sapiens</i> ADIE           |     |                |                             |               |         |     |
| <i>Pan troglodytes</i> ADIE        |     |                |                             |               |         |     |
| <i>Pongo abelii</i> ADIE           |     |                |                             |               |         |     |
| <i>Papio hamadryas</i> ADIE        |     |                |                             |               |         |     |
| <i>Callithrix jacchus</i> ADIE     |     |                |                             |               |         |     |
| <i>Otolemur garnettii</i> ADIE     |     |                |                             |               |         |     |
| <i>Mus musculus</i> Adie           |     |                |                             |               |         |     |
| <i>Rattus norvegicus</i> Adie      |     |                |                             |               |         |     |
| <i>Homo sapiens</i> ADIF1          | 80  | GKVEAKGIKGDQGS | SRGSPGKHGPKGLAGPMGEKGLRGETG | PQQQKGNKGDVGP | TGPEGPR | 139 |
| <i>Homo sapiens</i> ADIF2          | 80  | GKVEAKGIKGDQGS | SRGSPGKHGPKGLAGPMGEKGLRGETG | PQQQKGNKGDVGP | TGPEGPR | 139 |
| <i>Pan troglodytes</i> ADIF1       | 80  | GKVEAKGIKGDQGS | SRGSPGKHGPKGLAGPMGEKGLRGETG | PQQQKGNKGDVGP | TGPEGPR | 139 |
| <i>Pongo abelii</i> ADIF1          | 80  | GKVEAKGIKGDQGS | SRGSPGKHGPKGLAGPMGEKGLRGETG | PQQQKGNKGDVGP | TGPEGPR | 139 |
| <i>Nomascus leucogenys</i> ADIF1   | 80  | GKVEAKGIKGDQGS | SRGSPGKHGPKGLAGPMGEKGLRGETG | PQQQKGNKGDVGP | TGPEGPS | 139 |
| <i>Macaca mulatta</i> ADIF1        | 80  | GKVEAKGIKGDQGS | SRGSPGKHGPKGLAGPMGEKGLRGETG | PQQQKGNKGDVGP | TGPEGPR | 139 |
| <i>Papio hamadryas</i> ADIF1       | 80  | GKVEAKGIKGDQGS | SRGSPGKHGPKGLAGPMGEKGLRGETG | PQQQKGNKGDVGP | TGPEGPR | 139 |

|                                     |     |                                                                  |     |
|-------------------------------------|-----|------------------------------------------------------------------|-----|
| <i>Microcebus murinus</i> ADIF1     | 80  | GNVEAKGIKGDQGSRGPPGKHGPKGLLGPMEKGLQGETGPPQKQKGEKGDVGPPEGREGQR    | 139 |
| <i>Otolemur garnettii</i> ADIF1     | 80  | GNVEAKGIKGDQGSKGP GPKHGP KGLVGPMEKGIQGEPPGPEKGDVGLPGEGLR         | 139 |
| <i>Mus musculus</i> Adif1           | 109 | GRVEAKGIKGDPSRSGSPGKHGPKGSIGPTGEQGLPGETGPQQQKGDKEVGP TGPEGLM     | 168 |
| <i>Rattus norvegicus</i> Adif1      | 96  | GRVEAKGIKGDPSRSGSPGKHGPKGSIGPTGEQGLPGETGPQQQKGDKEVGP TGPEGLM     | 155 |
| <i>Cavia porcellus</i> ADIF1        | 80  | GKVEAKGIKGDPSRSGPPGKHGPKGSVGP TGERGLQGE MGPQQKGDKGDVGS PGPRLT    | 139 |
| <i>Oryctolagus cuniculus</i> ADIF1  | 80  | GKVEAKGIKGDQGSRGPPGKHGPKGSVGP MGE PGLQGETGLQGGKGDKGDVGP RPGEGLT  | 139 |
| <i>Ochotona princeps</i> ADIF1      | 80  | GKVEAKGMKGDPSRSGSPGKHGPKGSVGP VGE PGLQGETGPQQQKGEKGDVGPMPGEGQT   | 139 |
| <i>Bos taurus</i> ADIF1             | 80  | GHVEAKGIKGDQGSRGPPGKHGPKGLVGP PPEKGLTGETGPQQQKGEKGDVGPVGP EPE    | 139 |
| <i>Equus caballus</i> ADIF1         | 80  | GKVEAKGVKGDQGSRGSPGKHGPKGFVGP MGEKGLRGETGPQQQKGDKGDVGP TGPEGLK   | 139 |
| <i>Canis lupus familiaris</i> ADIF1 | 80  | GKVEAKGIKGDQGSRGPPGKHGPKGLVGP MGEKGLRGETGPQQQKGDKGGVGP SGPEGLK   | 139 |
| <i>Felis catus</i> ADIF1            | 80  | GKVEAKGIKGDQGSQGP GKHGPKGFVGP MGEKGLQGETGPRGP KGEKGDVGP TGPPGLQ  | 139 |
| <i>Dasyopus novemcinctus</i> ADIF1  | 81  | GRVEAKGIKGEQGSIGPPGKHGPKGFVGP MGEKGLRGETGPQQQKGGKGEVGP TGPPGLQ   | 140 |
| <i>Loxodonta africana</i> ADIF1     | 80  | GKVEAKGIKGEPPSRSGSPGKHGPKGFVGP MGEKGLKGETGPQQQKGSKGEVGP IGP EGLQ | 139 |
| <i>Homo sapiens</i> ADIG            | 135 | -----LR                                                          | 136 |
| <i>Pan troglodytes</i> ADIG         | 135 | -----LR                                                          | 136 |
| <i>Pongo abelii</i> ADIG            | 135 | -----LR                                                          | 136 |
| <i>Callithrix jacchus</i> ADIG      | 121 | -----LR                                                          | 122 |
| <i>Otolemur garnettii</i> ADIG      | 81  | -----LR                                                          | 82  |
| <i>Mus musculus</i> Adig            | 123 | -----LK                                                          | 124 |
| <i>Rattus norvegicus</i> Adig       | 124 | -----LK                                                          | 125 |
| <i>Cavia porcellus</i> ADIG         | 81  | -----LR                                                          | 82  |
| <i>Oryctolagus cuniculus</i> ADIG   | 81  | -----LR                                                          | 82  |
| <i>Tursiops truncatus</i> ADIG      | 133 | -----LR                                                          | 134 |
| <i>Bos taurus</i> ADIG              | 81  | -----LR                                                          | 82  |
| <i>Equus caballus</i> ADIG          | 122 | -----LR                                                          | 123 |
| <i>Canis lupus familiaris</i> ADIG  | 122 | -----LR                                                          | 123 |
| <i>Myotis lucifugus</i> ADIG        | 81  | -----LR                                                          | 82  |
| <i>Homo sapiens</i> ADIH            | 83  | -----PP                                                          | 84  |
| <i>Pan troglodytes</i> ADIH         | 83  | -----PP                                                          | 84  |
| <i>Pongo abelii</i> ADIH            | 83  | -----PP                                                          | 84  |
| <i>Nomascus leucogenys</i> ADIH     | 83  | -----PP                                                          | 84  |
| <i>Macaca mulatta</i> ADIH          | 83  | -----PP                                                          | 84  |
| <i>Papio hamadryas</i> ADIH         | 83  | -----PP                                                          | 84  |
| <i>Mus musculus</i> Adih            | 90  | -----PP                                                          | 91  |
| <i>Rattus norvegicus</i> Adih       | 127 | -----PP                                                          | 128 |
| <i>Dipodomys ordii</i> ADIH         | 83  | -----PP                                                          | 84  |
| <i>Cavia porcellus</i> ADIH         | 83  | -----PP                                                          | 84  |
| <i>Bos taurus</i> ADIH              | 100 | -----SP                                                          | 101 |
| <i>Equus caballus</i> ADIH          | 83  | -----PP                                                          | 84  |
| <i>Canis lupus familiaris</i> ADIH  | 83  | -----PP                                                          | 84  |
| <i>Pteropus vampyrus</i> ADIH       | 83  | -----PP                                                          | 84  |
| <i>Loxodonta africana</i> ADIH      | 83  | -----AP                                                          | 84  |
| <i>Homo sapiens</i> ADII            | -   | -----                                                            | -   |
| <i>Pongo abelii</i> ADII            | -   | -----                                                            | -   |
| <i>Macaca mulatta</i> ADII          | -   | -----                                                            | -   |
| <i>Mus musculus</i> Adii            | -   | -----                                                            | -   |
| <i>Rattus norvegicus</i> Adii       | -   | -----                                                            | -   |
| <i>Bos taurus</i> ADII              | -   | -----                                                            | -   |
| <i>Canis lupus familiaris</i> ADII  | -   | -----                                                            | -   |
| <i>Dasyopus novemcinctus</i> ADII   | -   | -----                                                            | -   |
| <i>Homo sapiens</i> ADIJ            | -   | -----                                                            | -   |
| <i>Pan troglodytes</i> ADIJ         | -   | -----                                                            | -   |
| <i>Papio hamadryas</i> ADIJ         | -   | -----                                                            | -   |
| <i>Mus musculus</i> Adij            | -   | -----                                                            | -   |
| <i>Rattus norvegicus</i> Adij       | -   | -----                                                            | -   |
| <i>Oryctolagus cuniculus</i> ADIJ   | -   | -----                                                            | -   |
| <i>Bos taurus</i> ADIJ              | -   | -----                                                            | -   |
| <i>Canis lupus familiaris</i> ADIJ  | -   | -----                                                            | -   |
| <i>Loxodonta africana</i> ADIJ      | -   | -----                                                            | -   |
| <i>Homo sapiens</i> ADIK            | -   | -----                                                            | -   |
| <i>Pan troglodytes</i> ADIK         | -   | -----                                                            | -   |
| <i>Gorilla gorilla</i> ADIK         | -   | -----                                                            | -   |
| <i>Papio hamadryas</i> ADIK         | -   | -----                                                            | -   |
| <i>Callithrix jacchus</i> ADIK      | -   | -----                                                            | -   |
| <i>Rattus norvegicus</i> Adik       | -   | -----                                                            | -   |
| <i>Cavia porcellus</i> ADIK         | -   | -----                                                            | -   |
| <i>Equus caballus</i> ADIK          | -   | -----                                                            | -   |
| <i>Canis lupus familiaris</i> ADIK  | -   | -----                                                            | -   |
| <i>Dasyopus novemcinctus</i> ADIK   | -   | -----                                                            | -   |
| <i>Loxodonta africana</i> ADIK      | -   | -----                                                            | -   |
| <i>Mus musculus</i> Adil            | -   | -----                                                            | -   |
| <i>Rattus norvegicus</i> Adil       | -   | -----                                                            | -   |
| <i>Homo sapiens</i> ADIM            | -   | -----                                                            | -   |
| <i>Pan troglodytes</i> ADIM         | -   | -----                                                            | -   |

|                                    |   |       |   |
|------------------------------------|---|-------|---|
| <i>Pongo abelii</i> ADIM           | - | ----- | - |
| <i>Nomascus leucogenys</i> ADIM    | - | ----- | - |
| <i>Papio hamadryas</i> ADIM        | - | ----- | - |
| <i>Callithrix jacchus</i> ADIM     | - | ----- | - |
| <i>Mus musculus</i> Adim           | - | ----- | - |
| <i>Rattus norvegicus</i> Adim      | - | ----- | - |
| <i>Cavia porcellus</i> ADIM        | - | ----- | - |
| <i>Bos taurus</i> ADIM             | - | ----- | - |
| <i>Equus caballus</i> ADIM         | - | ----- | - |
| <i>Canis lupus familiaris</i> ADIM | - | ----- | - |
| <i>Homo sapiens</i> ADIN           | - | ----- | - |
| <i>Pan troglodytes</i> ADIN        | - | ----- | - |
| <i>Pongo abelii</i> ADIN           | - | ----- | - |
| <i>Nomascus leucogenys</i> ADIN    | - | ----- | - |
| <i>Macaca mulatta</i> ADIN         | - | ----- | - |
| <i>Callithrix jacchus</i> ADIN     | - | ----- | - |
| <i>Mus musculus</i> Adin           | - | ----- | - |
| <i>Cavia porcellus</i> ADIN        | - | ----- | - |
| <i>Tursiops truncatus</i> ADIN     | - | ----- | - |
| <i>Canis lupus familiaris</i> ADIN | - | ----- | - |
| <i>Dasypus novemcinctus</i> ADIN   | - | ----- | - |
| <i>Loxodonta africana</i> ADIN     | - | ----- | - |
| <i>Homo sapiens</i> ADIO           | - | ----- | - |
| <i>Pan troglodytes</i> ADIO        | - | ----- | - |
| <i>Macaca mulatta</i> ADIO         | - | ----- | - |
| <i>Bos taurus</i> ADIO             | - | ----- | - |
| <i>Myotis lucifugus</i> ADIO       | - | ----- | - |
| <i>Homo sapiens</i> ADIP           | - | ----- | - |
| <i>Otolemur garnettii</i> ADIP     | - | ----- | - |
| <i>Mus musculus</i> Adip           | - | ----- | - |
| <i>Cavia porcellus</i> ADIP        | - | ----- | - |
| <i>Bos taurus</i> ADIP             | - | ----- | - |
| <i>Equus caballus</i> ADIP         | - | ----- | - |
| <i>Loxodonta africana</i> ADIP     | - | ----- | - |
| <i>Homo sapiens</i> ADIQ           | - | ----- | - |
| <i>Pan troglodytes</i> ADIQ        | - | ----- | - |
| <i>Pongo abelii</i> ADIQ           | - | ----- | - |
| <i>Nomascus leucogenys</i> ADIQ    | - | ----- | - |
| <i>Macaca mulatta</i> ADIQ         | - | ----- | - |
| <i>Mus musculus</i> Adiq           | - | ----- | - |
| <i>Rattus norvegicus</i> Adiq      | - | ----- | - |
| <i>Homo sapiens</i> ADIR           | - | ----- | - |
| <i>Pan troglodytes</i> ADIR        | - | ----- | - |
| <i>Pongo abelii</i> ADIR           | - | ----- | - |
| <i>Nomascus leucogenys</i> ADIR    | - | ----- | - |
| <i>Macaca mulatta</i> ADIR         | - | ----- | - |
| <i>Papio hamadryas</i> ADIR        | - | ----- | - |
| <i>Callithrix jacchus</i> ADIR     | - | ----- | - |
| <i>Tarsius syrichta</i> ADIR       | - | ----- | - |
| <i>Otolemur garnettii</i> ADIR     | - | ----- | - |
| <i>Tupaia belangeri</i> ADIR       | - | ----- | - |
| <i>Mus musculus</i> Adir           | - | ----- | - |
| <i>Rattus norvegicus</i> Adir      | - | ----- | - |
| <i>Cavia porcellus</i> ADIR        | - | ----- | - |
| <i>Oryctolagus cuniculus</i> ADIR  | - | ----- | - |
| <i>Tursiops truncatus</i> ADIR     | - | ----- | - |
| <i>Bos taurus</i> ADIR             | - | ----- | - |
| <i>Equus caballus</i> ADIR         | - | ----- | - |
| <i>Canis lupus familiaris</i> ADIR | - | ----- | - |
| <i>Myotis lucifugus</i> ADIR       | - | ----- | - |
| <i>Pteropus vampyrus</i> ADIR      | - | ----- | - |
| <i>Erinaceus europaeus</i> ADIR    | - | ----- | - |
| <i>Dasypus novemcinctus</i> ADIR   | - | ----- | - |
| <i>Choloepus hoffmanni</i> ADIR    | - | ----- | - |
| <i>Loxodonta africana</i> ADIR     | - | ----- | - |

*Homo sapiens* ADIA 64 -LPGL---AGDHGEF**EEKD**PI**GNPKV**PK**PM**PK**GP**AP**AP**PK**ES**GDY--- 116  
430 440 450 460 470 480

*Homo sapiens* ADIA 64 -LPGL---AGDHGEFGEKGDPIGNPKVGPKGPMGPKGGPAGAPGPKGESGDY--- 116  
*Papio hamadryas* ADIA 64 -LPGL---AGDHGEFGEKGDPIGNPKVGPKGPMGPKGGPAGAPGPKGESGDY--- 116  
*Mus musculus* Adia 91 -LPGL---AGDLGEFGEKGDPIGTPGKVGPKGPVGPKGTPGPSRPRGPKGDSGDY--- 143  
*Rattus norvegicus* Adia 62 -LPGL---AGDHGELGEKGDAGIPGIPGKVGPKGPVGPKGAPGPPGPRGPKGDSGDY--- 114  
*Cavia porcellus* ADIA 62 -SPGL---AGDHGEFGEKGDPIGNPKVGPKGPIGPKGAPGIPGGGPKGESGDY--- 114  
*Ochotona princeps* ADIA 62 -LPGL---AGDHGEFGEKGDPSFNPNGKVGPKGPVGPKGAPGLPGLRGPKGESGDY--- 114  
*Bos taurus* ADIA 58 -LPGL---VSHLNENGEKDDPGFPMGPKVGPKGPIGPKGVPPGVRGPKGESGDY--- 110  
*Equus caballus* ADIA 63 -LPGL---AAHRGNFGEKGEPIGNPKVGPKGPAKPKGAPGPPGARGPKGESGDY--- 115  
*Canis lupus familiaris* ADIA 61 -LPGL---AGDHGEFGEKGDPIGTPGKVGPKGPVGPKSPGPPGARGAKGESGDY--- 113  
*Felis catus* ADIA 65 -LPGL---AGDHGEFGEKGDPIGNPKVGPKGVPKSPGPPGARGPKGESGDY--- 117  
*Myotis lucifugus* ADIA 62 -LPGL---AGDHGEFGEKDDPGTPGKPKVGPKGVPVGPKGAPGLPGLRGPKGESGDY--- 114  
*Dasypus novemcinctus* ADIA 59 -LPGL---AGDHGEYGEKDDPGIPGNPKVGPKGVPVGPKSPGPPGARGPKGESGDY--- 111  
*Loxodonta africana* ADIA 62 -LPGL---AGDHGEFGEKDDPGTPGNPKVGPKGPIGPKGSPGSPGARGPKGESGDY--- 114  
*Homo sapiens* ADIB 62 -IPAI---PGIRGPKGQKGEPLPGHPGKNGPMGPPGMPGVPGPMGIPGEPGEEGRY--- 114  
*Pan troglodytes* ADIB 62 -IPAI---PGIRGPKGQKGEPLPGHPGKNGPMGPPGMPGVPGPMGIPGEPGEEGRY--- 114  
*Pongo abelii* ADIB 62 -IPAI---PGIRGPKGQKGEPLPGHPGKNGPMGPPGMPGVPGPMGIPGEPGEEGRY--- 114  
*Nomascus leucogenys* ADIB 63 -IPAI---PGIRGPKGQKGEPLPGHPGKNGPMGPPGMPGVPGPMGIPGEPGEEGRY--- 115  
*Callithrix jacchus* ADIB 61 -IPAI---PGTRGPKGQKGEPTGHPGKNGPMGPPGIPGVPGPIGIPGEPGEEGRY--- 113  
*Otolemur garnettii* ADIB 60 -MPAI---PGTRGPKGKGEPIGHPGKNGPMGPPGLPGVPGFMPGPEEGEGRY--- 112  
*Mus musculus* Adib 93 -IPAV---PGTRGPKGQKGEPMGPHRGKNGPRGTSGLPDGPRGPPGEPGVEGRY--- 145  
*Rattus norvegicus* Adib 85 -IPAI---PGTQGPKGQKGEPMGPHRGKNGPMGTSGPSGDPGPRGPPGEPGEEGRY--- 137  
*Cavia porcellus* ADIB 109 -IPAI---PGTRGPKGKGEPTGHPGKNGPMGAPMPGNPGRGPPGMPGEEGRY--- 161  
*Oryctolagus cuniculus* ADIB 115 -IPAI---PGTRGPKGQKGEPTGHPGKNGPMGSSGPPGDPGHRGPPGEPGVEGRY--- 167  
*Bos taurus* ADIB 60 -IPAA---PGTRGPKGQKDDPGTPGYGKNGPMGTPGIPGAPGTMGPPGEPGVEGRY--- 112  
*Equus caballus* ADIB 80 -IPAV---PGTQGPKGQKGEPTGHPGKNGPMGTSGLMAGLPLGLVGRGEPGEEGRY--- 132  
*Canis lupus familiaris* ADIB 62 -IPAI---PGTRGPKGQKGEPTGHPGKNGPMGTPGIPGVPGKNGPMGTPGIPGVPGPPGEPGEEGRY--- 114  
*Myotis lucifugus* ADIB 62 -IPAI---PGTRGPKGQKGEAGTPGFPKNGPMGAAGLPGTPGIMGNPGEEGEGRY--- 114  
*Loxodonta africana* ADIB 60 -IPAT---PRTRGPKGQKGEPTGHPGKNGPMGTSIPGDPGIQPPGEPGEEGRY--- 112  
*Homo sapiens* ADIC 56 -APGIR--TGIQGLKGDQGEPPGSGNPKVGYGPGSGLGARGIPGIKGKGNPNI--- 109  
*Macaca mulatta* ADIC 56 -APGIR--TGIQGLKGDQGEPPGSGNPKVGYGPGSGLGDRGIPGIKGKGNPNI--- 109  
*Papio hamadryas* ADIC 56 -APGIR--TGIQGLKGDQGEPPGSGNPKVGYGPGSGLGDRGIPGIKGKGNPNI--- 109  
*Callithrix jacchus* ADIC 56 -APGIR--TGIQGLKGDQGEPPGSGKMGYGPGSGLPGIHMPIGKIKGNPNI--- 109  
*Mus musculus* Adic 56 -AAGIR--TGIRGFKGDPGESGPPGKPGNVGLPGPSGLGDSGPPGLKGVKGNPNI--- 109  
*Rattus norvegicus* Adic 68 -AAGIR--TGIRGLKGDQGESGPPGKPGNVGFPPTGPLNSGPPGLKGVKGNPNI--- 121  
*Cavia porcellus* ADIC 55 -APGIR--TGIRGLKGDQGEPPGPKGNVGYGPGSPPGPEQGASGPRGMKGNPNI--- 108  
*Oryctolagus cuniculus* ADIC 97 -APGMR--TGIRGLKGDQEPGPPGSGNPKVGYGPGSGLGDRGIPGIKGKGNPNI--- 150  
*Equus caballus* ADIC 89 -APGIQ--TGIRGLKGDQGEPPGSGNMGYGPGSPPGVPAPGLKGIKGNPNI--- 142  
*Canis lupus familiaris* ADIC 75 -APGMR--TGIRGLKGDQDPPGPNPKNMGFPGSGMLLPGIPRRGPKGNPNI--- 128  
*Myotis lucifugus* ADIC 56 -APGIR--TGIRGLKGDQGEPPGPIGNMGYGPGSGLGNPAGLGIKGNPNI--- 109  
*Loxodonta africana* ADIC 71 -AAGIR--TGIQGLKGDQDPPGPKSGKMGFPGSPGTPGISPPGLKGLGNPNI--- 124  
*Homo sapiens* ADID 104 -----LIGPKGDIETGVPGAEGPRGFPGIQRKKEP---GEG--- 138  
*Pan troglodytes* ADID 104 -----LIGPKGDIETGVPGAEGPRGFPGIQRKKEP---GEG--- 138  
*Pongo abelii* ADID 73 -----LIGPKGDIETGVPGAEGPRGFPGIQRKKEP---GEG--- 107  
*Nomascus leucogenys* ADID 103 -----LIGPKGDIETGVPGAEGPRGFPGIQRKKEP---GEG--- 137  
*Macaca mulatta* ADID 102 -----LIGPKGDTGETGVTGAEGPRGFPGIQRKKEP---GEG--- 136  
*Otolemur garnettii* ADID 73 -----LVGPKGDTGETGVTGAEGPRGFPGTPGRKKEP---GEG--- 107  
*Mus musculus* Adid 87 -----LLGPKGETGDVGMTGAEGPRGFPGTPGRKKEP---GEA--- 121  
*Rattus norvegicus* Adid 73 -----VLGPKGDPGDAGMTGAEGPRGFPGTPGRKKEP---GEA--- 107  
*Cavia porcellus* ADID 115 -----FVGPKGDTGETGVTGAEGPRGFPGVPGRKGER---GQD--- 149  
*Oryctolagus cuniculus* ADID 83 -----LVGPKGDTGETGVTGAEGPRGFPGSPGRKKEP---GEG--- 117  
*Bos taurus* ADID 68 -----LVGPKGDTGETGITGIEGPRGFPGTPGRKKEP---GES--- 102  
*Equus caballus* ADID 130 -----LVGPKGDAGETGVPVEGPRGFPGIPGRKKEP---GES--- 164  
*Canis lupus familiaris* ADID 82 -----LVGPKGDTGETGVTGVEGPRGFPGTPGRKKEP---GES--- 116  
*Felis catus* ADID 73 -----LVGPKGDTGETGVTGIEGPRGFPGIPGRKKEP---GES--- 107  
*Myotis lucifugus* ADID 82 -----LVGPKGDTGETGVTGVEGPRGFPGVQGRKKEP---GES--- 116  
*Dasypus novemcinctus* ADID 72 -----LLGPKGDSGEIGVSGVEGPRGFPGIPGRKKEP---GES--- 106  
*Loxodonta africana* ADID 73 -----LIGPKGDTGETGVTGVEGPRGFPGTPGRKKEP---GEA--- 107  
*Homo sapiens* ADIE 73 -----LPGPRGDPGRGEAGPAGPTGPAGEC--- 98  
*Pan troglodytes* ADIE 73 -----LPGPRGDPGRGEAGPAGPTGPAGEC--- 98  
*Pongo abelii* ADIE 73 -----LPGPRGEPGRGEAGPAGPTGPAGEC--- 98  
*Papio hamadryas* ADIE 73 -----LPGPRGEPGRGEAGPAGPTGPAGEC--- 98  
*Callithrix jacchus* ADIE 73 -----LPGPRGEPGRGEAGPAGPTGPAGEC--- 98  
*Otolemur garnettii* ADIE 73 -----LPGPRGEPGRGEAGPAGATGPAGEC--- 98  
*Mus musculus* Adie 73 -----LPGPRGEPGRGEAGPMGAI GPAGEC--- 98  
*Rattus norvegicus* Adie 73 -----LPGPRGEPGRGEAGPVGAI GPAGEC--- 98  
*Homo sapiens* ADIF1 140 GNIGPLGPTGLPGMGPPIGKPGPKGEAGPTGPQGEPPVIRGWKDRGEKGI GET--- 196  
*Homo sapiens* ADIF2 140 GNIGPLGPTGLPGMGPPIGKPGPKGEAGPTGPQGEPPVIRGWKDRGEKGI GET--- 196  
*Pan troglodytes* ADIF1 140 GNIGPLGPTGLPGMGPPIGKPGPKGEAGPTGPQGEPPVIRGWKDRGEKGI GET--- 196  
*Pongo abelii* ADIF1 140 GNIGPLGPTGLPGMGPPIGKPGPKGEAGPTGPQGEPPVIRGWKDRGEKGI GET--- 196  
*Nomascus leucogenys* ADIF1 140 GNIGPLGPTGLPGMGPPIGTPPKGEAGPTGPQGEPPVIRGWKDRGEKGI GET--- 196  
*Macaca mulatta* ADIF1 140 GDIGPLGPTGLPGMGPPIGKPGPKGEAGPTGPQGEPPVIRGWKDRGEKGI GET--- 196  
*Papio hamadryas* ADIF1 140 GDIGPLGPTGLPGSMGPPIGKPGPKGEAGPTGPQGEPPVIRGWKDRGEKGI GET--- 196

|                                     |     |                                                         |     |
|-------------------------------------|-----|---------------------------------------------------------|-----|
| <i>Microcebus murinus</i> ADIF1     | 140 | GHTGPLGPTGLPGVPGVPIGKPGPKGEAGPVGPQGEPEGVRGIRGWKDRGEKGI  | 196 |
| <i>Otolemur garnettii</i> ADIF1     | 140 | GNTGPGSPTGVPVGPVPGKPKGLKGEAGPVGPQGEPEGVRGLRGWKDRGEKGI   | 196 |
| <i>Mus musculus</i> Adif1           | 169 | GSTGPLGPKLPGPMGPIGKPGPRGEAGPMGPQGEPEGVRGMRGWKDRGEKGV    | 225 |
| <i>Rattus norvegicus</i> Adif1      | 156 | GSTGPLGPKLPGVPGVPIGKPGPRGEAGPMGPQGEPEGVRGMRGWKDRGEKGV   | 212 |
| <i>Cavia porcellus</i> ADIF1        | 140 | GSTGPLGPTGLTGPMPGPIGKPGPKGEAGPIGPQGEPEGVRGIRGWKDRGEKGI  | 196 |
| <i>Oryctolagus cuniculus</i> ADIF1  | 140 | GDPGPLGPNLPGVPGVPIGKPGPKGEAGPVGPQGEPEGVRGIRGWKDRGEKGI   | 196 |
| <i>Ochotona princeps</i> ADIF1      | 140 | GDPGPAAGMGLRGPVPGI                                      | 196 |
| <i>Bos taurus</i> ADIF1             | 140 | GSTGPGSPTGLLGPVPGI                                      | 196 |
| <i>Equus caballus</i> ADIF1         | 140 | GNTGLSGPPGLPGPIGPIGKPGPKGDAGPLGPQGEPEGVRGMRGWKDRGEKGI   | 196 |
| <i>Canis lupus familiaris</i> ADIF1 | 140 | GSTGPGSPTGLPGMPGPIGKPGPKGDAGPLGPQGEPEGVRGMRGWKDRGEKGI   | 196 |
| <i>Felis catus</i> ADIF1            | 140 | GHTGPGSPTGLPGMPVPGKPGPKGDAGPLGPQGEPEGVRGMRGWKDRGEKGI    | 196 |
| <i>Dasyurus novemcinctus</i> ADIF1  | 141 | GNAGPSGPMGPPGVPVPIGKPGPKGEAGPLGPQGEPEGVRGMRGWKDRGEKGI   | 197 |
| <i>Loxodonta africana</i> ADIF1     | 140 | GNPGPLGTTGLRGPVPGI                                      | 196 |
| <i>Homo sapiens</i> ADIG            | 137 | GKTGPLGLAGEKGDQGETGKKGPIGPEGEKGEVGPVPPGPKGDRGEQDGLPGVC  | 193 |
| <i>Pan troglodytes</i> ADIG         | 137 | GKTGPLGLAGEKGDQGETGKKGPIGPEGEKGEVGPVPPGPKGDRGEQDGLPGVC  | 193 |
| <i>Pongo abelii</i> ADIG            | 137 | GKTGPLGLAGEKGDQGETGKKGPMGPEGEKGEVGPVPPGPKGDRGEQDGLPGVC  | 193 |
| <i>Callithrix jacchus</i> ADIG      | 123 | GKTGPLGLAGEKGDQGETGKKGPMGPEGEKGEVGPVPPGPKGDRGEQDGLPGVC  | 179 |
| <i>Otolemur garnettii</i> ADIG      | 83  | GKTGPGVGLAGEKGDQGETGKKGPMGPEGEKGEVGPVPPGPKGDRGEQDGLPGVC | 139 |
| <i>Mus musculus</i> Adig            | 125 | GKTGPLGLAGEKGDQGETGKKGPIGPEGEKGEVGPVPPGPKGDRGEQDGLPGVC  | 181 |
| <i>Rattus norvegicus</i> Adig       | 126 | GKTGPLGLAGEKGDQGETGKKGPIGPEGEKGEVGPVPPGPKGDRGEQDGLPGVC  | 182 |
| <i>Cavia porcellus</i> ADIG         | 83  | GKTGPLGLAGEKGDQGETGKKGPIGPEGEKGEVGPVPPGPKGDRGEQDGLPGVC  | 139 |
| <i>Oryctolagus cuniculus</i> ADIG   | 83  | GKTGPLGLAGEKGDQGETGKKGPMGPEGEKGEVGPVPPGPKGDRGEQDGLPGVC  | 139 |
| <i>Tursiops truncatus</i> ADIG      | 135 | GKTGPLGLAGEKGDQGETGKKGPMGPEGEKGEVGPVPPGPKGDRGEQDGLPGVC  | 191 |
| <i>Bos taurus</i> ADIG              | 83  | GKAGPLGLAGEKGDQGETGKKGPMGPEGEKGEVGPVPPGPKGDRGEQDGLPGVC  | 139 |
| <i>Equus caballus</i> ADIG          | 124 | GKTGPLGLAGEKGDQGETGKKGPMGPEGEKGEVGPVPPGPKGDRGEQDGLPGVC  | 180 |
| <i>Canis lupus familiaris</i> ADIG  | 124 | GKTGPLGLAGEKGDQGETGKKGPMGPEGEKGEVGPVPPGPKGDRGEQDGLPGVC  | 180 |
| <i>Myotis lucifugus</i> ADIG        | 83  | GKTGPLGLAGEKGDQGETGKKGPMGPEGEKGEVGPVPPGPKGDRGEQDGLPGVC  | 139 |
| <i>Homo sapiens</i> ADIH            | 85  | GRTGNRGKPKGKAGAI                                        | 141 |
| <i>Pan troglodytes</i> ADIH         | 85  | GRTGNRGKPKGKAGAI                                        | 141 |
| <i>Pongo abelii</i> ADIH            | 85  | GRTGNRGKPKGKAGAI                                        | 141 |
| <i>Nomascus leucogenys</i> ADIH     | 85  | GRTGNRGKPKGKAGAI                                        | 141 |
| <i>Macaca mulatta</i> ADIH          | 85  | GRTGNRGKPKGKAGAI                                        | 141 |
| <i>Papio hamadryas</i> ADIH         | 85  | GRTGNRGKPKGKAGAI                                        | 141 |
| <i>Mus musculus</i> Adih            | 92  | GRTGNRGKQGP                                             | 148 |
| <i>Rattus norvegicus</i> Adih       | 129 | GRTGNRGKQGP                                             | 185 |
| <i>Dipodomys ordii</i> ADIH         | 85  | GRTGNRGKQGP                                             | 141 |
| <i>Cavia porcellus</i> ADIH         | 85  | GRTGNRGKQGP                                             | 141 |
| <i>Bos taurus</i> ADIH              | 102 | GRTGNRGKQGP                                             | 158 |
| <i>Equus caballus</i> ADIH          | 85  | GRTGNRGKQGP                                             | 141 |
| <i>Canis lupus familiaris</i> ADIH  | 85  | GRTGNRGKQGP                                             | 141 |
| <i>Pteropus vampyrus</i> ADIH       | 85  | GRTGNRGKQGP                                             | 141 |
| <i>Loxodonta africana</i> ADIH      | 85  | GRAGNRGKQGP                                             | 141 |
| <i>Homo sapiens</i> ADII            | -   | -                                                       | -   |
| <i>Pongo abelii</i> ADII            | -   | -                                                       | -   |
| <i>Macaca mulatta</i> ADII          | -   | -                                                       | -   |
| <i>Mus musculus</i> Adii            | -   | -                                                       | -   |
| <i>Rattus norvegicus</i> Adii       | -   | -                                                       | -   |
| <i>Bos taurus</i> ADII              | -   | -                                                       | -   |
| <i>Canis lupus familiaris</i> ADII  | -   | -                                                       | -   |
| <i>Dasyurus novemcinctus</i> ADII   | -   | -                                                       | -   |
| <i>Homo sapiens</i> ADIJ            | -   | -                                                       | -   |
| <i>Pan troglodytes</i> ADIJ         | -   | -                                                       | -   |
| <i>Papio hamadryas</i> ADIJ         | -   | -                                                       | -   |
| <i>Mus musculus</i> Adij            | -   | -                                                       | -   |
| <i>Rattus norvegicus</i> Adij       | -   | -                                                       | -   |
| <i>Oryctolagus cuniculus</i> ADIJ   | -   | -                                                       | -   |
| <i>Bos taurus</i> ADIJ              | -   | -                                                       | -   |
| <i>Canis lupus familiaris</i> ADIJ  | -   | -                                                       | -   |
| <i>Loxodonta africana</i> ADIJ      | -   | -                                                       | -   |
| <i>Homo sapiens</i> ADIK            | -   | -                                                       | -   |
| <i>Pan troglodytes</i> ADIK         | -   | -                                                       | -   |
| <i>Gorilla gorilla</i> ADIK         | -   | -                                                       | -   |
| <i>Papio hamadryas</i> ADIK         | -   | -                                                       | -   |
| <i>Callithrix jacchus</i> ADIK      | -   | -                                                       | -   |
| <i>Rattus norvegicus</i> Adik       | -   | -                                                       | -   |
| <i>Cavia porcellus</i> ADIK         | -   | -                                                       | -   |
| <i>Equus caballus</i> ADIK          | -   | -                                                       | -   |
| <i>Canis lupus familiaris</i> ADIK  | -   | -                                                       | -   |
| <i>Dasyurus novemcinctus</i> ADIK   | -   | -                                                       | -   |
| <i>Loxodonta africana</i> ADIK      | -   | -                                                       | -   |
| <i>Mus musculus</i> Adil            | -   | -                                                       | -   |
| <i>Rattus norvegicus</i> Adil       | -   | -                                                       | -   |
| <i>Homo sapiens</i> ADIM            | 178 | -----NHGNNNGNNGATGHEGAKGEKGDKGLGPRGERGQHGPKEKGYPGIP     | 224 |
| <i>Pan troglodytes</i> ADIM         | 178 | -----NHGNNNGNNGATGHEGAKGEKGDKGLGPRGERGQHGPKEKGYPGIP     | 224 |

|                                    |     |                                                           |     |
|------------------------------------|-----|-----------------------------------------------------------|-----|
| <i>Pongo abelii</i> ADIM           | 134 | -----NHGNNNGNNGATGHEGAKGEKGDKGDLDLPRGERGQHGPKEKGYPGIP---  | 180 |
| <i>Nomascus leucogenys</i> ADIM    | 178 | -----NHGNNNGNNGATGHEGAKGEKGDKGDLDLPRGERGQHGPKEKGYPGIP---  | 224 |
| <i>Papio hamadryas</i> ADIM        | 178 | -----NHGNNNGNNGATGHEGAKGEKGDKGDLDLPRGERGQHGPKEKGYPGIP---  | 224 |
| <i>Callithrix jacchus</i> ADIM     | 168 | -----NHGNNNGNNGATGHEGAKGEKGDKGDLDLPRGERGQHGPKEKGYPGIP---  | 214 |
| <i>Mus musculus</i> Adim           | 67  | -----NHGNNNGNNGATGHEGAKGEKGDKGDLDLPRGERGQHGPKEKGYPGVP---  | 113 |
| <i>Rattus norvegicus</i> Adim      | 141 | -----NHGNNNGNNGATGHEGAKGEKGDKGDLDLPRGERGQHGPKEKGYPGVP---  | 187 |
| <i>Cavia porcellus</i> ADIM        | 134 | -----NHGNNNGNNGATGHEGAKGEKGDKGDLDLPRGERGQHGPKEKGSFGIP---  | 180 |
| <i>Bos taurus</i> ADIM             | 67  | -----NHGNNNGNNGATGHEGAKGEKGDKGDLDLPRGERGQHGPKEKGYPGIP---  | 113 |
| <i>Equus caballus</i> ADIM         | 67  | -----NHGNNNGNNGATGHEGAKGEKGDKGDLDLPRGERGQHGPKEKGHPPGIP--- | 113 |
| <i>Canis lupus familiaris</i> ADIM | 128 | -----NHGNNNGNNGATGHEGAKGEKGDKGDLDLPRGERGQHGPKEKGYPGIP---  | 174 |
| <i>Homo sapiens</i> ADIN           | 17  | -----LGP                                                  | 19  |
| <i>Pan troglodytes</i> ADIN        | 17  | -----LGP                                                  | 19  |
| <i>Pongo abelii</i> ADIN           | 17  | -----LGP                                                  | 19  |
| <i>Nomascus leucogenys</i> ADIN    | 17  | -----LGP                                                  | 19  |
| <i>Macaca mulatta</i> ADIN         | 17  | -----LGP                                                  | 19  |
| <i>Callithrix jacchus</i> ADIN     | 17  | -----LGP                                                  | 19  |
| <i>Mus musculus</i> Adin           | 17  | -----LGP                                                  | 19  |
| <i>Cavia porcellus</i> ADIN        | 28  | -----LGP                                                  | 30  |
| <i>Tursiops truncatus</i> ADIN     | 17  | -----LGP                                                  | 19  |
| <i>Canis lupus familiaris</i> ADIN | 17  | -----LGP                                                  | 19  |
| <i>Dasyops novemcinctus</i> ADIN   | 17  | -----LGA                                                  | 19  |
| <i>Loxodonta africana</i> ADIN     | 17  | -----LGP                                                  | 19  |
| <i>Homo sapiens</i> ADIO           | 71  | -----EKGEAGVRGRAGRSKKEGPPGARGLQGRKQKQGVPPGAA---           | 111 |
| <i>Pan troglodytes</i> ADIO        | 71  | -----EKGEAGVRGRAGRSKKEGLPGARGLQGRKQKQGVPPGAA---           | 111 |
| <i>Macaca mulatta</i> ADIO         | 66  | -----EKGEAGVRGRAGRSKKEGPPGARGLQGRKQKQGVPPGAP---           | 106 |
| <i>Bos taurus</i> ADIO             | 70  | -----EKGEAGVRGRSRSRSKKEGPPSRLRGRKQKQAGLPGAQ---            | 110 |
| <i>Myotis lucifugus</i> ADIO       | 70  | -----EKGETGVRGRSRSRSKKEGPPSPGLRHKQKQGVGLPGTP---           | 110 |
| <i>Homo sapiens</i> ADIP           | 198 | -----EKGDRGDRGLQGGKYGKTGSAGARGHTGPKQKGSMPAGER---          | 238 |
| <i>Otolemur garnettii</i> ADIP     | 100 | -----EKGDRGDRGLQGGKYGKTGSAGARGHVGPQKQKGSMPGDR---          | 140 |
| <i>Mus musculus</i> Adip           | 100 | -----EKGDRGDRGLQGGKYGKTGSAGARGHVGPQKQKGSMPGDR---          | 140 |
| <i>Cavia porcellus</i> ADIP        | 100 | -----EKGDRGDRGLQGGKYGKTGSAGARGHVGPQKQKGSMPGDR---          | 140 |
| <i>Bos taurus</i> ADIP             | 123 | -----EKGDRGDRGLQGGKYGKTGSAGARGHTGPKQKQKGSMPGDR---         | 163 |
| <i>Equus caballus</i> ADIP         | 98  | -----EKGDRGDRGLQGGKYGKPGSVGARGHVGPQKQKGSMPGDR---          | 138 |
| <i>Loxodonta africana</i> ADIP     | 152 | -----EKGDRGDRGLQGGKYGKTGSAGARGHMGPKQKQKGSMPGDR---         | 192 |
| <i>Homo sapiens</i> ADIQ           | 98  | -----DKGDPGPMGLPGYMGREGPQGEPPGQGSKDKGEMGSPGAP---          | 138 |
| <i>Pan troglodytes</i> ADIQ        | 98  | -----DKGDPGPMGLPGYMGREGPQGEPPGQGSKDKGEMGSPGAP---          | 138 |
| <i>Pongo abelii</i> ADIQ           | 98  | -----DKGDPGPMGLPGYMGREGPQGEPPGQGSKDKGEMGSPGAP---          | 138 |
| <i>Nomascus leucogenys</i> ADIQ    | 98  | -----DKGDPGPMGLPGYMGREGPQGEPPGQGSKDKGEMGSPGAP---          | 138 |
| <i>Macaca mulatta</i> ADIQ         | 98  | -----DKGDPGAMGLPGHMGREGPQGEPPGQGSKDKGEMGSPSAP---          | 138 |
| <i>Mus musculus</i> Adiq           | 84  | -----DKGDRGPTGTPGKPKNGNTRGDRGSQGVKDKGQAGSPGSS---          | 124 |
| <i>Rattus norvegicus</i> Adiq      | 83  | -----DKGDRGPTGTPGKPKNGNTRGDRGSQGVKDKGQAGSPGSS---          | 123 |
| <i>Homo sapiens</i> ADIR           | -   | -----                                                     | -   |
| <i>Pan troglodytes</i> ADIR        | -   | -----                                                     | -   |
| <i>Pongo abelii</i> ADIR           | -   | -----                                                     | -   |
| <i>Nomascus leucogenys</i> ADIR    | -   | -----                                                     | -   |
| <i>Macaca mulatta</i> ADIR         | -   | -----                                                     | -   |
| <i>Papio hamadryas</i> ADIR        | -   | -----                                                     | -   |
| <i>Callithrix jacchus</i> ADIR     | -   | -----                                                     | -   |
| <i>Tarsius syrichta</i> ADIR       | -   | -----                                                     | -   |
| <i>Otolemur garnettii</i> ADIR     | -   | -----                                                     | -   |
| <i>Tupaia belangeri</i> ADIR       | -   | -----                                                     | -   |
| <i>Mus musculus</i> Adir           | -   | -----                                                     | -   |
| <i>Rattus norvegicus</i> Adir      | -   | -----                                                     | -   |
| <i>Cavia porcellus</i> ADIR        | -   | -----                                                     | -   |
| <i>Oryctolagus cuniculus</i> ADIR  | -   | -----                                                     | -   |
| <i>Tursiops truncatus</i> ADIR     | -   | -----                                                     | -   |
| <i>Bos taurus</i> ADIR             | -   | -----                                                     | -   |
| <i>Equus caballus</i> ADIR         | -   | -----                                                     | -   |
| <i>Canis lupus familiaris</i> ADIR | -   | -----                                                     | -   |
| <i>Myotis lucifugus</i> ADIR       | -   | -----                                                     | -   |
| <i>Pteropus vampyrus</i> ADIR      | -   | -----                                                     | -   |
| <i>Erinaceus europaeus</i> ADIR    | -   | -----                                                     | -   |
| <i>Dasyops novemcinctus</i> ADIR   | -   | -----                                                     | -   |
| <i>Choloepus hoffmanni</i> ADIR    | -   | -----                                                     | -   |
| <i>Loxodonta africana</i> ADIR     | -   | -----                                                     | -   |



|                                    | 490 | 500 | 510 | 520 | 530 | 540 |
|------------------------------------|-----|-----|-----|-----|-----|-----|
| <i>Homo sapiens</i> ADIA           |     |     |     |     |     |     |
| <i>Homo sapiens</i> ADIA           |     |     |     |     |     |     |
| <i>Papio hamadryas</i> ADIA        |     |     |     |     |     |     |
| <i>Mus musculus</i> Adia           |     |     |     |     |     |     |
| <i>Rattus norvegicus</i> Adia      |     |     |     |     |     |     |
| <i>Cavia porcellus</i> ADIA        |     |     |     |     |     |     |
| <i>Ochotona princeps</i> ADIA      |     |     |     |     |     |     |
| <i>Bos taurus</i> ADIA             |     |     |     |     |     |     |
| <i>Equus caballus</i> ADIA         |     |     |     |     |     |     |
| <i>Canis lupus familiaris</i> ADIA |     |     |     |     |     |     |
| <i>Felis catus</i> ADIA            |     |     |     |     |     |     |
| <i>Myotis lucifugus</i> ADIA       |     |     |     |     |     |     |
| <i>Dasyopus novemcinctus</i> ADIA  |     |     |     |     |     |     |
| <i>Loxodonta africana</i> ADIA     |     |     |     |     |     |     |
| <i>Homo sapiens</i> ADIB           |     |     |     |     |     |     |
| <i>Pan troglodytes</i> ADIB        |     |     |     |     |     |     |
| <i>Pongo abelii</i> ADIB           |     |     |     |     |     |     |
| <i>Nomascus leucogenys</i> ADIB    |     |     |     |     |     |     |
| <i>Callithrix jacchus</i> ADIB     |     |     |     |     |     |     |
| <i>Otolemur garnettii</i> ADIB     |     |     |     |     |     |     |
| <i>Mus musculus</i> Adib           |     |     |     |     |     |     |
| <i>Rattus norvegicus</i> Adib      |     |     |     |     |     |     |
| <i>Cavia porcellus</i> ADIB        |     |     |     |     |     |     |
| <i>Oryctolagus cuniculus</i> ADIB  |     |     |     |     |     |     |
| <i>Bos taurus</i> ADIB             |     |     |     |     |     |     |
| <i>Equus caballus</i> ADIB         |     |     |     |     |     |     |
| <i>Canis lupus familiaris</i> ADIB |     |     |     |     |     |     |
| <i>Myotis lucifugus</i> ADIB       |     |     |     |     |     |     |
| <i>Loxodonta africana</i> ADIB     |     |     |     |     |     |     |
| <i>Homo sapiens</i> ADIC           |     |     |     |     |     |     |
| <i>Macaca mulatta</i> ADIC         |     |     |     |     |     |     |
| <i>Papio hamadryas</i> ADIC        |     |     |     |     |     |     |
| <i>Callithrix jacchus</i> ADIC     |     |     |     |     |     |     |
| <i>Mus musculus</i> Adic           |     |     |     |     |     |     |
| <i>Rattus norvegicus</i> Adic      |     |     |     |     |     |     |
| <i>Cavia porcellus</i> ADIC        |     |     |     |     |     |     |
| <i>Oryctolagus cuniculus</i> ADIC  |     |     |     |     |     |     |
| <i>Equus caballus</i> ADIC         |     |     |     |     |     |     |
| <i>Canis lupus familiaris</i> ADIC |     |     |     |     |     |     |
| <i>Myotis lucifugus</i> ADIC       |     |     |     |     |     |     |
| <i>Loxodonta africana</i> ADIC     |     |     |     |     |     |     |
| <i>Homo sapiens</i> ADID           |     |     |     |     |     |     |
| <i>Pan troglodytes</i> ADID        |     |     |     |     |     |     |
| <i>Pongo abelii</i> ADID           |     |     |     |     |     |     |
| <i>Nomascus leucogenys</i> ADID    |     |     |     |     |     |     |
| <i>Macaca mulatta</i> ADID         |     |     |     |     |     |     |
| <i>Otolemur garnettii</i> ADID     |     |     |     |     |     |     |
| <i>Mus musculus</i> Adid           |     |     |     |     |     |     |
| <i>Rattus norvegicus</i> Adid      |     |     |     |     |     |     |
| <i>Cavia porcellus</i> ADID        |     |     |     |     |     |     |
| <i>Oryctolagus cuniculus</i> ADID  |     |     |     |     |     |     |
| <i>Bos taurus</i> ADID             |     |     |     |     |     |     |
| <i>Equus caballus</i> ADID         |     |     |     |     |     |     |
| <i>Canis lupus familiaris</i> ADID |     |     |     |     |     |     |
| <i>Felis catus</i> ADID            |     |     |     |     |     |     |
| <i>Myotis lucifugus</i> ADID       |     |     |     |     |     |     |
| <i>Dasyopus novemcinctus</i> ADID  |     |     |     |     |     |     |
| <i>Loxodonta africana</i> ADID     |     |     |     |     |     |     |
| <i>Homo sapiens</i> ADIE           |     |     |     |     |     |     |
| <i>Pan troglodytes</i> ADIE        |     |     |     |     |     |     |
| <i>Pongo abelii</i> ADIE           |     |     |     |     |     |     |
| <i>Papio hamadryas</i> ADIE        |     |     |     |     |     |     |
| <i>Callithrix jacchus</i> ADIE     |     |     |     |     |     |     |
| <i>Otolemur garnettii</i> ADIE     |     |     |     |     |     |     |
| <i>Mus musculus</i> Adie           |     |     |     |     |     |     |
| <i>Rattus norvegicus</i> Adie      |     |     |     |     |     |     |
| <i>Homo sapiens</i> ADIF1          |     |     |     |     |     |     |
| <i>Homo sapiens</i> ADIF2          |     |     |     |     |     |     |
| <i>Pan troglodytes</i> ADIF1       |     |     |     |     |     |     |
| <i>Pongo abelii</i> ADIF1          |     |     |     |     |     |     |
| <i>Nomascus leucogenys</i> ADIF1   |     |     |     |     |     |     |
| <i>Macaca mulatta</i> ADIF1        |     |     |     |     |     |     |
| <i>Papio hamadryas</i> ADIF1       |     |     |     |     |     |     |

|                                     |   |       |   |
|-------------------------------------|---|-------|---|
| <i>Microcebus murinus</i> ADIF1     | - | ----- | - |
| <i>Otolemur garnettii</i> ADIF1     | - | ----- | - |
| <i>Mus musculus</i> Adif1           | - | ----- | - |
| <i>Rattus norvegicus</i> Adif1      | - | ----- | - |
| <i>Cavia porcellus</i> ADIF1        | - | ----- | - |
| <i>Oryctolagus cuniculus</i> ADIF1  | - | ----- | - |
| <i>Ochotona princeps</i> ADIF1      | - | ----- | - |
| <i>Bos taurus</i> ADIF1             | - | ----- | - |
| <i>Equus caballus</i> ADIF1         | - | ----- | - |
| <i>Canis lupus familiaris</i> ADIF1 | - | ----- | - |
| <i>Felis catus</i> ADIF1            | - | ----- | - |
| <i>Dasyopus novemcinctus</i> ADIF1  | - | ----- | - |
| <i>Loxodonta africana</i> ADIF1     | - | ----- | - |
| <i>Homo sapiens</i> ADIG            | - | ----- | - |
| <i>Pan troglodytes</i> ADIG         | - | ----- | - |
| <i>Pongo abelii</i> ADIG            | - | ----- | - |
| <i>Callithrix jacchus</i> ADIG      | - | ----- | - |
| <i>Otolemur garnettii</i> ADIG      | - | ----- | - |
| <i>Mus musculus</i> Adig            | - | ----- | - |
| <i>Rattus norvegicus</i> Adig       | - | ----- | - |
| <i>Cavia porcellus</i> ADIG         | - | ----- | - |
| <i>Oryctolagus cuniculus</i> ADIG   | - | ----- | - |
| <i>Tursiops truncatus</i> ADIG      | - | ----- | - |
| <i>Bos taurus</i> ADIG              | - | ----- | - |
| <i>Equus caballus</i> ADIG          | - | ----- | - |
| <i>Canis lupus familiaris</i> ADIG  | - | ----- | - |
| <i>Myotis lucifugus</i> ADIG        | - | ----- | - |
| <i>Homo sapiens</i> ADIH            | - | ----- | - |
| <i>Pan troglodytes</i> ADIH         | - | ----- | - |
| <i>Pongo abelii</i> ADIH            | - | ----- | - |
| <i>Nomascus leucogenys</i> ADIH     | - | ----- | - |
| <i>Macaca mulatta</i> ADIH          | - | ----- | - |
| <i>Papio hamadryas</i> ADIH         | - | ----- | - |
| <i>Mus musculus</i> Adih            | - | ----- | - |
| <i>Rattus norvegicus</i> Adih       | - | ----- | - |
| <i>Dipodomys ordii</i> ADIH         | - | ----- | - |
| <i>Cavia porcellus</i> ADIH         | - | ----- | - |
| <i>Bos taurus</i> ADIH              | - | ----- | - |
| <i>Equus caballus</i> ADIH          | - | ----- | - |
| <i>Canis lupus familiaris</i> ADIH  | - | ----- | - |
| <i>Pteropus vampyrus</i> ADIH       | - | ----- | - |
| <i>Loxodonta africana</i> ADIH      | - | ----- | - |
| <i>Homo sapiens</i> ADII            | - | ----- | - |
| <i>Pongo abelii</i> ADII            | - | ----- | - |
| <i>Macaca mulatta</i> ADII          | - | ----- | - |
| <i>Mus musculus</i> Adii            | - | ----- | - |
| <i>Rattus norvegicus</i> Adii       | - | ----- | - |
| <i>Bos taurus</i> ADII              | - | ----- | - |
| <i>Canis lupus familiaris</i> ADII  | - | ----- | - |
| <i>Dasyopus novemcinctus</i> ADII   | - | ----- | - |
| <i>Homo sapiens</i> ADIJ            | - | ----- | - |
| <i>Pan troglodytes</i> ADIJ         | - | ----- | - |
| <i>Papio hamadryas</i> ADIJ         | - | ----- | - |
| <i>Mus musculus</i> Adij            | - | ----- | - |
| <i>Rattus norvegicus</i> Adij       | - | ----- | - |
| <i>Oryctolagus cuniculus</i> ADIJ   | - | ----- | - |
| <i>Bos taurus</i> ADIJ              | - | ----- | - |
| <i>Canis lupus familiaris</i> ADIJ  | - | ----- | - |
| <i>Loxodonta africana</i> ADIJ      | - | ----- | - |
| <i>Homo sapiens</i> ADIK            | - | ----- | - |
| <i>Pan troglodytes</i> ADIK         | - | ----- | - |
| <i>Gorilla gorilla</i> ADIK         | - | ----- | - |
| <i>Papio hamadryas</i> ADIK         | - | ----- | - |
| <i>Callithrix jacchus</i> ADIK      | - | ----- | - |
| <i>Rattus norvegicus</i> Adik       | - | ----- | - |
| <i>Cavia porcellus</i> ADIK         | - | ----- | - |
| <i>Equus caballus</i> ADIK          | - | ----- | - |
| <i>Canis lupus familiaris</i> ADIK  | - | ----- | - |
| <i>Dasyopus novemcinctus</i> ADIK   | - | ----- | - |
| <i>Loxodonta africana</i> ADIK      | - | ----- | - |
| <i>Mus musculus</i> Adil            | - | ----- | - |
| <i>Rattus norvegicus</i> Adil       | - | ----- | - |
| <i>Homo sapiens</i> ADIM            | - | ----- | - |
| <i>Pan troglodytes</i> ADIM         | - | ----- | - |

|                                    |    |                                        |    |
|------------------------------------|----|----------------------------------------|----|
| <i>Pongo abelii</i> ADIM           | -  | -----                                  | -  |
| <i>Nomascus leucogenys</i> ADIM    | -  | -----                                  | -  |
| <i>Papio hamadryas</i> ADIM        | -  | -----                                  | -  |
| <i>Callithrix jacchus</i> ADIM     | -  | -----                                  | -  |
| <i>Mus musculus</i> Adim           | -  | -----                                  | -  |
| <i>Rattus norvegicus</i> Adim      | -  | -----                                  | -  |
| <i>Cavia porcellus</i> ADIM        | -  | -----                                  | -  |
| <i>Bos taurus</i> ADIM             | -  | -----                                  | -  |
| <i>Equus caballus</i> ADIM         | -  | -----                                  | -  |
| <i>Canis lupus familiaris</i> ADIM | -  | -----                                  | -  |
| <i>Homo sapiens</i> ADIN           | 20 | TPGPGSSELRSAFSAARTTPLEGTSEMAVTFDKVYVNI | 79 |
| <i>Pan troglodytes</i> ADIN        | 20 | TPGPGSSELRSAFSAARTTPLEGTSEMAVTFDKVYVNI | 79 |
| <i>Pongo abelii</i> ADIN           | 20 | APGPGSSELRSAFSAARTTPLEGTSEMAVTFDKVYVNI | 79 |
| <i>Nomascus leucogenys</i> ADIN    | 20 | ALGPGSSELRSAFSAARTTPLEGTSEMAVTFDKVYVNI | 79 |
| <i>Macaca mulatta</i> ADIN         | 20 | APGPGSSELRSAFSAARTTPLEGASEMAVTFDKVYVNI | 79 |
| <i>Callithrix jacchus</i> ADIN     | 20 | APGPGSSELRSAFSAARTTPLEGTSEMAVTFDKVYVNI | 79 |
| <i>Mus musculus</i> Adin           | 20 | A-GPGSSELRSAFSAARTTPLEGTSEMAVTFDKVYVNI | 78 |
| <i>Cavia porcellus</i> ADIN        | 31 | APGPDSTGLRSAFSAVRTTPLEGTSEMAVTFDKVLVNI | 90 |
| <i>Tursiops truncatus</i> ADIN     | 20 | ALG--STELRSAFSAARITPLEGTSEMAVTFDKVYVNI | 77 |
| <i>Canis lupus familiaris</i> ADIN | 20 | APG--SAELRSAFSAARTTPLEGTSEMAVTFDKVYVNI | 77 |
| <i>Dasyopus novemcinctus</i> ADIN  | 20 | APG--SSELRSAFSAARTSSLEGTSEMAVTFDKVFNIG | 77 |
| <i>Loxodonta africana</i> ADIN     | 20 | APG--SSELRSAFSAARTSPLEGTSEMAVTFDKVYVNI | 77 |
| <i>Homo sapiens</i> ADIO           | -  | -----                                  | -  |
| <i>Pan troglodytes</i> ADIO        | -  | -----                                  | -  |
| <i>Macaca mulatta</i> ADIO         | -  | -----                                  | -  |
| <i>Bos taurus</i> ADIO             | -  | -----                                  | -  |
| <i>Myotis lucifugus</i> ADIO       | -  | -----                                  | -  |
| <i>Homo sapiens</i> ADIP           | -  | -----                                  | -  |
| <i>Otolemur garnettii</i> ADIP     | -  | -----                                  | -  |
| <i>Mus musculus</i> Adip           | -  | -----                                  | -  |
| <i>Cavia porcellus</i> ADIP        | -  | -----                                  | -  |
| <i>Bos taurus</i> ADIP             | -  | -----                                  | -  |
| <i>Equus caballus</i> ADIP         | -  | -----                                  | -  |
| <i>Loxodonta africana</i> ADIP     | -  | -----                                  | -  |
| <i>Homo sapiens</i> ADIQ           | -  | -----                                  | -  |
| <i>Pan troglodytes</i> ADIQ        | -  | -----                                  | -  |
| <i>Pongo abelii</i> ADIQ           | -  | -----                                  | -  |
| <i>Nomascus leucogenys</i> ADIQ    | -  | -----                                  | -  |
| <i>Macaca mulatta</i> ADIQ         | -  | -----                                  | -  |
| <i>Mus musculus</i> Adiq           | -  | -----                                  | -  |
| <i>Rattus norvegicus</i> Adiq      | -  | -----                                  | -  |
| <i>Homo sapiens</i> ADIR           | -  | -----                                  | -  |
| <i>Pan troglodytes</i> ADIR        | -  | -----                                  | -  |
| <i>Pongo abelii</i> ADIR           | -  | -----                                  | -  |
| <i>Nomascus leucogenys</i> ADIR    | -  | -----                                  | -  |
| <i>Macaca mulatta</i> ADIR         | -  | -----                                  | -  |
| <i>Papio hamadryas</i> ADIR        | -  | -----                                  | -  |
| <i>Callithrix jacchus</i> ADIR     | -  | -----                                  | -  |
| <i>Tarsius syrichta</i> ADIR       | -  | -----                                  | -  |
| <i>Otolemur garnettii</i> ADIR     | -  | -----                                  | -  |
| <i>Tupaia belangeri</i> ADIR       | -  | -----                                  | -  |
| <i>Mus musculus</i> Adir           | -  | -----                                  | -  |
| <i>Rattus norvegicus</i> Adir      | -  | -----                                  | -  |
| <i>Cavia porcellus</i> ADIR        | -  | -----                                  | -  |
| <i>Oryctolagus cuniculus</i> ADIR  | -  | -----                                  | -  |
| <i>Tursiops truncatus</i> ADIR     | -  | -----                                  | -  |
| <i>Bos taurus</i> ADIR             | -  | -----                                  | -  |
| <i>Equus caballus</i> ADIR         | -  | -----                                  | -  |
| <i>Canis lupus familiaris</i> ADIR | -  | -----                                  | -  |
| <i>Myotis lucifugus</i> ADIR       | -  | -----                                  | -  |
| <i>Pteropus vampyrus</i> ADIR      | -  | -----                                  | -  |
| <i>Erinaceus europaeus</i> ADIR    | -  | -----                                  | -  |
| <i>Dasyopus novemcinctus</i> ADIR  | -  | -----                                  | -  |
| <i>Choloepus hoffmanni</i> ADIR    | -  | -----                                  | -  |
| <i>Loxodonta africana</i> ADIR     | -  | -----                                  | -  |

|                                    | 550 | 560 | 570 | 580 | 590 | 600 |
|------------------------------------|-----|-----|-----|-----|-----|-----|
| <i>Homo sapiens</i> ADIA           |     |     |     |     |     |     |
| <i>Homo sapiens</i> ADIA           |     |     |     |     |     |     |
| <i>Papio hamadryas</i> ADIA        |     |     |     |     |     |     |
| <i>Mus musculus</i> Adia           |     |     |     |     |     |     |
| <i>Rattus norvegicus</i> Adia      |     |     |     |     |     |     |
| <i>Cavia porcellus</i> ADIA        |     |     |     |     |     |     |
| <i>Ochotona princeps</i> ADIA      |     |     |     |     |     |     |
| <i>Bos taurus</i> ADIA             |     |     |     |     |     |     |
| <i>Equus caballus</i> ADIA         |     |     |     |     |     |     |
| <i>Canis lupus familiaris</i> ADIA |     |     |     |     |     |     |
| <i>Felis catus</i> ADIA            |     |     |     |     |     |     |
| <i>Myotis lucifugus</i> ADIA       |     |     |     |     |     |     |
| <i>Dasyopus novemcinctus</i> ADIA  |     |     |     |     |     |     |
| <i>Loxodonta africana</i> ADIA     |     |     |     |     |     |     |
| <i>Homo sapiens</i> ADIB           |     |     |     |     |     |     |
| <i>Pan troglodytes</i> ADIB        |     |     |     |     |     |     |
| <i>Pongo abelii</i> ADIB           |     |     |     |     |     |     |
| <i>Nomascus leucogenys</i> ADIB    |     |     |     |     |     |     |
| <i>Callithrix jacchus</i> ADIB     |     |     |     |     |     |     |
| <i>Otolemur garnettii</i> ADIB     |     |     |     |     |     |     |
| <i>Mus musculus</i> Adib           |     |     |     |     |     |     |
| <i>Rattus norvegicus</i> Adib      |     |     |     |     |     |     |
| <i>Cavia porcellus</i> ADIB        |     |     |     |     |     |     |
| <i>Oryctolagus cuniculus</i> ADIB  |     |     |     |     |     |     |
| <i>Bos taurus</i> ADIB             |     |     |     |     |     |     |
| <i>Equus caballus</i> ADIB         |     |     |     |     |     |     |
| <i>Canis lupus familiaris</i> ADIB |     |     |     |     |     |     |
| <i>Myotis lucifugus</i> ADIB       |     |     |     |     |     |     |
| <i>Loxodonta africana</i> ADIB     |     |     |     |     |     |     |
| <i>Homo sapiens</i> ADIC           |     |     |     |     |     |     |
| <i>Macaca mulatta</i> ADIC         |     |     |     |     |     |     |
| <i>Papio hamadryas</i> ADIC        |     |     |     |     |     |     |
| <i>Callithrix jacchus</i> ADIC     |     |     |     |     |     |     |
| <i>Mus musculus</i> Adic           |     |     |     |     |     |     |
| <i>Rattus norvegicus</i> Adic      |     |     |     |     |     |     |
| <i>Cavia porcellus</i> ADIC        |     |     |     |     |     |     |
| <i>Oryctolagus cuniculus</i> ADIC  |     |     |     |     |     |     |
| <i>Equus caballus</i> ADIC         |     |     |     |     |     |     |
| <i>Canis lupus familiaris</i> ADIC |     |     |     |     |     |     |
| <i>Myotis lucifugus</i> ADIC       |     |     |     |     |     |     |
| <i>Loxodonta africana</i> ADIC     |     |     |     |     |     |     |
| <i>Homo sapiens</i> ADID           |     |     |     |     |     |     |
| <i>Pan troglodytes</i> ADID        |     |     |     |     |     |     |
| <i>Pongo abelii</i> ADID           |     |     |     |     |     |     |
| <i>Nomascus leucogenys</i> ADID    |     |     |     |     |     |     |
| <i>Macaca mulatta</i> ADID         |     |     |     |     |     |     |
| <i>Otolemur garnettii</i> ADID     |     |     |     |     |     |     |
| <i>Mus musculus</i> Adid           |     |     |     |     |     |     |
| <i>Rattus norvegicus</i> Adid      |     |     |     |     |     |     |
| <i>Cavia porcellus</i> ADID        |     |     |     |     |     |     |
| <i>Oryctolagus cuniculus</i> ADID  |     |     |     |     |     |     |
| <i>Bos taurus</i> ADID             |     |     |     |     |     |     |
| <i>Equus caballus</i> ADID         |     |     |     |     |     |     |
| <i>Canis lupus familiaris</i> ADID |     |     |     |     |     |     |
| <i>Felis catus</i> ADID            |     |     |     |     |     |     |
| <i>Myotis lucifugus</i> ADID       |     |     |     |     |     |     |
| <i>Dasyopus novemcinctus</i> ADID  |     |     |     |     |     |     |
| <i>Loxodonta africana</i> ADID     |     |     |     |     |     |     |
| <i>Homo sapiens</i> ADIE           |     |     |     |     |     |     |
| <i>Pan troglodytes</i> ADIE        |     |     |     |     |     |     |
| <i>Pongo abelii</i> ADIE           |     |     |     |     |     |     |
| <i>Papio hamadryas</i> ADIE        |     |     |     |     |     |     |
| <i>Callithrix jacchus</i> ADIE     |     |     |     |     |     |     |
| <i>Otolemur garnettii</i> ADIE     |     |     |     |     |     |     |
| <i>Mus musculus</i> Adie           |     |     |     |     |     |     |
| <i>Rattus norvegicus</i> Adie      |     |     |     |     |     |     |
| <i>Homo sapiens</i> ADIF1          |     |     |     |     |     |     |
| <i>Homo sapiens</i> ADIF2          |     |     |     |     |     |     |
| <i>Pan troglodytes</i> ADIF1       |     |     |     |     |     |     |
| <i>Pongo abelii</i> ADIF1          |     |     |     |     |     |     |
| <i>Nomascus leucogenys</i> ADIF1   |     |     |     |     |     |     |
| <i>Macaca mulatta</i> ADIF1        |     |     |     |     |     |     |
| <i>Papio hamadryas</i> ADIF1       |     |     |     |     |     |     |

|                                     |   |       |   |
|-------------------------------------|---|-------|---|
| <i>Microcebus murinus</i> ADIF1     | - | ----- | - |
| <i>Otolemur garnettii</i> ADIF1     | - | ----- | - |
| <i>Mus musculus</i> Adif1           | - | ----- | - |
| <i>Rattus norvegicus</i> Adif1      | - | ----- | - |
| <i>Cavia porcellus</i> ADIF1        | - | ----- | - |
| <i>Oryctolagus cuniculus</i> ADIF1  | - | ----- | - |
| <i>Ochotona princeps</i> ADIF1      | - | ----- | - |
| <i>Bos taurus</i> ADIF1             | - | ----- | - |
| <i>Equus caballus</i> ADIF1         | - | ----- | - |
| <i>Canis lupus familiaris</i> ADIF1 | - | ----- | - |
| <i>Felis catus</i> ADIF1            | - | ----- | - |
| <i>Dasyopus novemcinctus</i> ADIF1  | - | ----- | - |
| <i>Loxodonta africana</i> ADIF1     | - | ----- | - |
| <i>Homo sapiens</i> ADIG            | - | ----- | - |
| <i>Pan troglodytes</i> ADIG         | - | ----- | - |
| <i>Pongo abelii</i> ADIG            | - | ----- | - |
| <i>Callithrix jacchus</i> ADIG      | - | ----- | - |
| <i>Otolemur garnettii</i> ADIG      | - | ----- | - |
| <i>Mus musculus</i> Adig            | - | ----- | - |
| <i>Rattus norvegicus</i> Adig       | - | ----- | - |
| <i>Cavia porcellus</i> ADIG         | - | ----- | - |
| <i>Oryctolagus cuniculus</i> ADIG   | - | ----- | - |
| <i>Tursiops truncatus</i> ADIG      | - | ----- | - |
| <i>Bos taurus</i> ADIG              | - | ----- | - |
| <i>Equus caballus</i> ADIG          | - | ----- | - |
| <i>Canis lupus familiaris</i> ADIG  | - | ----- | - |
| <i>Myotis lucifugus</i> ADIG        | - | ----- | - |
| <i>Homo sapiens</i> ADIH            | - | ----- | - |
| <i>Pan troglodytes</i> ADIH         | - | ----- | - |
| <i>Pongo abelii</i> ADIH            | - | ----- | - |
| <i>Nomascus leucogenys</i> ADIH     | - | ----- | - |
| <i>Macaca mulatta</i> ADIH          | - | ----- | - |
| <i>Papio hamadryas</i> ADIH         | - | ----- | - |
| <i>Mus musculus</i> Adih            | - | ----- | - |
| <i>Rattus norvegicus</i> Adih       | - | ----- | - |
| <i>Dipodomys ordii</i> ADIH         | - | ----- | - |
| <i>Cavia porcellus</i> ADIH         | - | ----- | - |
| <i>Bos taurus</i> ADIH              | - | ----- | - |
| <i>Equus caballus</i> ADIH          | - | ----- | - |
| <i>Canis lupus familiaris</i> ADIH  | - | ----- | - |
| <i>Pteropus vampyrus</i> ADIH       | - | ----- | - |
| <i>Loxodonta africana</i> ADIH      | - | ----- | - |
| <i>Homo sapiens</i> ADII            | - | ----- | - |
| <i>Pongo abelii</i> ADII            | - | ----- | - |
| <i>Macaca mulatta</i> ADII          | - | ----- | - |
| <i>Mus musculus</i> Adii            | - | ----- | - |
| <i>Rattus norvegicus</i> Adii       | - | ----- | - |
| <i>Bos taurus</i> ADII              | - | ----- | - |
| <i>Canis lupus familiaris</i> ADII  | - | ----- | - |
| <i>Dasyopus novemcinctus</i> ADII   | - | ----- | - |
| <i>Homo sapiens</i> ADIJ            | - | ----- | - |
| <i>Pan troglodytes</i> ADIJ         | - | ----- | - |
| <i>Papio hamadryas</i> ADIJ         | - | ----- | - |
| <i>Mus musculus</i> Adij            | - | ----- | - |
| <i>Rattus norvegicus</i> Adij       | - | ----- | - |
| <i>Oryctolagus cuniculus</i> ADIJ   | - | ----- | - |
| <i>Bos taurus</i> ADIJ              | - | ----- | - |
| <i>Canis lupus familiaris</i> ADIJ  | - | ----- | - |
| <i>Loxodonta africana</i> ADIJ      | - | ----- | - |
| <i>Homo sapiens</i> ADIK            | - | ----- | - |
| <i>Pan troglodytes</i> ADIK         | - | ----- | - |
| <i>Gorilla gorilla</i> ADIK         | - | ----- | - |
| <i>Papio hamadryas</i> ADIK         | - | ----- | - |
| <i>Callithrix jacchus</i> ADIK      | - | ----- | - |
| <i>Rattus norvegicus</i> Adik       | - | ----- | - |
| <i>Cavia porcellus</i> ADIK         | - | ----- | - |
| <i>Equus caballus</i> ADIK          | - | ----- | - |
| <i>Canis lupus familiaris</i> ADIK  | - | ----- | - |
| <i>Dasyopus novemcinctus</i> ADIK   | - | ----- | - |
| <i>Loxodonta africana</i> ADIK      | - | ----- | - |
| <i>Mus musculus</i> Adil            | - | ----- | - |
| <i>Rattus norvegicus</i> Adil       | - | ----- | - |
| <i>Homo sapiens</i> ADIM            | - | ----- | - |
| <i>Pan troglodytes</i> ADIM         | - | ----- | - |

|                                    |    |                                                               |     |
|------------------------------------|----|---------------------------------------------------------------|-----|
| <i>Pongo abelii</i> ADIM           | -  | -----                                                         | -   |
| <i>Nomascus leucogenys</i> ADIM    | -  | -----                                                         | -   |
| <i>Papio hamadryas</i> ADIM        | -  | -----                                                         | -   |
| <i>Callithrix jacchus</i> ADIM     | -  | -----                                                         | -   |
| <i>Mus musculus</i> Adim           | -  | -----                                                         | -   |
| <i>Rattus norvegicus</i> Adim      | -  | -----                                                         | -   |
| <i>Cavia porcellus</i> ADIM        | -  | -----                                                         | -   |
| <i>Bos taurus</i> ADIM             | -  | -----                                                         | -   |
| <i>Equus caballus</i> ADIM         | -  | -----                                                         | -   |
| <i>Canis lupus familiaris</i> ADIM | -  | -----                                                         | -   |
| <i>Homo sapiens</i> ADIN           | 80 | FTAGKAPHKSLSVMLVRNRDEVQALAFDEQRRPGARRAASQSAMLQLDYGDTVWLRRLHGA | 139 |
| <i>Pan troglodytes</i> ADIN        | 80 | FTAGKAPHKSLSVMLVRNRDEVQALAFDEQRRPGARRAASQSAMLQLDYGDTVWLRRLHGA | 139 |
| <i>Pongo abelii</i> ADIN           | 80 | FTAGKAPHKSLSVMLVRNRDEVQALAFDEQRRPGARRAASQSAMLQLDYGDTVWLRRLHGA | 139 |
| <i>Nomascus leucogenys</i> ADIN    | 80 | FTAGKAPHKSLSVMLVRNRDEVQALAFDEQRRPGARRAASQSAMLQLDYGDTVWLRRLHGA | 139 |
| <i>Macaca mulatta</i> ADIN         | 80 | FTVGKAPHKSLSVMLVRNHDEVQALAFDEQRRPSARRAASQSAMLQLDYGDTVWLRRLHGS | 139 |
| <i>Callithrix jacchus</i> ADIN     | 80 | FTAGKAPHKSLSVMLVRNRDEVQALAFDEQRRPSARRAASQSAMLQLDYGDTVWLRRLHGA | 139 |
| <i>Mus musculus</i> Adin           | 79 | FTAGKAPHKSLSVMLVRNRDEVQALAFDEQRRPGARRAASQSAMLQLDYGDTVWLRRLHGA | 138 |
| <i>Cavia porcellus</i> ADIN        | 91 | FTAGKAPHKSLSVMLVRNRDEVQALAFDEQRRPGTRRAASQSAMLQLDYGDTVWLRRLHGA | 150 |
| <i>Tursiops truncatus</i> ADIN     | 78 | FTAGKAPHKSLSVMLVRNRDEVQALAFDEQRRPATRHAASQSAMLQLDYGDTVWLRRLHGA | 137 |
| <i>Canis lupus familiaris</i> ADIN | 78 | FTAGKAPHKSLSVMLVRNRDEVQALAFDEQRRPGARRAASQSAMLQLDYGDTVWLRRLHGA | 137 |
| <i>Dasypus novemcinctus</i> ADIN   | 78 | FTAGKAPHKSLSVMLVRNSDEVQTLAFDEQRRPGARRAASQSAMLQLDYGDTVWLRRLHGA | 137 |
| <i>Loxodonta africana</i> ADIN     | 78 | FTAGKAPHKSLSVMLVRNRNEVQALAFDEQRRPGARRAASQSAMLQLDYGDTVWLRRLHGA | 137 |
| <i>Homo sapiens</i> ADIO           | -  | -----                                                         | -   |
| <i>Pan troglodytes</i> ADIO        | -  | -----                                                         | -   |
| <i>Macaca mulatta</i> ADIO         | -  | -----                                                         | -   |
| <i>Bos taurus</i> ADIO             | -  | -----                                                         | -   |
| <i>Myotis lucifugus</i> ADIO       | -  | -----                                                         | -   |
| <i>Homo sapiens</i> ADIP           | -  | -----                                                         | -   |
| <i>Otolemur garnettii</i> ADIP     | -  | -----                                                         | -   |
| <i>Mus musculus</i> Adip           | -  | -----                                                         | -   |
| <i>Cavia porcellus</i> ADIP        | -  | -----                                                         | -   |
| <i>Bos taurus</i> ADIP             | -  | -----                                                         | -   |
| <i>Equus caballus</i> ADIP         | -  | -----                                                         | -   |
| <i>Loxodonta africana</i> ADIP     | -  | -----                                                         | -   |
| <i>Homo sapiens</i> ADIQ           | -  | -----                                                         | -   |
| <i>Pan troglodytes</i> ADIQ        | -  | -----                                                         | -   |
| <i>Pongo abelii</i> ADIQ           | -  | -----                                                         | -   |
| <i>Nomascus leucogenys</i> ADIQ    | -  | -----                                                         | -   |
| <i>Macaca mulatta</i> ADIQ         | -  | -----                                                         | -   |
| <i>Mus musculus</i> Adiq           | -  | -----                                                         | -   |
| <i>Rattus norvegicus</i> Adiq      | -  | -----                                                         | -   |
| <i>Homo sapiens</i> ADIR           | -  | -----                                                         | -   |
| <i>Pan troglodytes</i> ADIR        | -  | -----                                                         | -   |
| <i>Pongo abelii</i> ADIR           | -  | -----                                                         | -   |
| <i>Nomascus leucogenys</i> ADIR    | -  | -----                                                         | -   |
| <i>Macaca mulatta</i> ADIR         | -  | -----                                                         | -   |
| <i>Papio hamadryas</i> ADIR        | -  | -----                                                         | -   |
| <i>Callithrix jacchus</i> ADIR     | -  | -----                                                         | -   |
| <i>Tarsius syrichta</i> ADIR       | -  | -----                                                         | -   |
| <i>Otolemur garnettii</i> ADIR     | -  | -----                                                         | -   |
| <i>Tupaia belangeri</i> ADIR       | -  | -----                                                         | -   |
| <i>Mus musculus</i> Adir           | -  | -----                                                         | -   |
| <i>Rattus norvegicus</i> Adir      | -  | -----                                                         | -   |
| <i>Cavia porcellus</i> ADIR        | -  | -----                                                         | -   |
| <i>Oryctolagus cuniculus</i> ADIR  | -  | -----                                                         | -   |
| <i>Tursiops truncatus</i> ADIR     | -  | -----                                                         | -   |
| <i>Bos taurus</i> ADIR             | -  | -----                                                         | -   |
| <i>Equus caballus</i> ADIR         | -  | -----                                                         | -   |
| <i>Canis lupus familiaris</i> ADIR | -  | -----                                                         | -   |
| <i>Myotis lucifugus</i> ADIR       | -  | -----                                                         | -   |
| <i>Pteropus vampyrus</i> ADIR      | -  | -----                                                         | -   |
| <i>Erinaceus europaeus</i> ADIR    | -  | -----                                                         | -   |
| <i>Dasypus novemcinctus</i> ADIR   | -  | -----                                                         | -   |
| <i>Choloepus hoffmanni</i> ADIR    | -  | -----                                                         | -   |
| <i>Loxodonta africana</i> ADIR     | -  | -----                                                         | -   |

| <i>Homo sapiens</i> ADIA           | 610 | 620 | 630 | 640 | 650 | 660 |
|------------------------------------|-----|-----|-----|-----|-----|-----|
| <i>Homo sapiens</i> ADIA           |     |     |     |     |     |     |
| <i>Papio hamadryas</i> ADIA        |     |     |     |     |     |     |
| <i>Mus musculus</i> Adia           |     |     |     |     |     |     |
| <i>Rattus norvegicus</i> Adia      |     |     |     |     |     |     |
| <i>Cavia porcellus</i> ADIA        |     |     |     |     |     |     |
| <i>Ochotona princeps</i> ADIA      |     |     |     |     |     |     |
| <i>Bos taurus</i> ADIA             |     |     |     |     |     |     |
| <i>Equus caballus</i> ADIA         |     |     |     |     |     |     |
| <i>Canis lupus familiaris</i> ADIA |     |     |     |     |     |     |
| <i>Felis catus</i> ADIA            |     |     |     |     |     |     |
| <i>Myotis lucifugus</i> ADIA       |     |     |     |     |     |     |
| <i>Dasyopus novemcinctus</i> ADIA  |     |     |     |     |     |     |
| <i>Loxodonta africana</i> ADIA     |     |     |     |     |     |     |
| <i>Homo sapiens</i> ADIB           |     |     |     |     |     |     |
| <i>Pan troglodytes</i> ADIB        |     |     |     |     |     |     |
| <i>Pongo abelii</i> ADIB           |     |     |     |     |     |     |
| <i>Nomascus leucogenys</i> ADIB    |     |     |     |     |     |     |
| <i>Callithrix jacchus</i> ADIB     |     |     |     |     |     |     |
| <i>Otolemur garnettii</i> ADIB     |     |     |     |     |     |     |
| <i>Mus musculus</i> Adib           |     |     |     |     |     |     |
| <i>Rattus norvegicus</i> Adib      |     |     |     |     |     |     |
| <i>Cavia porcellus</i> ADIB        |     |     |     |     |     |     |
| <i>Oryctolagus cuniculus</i> ADIB  |     |     |     |     |     |     |
| <i>Bos taurus</i> ADIB             |     |     |     |     |     |     |
| <i>Equus caballus</i> ADIB         |     |     |     |     |     |     |
| <i>Canis lupus familiaris</i> ADIB |     |     |     |     |     |     |
| <i>Myotis lucifugus</i> ADIB       |     |     |     |     |     |     |
| <i>Loxodonta africana</i> ADIB     |     |     |     |     |     |     |
| <i>Homo sapiens</i> ADIC           |     |     |     |     |     |     |
| <i>Macaca mulatta</i> ADIC         |     |     |     |     |     |     |
| <i>Papio hamadryas</i> ADIC        |     |     |     |     |     |     |
| <i>Callithrix jacchus</i> ADIC     |     |     |     |     |     |     |
| <i>Mus musculus</i> Adic           |     |     |     |     |     |     |
| <i>Rattus norvegicus</i> Adic      |     |     |     |     |     |     |
| <i>Cavia porcellus</i> ADIC        |     |     |     |     |     |     |
| <i>Oryctolagus cuniculus</i> ADIC  |     |     |     |     |     |     |
| <i>Equus caballus</i> ADIC         |     |     |     |     |     |     |
| <i>Canis lupus familiaris</i> ADIC |     |     |     |     |     |     |
| <i>Myotis lucifugus</i> ADIC       |     |     |     |     |     |     |
| <i>Loxodonta africana</i> ADIC     |     |     |     |     |     |     |
| <i>Homo sapiens</i> ADID           |     |     |     |     |     |     |
| <i>Pan troglodytes</i> ADID        |     |     |     |     |     |     |
| <i>Pongo abelii</i> ADID           |     |     |     |     |     |     |
| <i>Nomascus leucogenys</i> ADID    |     |     |     |     |     |     |
| <i>Macaca mulatta</i> ADID         |     |     |     |     |     |     |
| <i>Otolemur garnettii</i> ADID     |     |     |     |     |     |     |
| <i>Mus musculus</i> Adid           |     |     |     |     |     |     |
| <i>Rattus norvegicus</i> Adid      |     |     |     |     |     |     |
| <i>Cavia porcellus</i> ADID        |     |     |     |     |     |     |
| <i>Oryctolagus cuniculus</i> ADID  |     |     |     |     |     |     |
| <i>Bos taurus</i> ADID             |     |     |     |     |     |     |
| <i>Equus caballus</i> ADID         |     |     |     |     |     |     |
| <i>Canis lupus familiaris</i> ADID |     |     |     |     |     |     |
| <i>Felis catus</i> ADID            |     |     |     |     |     |     |
| <i>Myotis lucifugus</i> ADID       |     |     |     |     |     |     |
| <i>Dasyopus novemcinctus</i> ADID  |     |     |     |     |     |     |
| <i>Loxodonta africana</i> ADID     |     |     |     |     |     |     |
| <i>Homo sapiens</i> ADIE           |     |     |     |     |     |     |
| <i>Pan troglodytes</i> ADIE        |     |     |     |     |     |     |
| <i>Pongo abelii</i> ADIE           |     |     |     |     |     |     |
| <i>Papio hamadryas</i> ADIE        |     |     |     |     |     |     |
| <i>Callithrix jacchus</i> ADIE     |     |     |     |     |     |     |
| <i>Otolemur garnettii</i> ADIE     |     |     |     |     |     |     |
| <i>Mus musculus</i> Adie           |     |     |     |     |     |     |
| <i>Rattus norvegicus</i> Adie      |     |     |     |     |     |     |
| <i>Homo sapiens</i> ADIF1          |     |     |     |     |     |     |
| <i>Homo sapiens</i> ADIF2          |     |     |     |     |     |     |
| <i>Pan troglodytes</i> ADIF1       |     |     |     |     |     |     |
| <i>Pongo abelii</i> ADIF1          |     |     |     |     |     |     |
| <i>Nomascus leucogenys</i> ADIF1   |     |     |     |     |     |     |
| <i>Macaca mulatta</i> ADIF1        |     |     |     |     |     |     |
| <i>Papio hamadryas</i> ADIF1       |     |     |     |     |     |     |

|                                     |     |                                       |     |
|-------------------------------------|-----|---------------------------------------|-----|
| <i>Microcebus murinus</i> ADIF1     | -   | -----                                 | -   |
| <i>Otolemur garnettii</i> ADIF1     | -   | -----                                 | -   |
| <i>Mus musculus</i> Adif1           | -   | -----                                 | -   |
| <i>Rattus norvegicus</i> Adif1      | -   | -----                                 | -   |
| <i>Cavia porcellus</i> ADIF1        | -   | -----                                 | -   |
| <i>Oryctolagus cuniculus</i> ADIF1  | -   | -----                                 | -   |
| <i>Ochotona princeps</i> ADIF1      | -   | -----                                 | -   |
| <i>Bos taurus</i> ADIF1             | -   | -----                                 | -   |
| <i>Equus caballus</i> ADIF1         | -   | -----                                 | -   |
| <i>Canis lupus familiaris</i> ADIF1 | -   | -----                                 | -   |
| <i>Felis catus</i> ADIF1            | -   | -----                                 | -   |
| <i>Dasyopus novemcinctus</i> ADIF1  | -   | -----                                 | -   |
| <i>Loxodonta africana</i> ADIF1     | -   | -----                                 | -   |
| <i>Homo sapiens</i> ADIG            | -   | -----                                 | -   |
| <i>Pan troglodytes</i> ADIG         | -   | -----                                 | -   |
| <i>Pongo abelii</i> ADIG            | -   | -----                                 | -   |
| <i>Callithrix jacchus</i> ADIG      | -   | -----                                 | -   |
| <i>Otolemur garnettii</i> ADIG      | -   | -----                                 | -   |
| <i>Mus musculus</i> Adig            | -   | -----                                 | -   |
| <i>Rattus norvegicus</i> Adig       | -   | -----                                 | -   |
| <i>Cavia porcellus</i> ADIG         | -   | -----                                 | -   |
| <i>Oryctolagus cuniculus</i> ADIG   | -   | -----                                 | -   |
| <i>Tursiops truncatus</i> ADIG      | -   | -----                                 | -   |
| <i>Bos taurus</i> ADIG              | -   | -----                                 | -   |
| <i>Equus caballus</i> ADIG          | -   | -----                                 | -   |
| <i>Canis lupus familiaris</i> ADIG  | -   | -----                                 | -   |
| <i>Myotis lucifugus</i> ADIG        | -   | -----                                 | -   |
| <i>Homo sapiens</i> ADIH            | -   | -----                                 | -   |
| <i>Pan troglodytes</i> ADIH         | -   | -----                                 | -   |
| <i>Pongo abelii</i> ADIH            | -   | -----                                 | -   |
| <i>Nomascus leucogenys</i> ADIH     | -   | -----                                 | -   |
| <i>Macaca mulatta</i> ADIH          | -   | -----                                 | -   |
| <i>Papio hamadryas</i> ADIH         | -   | -----                                 | -   |
| <i>Mus musculus</i> Adih            | -   | -----                                 | -   |
| <i>Rattus norvegicus</i> Adih       | -   | -----                                 | -   |
| <i>Dipodomys ordii</i> ADIH         | -   | -----                                 | -   |
| <i>Cavia porcellus</i> ADIH         | -   | -----                                 | -   |
| <i>Bos taurus</i> ADIH              | -   | -----                                 | -   |
| <i>Equus caballus</i> ADIH          | -   | -----                                 | -   |
| <i>Canis lupus familiaris</i> ADIH  | -   | -----                                 | -   |
| <i>Pteropus vampyrus</i> ADIH       | -   | -----                                 | -   |
| <i>Loxodonta africana</i> ADIH      | -   | -----                                 | -   |
| <i>Homo sapiens</i> ADII            | 121 | -----LTAGTASGVGVVGGGAGVGGDSEGEVTSALS  | 151 |
| <i>Pongo abelii</i> ADII            | 121 | -----LTAGTASGVGVVGGGAGVGGDSEGEVTSALS  | 151 |
| <i>Macaca mulatta</i> ADII          | 121 | -----LTAGTAGGVGVVGGGAGGAGDSEGEVTSALS  | 151 |
| <i>Mus musculus</i> Adii            | 121 | -----LT TSAAGGVGVVSGGTGGGGDTEGEVTSALS | 151 |
| <i>Rattus norvegicus</i> Adii       | 121 | -----LT TSAAGGVGVVSGGTGGGGDTEGEVTSALS | 151 |
| <i>Bos taurus</i> ADII              | 121 | -----LTAGAAGGVGVVGGGTGGGGDSEGEVTGALS  | 151 |
| <i>Canis lupus familiaris</i> ADII  | 121 | -----LAAGAAGGVGVVAGGGAGGGDSEGEVTGALS  | 151 |
| <i>Dasyopus novemcinctus</i> ADII   | 121 | -----LTAGAAGGVGVVAGGGAPGGGDSEGEVTGALG | 151 |
| <i>Homo sapiens</i> ADIJ            | 112 | -----AAGAIS                           | 117 |
| <i>Pan troglodytes</i> ADIJ         | 112 | -----AAGAIS                           | 117 |
| <i>Papio hamadryas</i> ADIJ         | 112 | -----AAGAIS                           | 117 |
| <i>Mus musculus</i> Adij            | 112 | -----AAGAIS                           | 117 |
| <i>Rattus norvegicus</i> Adij       | 112 | -----AAGAIS                           | 117 |
| <i>Oryctolagus cuniculus</i> ADIJ   | 112 | -----AAGAIS                           | 117 |
| <i>Bos taurus</i> ADIJ              | 112 | -----AAGAIS                           | 117 |
| <i>Canis lupus familiaris</i> ADIJ  | 112 | -----AAGAIS                           | 117 |
| <i>Loxodonta africana</i> ADIJ      | 112 | -----AAGAIS                           | 117 |
| <i>Homo sapiens</i> ADIK            | 97  | -----PGGVAP-                          | 102 |
| <i>Pan troglodytes</i> ADIK         | 97  | -----PGGVAP-                          | 102 |
| <i>Gorilla gorilla</i> ADIK         | 97  | -----PGGVAP-                          | 102 |
| <i>Papio hamadryas</i> ADIK         | 97  | -----PGGVAP-                          | 102 |
| <i>Callithrix jacchus</i> ADIK      | 97  | -----PGGVAP-                          | 102 |
| <i>Rattus norvegicus</i> Adik       | 97  | -----PGGAAP-                          | 102 |
| <i>Cavia porcellus</i> ADIK         | 97  | -----PGGAAP-                          | 102 |
| <i>Equus caballus</i> ADIK          | 97  | -----PGGVAP-                          | 102 |
| <i>Canis lupus familiaris</i> ADIK  | 97  | -----PGGVAP-                          | 102 |
| <i>Dasyopus novemcinctus</i> ADIK   | 97  | -----PGGAAP-                          | 102 |
| <i>Loxodonta africana</i> ADIK      | 97  | -----PGGVAP-                          | 102 |
| <i>Mus musculus</i> Adil            | 118 | -----AIS                              | 120 |
| <i>Rattus norvegicus</i> Adil       | 118 | -----AIS                              | 120 |
| <i>Homo sapiens</i> ADIM            | -   | -----                                 | -   |
| <i>Pan troglodytes</i> ADIM         | -   | -----                                 | -   |



|                                    |     |                                         |     |
|------------------------------------|-----|-----------------------------------------|-----|
| <i>Pongo abelii</i> ADIM           | -   | -----                                   | -   |
| <i>Nomascus leucogenys</i> ADIM    | -   | -----                                   | -   |
| <i>Papio hamadryas</i> ADIM        | -   | -----                                   | -   |
| <i>Callithrix jacchus</i> ADIM     | -   | -----                                   | -   |
| <i>Mus musculus</i> Adim           | -   | -----                                   | -   |
| <i>Rattus norvegicus</i> Adim      | -   | -----                                   | -   |
| <i>Cavia porcellus</i> ADIM        | -   | -----                                   | -   |
| <i>Bos taurus</i> ADIM             | -   | -----                                   | -   |
| <i>Equus caballus</i> ADIM         | -   | -----                                   | -   |
| <i>Canis lupus familiaris</i> ADIM | -   | -----                                   | -   |
| <i>Homo sapiens</i> ADIN           | 140 | PQYALGAPGATFSGYLVYADADA--DAPA-----RGPPA | 171 |
| <i>Pan troglodytes</i> ADIN        | 140 | PQYALGAPGATFSGYLVYADADA--DAPA-----RGPPA | 171 |
| <i>Pongo abelii</i> ADIN           | 140 | PQYALGAPGATFSGYLVYADADA--DAPA-----RGPPA | 171 |
| <i>Nomascus leucogenys</i> ADIN    | 140 | PQYALGAPGATFSGYLVYADADA--DAPA-----      | 166 |
| <i>Macaca mulatta</i> ADIN         | 140 | PQYALGAPGATFSGYLVYADADADADADA-----RGPPA | 173 |
| <i>Callithrix jacchus</i> ADIN     | 140 | PQYALGAPGATFSGYLVYADADA--DAPA-----RGPPA | 171 |
| <i>Mus musculus</i> Adin           | 139 | PQYALGAPGATFSGYLVYADADA--DAPA-----RG-PA | 169 |
| <i>Cavia porcellus</i> ADIN        | 151 | PQYALGSPGATFSGYLVYADADA--PAPA-----PG-PA | 181 |
| <i>Tursiops truncatus</i> ADIN     | 138 | QQYALGAPGATFSGYLVYADAD---APA-----RGPPA  | 167 |
| <i>Canis lupus familiaris</i> ADIN | 138 | PQYALGAPGATFSGYLVYADAD---APA-----RGPPA  | 167 |
| <i>Dasyopus novemcinctus</i> ADIN  | 138 | PQYALGAPGATFSGYLVYADAD---APA-----RGPPA  | 167 |
| <i>Loxodonta africana</i> ADIN     | 138 | PQYALGAPGATFSGYLVYADAD---APA-----RSPOG  | 167 |
| <i>Homo sapiens</i> ADIO           | -   | -----                                   | -   |
| <i>Pan troglodytes</i> ADIO        | -   | -----                                   | -   |
| <i>Macaca mulatta</i> ADIO         | -   | -----                                   | -   |
| <i>Bos taurus</i> ADIO             | -   | -----                                   | -   |
| <i>Myotis lucifugus</i> ADIO       | -   | -----                                   | -   |
| <i>Homo sapiens</i> ADIP           | -   | -----                                   | -   |
| <i>Otolemur garnettii</i> ADIP     | -   | -----                                   | -   |
| <i>Mus musculus</i> Adip           | -   | -----                                   | -   |
| <i>Cavia porcellus</i> ADIP        | -   | -----                                   | -   |
| <i>Bos taurus</i> ADIP             | -   | -----                                   | -   |
| <i>Equus caballus</i> ADIP         | -   | -----                                   | -   |
| <i>Loxodonta africana</i> ADIP     | -   | -----                                   | -   |
| <i>Homo sapiens</i> ADIQ           | -   | -----                                   | -   |
| <i>Pan troglodytes</i> ADIQ        | -   | -----                                   | -   |
| <i>Pongo abelii</i> ADIQ           | -   | -----                                   | -   |
| <i>Nomascus leucogenys</i> ADIQ    | -   | -----                                   | -   |
| <i>Macaca mulatta</i> ADIQ         | -   | -----                                   | -   |
| <i>Mus musculus</i> Adiq           | -   | -----                                   | -   |
| <i>Rattus norvegicus</i> Adiq      | -   | -----                                   | -   |
| <i>Homo sapiens</i> ADIR           | 16  | -----LPVHVYPL                           | 23  |
| <i>Pan troglodytes</i> ADIR        | 16  | -----LPVHVYPL                           | 23  |
| <i>Pongo abelii</i> ADIR           | 16  | -----LPVHVYPL                           | 23  |
| <i>Nomascus leucogenys</i> ADIR    | 16  | -----LPVHVYPL                           | 23  |
| <i>Macaca mulatta</i> ADIR         | 16  | -----LPVHVYPL                           | 23  |
| <i>Papio hamadryas</i> ADIR        | 16  | -----LPVHVYPL                           | 23  |
| <i>Callithrix jacchus</i> ADIR     | 16  | -----LPVHVYPL                           | 23  |
| <i>Tarsius syrichta</i> ADIR       | 16  | -----LPVHVYPL                           | 23  |
| <i>Otolemur garnettii</i> ADIR     | 16  | -----LPVHVYPL                           | 23  |
| <i>Tupaia belangeri</i> ADIR       | 16  | -----LPVHVYPL                           | 23  |
| <i>Mus musculus</i> Adir           | 16  | -----LPVHIYPL                           | 23  |
| <i>Rattus norvegicus</i> Adir      | 16  | -----LPVHVYPL                           | 23  |
| <i>Cavia porcellus</i> ADIR        | 16  | -----LPVHVYPL                           | 23  |
| <i>Oryctolagus cuniculus</i> ADIR  | 16  | -----LPVHVYPL                           | 23  |
| <i>Tursiops truncatus</i> ADIR     | 16  | -----LPVHVYPL                           | 23  |
| <i>Bos taurus</i> ADIR             | 16  | -----LPVHVYPL                           | 23  |
| <i>Equus caballus</i> ADIR         | 16  | -----LPVHVYPL                           | 23  |
| <i>Canis lupus familiaris</i> ADIR | 16  | -----LPVHVYPL                           | 23  |
| <i>Myotis lucifugus</i> ADIR       | 16  | -----LPVHVYPL                           | 23  |
| <i>Pteropus vampyrus</i> ADIR      | 16  | -----LPVHVYPL                           | 23  |
| <i>Erinaceus europaeus</i> ADIR    | -   | -----                                   | -   |
| <i>Dasyopus novemcinctus</i> ADIR  | 16  | -----LPVHVYPL                           | 23  |
| <i>Choloepus hoffmanni</i> ADIR    | 16  | -----LPVHVYPL                           | 23  |
| <i>Loxodonta africana</i> ADIR     | 16  | -----LPVHVYPL                           | 23  |

*Homo sapiens* ADIA 117 ---K---ATQKIAFSATRTINVP----L-RRDQT-IRFDHVIITN-MN-NNYEPRSGKF 160  
670 680 690 700 710 720  
*Homo sapiens* ADIA 117 ---K---ATQKIAFSATRTINVP----L-RRDQT-IRFDHVIITN-MN-NNYEPRSGKF 160  
*Papio hamadryas* ADIA 117 ---K---ATQKIAFSATRTINTP----L-RRDQT-IRFDHVIITN-MN-NNYEPRSGKF 160  
*Mus musculus* Adia 144 ---G---ATQKVAFSAALRTINSPL----L-RPNQV-IREKVIITN-AN-ENYEPRNGKF 187  
*Rattus norvegicus* Adia 115 ---K---ATQKVAFSAALRTVNSA----L-RPNQA-IREKVIITN-VN-DNYEPRSGKF 158  
*Cavia porcellus* ADIA 115 ---K---ATQKVAFSALKTLTSA----V-RAKQA-IRFDSVIITN-VN-KNYEPRSGKF 158  
*Ochotona princeps* ADIA 115 ---K---ATQKIVFSLKKTATP----V-RRDLP-VREHTIITN-EN-NNYESRSGKF 158  
*Bos taurus* ADIA 111 ---K---ATQKIAFSASRTINHH----Q-RQGQP-IRFDHVIITN-AN-ENYQARSSKF 154  
*Equus caballus* ADIA 116 ---K---TTQKIGFSATRTVNIP----L-RKDQV-IRFDHLIITN-VN-DNYQPRSGKF 159  
*Canis lupus familiaris* ADIA 114 ---K---ATQKIAFSAMRTINIP----L-RRDQT-IRFDHVIITN-EN-RNYEPRSGKF 157  
*Felis catus* ADIA 118 ---K---ATQKIAFCAKRTINSA----L-RRDQA-IRFDQVIITN-LN-NNYESRSGKF 161  
*Myotis lucifugus* ADIA 115 ---K---ATQKVAFSALRKINTP----L-RKDQV-IRFDHVIITN-VN-NNYESRSGKF 158  
*Dasyopus novemcinctus* ADIA 112 ---K---ATQKIAFSATRTVTPP----L-RRDQT-IRFDHVIITN-EN-NNYEPRSGKF 155  
*Loxodonta africana* ADIA 115 ---K---ATQKIAFSALRNINVP----L-RRDQA-IRFDHVIITN-EN-NNYEPRSGKF 158  
*Homo sapiens* ADIB 115 ---K---QKFQSVFTVTRQTHQP----P-APNSL-IRENAVLTN-PQ-GDYDTSTGKF 158  
*Pan troglodytes* ADIB 115 ---K---QKFQSVFTVARQTHQP----P-APNSL-IRENAVLTN-PQ-GDYDTSTGKF 158  
*Pongo abelii* ADIB 115 ---K---QKFQSVFTVTRQTHQP----P-APNSL-IRENAVLTN-PQ-GDYDTSTGKF 158  
*Nomascus leucogenys* ADIB 116 ---K---QKFQSVFTVTRQTHQP----P-APNSL-IRENAVLTN-PQ-GDYDTSTGKF 159  
*Callithrix jacchus* ADIB 114 ---K---QKYQSVFTVTRQTSQF----P-AANGL-IRENAVLTN-PQ-GDYDTSTGKF 157  
*Otolemur garnettii* ADIB 113 ---K---QKHQSVFTVTRQTAQY----P-EPNSL-VKENTVITN-PQ-GDYNTGTGKF 156  
*Mus musculus* Adib 146 ---K---QKHQSVFTVTRQTTQY----P-EANAL-VRENSVITN-PQ-GHYNPSTGKF 189  
*Rattus norvegicus* Adib 138 ---K---QKHQSVFTVTRQTAQY----P-AANGL-VKENSATITN-PQ-GDYNTGTGKF 181  
*Cavia porcellus* ADIB 162 ---K---QKHQSVFTVARQTEQH----P-TANGL-VRENAAITN-PQ-GDYDRDSGRF 205  
*Oryctolagus cuniculus* ADIB 168 ---K---QKHQSVFTVTRQTAQF----P-ESNSL-VRENTAITN-PQ-GDYDTSTGKF 211  
*Bos taurus* ADIB 113 ---K---QKHQSVFSTRQTVQF----P-EANSL-VKENTVITN-PQ-GHYDKDSGKF 156  
*Equus caballus* ADIB 133 ---K---QKHQSVFTVTRQTDQY----P-AANSL-VKENTVITN-PQ-GHYDTSTGKF 176  
*Canis lupus familiaris* ADIB 115 ---K---QKHQSVFTVTRQTAQY----P-LANGL-VKENTVITN-PQ-GHYDTSTGKF 158  
*Myotis lucifugus* ADIB 115 ---K---QKHQSVFTVTRQTAEH----P-TSNGL-VKENTVITN-PQ-GDYNTSTGKF 158  
*Loxodonta africana* ADIB 113 ---K---QKHQSVFTVTRQTVQY----P-EPNSL-VKENGVIITN-PQ-GHYDTSTGKF 156  
*Homo sapiens* ADIC 110 ---K---DQPRPAFSAIRRNPP----P-MGGNV-VIFDMVITN-QE-EPYQNHSGRF 151  
*Macaca mulatta* ADIC 110 ---K---DQPRPAFSAIRRNPP----P-MGGNV-VIFDMVITN-QE-EPYQNHSGRF 151  
*Papio hamadryas* ADIC 110 ---K---DQPRPAFSAIRRNPP----P-MGGNV-VIFDMVITN-QE-EPYQNHSGRF 151  
*Callithrix jacchus* ADIC 110 ---R---DQPRPAFSAIRRNPP----P-MGGNV-VIFDVLITN-QE-GPYQNHSGRF 151  
*Mus musculus* Adic 110 ---R---DQPRPAFSAIRRNPP----M-TLGNV-VIFDKVLTN-QE-SPYQNHSGRF 151  
*Rattus norvegicus* Adic 122 ---R---DQPRPAFSAIRRNPP----P-TYGNV-VIFDKVLTN-QE-NPYQNHSGRF 163  
*Cavia porcellus* ADIC 109 ---R---DQPRPAFSAVRNPNQ----P-KRDKV-VIFDTVITN-QE-GPYRNDTGHF 151  
*Oryctolagus cuniculus* ADIC 151 ---R---DQPRPAFSAVRNPNQ----P-SGGNV-VIFDTVITN-QE-EPYQNHSGRF 192  
*Equus caballus* ADIC 143 ---K---DQPRPAFSAVRRNA----P-LDSNM-VIFDEVIITN-QE-GSYDRSSTGHF 184  
*Canis lupus familiaris* ADIC 129 ---R---DQPRPAFSAIRRNPP----P-TGGNV-VIFDTVITN-QE-GPYQNHSGRF 170  
*Myotis lucifugus* ADIC 110 ---N---DQPRPAFSAVRNPNQ----P-TGGNV-VIFDTVITN-EE-GRYQSHSGRF 151  
*Loxodonta africana* ADIC 125 ---K---DQPRPAFSAVRNPNQ----P-MGGNV-VIFDVLITN-QE-GPYQNHSGRF 166  
*Homo sapiens* ADID 139 ---A---YVYRSAFVSGLE--TY----V-TIPNMPIRETKIFYN-QQ-NHYDGSTGKF 181  
*Pan troglodytes* ADID 139 ---A---YVYRSAFVSGLE--TY----I-TVPNMPIRETKIFYN-QQ-NHYDGSTGKF 181  
*Pongo abelii* ADID 108 ---A---YVYRSAFVSGLE--TY----V-TVPNMPIRETKIFYN-QQ-NHYDGSTGKF 150  
*Nomascus leucogenys* ADID 138 ---A---YVYRSAFVSGLE--TY----V-TVPNMPIRETKIFYN-QQ-NHYDGSTGKF 180  
*Macaca mulatta* ADID 137 ---A---YVYRSAFVSGLE--TY----V-TVPNMPIRETKIFYN-QQ-NHYDGSTGKF 179  
*Otolemur garnettii* ADID 108 ---A---YVYRSAFVSGLE--NR----V-TVPNVPIRETKIFYN-QQ-NHYDGSTGKF 150  
*Mus musculus* Adid 122 ---A---YVYRSAFVSGLE--TR----V-TVPNVPIRETKIFYN-QQ-NHYDGSTGKF 164  
*Rattus norvegicus* Adid 108 ---A---YVYRSAFVSGLE--TR----V-TVPNVPIRETKIFYN-QQ-NHYDGSTGKF 150  
*Cavia porcellus* ADID 150 ---A---FYVYRSAFVSGLE--AY----V-TVPNVPIRETKIFYN-QQ-NHYDGSTGKF 192  
*Oryctolagus cuniculus* ADID 118 ---A---YVYRSAFVSGLE--GR----V-TIPNVPIRETKIFYN-QQ-NHYDGSTGKF 160  
*Bos taurus* ADID 103 ---A---YVYRSAFVSGLE--RQ----V-TVPNVPIRETKIFYN-QQ-NHYDGSTGKF 145  
*Equus caballus* ADID 165 ---S---YVYRSAFVSGLE--TR----V-TVPNVPIRETKIFYN-QQ-NHYDGSTGKF 207  
*Canis lupus familiaris* ADID 117 ---A---YVYRSAFVSGLE--SR----I-TVPNVPIRETKIFYN-LQ-NHYDGSTGKF 159  
*Felis catus* ADID 108 ---A---YVYRSAFVSGLE--SR----V-TVPNVPIRETKIFYN-QQ-NHYDVTTGKF 150  
*Myotis lucifugus* ADID 117 ---A---YVYRSAFVSGLE--TR----V-TVPNVPIRETKIFYN-QQ-NHYDSTGKF 159  
*Dasyopus novemcinctus* ADID 107 ---A---YVYRSAFVSGLE--AR----V-TVPNVPIRETKIFYN-QQ-SHYDSTGKF 149  
*Loxodonta africana* ADID 108 ---A---YSYRSAFVSGLE--AR----V-TVPNVPIRETKIFYN-QQ-NHYDGSTGKF 150  
*Homo sapiens* ADIE 99 ---S---VPPRSAFSAKRSESRV----P-PPSDAPLPEFDRVLVN-EQ-GHYDAVTGKF 143  
*Pan troglodytes* ADIE 99 ---S---VPPRSAFSAKRSESRV----P-PPSDAPLPEFDRVLVN-EQ-GHYDAVTGKF 143  
*Pongo abelii* ADIE 99 ---S---VPPRSAFSAKRSESRV----P-PPSDAPLPEFDRVLVN-EQ-GHYDAVTGKF 143  
*Papio hamadryas* ADIE 99 ---S---VPPRSAFSAKRSESRV----P-PPSDAPLPEFDRVLVN-EQ-GHYDAVTGKF 143  
*Callithrix jacchus* ADIE 99 ---S---VPPRSAFSAKRSESRV----P-PPSDAPLPEFDRVLVN-EQ-GHYDAVTGKF 143  
*Otolemur garnettii* ADIE 99 ---S---VPPRSAFSAKRSESRV----P-PLSDAPLPEFDRVLVN-EQ-GHYDAATGKF 143  
*Mus musculus* Adie 99 ---S---VPPRSAFSAKRSESRV----P-PPADTPEFDRVLVN-EQ-GHYDPTTGKF 143  
*Rattus norvegicus* Adie 99 ---S---VPPRSAFSAKRSESRV----P-PPADTPEFDRVLVN-EQ-GHYDATGKF 143  
*Homo sapiens* ADIF1 197 ---L---VLPKSAFTVGLTVLSK----F-PSSDVPKFDKILYN-EF-NHYDTAAGKF 241  
*Homo sapiens* ADIF2 197 ---L---VLPKSAFTVGLTVLSK----F-PSSDVPKFDKILYN-EF-NHYDTAAGKF 241  
*Pan troglodytes* ADIF1 197 ---L---VLPKSAFTVGLTVLSK----F-PSSDVPKFDKILYN-EF-NHYDTAAGKF 241  
*Pongo abelii* ADIF1 197 ---L---VLPKSAFTVGLTVLSK----F-PSSDVPKFDKILYN-EF-NHYDTAAGKF 241  
*Nomascus leucogenys* ADIF1 197 ---L---VLPKSAFTVGLTVLSK----F-PSSDVPKFDKILYN-EF-NHYDTAAGKF 241  
*Macaca mulatta* ADIF1 197 ---L---VLPKSAFTVGLTVLSK----F-PSSDVPKFDKILYN-EF-NHYDTAAGKF 241  
*Papio hamadryas* ADIF1 197 ---L---VLPKSAFTVGLTVLSK----F-PSSDVPKFDKILYN-EF-NHYDTAAGKF 241

|                                     |     |           |                          |                      |                        |                         |     |
|-------------------------------------|-----|-----------|--------------------------|----------------------|------------------------|-------------------------|-----|
| <i>Microcebus murinus</i> ADIF1     | 197 | ----      | P---                     | ALPKSAFTVGLTVLSK---- | F-PSSDVP               | IKFDKILYN-EF-NHYDVATGKF | 241 |
| <i>Otolemur garnettii</i> ADIF1     | 197 | ----      | P---                     | VLPKSAFTVGLTVLSK---- | F-PSSDVP               | IKFDKILYN-DF-NHYDIAGKGF | 241 |
| <i>Mus musculus</i> Adif1           | 226 | ----      | P---                     | LVPKSAFTVGLTVISK---- | F-PPDPAP               | IKFDKILYN-EL-NHYNVATGKF | 270 |
| <i>Rattus norvegicus</i> Adif1      | 213 | ----      | P---                     | MVPKSAFTVGLTVISK---- | F-PPDPVP               | IKFDKILYN-EQ-NHYNVATGKF | 257 |
| <i>Cavia porcellus</i> ADIF1        | 197 | ----      | P---                     | VLPKSAFTVGLTVLNK---- | F-PASDAP               | IKFDKILYN-EF-NHYDVATGKF | 241 |
| <i>Oryctolagus cuniculus</i> ADIF1  | 197 | ----      | P---                     | VLPKSAFTVGLTVLSK---- | F-PASDVP               | IKFDKILYN-EL-NHYNVATGKF | 241 |
| <i>Ochotona princeps</i> ADIF1      | 197 | ----      | P---                     | VTPKSAFTVGLTVLSK---- | F-PDADVP               | IKFDKILYN-DL-NHYNVATGKF | 241 |
| <i>Bos taurus</i> ADIF1             | 197 | ----      | P---                     | VLPKSAFTVGLTVLSK---- | F-PSSDTP               | IKFDKILYN-EF-HHYNVATGKF | 241 |
| <i>Equus caballus</i> ADIF1         | 197 | ----      | P---                     | VLPKSAFTVGLTVLSK---- | F-PSSDVP               | IKFDKILYN-EF-NHFDIATGKF | 241 |
| <i>Canis lupus familiaris</i> ADIF1 | 197 | ----      | P---                     | VLPKSAFTVGLTVLSK---- | F-PTSDVP               | IKFDKILYN-EF-NHYDVATGKF | 241 |
| <i>Felis catus</i> ADIF1            | 197 | ----      | P---                     | VLPKSAFTVGLTVLSK---- | F-PASDAP               | IKFDKILYN-EF-NHYDVATGKF | 241 |
| <i>Dasyopus novemcinctus</i> ADIF1  | 198 | ----      | P---                     | VPPKSAFTVGLTVLSK---- | F-PSSDVP               | IKFDKILYN-EF-NHFDIATGKF | 242 |
| <i>Loxodonta africana</i> ADIF1     | 197 | ----      | P---                     | VLPKSAFTVGLTVLSK---- | F-PSSDLP               | IKFDKILYN-EF-HHYNVATGKF | 241 |
| <i>Homo sapiens</i> ADIG            | 194 | ----      | RCGSIVLKS                | AFSVGIT-TS-----      | Y-PEERLPI              | IFNKVLEN-EG-EHYNPATGKF  | 239 |
| <i>Pan troglodytes</i> ADIG         | 194 | ----      | RCGSIVLKS                | AFSVGIT-TS-----      | Y-PEERLPI              | IFNKVLEN-EG-EHYNPATGKF  | 239 |
| <i>Pongo abelii</i> ADIG            | 194 | ----      | RCGSIVLKS                | AFSVGIT-TS-----      | Y-PEERLPI              | IFNKVLEN-EG-EHYNPATGKF  | 239 |
| <i>Callithrix jacchus</i> ADIG      | 180 | ----      | RCGSIVLKS                | AFSVGIT-TS-----      | Y-PEERLPI              | IFNKVLEN-EG-EHYNPATGKF  | 225 |
| <i>Otolemur garnettii</i> ADIG      | 140 | ----      | RCGSIVLKS                | AFSVGIT-TS-----      | Y-PEERLPI              | IFNKVLEN-EG-EHYNPATGKF  | 185 |
| <i>Mus musculus</i> Adig            | 182 | ----      | RCGSIVLKS                | AFSVGIT-TS-----      | Y-PEERLPI              | IFNKVLEN-EG-EHYNPATGKF  | 227 |
| <i>Rattus norvegicus</i> Adig       | 183 | ----      | RCGSIVLKS                | AFSVGIT-TS-----      | Y-PEERLPI              | IFNKVLEN-EG-EHYNPATGKF  | 228 |
| <i>Cavia porcellus</i> ADIG         | 140 | ----      | RCGSIVLKS                | AFSVGIT-TS-----      | Y-PEERLPI              | IFNKVLEN-EG-EHYNPATGKF  | 185 |
| <i>Oryctolagus cuniculus</i> ADIG   | 140 | ----      | RCGSIVLKS                | AFSVGIT-TS-----      | Y-PEERLPI              | IFNKVLEN-EG-EHYNPATGKF  | 185 |
| <i>Tursiops truncatus</i> ADIG      | 192 | ----      | RCGSIVLKS                | AFSVGIT-TS-----      | Y-PEERLPI              | IFNKVLEN-EG-EHYNPATGKF  | 237 |
| <i>Bos taurus</i> ADIG              | 140 | ----      | RCGSIVLKS                | AFSVGIT-TS-----      | Y-PEERLPI              | IFNKVLEN-EG-EHYNPATGKF  | 185 |
| <i>Equus caballus</i> ADIG          | 181 | ----      | KCGSIVLKS                | AFSVGIT-TS-----      | Y-PEERLPI              | IFNKVLEN-EG-EHYNPATGKF  | 226 |
| <i>Canis lupus familiaris</i> ADIG  | 181 | ----      | RCGSIMLKS                | AFSVGIT-TS-----      | Y-PEERLPI              | IFNKVLEN-EG-EHYNPATGKF  | 226 |
| <i>Myotis lucifugus</i> ADIG        | 140 | ----      | RCGSIVLKS                | AFSVGIT-TS-----      | Y-PEERLPI              | IFNKVLEN-EG-EHYNPATGKF  | 185 |
| <i>Homo sapiens</i> ADIH            | 142 | ----      | SCGSGHTKS                | AFSVAVT-KS-----      | Y-PRERLPI              | IKFDKILMN-EG-GHYNASSGKF | 187 |
| <i>Pan troglodytes</i> ADIH         | 142 | ----      | SCGSGHTKS                | AFSVAVT-KS-----      | Y-PRERLPI              | IKFDKILMN-EG-GHYNASSGKF | 187 |
| <i>Pongo abelii</i> ADIH            | 142 | ----      | SCGSGHTKS                | AFSVAVT-KS-----      | Y-PRERLPI              | IKFDKILMN-EG-GHYNASSGKF | 187 |
| <i>Nomascus leucogenys</i> ADIH     | 142 | ----      | SCGSGHTKS                | AFSVAVT-KS-----      | Y-PRERLPI              | IKFDKILMN-EG-GHYNASSGKF | 187 |
| <i>Macaca mulatta</i> ADIH          | 142 | ----      | SCGSGHTKS                | AFSVAVT-KS-----      | Y-PRERLPI              | IKFDKILMN-EG-GHYNASSGKF | 187 |
| <i>Papio hamadryas</i> ADIH         | 142 | ----      | SCGSGHTKS                | AFSVAVT-KS-----      | Y-PRERLPI              | IKFDKILMN-EG-GHYNASSGKF | 187 |
| <i>Mus musculus</i> Adih            | 149 | ----      | SCGSSRAKS                | AFSVAVT-KS-----      | Y-PRERLPI              | IKFDKILMN-EG-GHYNASSGKF | 194 |
| <i>Rattus norvegicus</i> Adih       | 186 | ----      | SCGSSRAKS                | AFSVAVT-KS-----      | Y-PRERLPI              | IKFDKILMN-EG-GHYNASSGKF | 231 |
| <i>Dipodomys ordii</i> ADIH         | 142 | ----      | SCGSGRAKS                | AFSVAVT-KS-----      | Y-PRERLPI              | IKFDKILMN-EG-GHYNASSGKF | 187 |
| <i>Cavia porcellus</i> ADIH         | 142 | ----      | SCGSGRPKS                | AFSVAVT-KS-----      | Y-PRERLPI              | IKFDKILMN-EG-GHYNASSGKF | 187 |
| <i>Bos taurus</i> ADIH              | 159 | ----      | SCGSSHAKS                | AFSVAVT-KS-----      | Y-PRERLPI              | IKFDKILMN-EG-GHYNASSGKF | 204 |
| <i>Equus caballus</i> ADIH          | 142 | ----      | SCGSGRAKS                | AFSVAVT-KS-----      | Y-PRERLPI              | IKFDKILMN-EG-GHYNASSGKF | 187 |
| <i>Canis lupus familiaris</i> ADIH  | 142 | ----      | SCGSGHAKS                | AFSVAVT-KS-----      | Y-PRERLPI              | IKFDKILMN-EG-GHYNASSGKF | 187 |
| <i>Pteropus vampyrus</i> ADIH       | 142 | ----      | SCSSGHAKS                | AFSVAVT-KS-----      | Y-PRERLPI              | IKFDKILMN-EG-SHYNASSGKF | 187 |
| <i>Loxodonta africana</i> ADIH      | 142 | ----      | SCGSARAKS                | AFSVAVT-KS-----      | Y-PRERLPI              | IKFDKILMN-EG-GHYNASSGKF | 187 |
| <i>Homo sapiens</i> ADII            | 152 | AT-FS---- | GPKIAFYVGLKSP-H--E----   | GYEV-LKF             | DDVVTNL-G-NHYDPTTGKF   | 195                     |     |
| <i>Pongo abelii</i> ADII            | 152 | AT-FS---- | GPKIAFYVGLKSP-H--E----   | GYEV-LKF             | DDVVTNL-G-NHYDPTTGKF   | 195                     |     |
| <i>Macaca mulatta</i> ADII          | 152 | AT-FS---- | GPKIAFYVGLKSP-H--E----   | GYEV-LKF             | DDVVTNL-G-NHYDPTTGKF   | 195                     |     |
| <i>Mus musculus</i> Adii            | 152 | AA-FS---- | GPKIAFYVGLKSP-H--E----   | GYEV-LKF             | DDVVTNL-G-NHYDPTTGKF   | 195                     |     |
| <i>Rattus norvegicus</i> Adii       | 152 | AA-FS---- | GPKIAFYVGLKSP-H--E----   | GYEV-LKF             | DDVVTNL-G-NHYDPTTGKF   | 195                     |     |
| <i>Bos taurus</i> ADII              | 152 | AA-FS---- | GPKIAFYVGLKSP-H--E----   | GYEV-LKF             | DDVVTNL-G-NHYDPTTGKF   | 195                     |     |
| <i>Canis lupus familiaris</i> ADII  | 152 | AA-FS---- | GPKIAFYVGLKSP-H--E----   | GYEV-LKF             | DDVVTNL-G-NHYDPTTGKF   | 195                     |     |
| <i>Dasyopus novemcinctus</i> ADII   | 152 | AA-FS---- | GPKIAFYVGLKSP-H--E----   | GYEV-LKF             | DDVVTNL-G-NHYDPTTGKF   | 195                     |     |
| <i>Homo sapiens</i> ADIJ            | 118 | AATYS---  | TVPKIAFYAGLKRQ-H--E----  | GYEV-LKF             | DDVVTNL-G-NHYDPTTGKF   | 163                     |     |
| <i>Pan troglodytes</i> ADIJ         | 118 | AATYS---  | TVPKIAFYAGLKRQ-H--E----  | GYEV-LKF             | DDVVTNL-G-NHYDPTTGKF   | 163                     |     |
| <i>Papio hamadryas</i> ADIJ         | 118 | AATYS---  | TVPKIAFYAGLKRQ-H--E----  | GYEV-LKF             | DDVVTNL-G-NHYDPTTGKF   | 163                     |     |
| <i>Mus musculus</i> Adij            | 118 | AATYS---  | TVPKIAFYAGLKRQ-H--E----  | GYEV-LKF             | DDVVTNL-G-NHYDPTTGKF   | 163                     |     |
| <i>Rattus norvegicus</i> Adij       | 118 | AATYS---  | TVPKIAFYAGLKRQ-H--E----  | GYEV-LKF             | DDVVTNL-G-NHYDPTTGKF   | 163                     |     |
| <i>Oryctolagus cuniculus</i> ADIJ   | 118 | AATYS---  | TVPKIAFYAGLKRQ-H--E----  | GYEV-LKF             | DDVVTNL-G-NHYDPTTGKF   | 163                     |     |
| <i>Bos taurus</i> ADIJ              | 118 | AATYS---  | TVPKIAFYAGLKRQ-H--E----  | GYEV-LKF             | DDVVTNL-G-NHYDPTTGKF   | 163                     |     |
| <i>Canis lupus familiaris</i> ADIJ  | 118 | AATYS---  | TVPKIAFYAGLKRQ-H--E----  | GYEV-LKF             | DDVVTNL-G-NHYDPTTGKF   | 163                     |     |
| <i>Loxodonta africana</i> ADIJ      | 118 | AATYS---  | TVPKIAFYAGLKRQ-H--E----  | GYEV-LKF             | DDVVTNL-G-NHYDPTTGKF   | 163                     |     |
| <i>Homo sapiens</i> ADIK            | 103 | AAGY----  | VPRIAFYAGLRRP-H--E----   | GYEV-LRF             | DDVVTNV-G-NAYEAASGKF   | 146                     |     |
| <i>Pan troglodytes</i> ADIK         | 103 | AAGY----  | VPRIAFYAGLRRP-H--E----   | GYEV-LRF             | DDVVTNV-G-NAYEAASGKF   | 146                     |     |
| <i>Gorilla gorilla</i> ADIK         | 103 | AARY----  | VPRIAFYAGLRRP-H--E----   | GYEV-LRF             | DDVVTNV-G-NAYEAASGKF   | 146                     |     |
| <i>Papio hamadryas</i> ADIK         | 103 | AAGY----  | VPRIAFYAGLRRP-H--E----   | GYEV-LRF             | DDVVTNV-G-NAYEAASGKF   | 146                     |     |
| <i>Callithrix jacchus</i> ADIK      | 103 | PAGY----  | VPRIAFYAGLRRP-H--E----   | GYEV-LRF             | DDVVTNV-G-NAYEAASGKF   | 146                     |     |
| <i>Rattus norvegicus</i> Adik       | 103 | PAGY----  | VPRIAFYAGLRRP-H--E----   | GYEV-LRF             | DDVVTNV-G-NAYEAASGKF   | 146                     |     |
| <i>Cavia porcellus</i> ADIK         | 103 | PAGY----  | VPRIAFYAGLRRP-H--E----   | GYEV-LRF             | DDVVTNV-G-NAYEAASGKF   | 146                     |     |
| <i>Equus caballus</i> ADIK          | 103 | PAGY----  | VPRIAFYAGLRRP-H--E----   | GYEV-LRF             | DDVVTNV-G-NAYEAASGKF   | 146                     |     |
| <i>Canis lupus familiaris</i> ADIK  | 103 | PAGY----  | VPRIAFYAGLRRP-H--E----   | GYEV-LRF             | DDVVTNV-G-NAYEAASGKF   | 146                     |     |
| <i>Dasyopus novemcinctus</i> ADIK   | 103 | PAGY----  | MPRIAFYAGLRRP-H--E----   | GYEV-LRF             | DDVVTNV-G-NAYEAASGKF   | 146                     |     |
| <i>Loxodonta africana</i> ADIK      | 103 | PAGY----  | VPRIAFYAGLRRP-H--E----   | GYEV-LRF             | DDVVTNV-G-NAYEAASGKF   | 146                     |     |
| <i>Mus musculus</i> Adil            | 121 | TATYT---  | TVPRVAFYAGLKNP-H--E----  | GYEV-LKF             | DDVVTNL-G-NNYDAASGKF   | 166                     |     |
| <i>Rattus norvegicus</i> Adil       | 121 | TATYT---  | TVPRVAFYAGLKNP-H--E----  | GYEV-LKF             | DDVVTNL-G-NNYDAASGKF   | 166                     |     |
| <i>Homo sapiens</i> ADIM            | 225 | -----     | PELQIAFEMASLAT--HFSN---- | QNSG-IF              | IFSSVETNI-G-NFFDVMTGKF | 266                     |     |
| <i>Pan troglodytes</i> ADIM         | 225 | -----     | PELQIAFEMASLAT--HFSN---- | QNSG-IF              | IFSSVETNI-G-NFFDVMTGKF | 266                     |     |

|                                    |     |                                                                |     |
|------------------------------------|-----|----------------------------------------------------------------|-----|
| <i>Pongo abelii</i> ADIM           | 181 | -----PELQIAFMASLAT--HFSN-----QNSG-IIFSSVETNI-G-NFFDVMTCGRF     | 222 |
| <i>Nomascus leucogenys</i> ADIM    | 225 | -----PELQIAFMASLAT--HFSN-----QNSG-IIFSSVETNI-G-NFFDVMTCGRF     | 266 |
| <i>Papio hamadryas</i> ADIM        | 225 | -----PELQIAFMASLAT--HFSN-----QNSG-IIFSSVETNI-G-NFFDVMTCGRF     | 266 |
| <i>Callithrix jacchus</i> ADIM     | 215 | -----PELQIAFMASLAT--HFSN-----QNSG-IIFSSVETNI-G-NFFDVMTCGRF     | 256 |
| <i>Mus musculus</i> Adim           | 114 | -----PELQIAFMASLAT--HFSN-----QNSG-IIFSSVETNI-G-NFFDVMTCGRF     | 155 |
| <i>Rattus norvegicus</i> Adim      | 188 | -----PELQIAFMASLAT--HFSN-----QNSG-IIFSSVETNI-G-NFFDVMTCGRF     | 229 |
| <i>Cavia porcellus</i> ADIM        | 181 | -----PELQIAFMASLAT--HFTN-----QNSG-IIFSSVETNI-G-NFFDVMTCGRF     | 222 |
| <i>Bos taurus</i> ADIM             | 114 | -----PELQIAFMASLAT--HFTN-----QNSG-IIFSSVETNI-G-NFFDVMTCGRF     | 155 |
| <i>Equus caballus</i> ADIM         | 114 | -----PELQIAFMASLAT--HFTN-----QNSG-IIFSSVETNI-G-NFFDVMTCGRF     | 155 |
| <i>Canis lupus familiaris</i> ADIM | 175 | -----PELQIAFMASLAT--HFSN-----QNSG-IIFSSVETNI-G-NFFDVMTCGRF     | 216 |
| <i>Homo sapiens</i> ADIN           | 172 | P-----PEPRSAFSAARTRSLVGS DAGPGRHQ-PLAFDTEFVNIGG--DFDAAAAGVF    | 221 |
| <i>Pan troglodytes</i> ADIN        | 172 | P-----PEPRSAFSAARTRSLVGS DAGPGRHR-PLAFDTEFVNIGG--DFDAAAAGVF    | 221 |
| <i>Pongo abelii</i> ADIN           | 172 | P-----PEPRSAFSAARTRSLVGS DAGPGRHR-PLAFDTEFVNIGG--DFDAAAAGVF    | 221 |
| <i>Nomascus leucogenys</i> ADIN    | 167 | P-----PEPRSAFSAARTRSLVGS DAGPGRHR-PLAFDTEFVNIGG--DFDAAAAGVF    | 216 |
| <i>Macaca mulatta</i> ADIN         | 174 | P-----PEPRSAFSAARTRSLVGS DAGSGRHR-PLSEFDELVNIGG--DFDAAAAGVF    | 223 |
| <i>Callithrix jacchus</i> ADIN     | 172 | P-----PEPRSAFSAARTHSLVGS DASPGRHR-PLAFDDELVNIGG--DFDAAAAGVF    | 221 |
| <i>Mus musculus</i> Adin           | 170 | A-----PEPRSAFSAARTRSLVGS DAAPGRHR-PLAFDDELVNIGG--DFDAAAAGVF    | 219 |
| <i>Cavia porcellus</i> ADIN        | 182 | P-----SQPRSAFSAARTRSLVGS DAGPGRHR-PLAFDDELVNIGG--DFDAAAAGVF    | 231 |
| <i>Tursiops truncatus</i> ADIN     | 168 | P-----PEPRSAFSAARTRSLVGS DAGPGRHR-PLAFDDELVNIGG--DFDAAAAGVF    | 217 |
| <i>Canis lupus familiaris</i> ADIN | 168 | P-----PEPRSAFSAARTRSLVGS DAGPGRHR-PLAFDDELVNIGG--DFDAAAAGVF    | 217 |
| <i>Dasyops novemcinctus</i> ADIN   | 168 | P-----PEPRSAFSAARTRSLVGS DAGPGRHR-PLAFDDELVNIGG--DFDAAAAGVF    | 217 |
| <i>Loxodonta africana</i> ADIN     | 168 | P-----PEPRSAFSAARTRSLVGS DSGPGRHR-PLAFDDELVNIGG--DFDAAAAGVF    | 217 |
| <i>Homo sapiens</i> ADIO           | 112 | ----C--RRAYAAFSVGRREGLHSSD-----HFQA-VEFDTELVLNLDG--AFDLAAGRF   | 156 |
| <i>Pan troglodytes</i> ADIO        | 112 | ----C--QRAYAAFSVGRREGLHSSD-----HFQA-VEFDTELVLNLDG--AFDLAAGRF   | 156 |
| <i>Macaca mulatta</i> ADIO         | 107 | ----C--QRAYAAFSVGRREGLHSSD-----DFQA-VEFDTELVLNLDG--AFDLAAGRF   | 151 |
| <i>Bos taurus</i> ADIO             | 111 | ----C--PRAYAAFSVGRREGLHSAD-----ALQA-VTFDELVLNLDG--AFDLASGRF    | 155 |
| <i>Myotis lucifugus</i> ADIO       | 111 | ----C--QRAYAAFSVGRREGLHSTD-----AFQA-VEFDTELVLNLDG--AFDLASGRF   | 155 |
| <i>Homo sapiens</i> ADIP           | 239 | ----C--KSHYAAFSVGRKKPMSNH-----YYQT-VIEFDELVNLYD--HFNMFYTKGF    | 283 |
| <i>Otolemur garnettii</i> ADIP     | 141 | ----C--KNHYAAFSVGRKKPLHSND-----YYQT-VVEFDELVNLYG--HFNMFYTKGF   | 185 |
| <i>Mus musculus</i> Adip           | 141 | ----C--KSQYAAFSVGRKKALHSND-----YFQP-VVEFDELVNLYK--HFNMFYTKGF   | 185 |
| <i>Cavia porcellus</i> ADIP        | 141 | ----C--KNYAAFSVGRKKPLHSND-----YYQT-VVEFDELVNLYG--HFNMFYTKGF    | 185 |
| <i>Bos taurus</i> ADIP             | 164 | ----C--KNHYAAFSVGRKKPLHSND-----YYQT-VIEFDELVNLYS--HFNMFYTKGF   | 208 |
| <i>Equus caballus</i> ADIP         | 139 | ----C--KNHYAAFSVGRKKPLHSND-----YYQT-VIEFDELVNLYD--HFNMFYTKGF   | 183 |
| <i>Loxodonta africana</i> ADIP     | 193 | ----C--KNHYAAFSVGRKKPLHSND-----YYQT-VVEFDELVNLYG--HFNMFYTKGF   | 237 |
| <i>Homo sapiens</i> ADIQ           | 139 | ----C--QKRFFAFSVGRKKTALHSGE-----DFQT-LLEFERVFNLDGCG--FDMATGQF  | 183 |
| <i>Pan troglodytes</i> ADIQ        | 139 | ----C--QKRFFAFSVGRKKTALHSGE-----DFQT-LLEFERVFNLDGCG--FDMATGQF  | 183 |
| <i>Pongo abelii</i> ADIQ           | 139 | ----C--QKRFFAFSVGRKKTALHSGD-----DFQT-LLEFERVFNLDGCG--FDMATGQF  | 183 |
| <i>Nomascus leucogenys</i> ADIQ    | 139 | ----C--QKRFFAFSVGRKKTALHSGE-----DFQT-LLEFERVFNLDGCG--FDMVYTKGF | 183 |
| <i>Macaca mulatta</i> ADIQ         | 139 | ----C--QKRFFAFSVGRKKTALHSGE-----DFQR-LLEFERVFNLDGCG--FDMAAGHF  | 183 |
| <i>Mus musculus</i> Adiq           | 125 | ----C--QTHYSAFSVGRKKTGLHSSE-----NFLS-LLEFDRVFNVDGHH--FDMATGSE  | 169 |
| <i>Rattus norvegicus</i> Adiq      | 124 | ----C--QTHYSAFSVGRKKTGLHSSE-----NFLS-LLEFDRVFNVDGHH--FDMATGSE  | 168 |
| <i>Homo sapiens</i> ADIR           | 24  | P-----QQMRVAFSAARTSNL-----A-PGTLDQ-PIVEDLLLNNLGE--TFDLQLGRF    | 68  |
| <i>Pan troglodytes</i> ADIR        | 24  | P-----QQMRVAFSAARTSNL-----A-PGTLDQ-PIVEDLLLNNLGE--TFDLQLGRF    | 68  |
| <i>Pongo abelii</i> ADIR           | 24  | P-----QQMRVAFSAARTSNL-----A-PGTLDQ-PIVEDLLLNNLGE--TFDLQLGRF    | 68  |
| <i>Nomascus leucogenys</i> ADIR    | 24  | P-----QQMRVAFSAARTSNL-----A-PGTLDQ-PIVEDLLLNNLGE--TFDLQLGRF    | 68  |
| <i>Macaca mulatta</i> ADIR         | 24  | P-----QQMRVAFSAARTSNL-----A-PGTLDQ-PIVEDLLLNNLGE--TFDLQLGRF    | 68  |
| <i>Papio hamadryas</i> ADIR        | 24  | P-----QQMRVAFSAARTSNL-----A-PGTLDQ-PIVEDLLLNNLGE--TFDLQLGRF    | 68  |
| <i>Callithrix jacchus</i> ADIR     | 24  | P-----QQMRVAFSAARTSNL-----A-PGTLDQ-PIVEDLLLNNLGE--TFDLQLGRF    | 68  |
| <i>Tarsius syrichta</i> ADIR       | 24  | P-----QQMRVAFSAARTSNL-----A-PGTLDQ-PIVEDLLLNNLGE--TFDLQLGRF    | 68  |
| <i>Otolemur garnettii</i> ADIR     | 24  | P-----QQMRVAFSAARTSNL-----A-PGTLDQ-PIVEDLLLNNLGE--TFDLQLGRF    | 68  |
| <i>Tupaia belangeri</i> ADIR       | 24  | P-----QQMRVAFSAARTSNL-----A-PGTLDQ-PIVEDLLLNNLGE--TFDLQLGRF    | 68  |
| <i>Mus musculus</i> Adir           | 24  | P-----QQMRVAFSAARTSNL-----A-PGTLDQ-PIVEDLLLNNLGE--TFDLQLGRF    | 68  |
| <i>Rattus norvegicus</i> Adir      | 24  | P-----QQMRVAFSAARTSNL-----A-PGTLDQ-PIVEDLLLNNLGE--TFDLQLGRF    | 68  |
| <i>Cavia porcellus</i> ADIR        | 24  | P-----QQMRVAFSAARTSNL-----A-PGTLDQ-PIVEDLLLNNLGE--TFDLQLGRF    | 68  |
| <i>Oryctolagus cuniculus</i> ADIR  | 24  | P-----QQMRVAFSAARTSNL-----A-PGTLDQ-PIVEDLLLNNLGE--TFDLQLGRF    | 68  |
| <i>Tursiops truncatus</i> ADIR     | 24  | P-----QQMRVAFSAARTSNL-----A-PGTLDQ-PIVEDLLLNNLGE--TFDLQLGRF    | 68  |
| <i>Bos taurus</i> ADIR             | 24  | P-----QQMRVAFSAARTSNL-----A-PGTLDQ-PIVEDLLLNNLGE--TFDLQLGRF    | 68  |
| <i>Equus caballus</i> ADIR         | 24  | P-----QQMRVAFSAARTSNL-----A-PGTLDQ-PIVEDLLLNNLGE--TFDLQLGRF    | 68  |
| <i>Canis lupus familiaris</i> ADIR | 24  | P-----QQMRVAFSAARTSNL-----A-PGTLDQ-PIVEDLLLNNLGE--TFDLQLGRF    | 68  |
| <i>Myotis lucifugus</i> ADIR       | 24  | P-----QQMRVAFSAARTSNL-----A-PGTLDQ-PIVEDLLLNNLGE--TFDLQLGRF    | 68  |
| <i>Pteropus vampyrus</i> ADIR      | 24  | P-----QQMRVAFSAARTSNL-----A-PGTLDQ-PIVEDLLLNNLGE--TFDLQLGRF    | 68  |
| <i>Erinaceus europaeus</i> ADIR    | 1   | P-----MRVAFSAARTSNL-----T-PGTLDQ-PIVEDLLINNLGE--TFDLQLGRF      | 42  |
| <i>Dasyops novemcinctus</i> ADIR   | 24  | P-----QQMRVAFSAARTSNL-----A-PGTLDQ-PIVEDLLLNNLGE--TFDLQLGRF    | 68  |
| <i>Choloepus hoffmanni</i> ADIR    | 24  | P-----QQMRVAFSAARTSNL-----A-PGTLDQ-PIVEDLLLNNLGE--TFDLQLGRF    | 68  |
| <i>Loxodonta africana</i> ADIR     | 24  | P-----QQMRVAFSAARTSNL-----A-PGTLDQ-PIVEDLLLNNLGE--TFDLQLGRF    | 68  |

|                                    |     |                                                                                                              |     |
|------------------------------------|-----|--------------------------------------------------------------------------------------------------------------|-----|
| <i>Homo sapiens</i> ADIA           | 161 | -TCKVPGLYFETYH-----AS--SRGNLCVNLMRG--RERAQKVVTF--DYAY---                                                     | 202 |
|                                    |     | 730                  740                  750                  760                  770                  780 |     |
| <i>Homo sapiens</i> ADIA           | 161 | -TCKVPGLYFETYH-----AS--SRGNLCVNLMRG--RERAQKVVTF--DYAY---                                                     | 202 |
| <i>Papio hamadryas</i> ADIA        | 161 | -TCKVPGLYFETYH-----AS--SRGNLCVNLMRG--RERPQKVVTF--DYAY---                                                     | 202 |
| <i>Mus musculus</i> Adia           | 188 | -TCKVPGLYFETYH-----AS--SRGNLCVNLVRGRDRDSMQKVVTF--DYAQ---                                                     | 231 |
| <i>Rattus norvegicus</i> Adia      | 159 | -TCKVPGLYFETYH-----AS--SRGNLCVNLVRGRDRDRMQKVLTF--DYAQ---                                                     | 202 |
| <i>Cavia porcellus</i> ADIA        | 159 | -TCKVPGLYFETYH-----AS--SRGNLCVNLVLRG--REHLKVVTF--DYVR---                                                     | 200 |
| <i>Ochotona princeps</i> ADIA      | 159 | -TCKVPGLYFETYH-----AS--SRGNLCVNLVLRG--REKPKVLTFC--DYSI---                                                    | 200 |
| <i>Bos taurus</i> ADIA             | 155 | -TCKVPGLYFETYH-----AS--SRGQLCVDLMRG--RAEPQKVVTF--DYVQ---                                                     | 196 |
| <i>Equus caballus</i> ADIA         | 160 | -TCKVPGLYFAYH-----AS--SRGNLCVNLMRG--RERIQKVVTF--DFVH---                                                      | 201 |
| <i>Canis lupus familiaris</i> ADIA | 158 | -TCKVPGLYFAYH-----AS--SRGNLCVNLVVRG--RERMQKVVTF--DYVQ---                                                     | 199 |
| <i>Felis catus</i> ADIA            | 162 | -TCKVPGLYFETYH-----AS--SRGNLCVNLMRG--REQMQKVVTF--DYVH---                                                     | 203 |
| <i>Myotis lucifugus</i> ADIA       | 159 | -TCKVPGLYFETYH-----AS--SRGNLCVNLVLRG--LERMEKVVTF--DYVQ---                                                    | 200 |
| <i>Dasyopus novemcinctus</i> ADIA  | 156 | -TCKVPGLYFETFH-----AS--SRGNLCVNLVLRG--RERPQRVVAFC--DFVH---                                                   | 197 |
| <i>Loxodonta africana</i> ADIA     | 159 | -TCKVPGLYFETYH-----AS--SRGNLCVNLVVRG--RERVQKVVTF--DYVQ---                                                    | 200 |
| <i>Homo sapiens</i> ADIB           | 159 | -TCKVPGLYFVYH-----AS--HTANLCVLLYR-----SGVKVVTF--GHTS---                                                      | 197 |
| <i>Pan troglodytes</i> ADIB        | 159 | -TCKVPGLYFVYH-----AS--HTANLCVLLYR-----SGVKVVTF--GHTS---                                                      | 197 |
| <i>Pongo abelii</i> ADIB           | 159 | -TCKVPGLYFVYH-----AS--HTANLCVLLYR-----SGVKVVTF--GHTS---                                                      | 197 |
| <i>Nomascus leucogenys</i> ADIB    | 160 | -TCKVPGLYFVYH-----AS--HTANLCVLLYR-----SGVKVVTF--GHTS---                                                      | 198 |
| <i>Callithrix jacchus</i> ADIB     | 158 | -TCKVPGLYFVYH-----TS--QTANLCVLLYR-----NGVKVVTF--DHMS---                                                      | 196 |
| <i>Otolemur garnettii</i> ADIB     | 157 | -TCKVPGLYFVYH-----TS--QTANLCVHLYR-----NNVRVTF--DHMS---                                                       | 195 |
| <i>Mus musculus</i> Adib           | 190 | -TCKVPGLYFVYH-----TS--HTANLCVHLLN-----NLARVASFC--DHMF---                                                     | 228 |
| <i>Rattus norvegicus</i> Adib      | 182 | -TCKVPGLYFVHH-----TS--QTANLCVQLLL-----NNAKVTSFC--DHMS---                                                     | 220 |
| <i>Cavia porcellus</i> ADIB        | 206 | -TCKVPGLYFVIYH-----TS--LTENLCVQLYH-----DNVKVTF--EHLVQGN                                                      | 247 |
| <i>Oryctolagus cuniculus</i> ADIB  | 212 | -TCKVPGLYFVHH-----TS--HTANLCVQLYH-----NGARVTAFC--DHMA---                                                     | 250 |
| <i>Bos taurus</i> ADIB             | 157 | -TCKVPGLYFVYH-----TS--HTSNLCVLLYR-----SGFKVATFC--DHMT---                                                     | 195 |
| <i>Equus caballus</i> ADIB         | 177 | -TCKVPGLYFAHH-----TS--QTANLCVQLYR-----NGAKVTAFC--DHMS---                                                     | 215 |
| <i>Canis lupus familiaris</i> ADIB | 159 | -TCKVPGLYFVYH-----TS--LTSNLCVHLYR-----SGTRVTF--DHMS---                                                       | 197 |
| <i>Myotis lucifugus</i> ADIB       | 159 | -TCKVPGLYFVHH-----TS--QTANLCVQLYR-----NEIQMTSFC--DHMS---                                                     | 197 |
| <i>Loxodonta africana</i> ADIB     | 157 | -TCKVPGLYFVYH-----TS--QTANLCVQLYR-----SGVKVTF--DHMS---                                                       | 195 |
| <i>Homo sapiens</i> ADIC           | 152 | -VCTVPGYIYFTFQ-----VL--SQWEICLSIVSSS--RGQVRRSLGFC--DTTN---                                                   | 194 |
| <i>Macaca mulatta</i> ADIC         | 152 | -VCTVPGYIYFTFQ-----VV--SEREICLSIVSSS--RGQVRRSLGFC--DTTN---                                                   | 194 |
| <i>Papio hamadryas</i> ADIC        | 152 | -VCTVPGYIYFTFQ-----VV--SEREICLSIVSSS--RGQVRRSLGFC--DTTN---                                                   | 194 |
| <i>Callithrix jacchus</i> ADIC     | 152 | -VCAVPGYIYFTFQ-----VV--SKWDICLFIASSS--RGQVRRSLGFC--DANS---                                                   | 194 |
| <i>Mus musculus</i> Adic           | 152 | -ICAVPGFYIYFNFQ-----VI--SKWDLCLFIKSSS--GGQPRDSLFS--NTNN---                                                   | 194 |
| <i>Rattus norvegicus</i> Adic      | 164 | -ICAVPGFYIYFTFQ-----VI--SKWDLCLSISSS--RGQPRNSLGFC--DTNS---                                                   | 206 |
| <i>Cavia porcellus</i> ADIC        | 152 | -VCAVPGFYIYFSFY-----VV--ATGSICLTISSS--QGQLRHSPGFC--DTNN---                                                   | 194 |
| <i>Oryctolagus cuniculus</i> ADIC  | 193 | -VCAVPGFYIYFTFQ-----VV--SKWDLCLFIVSAS--RGQTRRSVGF--DTNS---                                                   | 235 |
| <i>Equus caballus</i> ADIC         | 185 | -VCSVPGYIYFTFQ-----VV--SKWDVCLSISSS--RDQVRHSLGFC--DTNS---                                                    | 227 |
| <i>Canis lupus familiaris</i> ADIC | 171 | -ICAVPGYIYFTFQ-----VV--SKWDICLSIVSSG--RAQIRRSLGFC--DTNS---                                                   | 213 |
| <i>Myotis lucifugus</i> ADIC       | 152 | -VCAVPGYIYFTFQ-----VV--SKWDICLSIMSSR--RGLTQRSVGF--DANS---                                                    | 194 |
| <i>Loxodonta africana</i> ADIC     | 167 | -VCAVPGYIYFTFQ-----VV--SKRDICLSIVSSG--RNHPRRSLGFC--DTNS---                                                   | 209 |
| <i>Homo sapiens</i> ADID           | 182 | -HCNIPGLYFAYH-----ITVYMKDVK--VSLFK---KDK--AMLFTY--DQYQE--                                                    | 222 |
| <i>Pan troglodytes</i> ADID        | 182 | -HCNIPGLYFAYH-----ITVYMKDVK--VSLFK---KDK--AMLFTY--DQYQE--                                                    | 222 |
| <i>Pongo abelii</i> ADID           | 151 | -HCNIPGLYFAYH-----ITVYMKDVK--VSLFK---KDK--AMLFTY--DQYQE--                                                    | 191 |
| <i>Nomascus leucogenys</i> ADID    | 181 | -HCNIPGLYFAYH-----ITVYMKDVK--VSLFK---KDK--AMLFTY--DQYQE--                                                    | 221 |
| <i>Macaca mulatta</i> ADID         | 180 | -HCNIPGLYFAYH-----ITVYMKDVK--VSLFK---KDK--AMLFTY--DQYQE--                                                    | 220 |
| <i>Otolemur garnettii</i> ADID     | 151 | -LONIPGLYFSYH-----ITVYMKDVK--VSLFK---KDK--AVIVTY--DQYQD--                                                    | 191 |
| <i>Mus musculus</i> Adid           | 165 | -YCNIPGLYFSYH-----ITVYMKDVK--VSLFK---KDK--AVLFTY--DQYQE--                                                    | 205 |
| <i>Rattus norvegicus</i> Adid      | 151 | -HCNIPGLYFSYH-----ITVYMKDVK--VSLFK---KDK--AVLFTY--DQYQE--                                                    | 191 |
| <i>Cavia porcellus</i> ADID        | 193 | -HCNIPGLYFSYH-----VTYLLKDVK--VSLFR---NDK--AELFTY--DQYQD--                                                    | 233 |
| <i>Oryctolagus cuniculus</i> ADID  | 161 | -RCNIPGLYFSYH-----ITVYMKDVK--VSLFK---KDK--AMLFTY--DQYQD--                                                    | 201 |
| <i>Bos taurus</i> ADID             | 146 | -LONIPGLYFSYH-----ITVYLLKDVK--VSLYK---NDK--ALLFTH--DQYQD--                                                   | 186 |
| <i>Equus caballus</i> ADID         | 208 | -HCNIPGLYFSYH-----ITVYLLKDVK--VSLYK---KDK--AVLFTY--DQYQD--                                                   | 248 |
| <i>Canis lupus familiaris</i> ADID | 160 | -HCNIPGLYFSYH-----ITVYLLKDVK--VSLYK---KDK--AMLFTY--DQYQE--                                                   | 200 |
| <i>Felis catus</i> ADID            | 151 | -HCNIPGLYFSYH-----ITVYLLKDVK--VSLYK---RDK--AMLFTY--DQYQE--                                                   | 191 |
| <i>Myotis lucifugus</i> ADID       | 160 | -HCNIPGLYFSYH-----ITVYHKDVK--VSLYK---KDK--AVLFTF--DKYQD--                                                    | 200 |
| <i>Dasyopus novemcinctus</i> ADID  | 150 | -HCNIPGLYFSYH-----ITVYMKDVK--VSLFK---KDK--AVLFTY--DQYQE--                                                    | 190 |
| <i>Loxodonta africana</i> ADID     | 151 | -HCNIPGVYFSYH-----ITVYMKDVK--VSLFK---KDK--AVLFTY--DQYQE--                                                    | 191 |
| <i>Homo sapiens</i> ADIE           | 144 | -TCKVPGVYFAVH-----ATVYRASLQ--FDLVK---NGE--SIASFF--QFFGGW--                                                   | 185 |
| <i>Pan troglodytes</i> ADIE        | 144 | -TCKVPGVYFAVH-----ATVYRASLQ--FDLVK---NGE--SIASFF--QFFGGW--                                                   | 185 |
| <i>Pongo abelii</i> ADIE           | 144 | -TCKVPGVYFAVH-----ATVYRASLQ--FDLVK---NGE--SIASFF--QFFGGW--                                                   | 185 |
| <i>Papio hamadryas</i> ADIE        | 144 | -TCKVPGVYFAVH-----ATVYRASLQ--FDLVK---NGE--SIASFF--QFFGGW--                                                   | 185 |
| <i>Callithrix jacchus</i> ADIE     | 144 | -TCKVPGVYFAVH-----ATVYRASLQ--FDLMK---NGE--SIASFF--QFFGGW--                                                   | 185 |
| <i>Otolemur garnettii</i> ADIE     | 144 | -TCKVPGVYFAVH-----ATVYRASLQ--FDLVK---NGV--SIASFF--QFFGGW--                                                   | 185 |
| <i>Mus musculus</i> Adie           | 144 | -TCKVPGVYFAVH-----ATVYRASLQ--FDLVK---NGQ--SIASFF--QYFGGW--                                                   | 185 |
| <i>Rattus norvegicus</i> Adie      | 144 | -TCKVPGVYFAVH-----ATVYRASLQ--FDLVK---NGQ--SIASFF--QFFGGW--                                                   | 185 |
| <i>Homo sapiens</i> ADIF1          | 242 | -TCHIAGVYFETYH-----ITVFSRNVQ--VSLVK---NGV--KILHTK--DAYM---                                                   | 281 |
| <i>Homo sapiens</i> ADIF2          | 242 | -TCHIAGVYFETYH-----ITVFSRNVQ--VSLVK---NGV--KILHTK--DAYM---                                                   | 281 |
| <i>Pan troglodytes</i> ADIF1       | 242 | -TCHIAGVYFETYH-----ITVFSRNVQ--VSLVK---NRV--KILHTK--DAYM---                                                   | 281 |
| <i>Pongo abelii</i> ADIF1          | 242 | -TCHIAGVYFETYH-----ITVFSRNVQ--VSLVK---NGV--KILHTK--DAYM---                                                   | 281 |
| <i>Nomascus leucogenys</i> ADIF1   | 242 | -TCHIAGVYFETYH-----ITVFSRNVQ--VSLVK---NGV--KILHTK--DAYM---                                                   | 281 |
| <i>Macaca mulatta</i> ADIF1        | 242 | -TCHIAGVYFETYH-----ITVFSRNVQ--VSLVK---NGV--KILHTK--DAYM---                                                   | 281 |
| <i>Papio hamadryas</i> ADIF1       | 242 | -TCHIAGVYFETYH-----ITVFSRNVQ--VSLVK---NGV--KILHTK--DAYM---                                                   | 281 |

|                                     |     |                                                             |     |
|-------------------------------------|-----|-------------------------------------------------------------|-----|
| <i>Microcebus murinus</i> ADIF1     | 242 | -TCHVAGVYFETYH-----ITVFSRNVQ-VSLVK---NGA-KVLHTK---DGYM---   | 281 |
| <i>Otolemur garnettii</i> ADIF1     | 242 | -VCHVAGVYFETYH-----ITVFSRNVQ-VSLVK---NGV-KILHTK---DGYM---   | 281 |
| <i>Mus musculus</i> Adif1           | 271 | -TCHVAGVYFETYH-----ITVFSRNVQ-VSLVK---NGV-KVLHTK---DSYM---   | 310 |
| <i>Rattus norvegicus</i> Adif1      | 258 | -TCHVAGVYFETYH-----ITVFSRNVQ-VSLVK---NGV-KVLHTK---DGYM---   | 297 |
| <i>Cavia porcellus</i> ADIF1        | 242 | -TCHIAGTYFETYH-----VTVFSRNVQ-VALVK---NGV-KVLHTK---DGYM---   | 281 |
| <i>Oryctolagus cuniculus</i> ADIF1  | 242 | -TCHVAGVYFETYH-----ITVFSRNVQ-VSLVK---NGV-KVLHTK---DGYM---   | 281 |
| <i>Ochotona princeps</i> ADIF1      | 242 | -ICVYAGVYFETYH-----ITVFSRNVQ-VSLVK---NGM-KVLHTK---DAYM---   | 281 |
| <i>Bos taurus</i> ADIF1             | 242 | -TCHVAGVYFETYH-----ITVFSRNIQ-VSLVK---NGA-KVLHTK---DGYT---   | 281 |
| <i>Equus caballus</i> ADIF1         | 242 | -TCHLAGVYFETYH-----VTVFSRNVQ-VSLVK---NGV-KILHTK---DGYT---   | 281 |
| <i>Canis lupus familiaris</i> ADIF1 | 242 | -TCHVAGVYFETYH-----ITVFSRNVQ-VSLVK---NGV-KILHTK---DSYM---   | 281 |
| <i>Felis catus</i> ADIF1            | 242 | -TCHVAGVYFETYH-----ITVFSRNVQ-VALVK---NGV-KILHTK---DGYM---   | 281 |
| <i>Dasyopus novemcinctus</i> ADIF1  | 243 | -TCHIAGTYFETYH-----ITVFSRNVQ-VSLVK---NGV-KVLHTK---DSYM---   | 282 |
| <i>Loxodonta africana</i> ADIF1     | 242 | -TCHIAGTYFETYH-----ITVFSRNVQ-VSLVK---NGV-KVLHTK---DGYL---   | 281 |
| <i>Homo sapiens</i> ADIG            | 240 | -ICAFPGIYFESYD-----ITLANKHLA-IGLVH---NGQ-YRIKTF---DANTG--   | 280 |
| <i>Pan troglodytes</i> ADIG         | 240 | -ICAFPGIYFESYD-----ITLANKHLA-IGLVH---NGQ-YRIKTF---DANTG--   | 280 |
| <i>Pongo abelii</i> ADIG            | 240 | -ICAFPGIYFESYD-----ITLANKHLA-IGLVH---NGQ-YRIKTF---DANTG--   | 280 |
| <i>Callithrix jacchus</i> ADIG      | 226 | -ICAFPGIYFESYD-----ITLANKHLA-IGLVH---NGQ-YRIKTF---DANTG--   | 266 |
| <i>Otolemur garnettii</i> ADIG      | 186 | -ICAFPGIYFESYD-----ITLANKHLA-IGLVH---NGQ-YRIKTF---DANTG--   | 226 |
| <i>Mus musculus</i> Adig            | 228 | -ICAFPGIYFESYD-----ITLANKHLA-IGLVH---NGQ-YRIRTF---DANTG--   | 268 |
| <i>Rattus norvegicus</i> Adig       | 229 | -ICAFPGIYFESYD-----ITLANKHLA-IGLVH---NGQ-YRIRTF---DANTG--   | 269 |
| <i>Cavia porcellus</i> ADIG         | 186 | -ICAFPGIYFESYD-----ITLANKHLA-IGLVH---NGQ-YRIKTF---DANTG--   | 226 |
| <i>Oryctolagus cuniculus</i> ADIG   | 186 | -ICAFPGIYFESYD-----ITLANKHLA-IGLVH---NGQ-YRIRTF---DANTG--   | 226 |
| <i>Tursiops truncatus</i> ADIG      | 238 | -ICAFPGIYFESYD-----ITLANKHLA-IGLVH---NGQ-YRIKTF---DANTG--   | 278 |
| <i>Bos taurus</i> ADIG              | 186 | -ICAFPGIYFESYD-----ITLANKHLA-IGLVH---NGQ-YRIKTF---DANTG--   | 226 |
| <i>Equus caballus</i> ADIG          | 227 | -ICAFPGIYFESYD-----ITLANKHLA-IGLVH---NGQ-YRIKTF---DANTG--   | 267 |
| <i>Canis lupus familiaris</i> ADIG  | 227 | -ICAFPGIYFESYD-----ITLANKHLA-IGLVH---NGQ-YRIKTF---DANTG--   | 267 |
| <i>Myotis lucifugus</i> ADIG        | 186 | -ICAFPGIYFESYD-----ITLANKHLA-IGLVH---NGQ-YRIKTF---DANTG--   | 226 |
| <i>Homo sapiens</i> ADIH            | 188 | -VCGVPGIYFETYD-----ITLANKHLA-IGLVH---NGQ-YRIKTF---DANTG--   | 228 |
| <i>Pan troglodytes</i> ADIH         | 188 | -VCGVPGIYFETYD-----ITLANKHLA-IGLVH---NGQ-YRIRTF---DANTG--   | 228 |
| <i>Pongo abelii</i> ADIH            | 188 | -VCGVPGIYFETYD-----ITLANKHLA-IGLVH---NGQ-YRIRTF---DANTG--   | 228 |
| <i>Nomascus leucogenys</i> ADIH     | 188 | -VCGVPGIYFETYD-----ITLANKHLA-IGLVH---NGQ-YRIRTF---DANTG--   | 228 |
| <i>Macaca mulatta</i> ADIH          | 188 | -VCGVPGIYFETYD-----ITLANKHLA-IGLVH---NGQ-YRIRTF---DANTG--   | 228 |
| <i>Papio hamadryas</i> ADIH         | 188 | -VCGVPGIYFETYD-----ITLANKHLA-IGLVH---NGQ-YRIRTF---DANTG--   | 228 |
| <i>Mus musculus</i> Adih            | 195 | -VCSVPGIYFETYD-----ITLANKHLA-IGLVH---NGQ-YRIRTF---DANTG--   | 235 |
| <i>Rattus norvegicus</i> Adih       | 232 | -VCSVPGIYFETYD-----ITLANKHLA-IGLVH---NGQ-YRIRTF---DANTG--   | 272 |
| <i>Dipodomys ordii</i> ADIH         | 188 | -VCGVPGVYFETYD-----ITLANKHLA-IGLVH---NGQ-YRIRTF---DANTG--   | 228 |
| <i>Cavia porcellus</i> ADIH         | 188 | -ICGVPGIYFETYD-----ITLANKHLA-IGLVH---NGQ-YRIRTF---DANTG--   | 228 |
| <i>Bos taurus</i> ADIH              | 205 | -VCGVPGIYFETYD-----ITLANKHLA-IGLVH---NGQ-YRIRTF---DANTG--   | 245 |
| <i>Equus caballus</i> ADIH          | 188 | -VCGVPGIYFESYD-----ITLANKHLA-IGLVH---NGQ-YRIRTF---DANTG--   | 228 |
| <i>Canis lupus familiaris</i> ADIH  | 188 | -VCGVPGIYFETYD-----ITLANKHLA-IGLVH---NGQ-YRIRTF---DANTG--   | 228 |
| <i>Pteropus vampyrus</i> ADIH       | 188 | -VCSVPGIYFETYD-----ITLANKHLA-IGLVH---NGQ-YRIRTF---DANTG--   | 228 |
| <i>Loxodonta africana</i> ADIH      | 188 | -VCGVPGIYFETYD-----ITLANKHLA-IGLVH---NGQ-YRIRTF---DANTG--   | 228 |
| <i>Homo sapiens</i> ADII            | 196 | -SQQVRGIYFETYHILMRGGDGTSMW-ADL-C---K---NGQ-VRASAI-AQADQ---  | 240 |
| <i>Pongo abelii</i> ADII            | 196 | -SQQVRGIYFETYHILMRGGDGTSMW-ADL-C---K---NGQ-VRASAI-AQADQ---  | 240 |
| <i>Macaca mulatta</i> ADII          | 196 | -SQQVRGIYFETYHILMRGGDGTSMW-ADL-C---K---NGQ-VRASAI-AQADQ---  | 240 |
| <i>Mus musculus</i> Adii            | 196 | -SQQVRGIYFETYHILMRGGDGTSMW-ADL-C---K---NGQ-VRASAI-AQADQ---  | 240 |
| <i>Rattus norvegicus</i> Adii       | 196 | -SQQVRGIYFETYHILMRGGDGTSMW-ADL-C---K---NGQ-VRASAI-AQADQ---  | 240 |
| <i>Bos taurus</i> ADII              | 196 | -SQQVRGIYFETYHILMRGGDGTSMW-ADL-C---K---NGQ-VRASAI-AQADQ---  | 240 |
| <i>Canis lupus familiaris</i> ADII  | 196 | -SQQVRGIYFETYHILMRGGDGTSMW-ADL-C---K---NGQ-VRASAI-AQADQ---  | 240 |
| <i>Dasyopus novemcinctus</i> ADII   | 196 | -SQQVRGIYFETYHILMRGGDGTSMW-ADL-C---K---NGQ-VRASAI-AQADQ---  | 240 |
| <i>Homo sapiens</i> ADIJ            | 164 | -TCSIPGIYFETYHVLMRGGDGTSMW-ADL-C---K---NNQ-VRASAI-AQADQ---  | 208 |
| <i>Pan troglodytes</i> ADIJ         | 164 | -TCSIPGIYFETYHVLMRGGDGTSMW-ADL-C---K---NNQ-VRASAI-AQADQ---  | 208 |
| <i>Papio hamadryas</i> ADIJ         | 164 | -TCSIPGIYFETYHVLMRGGDGTSMW-ADL-C---K---NNQ-VRASAI-AQADQ---  | 208 |
| <i>Mus musculus</i> Adij            | 164 | -TCSIPGIYFETYHVLMRGGDGTSMW-ADL-C---K---NNQ-VRASAI-AQADQ---  | 208 |
| <i>Rattus norvegicus</i> Adij       | 164 | -TCSIPGIYFETYHVLMRGGDGTSMW-ADL-C---K---NNQ-VRASAI-AQADQ---  | 208 |
| <i>Oryctolagus cuniculus</i> ADIJ   | 164 | -TCSIPGIYFETYHVLMRGGDGTSMW-ADL-C---K---NNQ-VRASAI-AQADQ---  | 208 |
| <i>Bos taurus</i> ADIJ              | 164 | -TCSIPGIYFETYHVLMRGGDGTSMW-ADL-C---K---NNQ-VRASAI-AQADQ---  | 208 |
| <i>Canis lupus familiaris</i> ADIJ  | 164 | -TCSIPGIYFETYHVLMRGGDGTSMW-ADL-C---K---NNQ-VRASAI-AQADQ---  | 208 |
| <i>Loxodonta africana</i> ADIJ      | 164 | -TCSIPGIYFETYHVLMRGGDGTSMW-ADL-C---K---NNQ-VRASAI-AQADQ---  | 208 |
| <i>Homo sapiens</i> ADIK            | 147 | -TCPMPGVYFFAYHVLMRGGDGTSMW-ADL----MK---NGQ-VRASAI-AQADQ---  | 191 |
| <i>Pan troglodytes</i> ADIK         | 147 | -TCPMPGVYFFAYHVLMRGGDGTSMW-ADL----MK---NGQ-VRASAI-AQADQ---  | 191 |
| <i>Gorilla gorilla</i> ADIK         | 147 | -TCPMPGVYFFAYHVLMRGGDGTSMW-ADL----MK---NGQ-VRASAI-AQADQ---  | 191 |
| <i>Papio hamadryas</i> ADIK         | 147 | -TCPMPGVYFFAYHVLMRGGDGTSMW-ADL----MK---NGQ-VRASAI-AQADQ---  | 191 |
| <i>Callithrix jacchus</i> ADIK      | 147 | -TCPMPGVYFFAYHVLMRGGDGTSMW-ADL----MK---NGQ-VRASAI-AQADQ---  | 191 |
| <i>Rattus norvegicus</i> Adik       | 147 | -TCPMPGVYFFAYHVLMRGGDGTSMW-ADL----MK---NGQ-VRASAI-AQADQ---  | 191 |
| <i>Cavia porcellus</i> ADIK         | 147 | -TCPMPGVYFFAYHVLMRGGDGTSMW-ADL----MK---NGQ-VRASAI-AQADQ---  | 191 |
| <i>Equus caballus</i> ADIK          | 147 | -TCPMPGVYFFAYHVLMRGGDGTSMW-ADL----MK---NGQ-VRASAI-AQADQ---  | 191 |
| <i>Canis lupus familiaris</i> ADIK  | 147 | -TCPMPGVYFFAYHVLMRGGDGTSMW-ADL----MK---NGQ-VRASAI-AQADQ---  | 191 |
| <i>Dasyopus novemcinctus</i> ADIK   | 147 | -TCPMPGVYFFAYHVLMRGGDGTSMW-ADL----MK---NGQ-VRASAI-AQADQ---  | 191 |
| <i>Loxodonta africana</i> ADIK      | 147 | -TCPMPGVYFFAYHVLMRGGDGTSMW-ADL----MK---NGQ-VRASAI-AQADQ---  | 191 |
| <i>Mus musculus</i> Adil            | 167 | -TCSNIPGTYFETYHVLMRGGDGTSMW-ADL-C---K---NGQ-VRASAI-AQADQ--- | 211 |
| <i>Rattus norvegicus</i> Adil       | 167 | -TCSNIPGTYFETYHVLMRGGDGTSMW-ADL-C---K---NGQ-VRASAI-AQADQ--- | 211 |
| <i>Homo sapiens</i> ADIM            | 267 | GA-PVSGVYFFTFSM-MKHEDVEEVY-----VYLMH---NGN-TVFSMY--SYEM---  | 308 |
| <i>Pan troglodytes</i> ADIM         | 267 | GA-PVSGVYFFTFSM-MKHEDVEEVY-----VYLMH---NGN-TVFSMY--SYEM---  | 308 |

|                                    |     |             |                      |          |                      |          |     |
|------------------------------------|-----|-------------|----------------------|----------|----------------------|----------|-----|
| <i>Pongo abelii</i> ADIM           | 223 | GA-PVSGVYFF | TFSM-MKHEDVEEVY----- | VYLMH--- | NGN-TVFSMY--         | SYEM---- | 264 |
| <i>Nomascus leucogenys</i> ADIM    | 267 | GA-PVSGVYFF | TFSM-MKHEDVEEVY----- | VYLMH--- | NGN-TVFSMY--         | SYEM---- | 308 |
| <i>Papio hamadryas</i> ADIM        | 267 | GA-PVSGVYFF | TFSM-MKHEDVEEVY----- | VYLMH--- | NGN-TVFSMY--         | SYEM---- | 308 |
| <i>Callithrix jacchus</i> ADIM     | 257 | GA-PVSGVYFF | TFSM-MKHEDVEEVY----- | VYLMH--- | NGN-TVFSMY--         | SYET---- | 298 |
| <i>Mus musculus</i> Adim           | 156 | GA-PVSGVYFF | TFSM-MKHEDVEEVY----- | VYLMH--- | NGN-TVFSMY--         | SYET---- | 197 |
| <i>Rattus norvegicus</i> Adim      | 230 | GA-PVSGVYFF | TFSM-MKHEDVEEVY----- | VYLMH--- | NGN-TVFSMY--         | SYET---- | 271 |
| <i>Cavia porcellus</i> ADIM        | 223 | GA-PVSGVYFF | TFSM-MKHEDVDEVY----- | VYLMH--- | NGN-TVFSMY--         | SYET---- | 264 |
| <i>Bos taurus</i> ADIM             | 156 | GA-PVSGVYFF | TFSM-MKHEDVEEVY----- | VYLMH--- | NGN-TVFSMY--         | SYET---- | 197 |
| <i>Equus caballus</i> ADIM         | 156 | GA-PVSGVYFF | TFSM-MKHEDVEEVY----- | VYLMH--- | NGN-TVFSMY--         | SYET---- | 197 |
| <i>Canis lupus familiaris</i> ADIM | 217 | GA-PVSGVYFF | TFSM-MKHEDVEEVY----- | VYLMH--- | NGN-TVFSMY--         | SYET---- | 258 |
| <i>Homo sapiens</i> ADIN           | 222 | -RRLPGAYFF  | SFTLG-KLPRK-TLS----- | VKLMK--- | NRDEVQAMIY--         | DDGAS--- | 264 |
| <i>Pan troglodytes</i> ADIN        | 222 | -RRLPGAYFF  | SFTLG-KMPRK-TLS----- | VKLMK--- | NRDEVQAMIY--         | DDGAS--- | 264 |
| <i>Pongo abelii</i> ADIN           | 222 | -RRLPGAYFF  | SFTLG-KLPRK-TLS----- | VKLMK--- | NRDEVQAMIY--         | DDGAS--- | 264 |
| <i>Nomascus leucogenys</i> ADIN    | 217 | -RRLPGAYFF  | SFTLG-KLPRK-TLS----- | VKLMK--- | NRDEVQAMIY--         | DDGAS--- | 259 |
| <i>Macaca mulatta</i> ADIN         | 224 | -RRLPGAYFF  | SFTLG-KLPRK-TLS----- | VKLMK--- | NRDEVQAMIY--         | DDGAS--- | 266 |
| <i>Callithrix jacchus</i> ADIN     | 222 | -RRLPGAYFF  | SFTLG-KLPRK-TLS----- | VKLMK--- | NRDEVQAMIY--         | DDGAS--- | 264 |
| <i>Mus musculus</i> Adin           | 220 | -RRLPGAYFF  | SFTLG-KLPRK-TLS----- | VKLMK--- | NRDEVQAMIY--         | DDGAS--- | 262 |
| <i>Cavia porcellus</i> ADIN        | 232 | -RRLPGAYFF  | SFTLG-KMPRK-TLS----- | VKLMK--- | NRDEVQAMIY--         | DDGAS--- | 274 |
| <i>Tursiops truncatus</i> ADIN     | 218 | -RRLPGAYFF  | SFTLG-KLPRK-TLS----- | VKLMK--- | NRDEVQAMIY--         | DDGTS--- | 260 |
| <i>Canis lupus familiaris</i> ADIN | 218 | -RRLPGAYFF  | SFTLG-KLPRK-TLS----- | VKLMK--- | NRDEVQAMIY--         | DDGAS--- | 260 |
| <i>Dasyops novemcinctus</i> ADIN   | 218 | -RRLPGAYFF  | SFTLG-KLPRK-TLS----- | VKLMK--- | NRDEVQAMIY--         | DDGAS--- | 260 |
| <i>Loxodonta africana</i> ADIN     | 218 | -RRLPGAYFF  | SFTLG-KLPRK-TLS----- | VKLMK--- | NRDEVQAMIY--         | DDGGS--- | 260 |
| <i>Homo sapiens</i> ADIO           | 157 | -LCTVPGVYFL | SLNVH-TWNYKET-Y----- | LHIML--- | NRRPA-AVLY-AQPSE---- | 198      |     |
| <i>Pan troglodytes</i> ADIO        | 157 | -LCTVPGVYFL | SLNVH-TWNYKET-Y----- | LHVML--- | NRRPA-AVLY-AQPSE---- | 198      |     |
| <i>Macaca mulatta</i> ADIO         | 152 | -LCTVPGVYFL | SLNVH-TWNYKET-Y----- | LHIML--- | NRRPA-AVLY-AQPSE---- | 193      |     |
| <i>Bos taurus</i> ADIO             | 156 | -FCTAPGVYFL | SLNVH-TWNYKET-Y----- | LHIMR--- | NARAA-AVLY-AQPSE---- | 197      |     |
| <i>Myotis lucifugus</i> ADIO       | 156 | -LCIVPGVYFL | SLTVH-TWNYKET-Y----- | LHIMC--- | NQQT-AVLY-AQPSE----  | 197      |     |
| <i>Homo sapiens</i> ADIP           | 284 | -YCYVPGIYFF | SLNVH-TWNQKET-Y----- | LHIMK--- | NEEEV-VILF-AQVGD---- | 325      |     |
| <i>Otolemur garnettii</i> ADIP     | 186 | -YCYVPGIYFF | SLNVH-TWNQKET-Y----- | LHIMR--- | NAAEV-VILY-AQVSD---- | 227      |     |
| <i>Mus musculus</i> Adip           | 186 | -YCYVPGIYFF | SLNVH-TWNQKET-Y----- | LHIMK--- | NEEEV-VILY-AQVSD---- | 227      |     |
| <i>Cavia porcellus</i> ADIP        | 186 | -YCYVPGIYFF | SLNVH-TWNQKET-Y----- | LHIMR--- | NAAEV-VILY-AQVSD---- | 227      |     |
| <i>Bos taurus</i> ADIP             | 209 | -YCYVPGIYFF | SLNVH-TWNQKET-Y----- | LHIMK--- | NAAEV-VILY-AQVSD---- | 250      |     |
| <i>Equus caballus</i> ADIP         | 184 | -YCYVPGIYFF | SLNVH-TWNQKET-Y----- | LHIMK--- | NGEEV-VILY-AQVSD---- | 225      |     |
| <i>Loxodonta africana</i> ADIP     | 238 | -YCYVPGIYFF | SLNVH-TWNQKET-Y----- | LHIMR--- | NAAEA-VILY-AQVSD---- | 279      |     |
| <i>Homo sapiens</i> ADIQ           | 184 | AA-PLRGIYFF | SLNVH-SWNYKET-Y----- | VHIMH--- | NQKEA-VILY-AQPSE---- | 225      |     |
| <i>Pan troglodytes</i> ADIQ        | 184 | AA-PLRGIYFF | SLNVH-SWNYKET-Y----- | VHIMH--- | NQKEA-VILY-AQPSE---- | 225      |     |
| <i>Pongo abelii</i> ADIQ           | 184 | AA-PLRGIYFF | SLNVH-SWNYKET-Y----- | VHIMH--- | NQKEA-VILY-AQPSE---- | 225      |     |
| <i>Nomascus leucogenys</i> ADIQ    | 184 | AA-PLRGIYFF | SLNVH-SWNYKET-Y----- | VHIMH--- | NQKEA-VILY-AQPSE---- | 225      |     |
| <i>Macaca mulatta</i> ADIQ         | 184 | AA-PLRGIYFF | SLNVH-SWNYKET-Y----- | VHIMH--- | NQKEA-VILY-AQPSE---- | 225      |     |
| <i>Mus musculus</i> Adiq           | 170 | VA-PLRGLYFF | SLNVH-SWNYKET-Y----- | VHIVH--- | NEQAV-VILY-AQPSE---- | 211      |     |
| <i>Rattus norvegicus</i> Adiq      | 169 | VA-PLRGLYFF | SLNVH-SWNYKET-Y----- | VHIVH--- | NEQAV-VILY-AQPSE---- | 210      |     |
| <i>Homo sapiens</i> ADIR           | 69  | -NCPVNGTYVF | IFHML-KLAVNVPLY----- | VNLMK--- | N-EEVLVSAY-ANDGAP--- | 112      |     |
| <i>Pan troglodytes</i> ADIR        | 69  | -NCPVNGTYVF | IFHML-KLAVNVPLY----- | VNLMK--- | N-EEVLVSAY-ANDGAP--- | 112      |     |
| <i>Pongo abelii</i> ADIR           | 69  | -NCPVNGTYVF | IFHML-KLAVNVPLY----- | VNLMK--- | N-EEVLVSAY-ANDGAP--- | 112      |     |
| <i>Nomascus leucogenys</i> ADIR    | 69  | -NCPVNGTYVF | IFHML-KLAVNVPLY----- | VNLMK--- | N-EEVLVSAY-ANDGAP--- | 112      |     |
| <i>Macaca mulatta</i> ADIR         | 69  | -NCPVNGTYVF | IFHML-KLAVNVPLY----- | VNLMK--- | N-EEVLVSAY-ANDGAP--- | 112      |     |
| <i>Papio hamadryas</i> ADIR        | 69  | -NCPVNGTYVF | IFHML-KLAVNVPLY----- | VNLMK--- | N-EEVLVSAY-ANDGAP--- | 112      |     |
| <i>Callithrix jacchus</i> ADIR     | 69  | -NCPVNGTYVF | IFHML-KLAVNVPLY----- | VNLMK--- | N-EEVLVSAY-ANDGAP--- | 112      |     |
| <i>Tarsius syrichta</i> ADIR       | 69  | -NCPVNGTYVF | IFHML-KLAVNVPLY----- | VNLMK--- | N-EEVLVSAY-ANDGAP--- | 112      |     |
| <i>Otolemur garnettii</i> ADIR     | 69  | -NCPVNGTYVF | IFHML-KLAVNVPLY----- | VNLMK--- | N-EEVLVSAY-ANDGAP--- | 112      |     |
| <i>Tupaia belangeri</i> ADIR       | 69  | -NCPVNGTYVF | IFHML-KLAVNVPLY----- | VNLMK--- | N-EEVLVSAY-ANDGAP--- | 112      |     |
| <i>Mus musculus</i> Adir           | 69  | -NCPVNGTYVF | IFHML-KLAVNVPLY----- | VNLMK--- | N-EEVLVSAY-ANDGAP--- | 112      |     |
| <i>Rattus norvegicus</i> Adir      | 69  | -NCPVNGTYVF | IFHML-KLAVNVPLY----- | VNLMK--- | N-EEVLVSAY-ANDGAP--- | 112      |     |
| <i>Cavia porcellus</i> ADIR        | 69  | -SCPVNGTYVF | IFHML-KLAVNVPLY----- | VNLMK--- | N-EEVLVSAY-ANDGAP--- | 112      |     |
| <i>Oryctolagus cuniculus</i> ADIR  | 69  | -NCPVNGTYVF | IFHML-KLAVNVPLY----- | VNLMK--- | N-EEVLVSAY-ANDGAP--- | 112      |     |
| <i>Tursiops truncatus</i> ADIR     | 69  | -NCPVNGTYVF | IFHML-KLAVNVPLY----- | VNLMK--- | N-EEVLVSAY-ANDGAP--- | 112      |     |
| <i>Bos taurus</i> ADIR             | 69  | -NCPVNGTYVF | IFHML-KLAVNVPLY----- | VNLMK--- | N-EEVLVSAY-ANDGAP--- | 112      |     |
| <i>Equus caballus</i> ADIR         | 69  | -NCPVNGTYVF | IFHML-KLAVNVPLY----- | VNLMK--- | N-EEVLVSAY-ANDGAP--- | 112      |     |
| <i>Canis lupus familiaris</i> ADIR | 69  | -NCPVNGTYVF | IFHML-KLAVNVPLY----- | VNLMK--- | N-EEVLVSAY-ANDGAP--- | 112      |     |
| <i>Myotis lucifugus</i> ADIR       | 69  | -NCPVNGTYVF | IFHML-KLAVNVPLY----- | VNLMK--- | N-EEVLVSAY-ANDGAP--- | 112      |     |
| <i>Pteropus vampyrus</i> ADIR      | 69  | -NCPVNGTYVF | IFHML-KLAVNVPLY----- | VNLMK--- | N-EEVLVSAY-ANDGAP--- | 112      |     |
| <i>Erinaceus europaeus</i> ADIR    | 43  | -ACPVNGTYVF | IFHML-KLAVNVPLY----- | VNLMR--- | N-EEVLVSAY-ANDGAP--- | 86       |     |
| <i>Dasyops novemcinctus</i> ADIR   | 69  | -NCPVNGTYVF | IFHML-KLAVNVPLY----- | VNLMK--- | N-EEVLVSAY-ANDGAP--- | 112      |     |
| <i>Choloepus hoffmanni</i> ADIR    | 69  | -NCPVNGTYVF | IFHML-KLAVNVPLY----- | VNLMK--- | N-EEVLVSAY-ANDGAP--- | 112      |     |
| <i>Loxodonta africana</i> ADIR     | 69  | -NCPVNGTYVF | IFHML-KLAVNVPLY----- | VNLMK--- | N-EEVLVSAY-ANDGAP--- | 112      |     |

*Homo sapiens* ADIA 203 --NTFQVTTGGMVLKLEQGENVFLQA--TD--KNSLL--GMEGANSIFSGFLLFPD-MEA 253  
790 800 810 820 830 840  
*Homo sapiens* ADIA 203 --NTFQVTTGGMVLKLEQGENVFLQA--TD--KNSLL--GMEGANSIFSGFLLFPD-MEA 253  
*Papio hamadryas* ADIA 203 --NTFQVTTGGMVLKLEQGENVFLQA--TD--KNSLL--GMEGANSIFSGFLLFPD-VEA 253  
*Mus musculus* Adia 232 --NTFQVTTGGVVLKLEQEEVHVLQA--TD--KNSLL--GIEGANSIFSGFLLFPD-MDA 282  
*Rattus norvegicus* Adia 203 --NTFQVTTGGVVLKLEQEEVHVLQA--TD--KNSLL--GVEGANSIFSGFLLFPD-MDV 253  
*Cavia porcellus* ADIA 201 --NSFQVTTGGVVLKLEREEMVYLEA--TN--QNALL--GIEGANSIFSGFLLFPD-VEL 251  
*Ochotona princeps* ADIA 201 --STFQVTTGGVVLKLEMGESVHLQA--ND--KNSLL--AMEGANSIFSGFLLFPD-ADV 251  
*Bos taurus* ADIA 197 --NTFQVTTGSIVLKLKEDTVFLQA--TE--KNALV--GIEGANSIFSGFLLFPD-TEA 247  
*Equus caballus* ADIA 202 --NTFQVTTGGIVLKLLEETVFLQA--TD--RNSLL--GMEGANSIFSGFLLFPD-REA 252  
*Canis lupus familiaris* ADIA 200 --NTFQVTTGSVVLKLSQGENVFLQA--TD--KNSLL--GMEGANSIFSGFLLFPD-AEA 250  
*Felis catus* ADIA 204 --NTFQVSTGSMVLKLEKQGENVFLQA--TD--KNSLV--GIEGANSIFSGFLLFPD-VEA 254  
*Myotis lucifugus* ADIA 201 --STFQVTTGGIVLKLGLGESVFLQA--TD--RNSLL--GIEGANSIFSGFLLFPN-PEV 251  
*Dasypus novemcinctus* ADIA 198 --SSFQVTTGGVVLKLEGLGENVFLQA--TD--RNSLL--GLDGANSIFSGFLLFPD-AEA 248  
*Loxodonta africana* ADIA 201 --STFQVTTMGVVLKLAQGENVFLQA--TD--KNSLL--GMEGANSIFSGFLLFPD-AEA 251  
*Homo sapiens* ADIB 198 --KTNQVNSGGVLLRLQVGEVVLAV--ND--YYDMV--GIQGSDFSGFLLFPD---- 245  
*Pan troglodytes* ADIB 198 --KTNQVNSGGVLLRLQVGEVVLAV--ND--YYEMV--GIQGSDFSGFLLFPD---- 245  
*Pongo abelii* ADIB 198 --KTNQVNSGGVLLRLQVGEVVLAV--ND--YYDMV--GIQGSDFSGFLLFPD---- 245  
*Nomascus leucogenys* ADIB 199 --KTNQVNSGGVLLRLQVGEVVLAV--ND--YYEMV--GIQGSDFSGFLLFPD---- 246  
*Callithrix jacchus* ADIB 197 --NTKQVNSGGVLLRLQVGEVVLAV--ND--YNGMV--GIEGSDVFSGFLLFPD---- 244  
*Otolemur garnettii* ADIB 196 --NSKQVNSGGVLLRLQVGEVVLAV--ND--YNGMV--GTEGSDVFSGFLLFPD---- 243  
*Mus musculus* Adib 229 --NSKQVNSGGVLLRLQVGEVVLAV--ND--YNGMV--GIEGSDVFSGFLLFPD---- 276  
*Rattus norvegicus* Adib 221 --NSKQVNSGGVLLRLQVGEVVLAV--ND--YNGMV--GTEGSDVFSGFLLFPD---- 268  
*Cavia porcellus* ADIB 248 SQDSKQVTSGGVVLHLQQAQVVLGV--ND--YNGMV--GTQGSDFSGFLLFPD---- 297  
*Oryctolagus cuniculus* ADIB 251 --NTKQVNSGGVLLRLQVGEVVLAV--ND--YNGMV--GTEGSDVFSGFLLFPD---- 298  
*Bos taurus* ADIB 196 --SAKQVNSGGVLLRLQVGEVVLAV--ND--YNGMV--GMEGSDVFSGFLLFPD---- 243  
*Equus caballus* ADIB 216 --NSKQVNSGGVLLRLQVGEVVLAV--ND--YNGMV--GTRGSDVFSGFLLFPD---- 263  
*Canis lupus familiaris* ADIB 198 --NSKQVNSGGVLLRLQVGEVVLAV--ND--YNGMV--GTEGSDVFSGFLLFPD---- 245  
*Myotis lucifugus* ADIB 198 --NSKQVNSGGVLLRLQQAQVVLAV--ND--YNGMV--GTEGSDVFSGFLLFPD---- 245  
*Loxodonta africana* ADIB 196 --NKKQVNSGGVLLRLQVGEVVLAV--ND--YNGMV--GTEGSDVFSGFLLFPD---- 243  
*Homo sapiens* ADIC 195 --KGLFQVNSGGMVLQLQGDQVWVE---KDP--KKGHIYQGSE--ADSVFSGFIIFP--S-A 245  
*Macaca mulatta* ADIC 195 --KGLFQVNSGGMVLQLQGDQVWVE---KDP--RKGNIYQGLE--ADSVFSGFIIFP--S-T 245  
*Papio hamadryas* ADIC 195 --KGLFQVNSGGMVLQLQGDQVWVE---KDP--RKGNIYHGLE--ADSVFSGFIIFP--S-T 245  
*Callithrix jacchus* ADIC 195 --KGLFQVNSGGMVLQLQGDQVWVE---KDP--SKGRIYQGSE--ADSVFSGFIIFP--S-A 245  
*Mus musculus* Adic 195 --KGLFQVLAGGTVLQLRRGDEVWIE---KDP--AKGRIYQTE--ADSVFSGFIIFP--S-A 245  
*Rattus norvegicus* Adic 207 --KGLFQVLAGGTVLQLRRGDEVWIE---KDP--AKGRIYQTE--ADSVFSGFIIFP--S-A 257  
*Cavia porcellus* ADIC 195 --KGLFQVLAGGTVLQLRRGDEVWIE---KDP--SKGNIYQGLE--ADSVFSGFIIFP--S-V 244  
*Oryctolagus cuniculus* ADIC 236 --KGLFQVNSGGTALQLQGDQVWVE---KDP--ARGRIYQTE--ADSVFSGFIIFP--S-A 286  
*Equus caballus* ADIC 228 --RGIFQVNSGGTALQLDRGDKVRIE---KE---RGRIYQGE--ADSVFSGFIIFP--S-T 276  
*Canis lupus familiaris* ADIC 214 --KGLFQVNSGGMALQLQGDQVWVE---KDP--IKGRIYQPE--ADSVFSGFIIFP--S-L 264  
*Myotis lucifugus* ADIC 195 --RGTQVNSGGTALQLQGDQVWVE---KDP--VKGRIYQTE--ADSVFSGFIIFP--S-A 245  
*Loxodonta africana* ADIC 210 --RGLFQVNSGGTALQLQGDQVWVE---KDP--VKGHIYQTD--ADSVFSGFIIFP--S-T 260  
*Homo sapiens* ADID 223 --NNVDQASGSVLLHLEVGDVVLLQVYGE--RNG--LYAD--NDNSTFTGFLLYHD--TN- 275  
*Pan troglodytes* ADID 223 --NNVDQASGSVLLHLEVGDVVLLQVYGE--RNG--LYAD--NDNSTFTGFLLYHD--TN- 275  
*Pongo abelii* ADID 192 --NNVDQASGSVLLHLEVGDVVLLQVYGE--RNG--LYAD--NDNSTFTGFLLYHD--TN- 244  
*Nomascus leucogenys* ADID 222 --NNVDQASGSVLLHLEVGDVVLLQVYGE--RNG--LYAD--NDNSTFTGFLLYHD--TN- 274  
*Macaca mulatta* ADID 221 --NNVDQASGSVLLHLEVGDVVLLQVYGE--RNG--LYAD--NDNSTFTGFLLYHD--TN- 273  
*Otolemur garnettii* ADID 192 --KNVDQASGSVLLHLEVGDVVLLQVYGD--HNG--LYAD--NVNSTFTGFLLYHD--TN- 244  
*Mus musculus* Adid 206 --KNVDQASGSVLLHLEVGDVVLLQVYGD--HNG--LYAD--NVNSTFTGFLLYHD--TN- 258  
*Rattus norvegicus* Adid 192 --KNVDQASGSVLLHLEVGDVVLLQVYGD--HNG--LYAD--NVNSTFTGFLLYHD--TN- 244  
*Cavia porcellus* ADID 234 --KNVDQASGSVLLHLEVGDVVLLQVYGN--QAG--VYAD--NVNSTFTGFLLYHD--LTD 288  
*Oryctolagus cuniculus* ADID 202 --KNVDQASGSVLLHLEVGDVVLLQVYGD--HNG--LYAD--NVNSTFTGFLLYHD--TE- 254  
*Bos taurus* ADID 187 --KNVDQASGSVLLHLEVGDVVLLQVYGE--HNG--VYAD--NVNSTFTGFLLYHN--IVE- 240  
*Equus caballus* ADID 249 --KNLDQASGSVLLHLEVGDVVLLQVYGD--HNG--LYAD--NVNSTFTGFLLYHD--TN- 301  
*Canis lupus familiaris* ADID 201 --KNVDQASGSVLLHLEVGDVVLLQVYGD--SYG--IYAD--NVNSTFTGFLLYHD--TN- 253  
*Felis catus* ADID 192 --KNVDQASGSVLLHLEVGDVVLLQVYGD--YNG--LYAD--NVNSTFTGFLLYHD--TV- 244  
*Myotis lucifugus* ADID 201 --QDQVNSGSVLLHLEMGDVVLLQVYGE--NNG--LYAD--NINDSTFTGFLLYHD--TN- 253  
*Dasypus novemcinctus* ADID 191 --KNVDQASGSVLLHLEMGDVVLLQVYGE--QMG--LYAD--NVNSTFTGFLLYHN--IE- 243  
*Loxodonta africana* ADID 192 --KNVDQASGSVLLHLEVGDVVLLQVYAD--QNG--LYAD--NVNSTFTGFLLYHD--TN- 245  
*Homo sapiens* ADIE 186 --PKPASLGGAMVRLPEPDQVWVQVGVGD--YIG--IYAS--IKTDFSGFIVYSD--WHS 238  
*Pan troglodytes* ADIE 186 --PKPASLGGAMVRLPEPDQVWVQVGVGD--YIG--IYAS--IKTDFSGFIVYSD--WHS 238  
*Pongo abelii* ADIE 186 --PKPASLGGAMVRLPEPDQVWVQVGVGD--YIG--IYAS--IKTDFSGFIVYSD--WHS 238  
*Papio hamadryas* ADIE 186 --PKPASLGGAMVRLPEPDQVWVQVGVGD--YIG--IYAS--IKTDFSGFIVYSD--WHS 238  
*Callithrix jacchus* ADIE 186 --PKPASLGGAMVRLPEPDQVWVQVGVGD--YIG--IYAS--IKTDFSGFIVYSD--WHS 238  
*Otolemur garnettii* ADIE 186 --PKPASLGGAMVRLPEPDQVWVQVGVGD--YIG--IYAS--IKTDFSGFIVYSD--WHS 238  
*Mus musculus* Adie 186 --PKPASLGGAMVRLPEPDQVWVQVGVGD--YIG--IYAS--IKTDFSGFIVYSD--WHS 238  
*Rattus norvegicus* Adie 186 --PKPASLGGAMVRLPEPDQVWVQVGVGD--YIG--IYAS--IKTDFSGFIVYSD--WHS 238  
*Homo sapiens* ADIF1 282 --SSEDQASGGIVLQLKLGDEVVLQVTTGGER--FNG--LFAD--EDDDTFTGFLIF---SSP 333  
*Homo sapiens* ADIF2 282 --SSEDQASGGIVLQLKLGDEVVLQVTTGGER--FNG--LFAD--EDDDTFTGFLIF---SSQ 333  
*Pan troglodytes* ADIF1 282 --SSEDQASGGIVLQLKLGDEVVLQVTTGGER--FNG--LFAD--EDDDTFTGFLIF---SSP 333  
*Pongo abelii* ADIF1 282 --SSEDQASGGIVLQLKLGDEVVLQVTTGGER--FNG--LFAD--EDDDTFTGFLIF---SSP 333  
*Nomascus leucogenys* ADIF1 282 --SSEDQASGGIVLQLKLGDEVVLQVTTGGER--FNG--LFAD--EDDDTFTGFLIF---SSP 333  
*Macaca mulatta* ADIF1 282 --SSEDQASGGIVLQLKLGDEVVLQVTTGGER--FNG--LFAD--EDDDTFTGFLIF---GSP 333  
*Papio hamadryas* ADIF1 282 --SSEDQASGGIVLQLKLGDEVVLQVTTGGER--FNG--LFAD--EDDDTFTGFLIF---SSP 333



|                                     |     |                                                                |     |
|-------------------------------------|-----|----------------------------------------------------------------|-----|
| <i>Microcebus murinus</i> ADIF1     | 282 | --SSEDQASGGIVLQKLGDEVVMQVTTGGER-FNG-LFAD-EDDDTTFTGFLLF---SS-   | 332 |
| <i>Otolemur garnettii</i> ADIF1     | 282 | --GSEDQASGGIVLQKLGDEVVMQVTTGGER-FNG-LFAD-EDDDTTFTGFLLF---SS-   | 332 |
| <i>Mus musculus</i> Adif1           | 311 | --SSEDQASGGIVQELKLGDEVVMQVTTGGER-FNG-LFAD-EDDDTTFTGFLLF---SSS  | 362 |
| <i>Rattus norvegicus</i> Adif1      | 298 | --SSEDQASGGIVLELQKLGDEVVMQVTTGGER-FNG-LFAD-EDDDTTFTGFLLF---SSS | 349 |
| <i>Cavia porcellus</i> ADIF1        | 282 | --SSEDQASGGTVLPLKLGDEVVLQVTTGGER-FNG-LFAD-EDDDTTFTGFLLF---SSP  | 333 |
| <i>Oryctolagus cuniculus</i> ADIF1  | 282 | --SSEDQASGGIVLELQKLGDEVVMQVTTGGER-FNG-LFAD-EDDDTTFTGFLLF---SS- | 332 |
| <i>Ochotona princeps</i> ADIF1      | 282 | --SSEDQASGGVLELKLADDEVVLQVAGGER-FNG-LFAD-EDDDTTFTGFLLF---ST-   | 332 |
| <i>Bos taurus</i> ADIF1             | 282 | --SSEDQASGGTVLPLKLGDEVVMQVTTGGER-FNG-LFAD-EDDDTTFTGFLLF---SSS  | 333 |
| <i>Equus caballus</i> ADIF1         | 282 | --SSEDQASGGTILQKLGDEVVMQVTTGGER-FNG-LFAD-EDDDTTFTGFLLF---SSS   | 333 |
| <i>Canis lupus familiaris</i> ADIF1 | 282 | --SSEDQASGGIVLPLKLGDEVVMQVTTGGER-FNG-LFAD-EDDDTTFTGFLLF---SSQ  | 333 |
| <i>Felis catus</i> ADIF1            | 282 | --SSEDQASGGIVLPLKLGDEVVMQVAGGER-FNG-LFAD-EDDDTTFTGFLLF---S-Q   | 332 |
| <i>Dasyopus novemcinctus</i> ADIF1  | 283 | --SSEDQASGGMVLKLGDEVVLQASGGER-FNG-LFAD-EDDDTTFTGFLLF---SS-     | 333 |
| <i>Loxodonta africana</i> ADIF1     | 282 | --SSEDQASGGTVLELQKLGDEVVMQVTTGGER-FNG-LFAD-EDDDTTFTGFLLF---TSS | 333 |
| <i>Homo sapiens</i> ADIG            | 281 | ---NHDVASGSTVIYLPQPEDEVVLEIFFTD--QNG-LFSDPGWADSLFSGFLLYVD-TDY  | 333 |
| <i>Pan troglodytes</i> ADIG         | 281 | ---NHDVASGSTVIYLPQPEDEVVLEIFFTD--QNG-LFSDPGWADSLFSGFLLYVD-TDY  | 333 |
| <i>Pongo abelii</i> ADIG            | 281 | ---NHDVASGSTVIYLPQPEDEVVLEIFFTD--QNG-LFSDPGWADSLFSGFLLYVD-TDY  | 333 |
| <i>Callithrix jacchus</i> ADIG      | 267 | ---NHDVASGSTVIYLPQPEDEVVLEIFFTD--QNG-LFSDPGWADSLFSGFLLYVD-TDY  | 319 |
| <i>Otolemur garnettii</i> ADIG      | 227 | ---NHDVASGSTVIYLPQPEDEVVLEIFFTD--QNG-LFSDPGWADSLFSGFLLYVD-TDY  | 279 |
| <i>Mus musculus</i> Adig            | 269 | ---NHDVASGSTVIYLPQPEDEVVLEIFFND--QNG-LFSDPGWADSLFSGFLLYVD-TDY  | 321 |
| <i>Rattus norvegicus</i> Adig       | 270 | ---NHDVASGSTVIYLPQPEDEVVLEIFFND--QNG-LFSDPGWADSLFSGFLLYVD-TDY  | 322 |
| <i>Cavia porcellus</i> ADIG         | 227 | ---NHDVASGSTVIYLPQPEDEVVLEIFFTD--QNG-LFSDPGWADSLFSGFLLYVD-TDY  | 279 |
| <i>Oryctolagus cuniculus</i> ADIG   | 227 | ---NHDVASGSTVIYLPQPEDEVVLEIFFTD--QNG-LFSDPGWADSLFSGFLLYVD-TDY  | 279 |
| <i>Tursiops truncatus</i> ADIG      | 279 | ---NHDVASGSTVIYLPQPEDEVVLEIFFTD--QNG-LFSDPGWADSLFSGFLLYVD-TDY  | 331 |
| <i>Bos taurus</i> ADIG              | 227 | ---NHDVASGSTVIYLPQPEDEVVLEIFFTD--QNG-LFSDPGWADSLFSGFLLYVD-TDY  | 279 |
| <i>Equus caballus</i> ADIG          | 268 | ---NHDVASGSTVIYLPQPEDEVVLEIFFTD--QNG-LFSDPGWADSLFSGFLLYVD-TDY  | 320 |
| <i>Canis lupus familiaris</i> ADIG  | 268 | ---NHDVASGSTVIYLPQPEDEVVLEIFFTD--QNG-LFSDPGWADSLFSGFLLYVD-TDY  | 320 |
| <i>Myotis lucifugus</i> ADIG        | 227 | ---NHDVASGSTVIYLPQPEDEVVLEIFFND--QNG-LFSDPGWADSLFSGFLLYVD-TDY  | 279 |
| <i>Homo sapiens</i> ADIH            | 229 | ---NHDVASGSTILALKQGDEVVLQIFYSE--QNG-LFYDPYWTDSLFTGFLIYAD-QD-   | 280 |
| <i>Pan troglodytes</i> ADIH         | 229 | ---NHDVASGSTILALKQGDEVVLQIFYSE--QNG-LFYDPYWTDSLFTGFLIYAD-QD-   | 280 |
| <i>Pongo abelii</i> ADIH            | 229 | ---NHDVASGSTILALKQGDEVVLQIFYSE--QNG-LFYDPYWTDSLFTGFLIYAD-QD-   | 280 |
| <i>Nomascus leucogenys</i> ADIH     | 229 | ---NHDVASGSTILALKQGDEVVLQIFYSE--QNG-LFYDPYWTDSLFTGFLIYAD-QD-   | 280 |
| <i>Macaca mulatta</i> ADIH          | 229 | ---NHDVASGSTILALKQGDEVVLQIFYSE--QNG-LFYDPYWTDSLFTGFLIYAD-QD-   | 280 |
| <i>Papio hamadryas</i> ADIH         | 229 | ---NHDVASGSTILALKQGDEVVLQIFYSE--QNG-LFYDPYWTDSLFTGFLIYAD-QD-   | 280 |
| <i>Mus musculus</i> Adih            | 236 | ---NHDVASGSTILALKEGDEVVLQIFYSE--QNG-LFYDPYWTDSLFTGFLIYAD-QG-   | 287 |
| <i>Rattus norvegicus</i> Adih       | 273 | ---NHDVASGSTILALKEGDEVVLQIFYSE--QNG-LFYDPYWTDSLFTGFLIYAD-QG-   | 324 |
| <i>Dipodomys ordii</i> ADIH         | 229 | ---NHDIASGSTILALKQDDEVVLQIFYSE--QNG-LFYDPYWTDSLFTGFLIYAD-QG-   | 280 |
| <i>Cavia porcellus</i> ADIH         | 229 | ---NHDVASGSTILALKQGDEVVLQIFYSE--QNG-LFYDPYWTDSLFTGFLIYAD-QD-   | 280 |
| <i>Bos taurus</i> ADIH              | 246 | ---NHDVASGSTILALKQGDEVVLQIFYSE--QNG-LFYDPYWTDSLFTGFLIYAD-QD-   | 297 |
| <i>Equus caballus</i> ADIH          | 229 | ---NHDVASGSTILALKQGDEVVLQIFYSE--QNG-LFYDPYWTDSLFTGFLIYAD-QD-   | 280 |
| <i>Canis lupus familiaris</i> ADIH  | 229 | ---NHDVASGSTILALKQGDEVVLQIFYSE--QNG-LFYDPYWTDSLFTGFLIYAD-QD-   | 280 |
| <i>Pteropus vampyrus</i> ADIH       | 229 | ---NHDVASGSTILALKQGDEVVLQIFYSE--QNG-LFYDPYWTDSLFTGFLIYAD-QD-   | 280 |
| <i>Loxodonta africana</i> ADIH      | 229 | ---NHDVASGSTILALKQGDEVVLQIFYSE--QNG-LFYDPYWTDSLFTGFLIYAD-QD-   | 280 |
| <i>Homo sapiens</i> ADII            | 241 | ---NYDYASNSVVLHLDGDEVYVKL---D---GGKAHGGNNNKYSTFSGFLIYAD----    | 287 |
| <i>Pongo abelii</i> ADII            | 241 | ---NYDYASNSVVLHLDGDEVYVKL---D---GGKAHGGNNNKYSTFSGFLIYAD----    | 287 |
| <i>Macaca mulatta</i> ADII          | 241 | ---NYDYASNSVVLHLDGDEVYVKL---D---GGKAHGGNNNKYSTFSGFLIYAD----    | 287 |
| <i>Mus musculus</i> Adii            | 241 | ---NYDYASNSVVLHLDGDEVYVKL---D---GGKAHGGNNNKYSTFSGFLIYAD----    | 287 |
| <i>Rattus norvegicus</i> Adii       | 241 | ---NYDYASNSVVLHLDGDEVYVKL---D---GGKAHGGNNNKYSTFSGFLIYAD----    | 287 |
| <i>Bos taurus</i> ADII              | 241 | ---NYDYASNSVVLHLDGDEVYVKL---D---GGKAHGGNNNKYSTFSGFLIYAD----    | 287 |
| <i>Canis lupus familiaris</i> ADII  | 241 | ---NYDYASNSVVLHLDGDEVYVKL---D---GGKAHGGNNNKYSTFSGFLIYAD----    | 287 |
| <i>Dasyopus novemcinctus</i> ADII   | 241 | ---NYDYASNSVVLHLDGDEVYVKL---D---GGKAHGGNNNKYSTFSGFLIYAD----    | 287 |
| <i>Homo sapiens</i> ADIJ            | 209 | ---NYDYASNSVVLHLEPGDEVYIKL---D---GGKAHGGNNNKYSTFSGFLIYAD----   | 255 |
| <i>Pan troglodytes</i> ADIJ         | 209 | ---NYDYASNSVVLHLEPGDEVYIKL---D---GGKAHGGNNNKYSTFSGFLIYAD----   | 255 |
| <i>Papio hamadryas</i> ADIJ         | 209 | ---NYDYASNSVVLHLEPGDEVYIKL---D---GGKAHGGNNNKYSTFSGFLIYAD----   | 255 |
| <i>Mus musculus</i> Adij            | 209 | ---NYDYASNSVVLHLEPGDEVYIKL---D---GGKAHGGNNNKYSTFSGFLIYAD----   | 255 |
| <i>Rattus norvegicus</i> Adij       | 209 | ---NYDYASNSVVLHLEPGDEVYIKL---D---GGKAHGGNNNKYSTFSGFLIYAD----   | 255 |
| <i>Oryctolagus cuniculus</i> ADIJ   | 209 | ---NYDYASNSVVLHLEPGDEVYIKL---D---GGKAHGGNNNKYSTFSGFLIYAD----   | 255 |
| <i>Bos taurus</i> ADIJ              | 209 | ---NYDYASNSVVLHLEPGDEVYIKL---D---GGKAHGGNNNKYSTFSGFLIYAD----   | 255 |
| <i>Canis lupus familiaris</i> ADIJ  | 209 | ---NYDYASNSVVLHLEPGDEVYIKL---D---GGKAHGGNNNKYSTFSGFLIYAD----   | 255 |
| <i>Loxodonta africana</i> ADIJ      | 209 | ---NYDYASNSVVLHLEPGDEVYIKL---D---GGKAHGGNNNKYSTFSGFLIYAD----   | 255 |
| <i>Homo sapiens</i> ADIK            | 192 | ---NYDYASNSVILHLDVGDEVFIKL---D---GGKVHGGNTNKYSTFSGFLIYAD----   | 238 |
| <i>Pan troglodytes</i> ADIK         | 192 | ---NYDYASNSVILHLDVGDEVFIKL---D---GGKVHGGNTNKYSTFSGFLIYAD----   | 238 |
| <i>Gorilla gorilla</i> ADIK         | 192 | ---NYDYASNSVILHLDVGDEVFIKL---D---GGKVHGGNTNKYSTFSGFLIYAD----   | 238 |
| <i>Papio hamadryas</i> ADIK         | 192 | ---NYDYASNSVILHLDVGDEVFIKL---D---GGKVHGGNTNKYSTFSGFLIYAD----   | 238 |
| <i>Callithrix jacchus</i> ADIK      | 192 | ---NYDYASNSVILHLDVGDEVFIKL---D---GGKVHGGNTNKYSTFSGFLIYAD----   | 238 |
| <i>Rattus norvegicus</i> Adik       | 192 | ---NYDYASNSVILHLDVGDEVFIKL---D---GGKVHGGNTNKYSTFSGFLIYAD----   | 238 |
| <i>Cavia porcellus</i> ADIK         | 192 | ---NYDYASNSVILHLDVGDEVFIKL---D---GGKVHGGNTNKYSTFSGFLIYAD----   | 238 |
| <i>Equus caballus</i> ADIK          | 192 | ---NYDYASNSVILHLDVGDEVFIKL---D---GGKVHGGNTNKYSTFSGFLIYAD----   | 238 |
| <i>Canis lupus familiaris</i> ADIK  | 192 | ---NYDYASNSVILHLDVGDEVFIKL---D---GGKVHGGNTNKYSTFSGFLIYAD----   | 238 |
| <i>Dasyopus novemcinctus</i> ADIK   | 192 | ---NYDYASNSVILHLDVGDEVFIKL---D---GGKVHGGNTNKYSTFSGFLIYAD----   | 238 |
| <i>Loxodonta africana</i> ADIK      | 192 | ---NYDYASNSVILHLDVGDEVFIKL---D---GGKVHGGNTNKYSTFSGFLIYAD----   | 238 |
| <i>Mus musculus</i> Adil            | 212 | ---NYDYASNSVILHLDAGDEVFIKL---D---GGKAHGGNSNKYSTFSGFLIYSD----   | 258 |
| <i>Rattus norvegicus</i> Adil       | 212 | ---NYDYASNSVILHLDAGDEVFIKL---D---GGKAHGGNSNKYSTFSGFLIYSD----   | 258 |
| <i>Homo sapiens</i> ADIM            | 309 | --KGKSDTSSNHAVLKLAKGDEVVLRM---G---NGALH-GDHQRFSTFAGFLIF-E-TK-  | 357 |
| <i>Pan troglodytes</i> ADIM         | 309 | --KGKSDTSSNHAVLKLAKGDEVVLRM---G---NGALH-GDHQRFSTFAGFLIF-E-TK-  | 357 |

|                                    |     |           |                                                        |     |
|------------------------------------|-----|-----------|--------------------------------------------------------|-----|
| <i>Pongo abelii</i> ADIM           | 265 | -KGKSDTS  | SNHAVLKLAKGDEVVLRM---G---NGALH-GDHQRFSTFAGFLLF-E-TK-   | 313 |
| <i>Nomascus leucogenys</i> ADIM    | 309 | -KGKSDTS  | SNHAVLKLAKGDEVVLRM---G---NGALH-GDHQRFSTFAGFLLF-E-TK-   | 357 |
| <i>Papio hamadryas</i> ADIM        | 309 | -KGKSDTS  | SNHAVLKLAKGDEVVLRM---G---NGALH-GDHQRFSTFAGFLLF-E-TK-   | 357 |
| <i>Callithrix jacchus</i> ADIM     | 299 | -KGKSDTS  | SNHAVLKLAKGDEVVLRM---G---NGALH-GDHQRFSTFAGFLLF-E-TK-   | 347 |
| <i>Mus musculus</i> Adim           | 198 | -KGKSDTS  | SNHAVLKLAKGDEVVLRM---G---NGALH-GDHQRFSTFAGFLLF-E-TK-   | 246 |
| <i>Rattus norvegicus</i> Adim      | 272 | -KGKSDTS  | SNHAVLKLAKGDEVVLRM---G---NGALH-GDHQRFSTFAGFLLF-E-TK-   | 320 |
| <i>Cavia porcellus</i> ADIM        | 265 | -KGKSDTS  | SNHAVLKLAKGDEVVLRM---G---NGALH-GDHQRFSTFAGFLLF-E-TK-   | 313 |
| <i>Bos taurus</i> ADIM             | 198 | -KGKSDTS  | SNHAVLKLAKGDEVVLRM---G---NGALH-GDHQRFSTFAGFLLF-E-TK-   | 246 |
| <i>Equus caballus</i> ADIM         | 198 | -KGKSDTS  | SNHAVLKLAKGDEVVLRM---G---NGALH-GDHQRFSTFAGFLLF-E-TK-   | 246 |
| <i>Canis lupus familiaris</i> ADIM | 259 | -KGKSDTS  | SNHAVLKLAKGDEVVLRM---G---NGALH-GDHQRFSTFAGFLLF-E-TK-   | 307 |
| <i>Homo sapiens</i> ADIN           | 265 | --RRREMQS | QSVMLALRRGDVWLLSHDHD---GYGAYSN-HGKYITFSGFLVYPDLAPA     | 318 |
| <i>Pan troglodytes</i> ADIN        | 265 | --RRREMQS | QSVMLALRRGDVWLLSHDHD---GYGAYSN-HGKYITFSGFLVYPDLAPA     | 318 |
| <i>Pongo abelii</i> ADIN           | 265 | --RRREMQS | QSVMLALRRGDVWLLSHDHD---GYGAYSN-HGKYITFSGFLVYPDLAPA     | 318 |
| <i>Nomascus leucogenys</i> ADIN    | 260 | --RRREMQS | QSVMLALRRGDVWLLSHDHD---GYGAYSN-HGKYITFSGFLVYPDLAPA     | 313 |
| <i>Macaca mulatta</i> ADIN         | 267 | --RRREMQS | QSVMLALRRGDVWLLSHDHD---GYGAYSN-HGKYITFSGFLVYPDLAPA     | 320 |
| <i>Callithrix jacchus</i> ADIN     | 265 | --RRREMQS | QSVMLALRRGDVWLLSHDHD---GYGAYSN-HGKYITFSGFLVYPDLAPA     | 318 |
| <i>Mus musculus</i> Adin           | 263 | --RRREMQS | QSVMLPLRRGDVWLLSHDHD---GYGAYSN-HGKYITFSGFLVYPDLAAA     | 316 |
| <i>Cavia porcellus</i> ADIN        | 275 | --RRREMQS | QSVMLSLRRGDVWLLSHDHD---GYGAYSN-HGKYITFSGFLVYPDLTPD     | 328 |
| <i>Tursiops truncatus</i> ADIN     | 261 | --RRREMQS | QSVMLALRRGDVWLLSHDHD---GYGAYSN-HGKYITFSGFLVYPDLIPA     | 314 |
| <i>Canis lupus familiaris</i> ADIN | 261 | --RRREMQS | QSVMLALRRGDVWLLSHDHD---GYGAYSN-HGKYITFSGFLVYPDLAAT     | 314 |
| <i>Dasylops novemcinctus</i> ADIN  | 261 | --RRREMQS | QSVMLALRRGDVWLLSHDHD---GYGAYSN-HGKYITFSGFLVYPDLAPA     | 314 |
| <i>Loxodonta africana</i> ADIN     | 261 | --RRREMQS | SIMLALRQDQVWLLSHDHD---GYGAYSN-HGKYITFSGFLVYPDPA-A      | 313 |
| <i>Homo sapiens</i> ADIO           | 199 | ---RSVMAQ | QSLMILLAAGDAVWVRFQRD---RDNAIYGEHGDLYITFSGHIVKP----A    | 249 |
| <i>Pan troglodytes</i> ADIO        | 199 | ---RSVMAQ | QSLMILLAAGDAVWVRFQRD---RDNAIYGEHGDLYITFSGHIVKP----A    | 249 |
| <i>Macaca mulatta</i> ADIO         | 194 | ---RSVMAQ | QSLMILLAAGDAVWVRFQRE---QDNAYGERGDLYITFSGHIVKP----A     | 244 |
| <i>Bos taurus</i> ADIO             | 198 | ---RSVMAQ | QSLMILLAAGDAVWVRFQRD---RDNAIFGSEGLDYITFSGHIVKP----D    | 248 |
| <i>Myotis lucifugus</i> ADIO       | 198 | ---RSVMQ  | TOSLMLPLAAGDTAVWVRFKRD---QDNAYGEHGDLYITFSGHIVKP----A   | 248 |
| <i>Homo sapiens</i> ADIP           | 326 | ---RSIMQS | QSLMLELRQDQVWVRLFKGE---RENAIFSEELDTYITFSGYLVKH----A    | 376 |
| <i>Otolemur garnettii</i> ADIP     | 228 | ---RSIMQS | QSLMLLQREQDEVVWVRLFRGE---RENAIFSDEFDFTYITFSGYLVKH----A | 278 |
| <i>Mus musculus</i> Adip           | 228 | ---RSIMQS | QSLMMLREDEDEVVWVRLFKGE---RENAIFSDEFDFTYITFSGYLVKP----A | 278 |
| <i>Cavia porcellus</i> ADIP        | 228 | ---RSIMQS | QSLMLELRQDDEVVWVRLFKGE---RENAIFSDEFDFTYITFSGYLVKH----A | 278 |
| <i>Bos taurus</i> ADIP             | 251 | ---RSIMQS | QSLMLELRQDDEVVWVRLFKGE---RENAIFSDEFDFTYITFSGYLVKP----A | 301 |
| <i>Equus caballus</i> ADIP         | 226 | ---RSIMQS | QSLMLELRQDDEVVWVRLFKGE---RENAIFSDEFDFTYITFSGYLVKH----A | 276 |
| <i>Loxodonta africana</i> ADIP     | 280 | ---RSIMQS | QSLMLELRQDDEVVWVRLFKGE---RENAIFSDEFDFTYITFSGYLVKH----A | 330 |
| <i>Homo sapiens</i> ADIQ           | 226 | ---RSIMQS | QSVMLDLAYGDRVWVRLFKRQ---RENAIYSNDFDFTYITFSGHILIK-----A | 275 |
| <i>Pan troglodytes</i> ADIQ        | 226 | ---RSIMQS | QSVMLDLAYGDRVWVRLFKRQ---RENAIYSNDFDFTYITFSGHILIK-----A | 275 |
| <i>Pongo abelii</i> ADIQ           | 226 | ---RSIMQS | QSVMLDLAYGDRVWVRLFKRQ---RENAIYSNDFDFTYITFSGHILIK-----A | 275 |
| <i>Nomascus leucogenys</i> ADIQ    | 226 | ---RSIMQS | QSVMLDLAYGDRVWVRLFKRQ---RENAIYSNDFDFTYITFSGHILIK-----A | 275 |
| <i>Macaca mulatta</i> ADIQ         | 226 | ---RSIMQS | QSVMLDLAYGDRVWVRLFKRQ---RENAIYSNDFDFTYITFSGHILIK-----A | 275 |
| <i>Mus musculus</i> Adiq           | 212 | ---RSIMQS | QSVMLPLVFGDRVWVRLFKRE---RENGIYSDVDVDTYITFSGHILIK-----A | 261 |
| <i>Rattus norvegicus</i> Adiq      | 211 | ---RSIMQS | QSVMLPLVFGDYVWVRLFKRE---RENGIYSDMDTYITFSGHILIK-----A   | 260 |
| <i>Homo sapiens</i> ADIR           | 113 | ---DHETAS | NHAILQLFQGDQIWLRLHRGA---IYG--SS-W-KYSTFSGYLLYQD----    | 158 |
| <i>Pan troglodytes</i> ADIR        | 113 | ---DHETAS | NHAILQLFQGDQIWLRLHRGA---IYG--SS-W-KYSTFSGYLLYQD----    | 158 |
| <i>Pongo abelii</i> ADIR           | 113 | ---DHETAS | NHAILQLFQGDQIWLRLHRGA---IYG--SS-W-KYSTFSGYLLYQD----    | 158 |
| <i>Nomascus leucogenys</i> ADIR    | 113 | ---DHETAS | NHAILQLFQGDQIWLRLHRGA---IYG--SS-W-KYSTFSGYLLYQD----    | 158 |
| <i>Macaca mulatta</i> ADIR         | 113 | ---DHETAS | NHAILQLFQGDQIWLRLHRGA---IYG--SS-W-KYSTFSGYLLYQD----    | 158 |
| <i>Papio hamadryas</i> ADIR        | 113 | ---DHETAS | NHAILQLFQGDQIWLRLHRGA---IYG--SS-W-KYSTFSGYLLYQD----    | 158 |
| <i>Callithrix jacchus</i> ADIR     | 113 | ---DHETAS | NHAILQLFQGDQIWLRLHRGA---IYG--SS-W-KYSTFSGYLLYQD----    | 158 |
| <i>Tarsius syrichta</i> ADIR       | 113 | ---DHETAS | NHAILQLFQGDQIWLRLHRGA---IYG--SS-W-KYSTFSGYLLYQD----    | 158 |
| <i>Otolemur garnettii</i> ADIR     | 113 | ---DHETAS | NHAILQLFQGDQIWLRLHRGA---IYG--SS-W-KYSTFSGYLLYQD----    | 158 |
| <i>Tupaia belangeri</i> ADIR       | 113 | ---DHETAS | NHAILQLFQGDQIWLRLHRGA---IYG--SS-W-KYSTFSGYLLYQD----    | 158 |
| <i>Mus musculus</i> Adir           | 113 | ---DHETAS | NHAVLQLLQGDQIWLRLHRGA---IYG--SS-W-KYSTFSGYLLYQD----    | 158 |
| <i>Rattus norvegicus</i> Adir      | 113 | ---DHETAS | NHAVLQLLQGDQIWLRLHRGA---IYG--SS-W-KYSTFSGYLLYQD----    | 158 |
| <i>Cavia porcellus</i> ADIR        | 113 | ---DHETAS | NHAVLQLFQGDQIWLRLHRGA---IYG--SS-W-KYSTFSGYLLYQD----    | 158 |
| <i>Oryctolagus cuniculus</i> ADIR  | 113 | ---DHETAS | NHAVLQLFQGDQIWLRLHRGA---IYG--SS-W-KYSTFSGYLLYQD----    | 158 |
| <i>Tursiops truncatus</i> ADIR     | 113 | ---DHETAS | NHAVLQLFQGDQIWLRLHRGA---IYG--SS-W-KYSTFSGYLLYQD----    | 158 |
| <i>Bos taurus</i> ADIR             | 113 | ---DHETAS | NHAVLQLFQGDQIWLRLHRGA---IYG--SS-W-KYSTFSGYLLYQD----    | 158 |
| <i>Equus caballus</i> ADIR         | 113 | ---DHETAS | NHAVLQLFQGDQIWLRLHRGA---IYG--SS-W-KYSTFSGYLLYQD----    | 158 |
| <i>Canis lupus familiaris</i> ADIR | 113 | ---DHETAS | NHAVLQLFQGDQIWLRLHRGA---IYG--SS-W-KYSTFSGYLLYQD----    | 158 |
| <i>Myotis lucifugus</i> ADIR       | 113 | ---DHETAS | NHAVLQLFQGDQIWLRLHRGA---IYG--SS-W-KYSTFSGYLLYQD----    | 158 |
| <i>Pteropus vampyrus</i> ADIR      | 113 | ---DHETAS | NHAVLQLFQGDQIWLRLHRGA---IYG--SS-W-KYSTFSGYLLYQD----    | 158 |
| <i>Erinaceus europaeus</i> ADIR    | 87  | ---DHETAS | NHAVLQLCRGDQIWLRLHRGA---IYG--SS-W-KYSTFSGYLLYQD----    | 132 |
| <i>Dasylops novemcinctus</i> ADIR  | 113 | ---DHETAS | NHAVLQLFQGDQIWLRLHRGA---IYG--SS-W-KYSTFSGYLLYQD----    | 158 |
| <i>Choloepus hoffmanni</i> ADIR    | 113 | ---DHETAS | NHAVLQLFQGDQIWLRLHRGA---IYG--SS-W-KYSTFSGYLLYQD----    | 158 |
| <i>Loxodonta africana</i> ADIR     | 113 | ---DHETAS | NHAVLQLFQGDQIWLRLHRGA---IYG--SS-W-KYSTFSGYLLYQD----    | 158 |

|                                    |     |              |     |
|------------------------------------|-----|--------------|-----|
| <i>Homo sapiens</i> ADIA           | -   | -----&       | -   |
|                                    |     | 850          |     |
| <i>Homo sapiens</i> ADIA           | -   | -----&       | -   |
| <i>Papio hamadryas</i> ADIA        | -   | -----&       | -   |
| <i>Mus musculus</i> Adia           | -   | -----&       | -   |
| <i>Rattus norvegicus</i> Adia      | -   | -----&       | -   |
| <i>Cavia porcellus</i> ADIA        | -   | -----&       | -   |
| <i>Ochotona princeps</i> ADIA      | -   | -----&       | -   |
| <i>Bos taurus</i> ADIA             | -   | -----&       | -   |
| <i>Equus caballus</i> ADIA         | -   | -----&       | -   |
| <i>Canis lupus familiaris</i> ADIA | -   | -----&       | -   |
| <i>Felis catus</i> ADIA            | -   | -----&       | -   |
| <i>Myotis lucifugus</i> ADIA       | -   | -----&       | -   |
| <i>Dasyopus novemcinctus</i> ADIA  | -   | -----&       | -   |
| <i>Loxodonta africana</i> ADIA     | -   | -----&       | -   |
| <i>Homo sapiens</i> ADIB           | -   | -----&       | -   |
| <i>Pan troglodytes</i> ADIB        | -   | -----&       | -   |
| <i>Pongo abelii</i> ADIB           | -   | -----&       | -   |
| <i>Nomascus leucogenys</i> ADIB    | -   | -----&       | -   |
| <i>Callithrix jacchus</i> ADIB     | -   | -----&       | -   |
| <i>Otolemur garnettii</i> ADIB     | -   | -----&       | -   |
| <i>Mus musculus</i> Adib           | -   | -----&       | -   |
| <i>Rattus norvegicus</i> Adib      | -   | -----&       | -   |
| <i>Cavia porcellus</i> ADIB        | -   | -----&       | -   |
| <i>Oryctolagus cuniculus</i> ADIB  | -   | -----&       | -   |
| <i>Bos taurus</i> ADIB             | -   | -----&       | -   |
| <i>Equus caballus</i> ADIB         | -   | -----&       | -   |
| <i>Canis lupus familiaris</i> ADIB | -   | -----&       | -   |
| <i>Myotis lucifugus</i> ADIB       | -   | -----&       | -   |
| <i>Loxodonta africana</i> ADIB     | -   | -----&       | -   |
| <i>Homo sapiens</i> ADIC           | -   | -----&       | -   |
| <i>Macaca mulatta</i> ADIC         | -   | -----&       | -   |
| <i>Papio hamadryas</i> ADIC        | -   | -----&       | -   |
| <i>Callithrix jacchus</i> ADIC     | -   | -----&       | -   |
| <i>Mus musculus</i> Adic           | -   | -----&       | -   |
| <i>Rattus norvegicus</i> Adic      | -   | -----&       | -   |
| <i>Cavia porcellus</i> ADIC        | -   | -----&       | -   |
| <i>Oryctolagus cuniculus</i> ADIC  | -   | -----&       | -   |
| <i>Equus caballus</i> ADIC         | -   | -----&       | -   |
| <i>Canis lupus familiaris</i> ADIC | -   | -----&       | -   |
| <i>Myotis lucifugus</i> ADIC       | -   | -----&       | -   |
| <i>Loxodonta africana</i> ADIC     | -   | -----&       | -   |
| <i>Homo sapiens</i> ADID           | -   | -----&       | -   |
| <i>Pan troglodytes</i> ADID        | -   | -----&       | -   |
| <i>Pongo abelii</i> ADID           | -   | -----&       | -   |
| <i>Nomascus leucogenys</i> ADID    | -   | -----&       | -   |
| <i>Macaca mulatta</i> ADID         | -   | -----&       | -   |
| <i>Otolemur garnettii</i> ADID     | -   | -----&       | -   |
| <i>Mus musculus</i> Adid           | -   | -----&       | -   |
| <i>Rattus norvegicus</i> Adid      | -   | -----&       | -   |
| <i>Cavia porcellus</i> ADID        | 289 | S-----&      | 289 |
| <i>Oryctolagus cuniculus</i> ADID  | -   | -----&       | -   |
| <i>Bos taurus</i> ADID             | -   | -----&       | -   |
| <i>Equus caballus</i> ADID         | -   | -----&       | -   |
| <i>Canis lupus familiaris</i> ADID | -   | -----&       | -   |
| <i>Felis catus</i> ADID            | -   | -----&       | -   |
| <i>Myotis lucifugus</i> ADID       | -   | -----&       | -   |
| <i>Dasyopus novemcinctus</i> ADID  | -   | -----&       | -   |
| <i>Loxodonta africana</i> ADID     | -   | -----&       | -   |
| <i>Homo sapiens</i> ADIE           | 239 | -SPVF----A-& | 243 |
| <i>Pan troglodytes</i> ADIE        | 239 | -SPVF----A-& | 243 |
| <i>Pongo abelii</i> ADIE           | 239 | -SPVF----A-& | 243 |
| <i>Papio hamadryas</i> ADIE        | 239 | -SPVF----A-& | 243 |
| <i>Callithrix jacchus</i> ADIE     | 239 | -SPVF----A-& | 243 |
| <i>Otolemur garnettii</i> ADIE     | 239 | -SPVF----A-& | 243 |
| <i>Mus musculus</i> Adie           | 239 | -SPVF----A-& | 243 |
| <i>Rattus norvegicus</i> Adie      | 239 | -SPVF----A-& | 243 |
| <i>Homo sapiens</i> ADIF1          | -   | -----&       | -   |
| <i>Homo sapiens</i> ADIF2          | -   | -----&       | -   |
| <i>Pan troglodytes</i> ADIF1       | -   | -----&       | -   |
| <i>Pongo abelii</i> ADIF1          | -   | -----&       | -   |
| <i>Nomascus leucogenys</i> ADIF1   | -   | -----&       | -   |
| <i>Macaca mulatta</i> ADIF1        | -   | -----&       | -   |
| <i>Papio hamadryas</i> ADIF1       | -   | -----&       | -   |

|                                     |     |              |     |
|-------------------------------------|-----|--------------|-----|
| <i>Microcebus murinus</i> ADIF1     | -   | -----&       | -   |
| <i>Otolemur garnettii</i> ADIF1     | -   | -----&       | -   |
| <i>Mus musculus</i> Adif1           | -   | -----&       | -   |
| <i>Rattus norvegicus</i> Adif1      | -   | -----&       | -   |
| <i>Cavia porcellus</i> ADIF1        | -   | -----&       | -   |
| <i>Oryctolagus cuniculus</i> ADIF1  | -   | -----&       | -   |
| <i>Ochotona princeps</i> ADIF1      | -   | -----&       | -   |
| <i>Bos taurus</i> ADIF1             | -   | -----&       | -   |
| <i>Equus caballus</i> ADIF1         | -   | -----&       | -   |
| <i>Canis lupus familiaris</i> ADIF1 | -   | -----&       | -   |
| <i>Felis catus</i> ADIF1            | -   | -----&       | -   |
| <i>Dasyopus novemcinctus</i> ADIF1  | -   | -----&       | -   |
| <i>Loxodonta africana</i> ADIF1     | -   | -----&       | -   |
| <i>Homo sapiens</i> ADIG            | 334 | LDSISEDDEL-& | 343 |
| <i>Pan troglodytes</i> ADIG         | 334 | LDSISEDDEL-& | 343 |
| <i>Pongo abelii</i> ADIG            | 334 | LDSISEDDEL-& | 343 |
| <i>Callithrix jacchus</i> ADIG      | 320 | LDSISEDDEL-& | 329 |
| <i>Otolemur garnettii</i> ADIG      | 280 | LDSISEDDEL-& | 289 |
| <i>Mus musculus</i> Adig            | 322 | LDSISEDDEL-& | 331 |
| <i>Rattus norvegicus</i> Adig       | 323 | LDSISEDDEL-& | 332 |
| <i>Cavia porcellus</i> ADIG         | 280 | LDAISEDDEL-& | 289 |
| <i>Oryctolagus cuniculus</i> ADIG   | 280 | LDSISEDDEL-& | 289 |
| <i>Tursiops truncatus</i> ADIG      | 332 | LDSISEDDEL-& | 341 |
| <i>Bos taurus</i> ADIG              | 280 | LDSISEDDEL-& | 289 |
| <i>Equus caballus</i> ADIG          | 321 | LDSISEDDEL-& | 330 |
| <i>Canis lupus familiaris</i> ADIG  | 321 | LDSISEDDEL-& | 330 |
| <i>Myotis lucifugus</i> ADIG        | 280 | LDSISEDDEL-& | 289 |
| <i>Homo sapiens</i> ADIH            | 281 | -DP-N---EV-& | 285 |
| <i>Pan troglodytes</i> ADIH         | 281 | -DP-N---EV-& | 285 |
| <i>Pongo abelii</i> ADIH            | 281 | -DP-N---EI-& | 285 |
| <i>Nomascus leucogenys</i> ADIH     | 281 | -DP-N---EV-& | 285 |
| <i>Macaca mulatta</i> ADIH          | 281 | -DP-N---EV-& | 285 |
| <i>Papio hamadryas</i> ADIH         | 281 | -DP-N---EV-& | 285 |
| <i>Mus musculus</i> Adih            | 288 | -DP-N---EV-& | 292 |
| <i>Rattus norvegicus</i> Adih       | 325 | -DP-N---EV-& | 329 |
| <i>Dipodomys ordii</i> ADIH         | 281 | -GP-N---EV-& | 285 |
| <i>Cavia porcellus</i> ADIH         | 281 | -NP-N---EL-& | 285 |
| <i>Bos taurus</i> ADIH              | 298 | -NP-S---EV-& | 302 |
| <i>Equus caballus</i> ADIH          | 281 | -NP-N---EL-& | 285 |
| <i>Canis lupus familiaris</i> ADIH  | 281 | -NP-N---EV-& | 285 |
| <i>Pteropus vampyrus</i> ADIH       | 281 | -DP-N---EV-& | 285 |
| <i>Loxodonta africana</i> ADIH      | 281 | -DP-N---EV-& | 285 |
| <i>Homo sapiens</i> ADII            | -   | -----&       | -   |
| <i>Pongo abelii</i> ADII            | -   | -----&       | -   |
| <i>Macaca mulatta</i> ADII          | -   | -----&       | -   |
| <i>Mus musculus</i> Adii            | -   | -----&       | -   |
| <i>Rattus norvegicus</i> Adii       | -   | -----&       | -   |
| <i>Bos taurus</i> ADII              | -   | -----&       | -   |
| <i>Canis lupus familiaris</i> ADII  | -   | -----&       | -   |
| <i>Dasyopus novemcinctus</i> ADII   | -   | -----&       | -   |
| <i>Homo sapiens</i> ADIJ            | -   | -----&       | -   |
| <i>Pan troglodytes</i> ADIJ         | -   | -----&       | -   |
| <i>Papio hamadryas</i> ADIJ         | -   | -----&       | -   |
| <i>Mus musculus</i> Adij            | -   | -----&       | -   |
| <i>Rattus norvegicus</i> Adij       | -   | -----&       | -   |
| <i>Oryctolagus cuniculus</i> ADIJ   | -   | -----&       | -   |
| <i>Bos taurus</i> ADIJ              | -   | -----&       | -   |
| <i>Canis lupus familiaris</i> ADIJ  | -   | -----&       | -   |
| <i>Loxodonta africana</i> ADIJ      | -   | -----&       | -   |
| <i>Homo sapiens</i> ADIK            | -   | -----&       | -   |
| <i>Pan troglodytes</i> ADIK         | -   | -----&       | -   |
| <i>Gorilla gorilla</i> ADIK         | -   | -----&       | -   |
| <i>Papio hamadryas</i> ADIK         | -   | -----&       | -   |
| <i>Callithrix jacchus</i> ADIK      | -   | -----&       | -   |
| <i>Rattus norvegicus</i> Adik       | -   | -----&       | -   |
| <i>Cavia porcellus</i> ADIK         | -   | -----&       | -   |
| <i>Equus caballus</i> ADIK          | -   | -----&       | -   |
| <i>Canis lupus familiaris</i> ADIK  | -   | -----&       | -   |
| <i>Dasyopus novemcinctus</i> ADIK   | -   | -----&       | -   |
| <i>Loxodonta africana</i> ADIK      | -   | -----&       | -   |
| <i>Mus musculus</i> Adil            | -   | -----&       | -   |
| <i>Rattus norvegicus</i> Adil       | -   | -----&       | -   |
| <i>Homo sapiens</i> ADIM            | -   | -----&       | -   |
| <i>Pan troglodytes</i> ADIM         | -   | -----&       | -   |

|                                    |     |              |     |
|------------------------------------|-----|--------------|-----|
| <i>Pongo abelii</i> ADIM           | -   | -----&       | -   |
| <i>Nomascus leucogenys</i> ADIM    | -   | -----&       | -   |
| <i>Papio hamadryas</i> ADIM        | -   | -----&       | -   |
| <i>Callithrix jacchus</i> ADIM     | -   | -----&       | -   |
| <i>Mus musculus</i> Adim           | -   | -----&       | -   |
| <i>Rattus norvegicus</i> Adim      | -   | -----&       | -   |
| <i>Cavia porcellus</i> ADIM        | -   | -----&       | -   |
| <i>Bos taurus</i> ADIM             | -   | -----&       | -   |
| <i>Equus caballus</i> ADIM         | -   | -----&       | -   |
| <i>Canis lupus familiaris</i> ADIM | -   | -----&       | -   |
| <i>Homo sapiens</i> ADIN           | 319 | APPGLGASELL& | 329 |
| <i>Pan troglodytes</i> ADIN        | 319 | APPGLGASELL& | 329 |
| <i>Pongo abelii</i> ADIN           | 319 | APPGLGASELL& | 329 |
| <i>Nomascus leucogenys</i> ADIN    | 314 | APPGLEASELL& | 324 |
| <i>Macaca mulatta</i> ADIN         | 321 | APPGLGAPELL& | 331 |
| <i>Callithrix jacchus</i> ADIN     | 319 | GPPGLGARELL& | 329 |
| <i>Mus musculus</i> Adin           | 317 | GPPALKPPE-L& | 326 |
| <i>Cavia porcellus</i> ADIN        | 329 | GDP-----E-L& | 333 |
| <i>Tursiops truncatus</i> ADIN     | 315 | GPPGLGPPE-L& | 324 |
| <i>Canis lupus familiaris</i> ADIN | 315 | GPPGLGPPE-L& | 324 |
| <i>Dasyops novemcinctus</i> ADIN   | 315 | GLPGLGPAE-L& | 324 |
| <i>Loxodonta africana</i> ADIN     | 314 | HPPGLGPPE-L& | 323 |
| <i>Homo sapiens</i> ADIO           | 250 | A-----EL-&   | 252 |
| <i>Pan troglodytes</i> ADIO        | 250 | A-----EL-&   | 252 |
| <i>Macaca mulatta</i> ADIO         | 245 | A-----EL-&   | 247 |
| <i>Bos taurus</i> ADIO             | 249 | A-----EL-&   | 251 |
| <i>Myotis lucifugus</i> ADIO       | 249 | A-----EL-&   | 251 |
| <i>Homo sapiens</i> ADIP           | 377 | T-----EP-&   | 379 |
| <i>Otolemur garnettii</i> ADIP     | 279 | A-----EP-&   | 281 |
| <i>Mus musculus</i> Adip           | 279 | S-----EP-&   | 281 |
| <i>Cavia porcellus</i> ADIP        | 279 | A-----EP-&   | 281 |
| <i>Bos taurus</i> ADIP             | 302 | N-----EP-&   | 304 |
| <i>Equus caballus</i> ADIP         | 277 | A-----EP-&   | 279 |
| <i>Loxodonta africana</i> ADIP     | 331 | A-----EP-&   | 333 |
| <i>Homo sapiens</i> ADIQ           | 276 | E-----DD-&   | 278 |
| <i>Pan troglodytes</i> ADIQ        | 276 | E-----DD-&   | 278 |
| <i>Pongo abelii</i> ADIQ           | 276 | E-----DD-&   | 278 |
| <i>Nomascus leucogenys</i> ADIQ    | 276 | E-----DD-&   | 278 |
| <i>Macaca mulatta</i> ADIQ         | 276 | E-----DD-&   | 278 |
| <i>Mus musculus</i> Adiq           | 262 | E-----DN-&   | 264 |
| <i>Rattus norvegicus</i> Adiq      | 261 | E-----DN-&   | 263 |
| <i>Homo sapiens</i> ADIR           | -   | -----&       | -   |
| <i>Pan troglodytes</i> ADIR        | -   | -----&       | -   |
| <i>Pongo abelii</i> ADIR           | -   | -----&       | -   |
| <i>Nomascus leucogenys</i> ADIR    | -   | -----&       | -   |
| <i>Macaca mulatta</i> ADIR         | -   | -----&       | -   |
| <i>Papio hamadryas</i> ADIR        | -   | -----&       | -   |
| <i>Callithrix jacchus</i> ADIR     | -   | -----&       | -   |
| <i>Tarsius syrichta</i> ADIR       | -   | -----&       | -   |
| <i>Otolemur garnettii</i> ADIR     | -   | -----&       | -   |
| <i>Tupaia belangeri</i> ADIR       | -   | -----&       | -   |
| <i>Mus musculus</i> Adir           | -   | -----&       | -   |
| <i>Rattus norvegicus</i> Adir      | -   | -----&       | -   |
| <i>Cavia porcellus</i> ADIR        | -   | -----&       | -   |
| <i>Oryctolagus cuniculus</i> ADIR  | -   | -----&       | -   |
| <i>Tursiops truncatus</i> ADIR     | -   | -----&       | -   |
| <i>Bos taurus</i> ADIR             | -   | -----&       | -   |
| <i>Equus caballus</i> ADIR         | -   | -----&       | -   |
| <i>Canis lupus familiaris</i> ADIR | -   | -----&       | -   |
| <i>Myotis lucifugus</i> ADIR       | -   | -----&       | -   |
| <i>Pteropus vampyrus</i> ADIR      | -   | -----&       | -   |
| <i>Erinaceus europaeus</i> ADIR    | -   | -----&       | -   |
| <i>Dasyops novemcinctus</i> ADIR   | -   | -----&       | -   |
| <i>Choloepus hoffmanni</i> ADIR    | -   | -----&       | -   |
| <i>Loxodonta africana</i> ADIR     | -   | -----&       | -   |
