# Supplementary material for: Comparative genomic analysis of eutherian adiponectin genes
Source: PubMed Central journal article supplement (PMC6040601; doi:10.1016/j.heliyon.2018.e00647), 2018-06-06

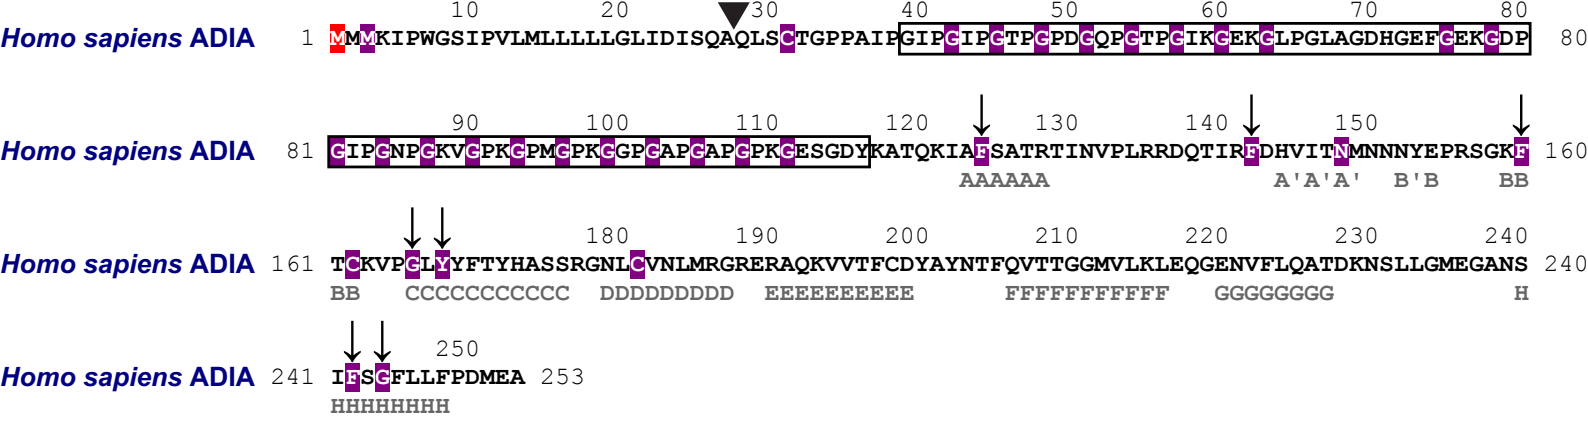

Supplement: mmc6.pdf [file mmc6.pdf]
